# Supplementary material for: Selective single C–F bond arylation of trifluoromethylalkene derivatives
Source: PubMed Central journal article supplement — Chem Sci. 2019 Aug 5;10(37):8701–5. doi: 10.1039/c9sc01966a (PMC6849639; doi:10.1039/c9sc01966a), 2019-08-05
Supplement: SC-010-C9SC01966A-s001.pdf [file SC-010-C9SC01966A-s001.pdf]

# Selective Single C–F Bond Arylation of Trifluoromethylalkene Derivatives

Luning Tang, Ze-Yao Liu, Wenzhi She and Chao Feng\*

*Institute of Advanced Synthesis, School of Chemistry and Molecular Engineering,  
Nanjing Tech University, Nanjing, Jiangsu 211816, P. R. China.  
iamcfeng@njtech.edu.cn*

| <b>Table of Contents</b>                                | <b>Page</b> |
|---------------------------------------------------------|-------------|
| <b>General Information</b>                              | <b>2</b>    |
| <b>Experimental Section</b>                             | <b>3</b>    |
| <b>Substrate synthesis</b>                              | <b>3</b>    |
| <b>Optimization of reaction conditions</b>              | <b>4</b>    |
| <b>General procedure for the reaction</b>               | <b>9</b>    |
| <b>Characterization of structurally novel compounds</b> | <b>16</b>   |
| <b><sup>1</sup>H and <sup>13</sup>C NMR spectra</b>     | <b>59</b>   |
| <b>References</b>                                       | <b>166</b>  |

## General Information

$\text{Pd}(\text{PPh}_3)_4$  was purchased from Chemical Service and used as received.  $\text{Cs}_2\text{CO}_3$ ,  $\text{K}_2\text{CO}_3$ , anhydrous 1,4-dioxane,  $\text{Et}_2\text{O}$ ,  $\text{CuBr}\cdot\text{Me}_2\text{S}$ ,  $\text{P}(\text{4-CF}_3\text{Ph})_3$ ,  $\text{C}^n\text{BuLi}$ ,  $\text{MeOTf}$ , hexahydroazine, phenylboronic acid, (4-methoxyphenyl)boronic acid, (2,3-dihydrobenzo[b][1,4]dioxin-6-yl)boronic acid, naphthalen-2-ylboronic acid, (9-phenyl-9H-carbazol-3-yl)boronic acid, cyclohex-1-en-1-ylboronic acid, benzofuran-5-ylboronic acid *et al.* were purchased from commercial suppliers and used as received unless otherwise noted. All reactions were carried out under air without extra protection unless otherwise noted. Reactions were monitored by thin layer chromatography [Merck 60 F254 precoated silica gel plate (0.2 mm thickness)]. Subsequent to elution, spots were visualized using UV radiation (254 nm) on Spectroline Model ENF-24061/F 254 nm. Further visualization was possible using basic solution of potassium permanganate as stain. Flash chromatography was performed using Merck silica gel 60 with distilled solvents. HRMS spectra were recorded on a Waters Q-TOF Premier Spectrometer.  $^1\text{H}$  NMR and  $^{13}\text{C}$  NMR spectra were recorded using Bruker Avance 400 MHz spectrometers. Chemical shifts for  $^1\text{H}$  NMR spectra are reported as  $\delta$  in units of parts per million (ppm) downfield from  $\text{SiMe}_4$  ( $\delta$  0.0) and relative to the signal of chloroform-*d* ( $\delta$  7.26, singlet). Multiplicities were given as: s (singlet); d (doublet); t (triplet); q (quartet); dd (doublet of doublets); dt (doublet of triplets); m (multiplet) and *etc.*

Coupling constants are reported as a  $J$  value in Hz. Carbon nuclear magnetic resonance spectra ( $^{13}\text{C}$  NMR) are reported as  $\delta$  in units of parts per million (ppm) downfield from  $\text{SiMe}_4$  ( $\delta$  0.0) and relative to the signal of chloroform- $d$  ( $\delta$  77.00, triplet).

## Experimental Section

### Substrate synthesis

#### Trifluoromethylalkenes 1 examined:

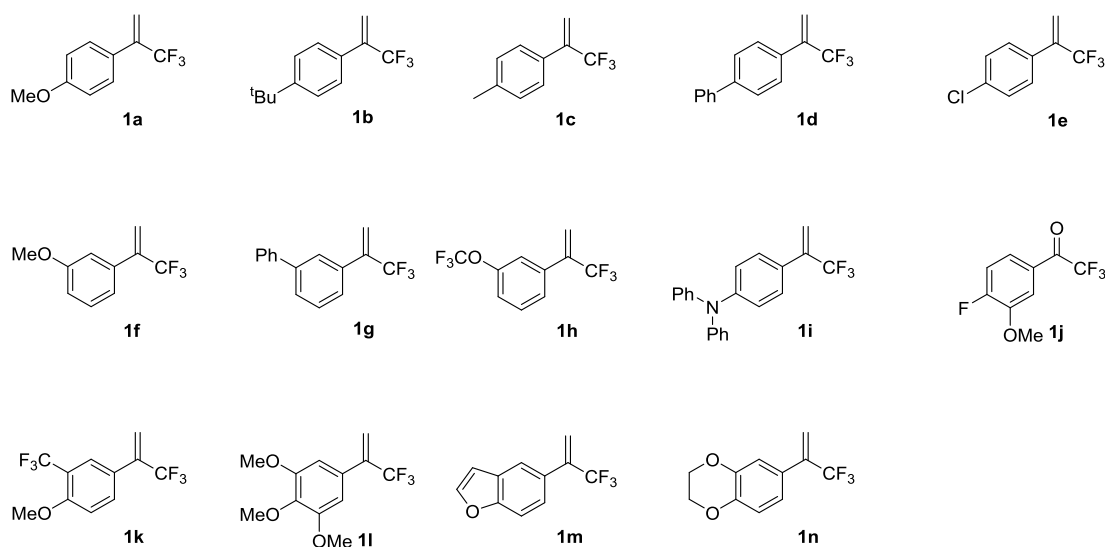

Trifluoromethylalkenes 1 were prepared according to the reported methods<sup>[1]</sup>.

#### General reaction scheme for 1 synthesis:

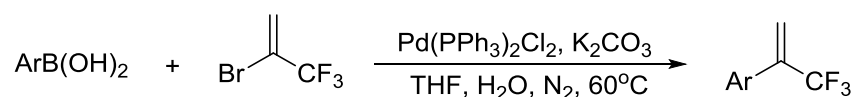

#### Synthetic procedure:

To a Schlenk tube equipped with a magnetic stir bar were added aqueous  $\text{K}_2\text{CO}_3$  (2.0 M, 40 mL), THF (60 mL), arylboronic acid (20 mmol), 2-bromo-3,3,3-trifluoropropene (7.00 g, 40 mmol) and  $\text{PdCl}_2(\text{PPh}_3)_2$  (0.14 g,

0.2 mmol). The resulting solution was stirred at 60 °C for 24 h. After the reaction mixture was cooled to room temperature, the reaction mixture was quenched with saturated aqueous NH<sub>4</sub>Cl, and extracted with EtOAc (3 × 20 mL). The combined organic layers were dried (Na<sub>2</sub>SO<sub>4</sub>) and the solvent was removed under reduced pressure. The resultant crude product material was purified by flash chromatography using the appropriate gradient of petroleum ether and ethyl acetate.

### Optimization of reaction conditions

To a Schlenk tube equipped with a magnetic stir bar were added base, Pd salt, ligand, Cu salt, 5 Å molecular sieve, phenylboronic acid (2 equiv), **3a** (1 equiv) and 1,4-dioxane. The resulting solution was stirred at 80 °C for 20 h. After the reaction mixture was cooled to room temperature, the yield was determined by <sup>19</sup>F NMR before working up. If necessary, the reaction mixture was quenched with saturated aqueous NH<sub>4</sub>Cl, and extracted with EtOAc. The combined organic layers were dried (Na<sub>2</sub>SO<sub>4</sub>) and the solvent was removed under reduced pressure. The resultant crude product material was purified by flash chromatography to give the pure **4a**.

### Table S1. Screening of ligand.

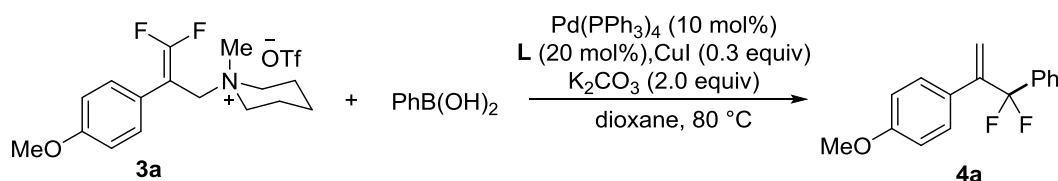

| entry | ligand                                                           | yield (%) |
|-------|------------------------------------------------------------------|-----------|
| 1     | X-Phos                                                           | 41        |
| 2     | P(4-CF <sub>3</sub> C <sub>6</sub> H <sub>5</sub> ) <sub>3</sub> | 50        |
| 3     | P(C <sub>6</sub> F <sub>5</sub> ) <sub>3</sub>                   | 39        |
| 4     | Cphos                                                            | 32        |
| 5     | TTMPP                                                            | 46        |

**Table S2. Screening of the stoichiometry of CuI.**

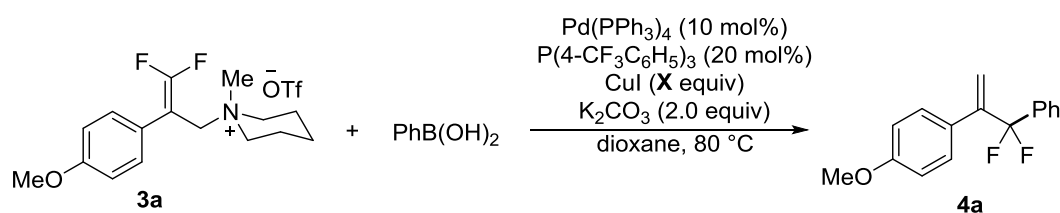

| entry | CuI (X equiv) | yield (%) |
|-------|---------------|-----------|
| 1     | 0             | trace     |
| 2     | 0.1           | 5         |
| 3     | 0.3           | 50        |
| 4     | 0.5           | 56        |
| 5     | 1.0           | 72        |
| 6     | 2.0           | 80        |
| 7     | 2.5           | 80        |
| 8     | 3.0           | 80        |

**Table S3. Screening of Pd species.**

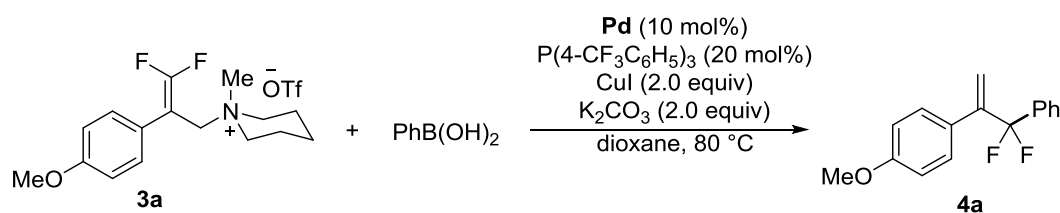

| entry | Pd                                                 | yield (%) |
|-------|----------------------------------------------------|-----------|
| 1     | Pd <sub>2</sub> (dba) <sub>3</sub>                 | 68        |
| 2     | Pd(PPh <sub>3</sub> ) <sub>2</sub> Cl <sub>2</sub> | 64        |
| 3     | PdCl <sub>2</sub>                                  | 11        |
| 4     | Pd(TFA) <sub>2</sub>                               | 33        |
| 5     | Pd[( <i>t</i> -Bu) <sub>3</sub> P] <sub>2</sub>    | 60        |
| 6     | [Pd(allyl)Cl] <sub>2</sub>                         | 49        |

**Table S4. Screening of Pd species and assisting ligand.**

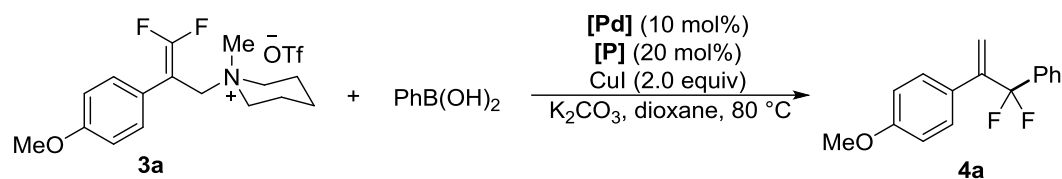

| entry | [Pd]                        | [P]                                                                                  | yield (%) |
|-------|-----------------------------|--------------------------------------------------------------------------------------|-----------|
| 1     | $\text{Pd}(\text{PPh}_3)_4$ | $\text{P}(4\text{-CF}_3\text{C}_6\text{H}_5)_3$                                      | 80        |
| 2     | $\text{Pd}(\text{PPh}_3)_4$ | -                                                                                    | 72        |
| 3     | $\text{Pd}_2(\text{dba})_3$ | $\text{P}(4\text{-CF}_3\text{C}_6\text{H}_5)_3$                                      | 68        |
| 4     | $\text{Pd}_2(\text{dba})_3$ | $\text{PPh}_3$                                                                       | 60        |
| 5     | $\text{Pd}_2(\text{dba})_3$ | X-phos                                                                               | 26        |
| 6     | $\text{Pd}_2(\text{dba})_3$ | Cphos                                                                                | 26        |
| 7     | $\text{Pd}_2(\text{dba})_3$ | TTMPP                                                                                | 74        |
| 8     | $\text{Pd}_2(\text{dba})_3$ | Xantphos                                                                             | trace     |
| 9     | $\text{Pd}_2(\text{dba})_3$ | $\text{PPh}_3$ (10 mol%) + $\text{P}(4\text{-CF}_3\text{C}_6\text{H}_5)_3$ (10 mol%) | 79        |

We have examined the Pd source and ancillary ligands. From these results, we could clearly see that the combination of  $\text{Pd}_2(\text{dba})_3$  5 mol% ( $[\text{Pd}]$  10 mol%) and  $\text{PPh}_3$  10 mol%,  $(4\text{-CF}_3\text{C}_6\text{H}_5)_3$  10 mol% led to the formation of desired product **4a** in a yield that is equal to the optimal catalyst composition ( $\text{Pd}(\text{PPh}_3)_4$  10 mol%,  $(4\text{-CF}_3\text{C}_6\text{H}_5)_3$  20 mol%), whereas the employment of other type of tertiary phosphines as the single assisting ligands was revealed to be inferior. Therefore, it is quite reasonable to inferring the active catalyst in the optimal conditions is a heteroleptic diphosphine Pd(0) complex  $\{\text{Pd}(\text{PPh}_3)(4\text{-CF}_3\text{C}_6\text{H}_5)\}$ .

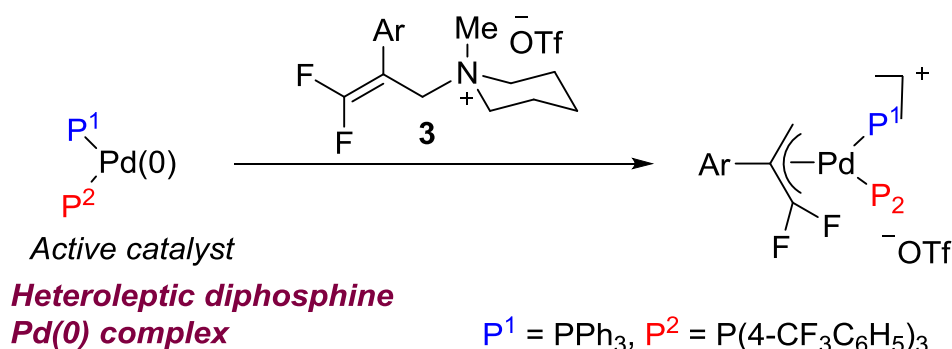

**Table S5. Screening of base.**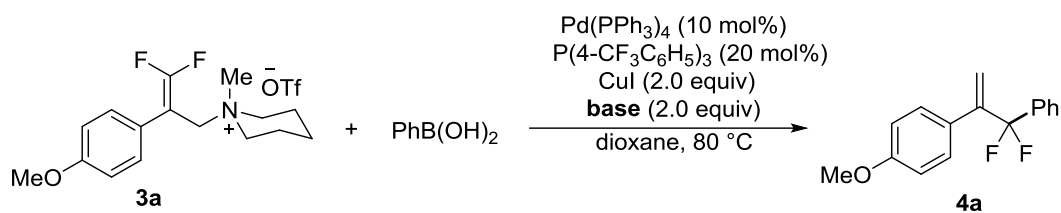

| entry | Pd                       | yield (%) |
|-------|--------------------------|-----------|
| 1     | $\text{Cs}_2\text{CO}_3$ | 83        |
| 2     | $\text{NaOt-Bu}$         | 47        |
| 3     | $\text{KH}_2\text{PO}_4$ | 30        |
| 4     | $\text{NaHCO}_3$         | 58        |
| 5     | $\text{Na}_2\text{CO}_3$ | 78        |
| 6     | $\text{NaOH}$            | 55        |
| 7     | $\text{CH}_3\text{OK}$   | 32        |
| 8     | $\text{NaOEt}$           | 55        |
| 9     | $\text{NaH}$             | 76        |

**Table S6. Screening of Cu salt.**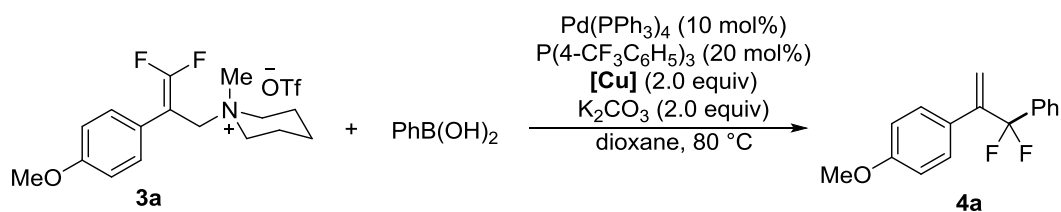

| entry | [Cu]                                  | yield (%) |
|-------|---------------------------------------|-----------|
| 1     | $\text{Cu(MeCN)}_4\text{PF}_6$        | 56        |
| 2     | $\text{Cu(MeCN)}_4\text{BF}_4$        | 58        |
| 3     | $\text{Cu}_2\text{O}$                 | trace     |
| 4     | $\text{CuCNS}$                        | trace     |
| 5     | $\text{CuBr}\cdot\text{Me}_2\text{S}$ | 85        |
| 6     | $\text{CuTc}$                         | 31        |
| 7     | $\text{CuBr}$                         | 53        |
| 8     | $\text{CuCl}$                         | 61        |
| 9     | $\text{CuOAc}$                        | 29        |
| 10    | $\text{CuCN}$                         | 48        |

**Table S7. Screening of additive.**

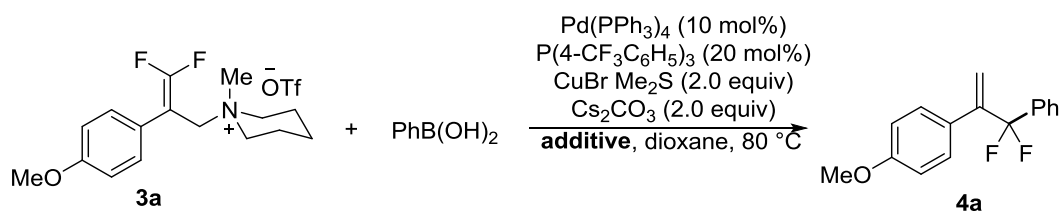

| entry | additive                   | yield (%) |
|-------|----------------------------|-----------|
| 1     | 3 Å (100 mg)               | 92        |
| 2     | 4 Å (100 mg)               | 77        |
| 3     | 5 Å (100 mg)               | 99        |
| 4     | H <sub>2</sub> O (20 μL)   | trace     |
| 5     | 1-methyl-piperidin (2 eq.) | 70        |

**Proposed reaction mechanism.**

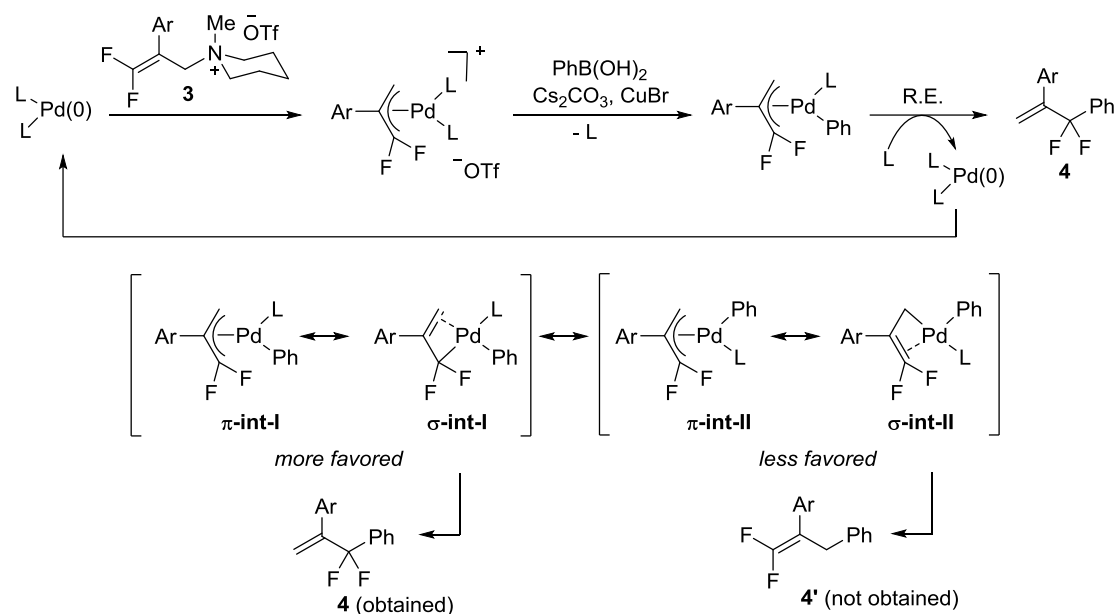

The reaction mechanism of the final step is similar with the work of Zhang (*J. Am. Chem. Soc.* 2014, 136, 1230), however, the exact reason for the high selectivity with respect to reductive elimination of allyl aryl palladium complex is not very clear at this stage. We surmise that the larger trans-effect of phosphine ligand than that of phenyl substituent would make the



$\pi$ -int-I and  $\sigma$ -int-I relative more stable compared with  $\pi$ -int-II and  $\sigma$ -int-II. Therefore, the reductive elimination from  $\sigma$ -int-I would guarantee the selective formation of the desired product.

### General procedure for the reaction

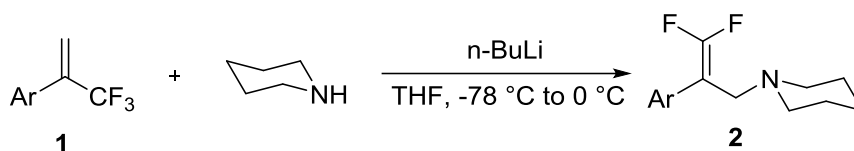

**Experiment procedure A<sup>[2]</sup>:** In a flame-dried flask equipped with a stirbar, rubber septum, and N<sub>2</sub> inlet needle were added piperidine (0.4888 g, 5.75 mol, 1.15 equiv) and anhydrous THF (50 mL, 0.10 M in the olefin). The flask was cooled to  $-78\text{ }^\circ\text{C}$  via a dry ice/acetone bath and, after cooling for 10 min, a 2.5 M solution of n-BuLi (2.3 mL, 5.75 mmol, 1.15 equiv) in hexanes was added dropwise to the flask over 5 min. The solution was stirred at  $-78\text{ }^\circ\text{C}$  for 1 h and gradually became cloudy and white. After this time, **1** (5 mmol, 1 equiv) was added to the flask dropwise over 5 min. The solution was stirred at  $-78\text{ }^\circ\text{C}$  for 1 h and after this time was warmed to  $0\text{ }^\circ\text{C}$  in an ice–water bath. The solution was stirred at  $0\text{ }^\circ\text{C}$  for 1 h and then was poured into a separatory funnel containing saturated aqueous NH<sub>4</sub>Cl (~100 mL). The biphasic mixture was diluted with EtOAc (~50mL) and the layers were separated. The aqueous layer was extracted with EtOAc (3  $\times$  20 mL) and the combined organic layers were washed with deionized water (~50 mL), followed by brine (~75 mL). The combined organic layers were dried (Na<sub>2</sub>SO<sub>4</sub>) and the solvent was removed under reduced

pressure. The resultant crude product material was purified by flash chromatography using the appropriate gradient of petroleum ether and ethyl acetate.

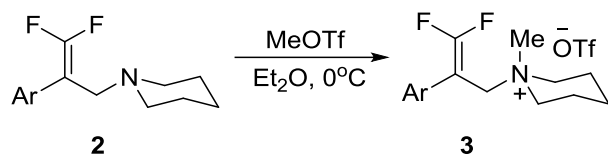

**Experiment procedure B:** To a Schlenk tube equipped with a magnetic stir bar were added **2** (3 mmol 1 equiv) and Et<sub>2</sub>O (3 ml). The flask was cooled to 0 °C via an ice–water bath, after cooling for 5 min, the MeOTf (0.6396 g, 3.9 mmol, 1.3 equiv) was added dropwise to the flask over 5 min. The solution was stirred at 0 °C for 30 min and gradually became cloudy and white. The solution was filtrated and washed with Et<sub>2</sub>O (3 × 10 mL). The pure products **3** were got.

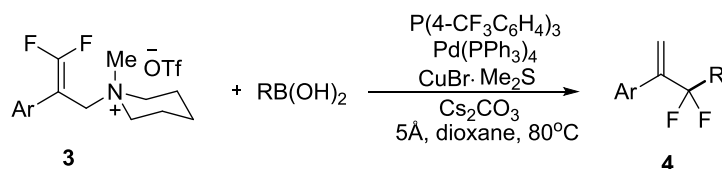

**Experiment procedure C:** To a Schlenk tube equipped with a magnetic stir bar were added aqueous Cs<sub>2</sub>CO<sub>3</sub> (65.2 mg, 2 equiv), Pd(PPh<sub>3</sub>)<sub>4</sub> (1.2 mg, 1 mol%), P(4-CF<sub>3</sub>C<sub>6</sub>H<sub>4</sub>)<sub>3</sub> (0.9 mg, 2 mol%), CuBr·Me<sub>2</sub>S (41.2 mg, 2 equiv), 5Å molecular sieve (100 mg), arylboronic acid (0.2 mmol, 2 equiv), **3** (0.1 mmol, 1 equiv) and 1,4-dioxane (1mL). The resulting solution was stirred at 80 °C for 20 h. After the reaction mixture was cooled to room temperature, the reaction mixture was quenched with saturated aqueous NH<sub>4</sub>Cl, and extracted with EtOAc (3×20 mL). The combined organic

layers were dried ( $\text{Na}_2\text{SO}_4$ ) and the solvent was removed under reduced pressure. The resultant crude product material was purified by flash chromatography using the appropriate gradient of petroleum ether and ethyl acetate.

### Gram-scale reaction

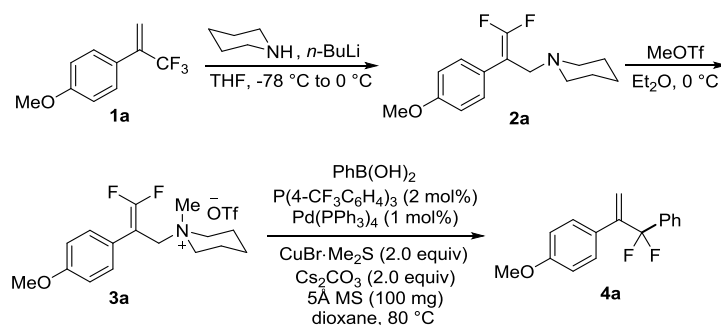

**Experiment procedure:** 1) In a flame-dried flask equipped with a stirbar, rubber septum, and  $\text{N}_2$  inlet needle were added piperidine (1.955 g, 23 mol, 1.15 equiv) and anhydrous THF (100 mL, 0.2 M in the olefin). The flask was cooled to  $-78\text{ }^\circ\text{C}$  via a dry ice/acetone bath and, after cooling for 10 min, a 2.5 M solution of *n*-BuLi (9.2 mL, 23 mmol, 1.15 equiv) in hexanes was added dropwise to the flask over 5 min. The solution was stirred at  $-78\text{ }^\circ\text{C}$  for 1 h and gradually became cloudy and white. After this time, **1a** (20 mmol, 1 equiv) was added to the flask dropwise over 5 min. The solution was stirred at  $-78\text{ }^\circ\text{C}$  for 1 h and after this time was warmed to  $0\text{ }^\circ\text{C}$  in an ice–water bath. The solution was stirred at  $0\text{ }^\circ\text{C}$  for 1 h and then was poured into a separatory funnel containing saturated aqueous  $\text{NH}_4\text{Cl}$  ( $\sim 200\text{ mL}$ ). The biphasic mixture was diluted with EtOAc ( $\sim 100\text{ mL}$ ) and the layers were separated. The aqueous layer was extracted with EtOAc (3

× 50 mL) and the combined organic layers were washed with deionized water (~100 mL), followed by brine (~150 mL). The combined organic layers were dried (Na<sub>2</sub>SO<sub>4</sub>) and the solvent was removed under reduced pressure. The resultant crude product material was purified by flash chromatography to give the pure **2a** (3.204 g, 60% yield)

2) To a Schlenk tube equipped with a magnetic stir bar were added **2a** (12 mmol 1 equiv) and Et<sub>2</sub>O (12 ml). The flask was cooled to 0 °C via an ice–water bath, after cooling for 5 min, the MeOTf (2.558 g, 15.6 mmol, 1.3 equiv) was added dropwise to the flask over 5 min. The solution was stirred at 0 °C for 30 min and gradually became cloudy and white. The solution was filtrated and washed with Et<sub>2</sub>O (3 × 50 mL). The pure products **3a** were got in 99% yield (5.126 g).

3) To a Schlenk tube equipped with a magnetic stir bar were added aqueous Cs<sub>2</sub>CO<sub>3</sub> (7.824 g, 24 mmol, 2 equiv), Pd(PPh<sub>3</sub>)<sub>4</sub> (0.139g, 0.12 mmol, 1 mol%), P(4-CF<sub>3</sub>C<sub>6</sub>H<sub>4</sub>)<sub>3</sub> (12.000 g, 0.24 mmol, 2 mol%), CuBr·Me<sub>2</sub>S (4.944 g, 24 mmol, 2 equiv), 5Å molecular sieve (1.200 g), phenylboronic acid (2.928 g, 24 mmol, 2 equiv), **3a** (11.9 mmol, 1 equiv) and 1,4-dioxane (120 mL). The resulting solution was stirred at 80 °C for 20 h. After the reaction mixture was cooled to room temperature, the reaction mixture was quenched with saturated aqueous NH<sub>4</sub>Cl, and extracted with EtOAc (3×100 mL). The combined organic layers were dried (Na<sub>2</sub>SO<sub>4</sub>) and the solvent was removed under reduced pressure. The resultant crude product

material was purified by flash chromatography to give the pure **4a** (2.869 g, 93% yield).

### Synthetic transformation of *gem*-difluoroallylarene **4a**

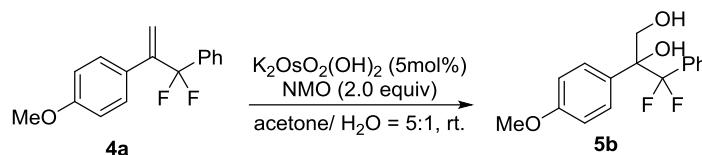

**Experiment procedure E:** In a 10 mL one-neck round-bottom flask were added **4a** (26.0 mg, 0.1 mmol, 1 equiv), acetone (1 mL), and deionized water (0.2 mL). The flask was cooled to 0 °C in an ice bath. After cooling for 10 min, 50% w/w NMO in  $\text{H}_2\text{O}$  (46.8 mg, 0.2 mmol, 2 equiv) was added to the flask followed by  $\text{K}_2\text{Os}_2(\text{OH})_2$  (Caution! Toxic!) (8.8 mg, 0.01 mmol, 0.1 equiv). Five minutes after this addition, the ice bath was removed and the solution was stirred at room temperature overnight. After 24 h, the reaction appeared to have stalled and an additional loading of NMO (46.8 g, 0.2 mmol, 2 equiv) and  $\text{K}_2\text{Os}_2(\text{OH})_2$  (8.8 mg, 0.01 mmol, 0.1 equiv) was added. The reaction mixture was stirred for an additional 24 h and after this time was judged to be complete. The solution was transferred to a separatory funnel and diluted with deionized water (~100 mL) and EtOAc (~10 mL). The phases were separated, and the aqueous layer was extracted with EtOAc (3 × 10 mL). The combined organic layers were washed with brine (~15 mL) and dried with  $\text{Na}_2\text{SO}_4$ . The solvent was removed in vacuo to give the crude diol as a thick, dark brown oil. The resultant crude product material was purified by flash chromatography to

give pure product **5b** (48% yield).

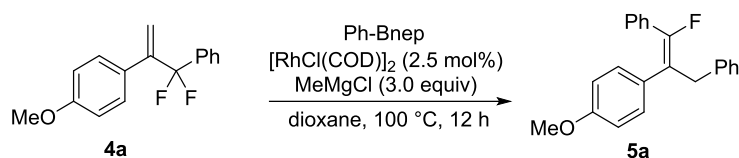

**Experiment procedure D:** To a Schlenk tube equipped with a magnetic stir bar were added **4a** (26.0 mg, 0.1 mmol, 1 equiv), Ph-Bnep (57.0 mg, 0.3 mmol, 3 equiv), [RhCl(COD)]<sub>2</sub> (1.2 Mg, 0.025 mmol, 2.5 mol%), MeMgCl (0.3 mL, 0.3 mmol, 3 equiv) and 1,4-dioxane (1 mL). The resulting solution was stirred at 100 °C for 12 h. After the reaction mixture was cooled to room temperature, the reaction mixture was quenched with saturated aqueous NH<sub>4</sub>Cl, and extracted with EtOAc (3 × 10 mL). The combined organic layers were dried (Na<sub>2</sub>SO<sub>4</sub>) and the solvent was removed under reduced pressure. The resultant crude product material was purified by flash chromatography to give the pure **5b** (15.7g, 48% yield).

### Synthesis of **4a** by one-pot reaction

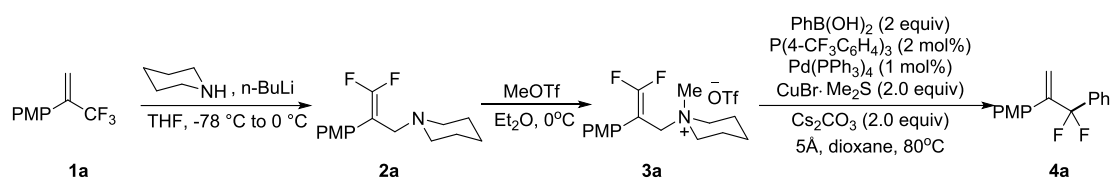

**Experiment procedure:** In a flame-dried flask equipped with a stirbar, rubber septum, and N<sub>2</sub> inlet needle were added piperidine (97.8 mg, 1.15 mol, 1.15 equiv) and anhydrous THF (10 mL, 0.2 M in the olefin). The flask was cooled to -78 °C via a dry ice/acetone bath and, after cooling for 10 min, a 2.5 M solution of n-BuLi (0.46 mL, 1.15 mmol, 1.15 equiv) in hexanes was added dropwise to the flask over 5 min. The solution was

stirred at  $-78\text{ }^{\circ}\text{C}$  for 1 h and gradually became cloudy and white. After this time, **1a** (202.0 mg, 1 mmol, 1 equiv) was added to the flask dropwise over 5 min. The solution was stirred at  $-78\text{ }^{\circ}\text{C}$  for 1 h and after this time was warmed to  $0\text{ }^{\circ}\text{C}$  in an ice–water bath. The solution was stirred at  $0\text{ }^{\circ}\text{C}$  for 1 h and then was poured into a separatory funnel containing saturated aqueous  $\text{NH}_4\text{Cl}$  ( $\sim 20\text{ mL}$ ). The biphasic mixture was diluted with EtOAc ( $\sim 10\text{ mL}$ ) and the layers were separated. The aqueous layer was extracted with EtOAc ( $3 \times 10\text{ mL}$ ) and the combined organic layers were washed with deionized water ( $\sim 10\text{ mL}$ ), followed by brine ( $\sim 15\text{ mL}$ ). The combined organic layers were dried ( $\text{Na}_2\text{SO}_4$ ) and the solvent was removed under reduced pressure. 2) To a Schlenk tube equipped with a magnetic stir bar were added crud product **2a** (1 equiv) and  $\text{Et}_2\text{O}$  (1 ml). The flask was cooled to  $0\text{ }^{\circ}\text{C}$  via an ice–water bath, after cooling for 5 min, the MeOTf (213.2 mg, 1.3 mmol, 1.3 equiv) was added dropwise to the flask over 5 min. The solution was stirred at  $0\text{ }^{\circ}\text{C}$  for 30 min and gradually became cloudy and white. The solution was removed under reduced pressure. 3) To a Schlenk tube equipped with a magnetic stir bar were added aqueous  $\text{Cs}_2\text{CO}_3$  (652.0 mg, 2 mmol, 2 equiv),  $\text{Pd}(\text{PPh}_3)_4$  (11.6 mg, 0.01 mmol, 1 mol%),  $\text{P}(4\text{-CF}_3\text{C}_6\text{H}_4)_3$  (11.2 mg, 0.024 mmol, 2 mol%),  $\text{CuBr}\cdot\text{Me}_2\text{S}$  (412.0 mg, 2 mmol, 2 equiv),  $5\text{\AA}$  molecular sieve (1.000 g), phenylboronic acid (244.0 mg, 2 mmol, 2 equiv), **3a** (1 equiv) and 1,4-dioxane (10 mL). The resulting solution was stirred at  $80\text{ }^{\circ}\text{C}$  for 20 h. After the reaction mixture

was cooled to room temperature, the reaction mixture was quenched with saturated aqueous  $\text{NH}_4\text{Cl}$ , and extracted with EtOAc ( $3 \times 100$  mL). The combined organic layers were dried ( $\text{Na}_2\text{SO}_4$ ) and the solvent was removed under reduced pressure. The resultant crude product material was purified by flash chromatography to give the pure **4a** (110.0 mg, 42% yield).

### Characterization of structurally novel compounds

#### 1-(tert-butyl)-4-(3,3,3-trifluoroprop-1-en-2-yl)benzene

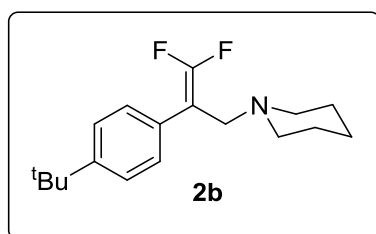

Following the experiment procedure **A**, **2b** was obtained in 64% yield.

**$^1\text{H}$  NMR (400 MHz,  $\text{CDCl}_3$ ):**  $\delta$  7.47 (d,  $J = 1.6$  Hz, 2H), 7.37 (d,  $J = 8.4$  Hz, 2H), 3.24 (dd,  $J = 1.8, 3.0$  Hz, 2H), 2.40 (s, 4H), 1.58-1.52 (m, 4H), 1.44-1.39 (m, 2H), 1.33 (s, 9H) ppm;  **$^{19}\text{F}$  NMR (376 MHz,  $\text{CDCl}_3$ ):**  $\delta$  -88.76 (d,  $J = 36.50$  Hz, 1F), -88.92 (d,  $J = 36.77$  Hz, 1F) ppm;  **$^{13}\text{C}$  NMR (100 MHz,  $\text{CDCl}_3$ ):**  $\delta$  24.5, 26.1, 31.4, 34.6, 54.1, 56.3, 89.4 (dd,  $J = 11.8, 17.9$  Hz), 125.3, 128.1, 131.3, 150.1, 155.3 (dd,  $J = 288.1, 291.8$  Hz) ppm; **HRMS (ESI,  $m/z$ ):** calculated for  $[\text{M}+\text{H}]^+$ : 294.2033, found: 294.2033.

#### 1-(3,3-difluoro-2-(p-tolyl)allyl)piperidine

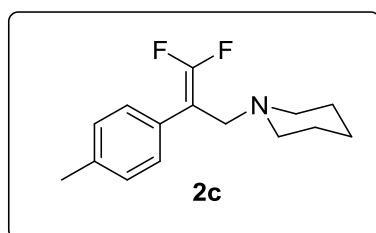



Following the experiment procedure **A**, **2c** was obtained in 59% yield.

**<sup>1</sup>H NMR (400 MHz, CDCl<sub>3</sub>):**  $\delta$  7.39 (d,  $J$  = 6.9 Hz, 2H), 7.16 (d,  $J$  = 8.0 Hz, 2H), 3.26 (dd,  $J$  = 1.7, 3.0 Hz, 2H), 2.39 (s, 4H), 2.36 (s, 3 H), 1.57-1.51 (m, 4H), 1.43-1.38 (m, 2H) ppm; **<sup>19</sup>F NMR (376 MHz, CDCl<sub>3</sub>):**  $\delta$  -89.18 (d,  $J$  = 37.71 Hz, 1F), -89.40 (d,  $J$  = 37.71 Hz, 1F) ppm; **<sup>13</sup>C NMR (100 MHz, CDCl<sub>3</sub>):**  $\delta$  21.2, 24.3, 26.0, 54.0, 56.2 (d,  $J$  = 3.7 Hz), 89.5 (dd,  $J$  = 11.7, 18.3 Hz), 128.2 (t,  $J$  = 3.5 Hz), 129.0, 131.2 (t,  $J$  = 3.3 Hz), 136.9, 155.1 (dd,  $J$  = 287.4, 291.0 Hz) ppm; **HRMS (ESI, m/z):** calculated for [M+H]<sup>+</sup>: 252.1564, found: 252.1563.

#### 4-(3,3,3-trifluoroprop-1-en-2-yl)-1,1'-biphenyl

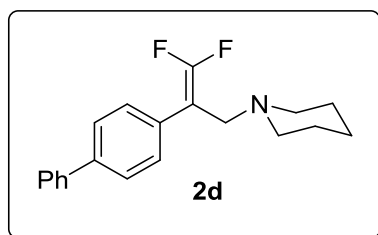

Following the experiment procedure **A**, **2d** was obtained in 80% yield.

**<sup>1</sup>H NMR (400 MHz, CDCl<sub>3</sub>):**  $\delta$  7.63-7.59 (m, 6 H), 7.45 (t,  $J$  = 7.4 Hz, 2H), 7.35 (d,  $J$  = 7.0 Hz, 2H), 3.30-3.29 (m, 2H), 2.42 (s, 4H), 2.36 (s, 3 H), 1.58-1.53 (m, 4H), 1.45-1.39 (m, 2H) ppm; **<sup>19</sup>F NMR (376 MHz, CDCl<sub>3</sub>):**  $\delta$  -88.14 (d,  $J$  = 35.32 Hz, 1F), -88.29 (d,  $J$  = 35.87 Hz, 1F) ppm; **<sup>13</sup>C NMR (100 MHz, CDCl<sub>3</sub>):**  $\delta$  24.4, 26.0, 54.0, 56.1 (d,  $J$  = 3.6 Hz), 89.4 (dd,  $J$  = 11.8, 18.0 Hz), 126.9, 127.0, 127.3, 128.7 (t,  $J$  = 3.4 Hz), 128.8, 133.2 (t,  $J$  = 2.9 Hz), 139.9, 140.7, 155.3 (dd,  $J$  = 288.2, 291.4 Hz) ppm; **HRMS (ESI, m/z):** calculated for [M+H]<sup>+</sup>: 314.1720, found: 314.1718.

### 1-(2-(4-chlorophenyl)-3,3-difluoroallyl)piperidine

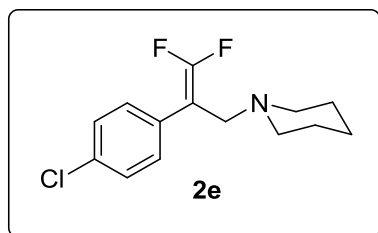

Following the experiment procedure **A**, **2e** was obtained in 70% yield.

**<sup>1</sup>H NMR (400 MHz, CDCl<sub>3</sub>):** δ 7.46 (dd, *J* = 1.3, 8.5 Hz, 2H), 7.31 (d, *J* = 8.6 Hz, 2H), 3.22 (dd, *J* = 1.7, 3.2 Hz, 2H), 2.38 (s, 4H), 1.56-1.51 (m, 4H), 1.44-1.39 (m, 2H) ppm; **<sup>19</sup>F NMR (376 MHz, CDCl<sub>3</sub>):** δ -87.96 (d, *J* = 35.04 Hz, 1F), -88.30 (d, *J* = 35.50 Hz, 1F) ppm; **<sup>13</sup>C NMR (100 MHz, CDCl<sub>3</sub>):** δ 24.3, 26.0, 54.0, 56.0 (d, *J* = 3.6 Hz), 89.0 (dd, *J* = 11.0, 19.1 Hz), 128.4, 129.7 (t, *J* = 3.5 Hz), 132.6 (t, *J* = 3.6 Hz), 133.0, 155.1 (dd, *J* = 288.1, 291.9 Hz) ppm; **HRMS (ESI, m/z):** calculated for [M+H]<sup>+</sup>: 272.1018, found: 272.1016.

### 1-(3,3-difluoro-2-(3-methoxyphenyl)allyl)piperidine

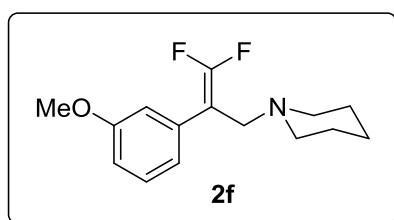

Following the experiment procedure **A**, **2f** was obtained in 46% yield.

**<sup>1</sup>H NMR (400 MHz, CDCl<sub>3</sub>):** δ 7.25 (t, *J* = 8.0 Hz, 1H), 7.16 (s, 2H), 7.07 (dd, *J* = 1.4, 7.9 Hz, 1H), 6.81 (dd, *J* = 1.7, 8.2 Hz, 1H), 3.81 (s, 3H), 3.24 (dd, *J* = 1.7, 3.1 Hz, 2H), 2.39 (s, 4H), 1.56-1.51 (m, 4H), 1.43-1.37 (m, 2H) ppm; **<sup>19</sup>F NMR (376 MHz, CDCl<sub>3</sub>):** δ -88.11 (d, *J* = 35.57 Hz, 1F), -

88.69 (d,  $J = 35.55$  Hz, 1F) ppm;  **$^{13}\text{C}$  NMR (100 MHz,  $\text{CDCl}_3$ ):**  $\delta$  24.3, 26.0, 53.9, 55.2, 56.2 (d,  $J = 4.1$  Hz), 89.6 (dd,  $J = 10.9, 19.0$  Hz), 122.7, 114.2 (t,  $J = 3.5$  Hz), 120.8 (t,  $J = 3.0$  Hz), 129.1, 135.7 (t,  $J = 3.6$  Hz), 155.2 (dd,  $J = 287.4, 291.9$  Hz), 159.4 ppm; **HRMS (ESI,  $m/z$ ):** calculated for  $[\text{M}+\text{H}]^+$ : 268.1513, found: 268.1514.

### 1-(2-([1,1'-biphenyl]-3-yl)-3,3-difluoroallyl)piperidine

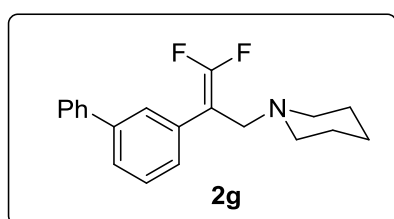

Following the experiment procedure A, **2g** was obtained in 53% yield.

**$^1\text{H}$  NMR (400 MHz,  $\text{CDCl}_3$ ):**  $\delta$  7.78 (s, 1H), 7.60 (d,  $J = 7.0$  Hz, 2H), 7.16 (s, 2H), 7.51-7.41 (m, 5H), 7.37 (q,  $J = 7.1, 14.6$  Hz, 1H), 3.30 (s, 2H), 2.42 (s, 4H), 1.57-1.52 (m, 4H), 1.47-1.38 (m, 2H) ppm;  **$^{19}\text{F}$  NMR (376 MHz,  $\text{CDCl}_3$ ):**  $\delta$  -88.36 (d,  $J = 35.81$  Hz, 1F), -88.70 (d,  $J = 36.53$  Hz, 1F) ppm;  **$^{13}\text{C}$  NMR (100 MHz,  $\text{CDCl}_3$ ):**  $\delta$  24.3, 26.0, 54.0, 56.2 (d,  $J = 4.2$  Hz), 89.7 (dd,  $J = 8.7, 17.2$  Hz), 126.0, 127.2, 127.3 (t,  $J = 3.4$  Hz), 128.6, 128.8, 134.5, 134.7, 141.1, 155.3 (dd,  $J = 287.3, 291.8$  Hz) ppm; **HRMS (ESI,  $m/z$ ):** calculated for  $[\text{M}+\text{H}]^+$ : 314.1720, found: 314.1722.

### 1-(3,3-difluoro-2-(3-(trifluoromethoxy)phenyl)allyl)piperidine

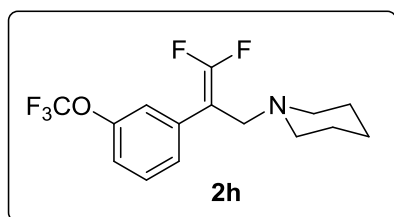

Following the experiment procedure **A**, **2h** was obtained in 48% yield.

**<sup>1</sup>H NMR (400 MHz, CDCl<sub>3</sub>):** δ 7.53 (s, 1H), 7.45 (dd, *J* = 1.2, 8.0 Hz, 1H), 7.35 (t, *J* = 7.8 Hz, 1H), 7.11 (dt, *J* = 1.0, 8.0 Hz, 1H), 3.22 (dd, *J* = 1.7, 2.9 Hz, 2H), 2.40 (s, 4H), 1.58-1.52 (m, 4H), 1.45-1.40 (m, 2H) ppm; **<sup>19</sup>F NMR (376 MHz, CDCl<sub>3</sub>):** δ -57.82, -87.12 (d, *J* = 32.72 Hz, 1F), -87.64 (d, *J* = 30.42 Hz, 1F) ppm; **<sup>13</sup>C NMR (100 MHz, CDCl<sub>3</sub>):** δ 24.3, 25.9, 53.9, 56.0 (d, *J* = 3.9 Hz), 88.9 (dd, *J* = 10.7, 19.8 Hz), 119.5, 120.5 (q, *J* = 255.4, 511.2 Hz), 121.0 (t, *J* = 3.7 Hz), 126.7 (q, *J* = 2.7, 4.4 Hz), 129.4, 136.2 (t, *J* = 3.9 Hz), 149.2, 155.3 (dd, *J* = 288.3, 292.8 Hz) ppm; **HRMS (ESI, m/z):** calculated for [M+H]<sup>+</sup>: 322.1230, found: 322.1223.

#### 4-(1,1-difluoro-3-(piperidin-1-yl)prop-1-en-2-yl)-N,N-diphenylaniline

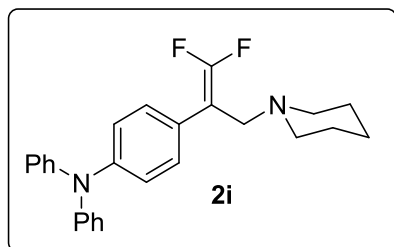

Following the experiment procedure **A**, **2i** was obtained in 64% yield

**<sup>1</sup>H NMR (400 MHz, CDCl<sub>3</sub>):** δ 7.47 (d, *J* = 7.7 Hz, 2H), 7.29 (t, *J* = 7.7 Hz, 4H), 7.16 (d, *J* = 7.6 Hz, 4H), 7.09-7.04 (m, 4H), 3.27 (s, 2H), 2.46 (s, 4H), 1.63-1.57 (m, 4H), 1.49-1.44 (m, 2H) ppm; **<sup>19</sup>F NMR (376 MHz, CDCl<sub>3</sub>):** δ -88.55 (d, *J* = 37.61 Hz, 1F), -88.96 (d, *J* = 37.15 Hz, 1F) ppm; **<sup>13</sup>C NMR (100 MHz, CDCl<sub>3</sub>):** δ 24.4, 26.1, 54.1, 56.3 (d, *J* = 3.9 Hz), 89.2 (dd, *J* = 11.1, 18.5 Hz), 123.0, 123.1, 124.6, 128.0 (t, *J* = 3.5 Hz), 129.1, (*J* = 3.5 Hz), 129.3, 146.7, 147.7, 155.2 (dd, *J* = 287.2, 291.8 Hz) ppm;

**HRMS (ESI, m/z):** calculated for  $[M+H]^+$ : 405.2142, found: 405.2137.

**1-(3,3-difluoro-2-(4-fluoro-3-methoxyphenyl)allyl)piperidine**

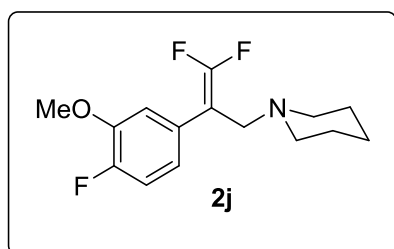

Following the experiment procedure **A**, **2j** was obtained in 68% yield

**$^1\text{H}$  NMR (400 MHz,  $\text{CDCl}_3$ ):**  $\delta$  7.36 (d,  $J = 8.4$  Hz, 1H), 7.02 (d,  $J = 8.1$  Hz, 2H), 3.88 (s, 3H), 3.19 (dd,  $J = 1.6, 3.1$  Hz, 2H), 2.41 (s, 4H), 1.58-1.53 (m, 4H), 1.46-1.40 (m, 2H) ppm;  **$^{19}\text{F}$  NMR (376 MHz,  $\text{CDCl}_3$ ):**  $\delta$  -88.49 (d,  $J = 37.06$  Hz, 1F), -89.34 (d,  $J = 36.46$  Hz, 1F), 136.93 (dd,  $J = 8.22, 15.89$  Hz) ppm;  **$^{13}\text{C}$  NMR (100 MHz,  $\text{CDCl}_3$ ):**  $\delta$  24.3, 26.1, 53.9, 56.0, 56.4 (d,  $J = 4.1$  Hz), 89.0 (dd,  $J = 11.4, 19.4$  Hz), 113.9 (q,  $J = 2.6, 4.7$  Hz), 115.5 (d,  $J = 18.2$  Hz), 121.0-120.9 (m), 130.5 (q,  $J = 4.0, 7.7$  Hz), 147.2 ( $J = 10.9$  Hz), 151.5 (d,  $J = 244.9$  Hz), 155.2 (dd,  $J = 287.2, 290.7$  Hz) ppm; **HRMS (ESI, m/z):** calculated for  $[M+H]^+$ : 286.1419, found: 286.1414.

**1-(3,3-difluoro-2-(4-methoxy-3-(trifluoromethyl)phenyl)allyl)**

**piperidine**

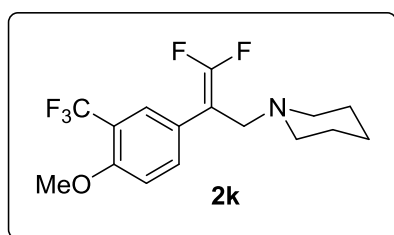

Following the experiment procedure **A**, **2k** was obtained in 56% yield

**<sup>1</sup>H NMR (400 MHz, CDCl<sub>3</sub>):** δ 7.83 (d, *J* = 1.5 Hz, 1H), 7.65 (d, *J* = 8.7 Hz, 1H), 6.99 (d, *J* = 8.4 Hz, 1H), 3.91 (s, 3H), 3.20 (dd, *J* = 1.8, 3.2 Hz, 2H), 2.40 (s, 4H), 1.58-1.53 (m, 4H), 1.45-1.40 (m, 2H) ppm; **<sup>19</sup>F NMR (376 MHz, CDCl<sub>3</sub>):** δ -62.50, -88.79 (d, *J* = 37.18 Hz, 1F), -89.26 (d, *J* = 36.96 Hz, 1F) ppm; **<sup>13</sup>C NMR (100 MHz, CDCl<sub>3</sub>):** δ 24.3, 26.0, 54.0, 55.9, 56.1 (d, *J* = 3.8 Hz), 88.5 (dd, *J* = 11.5, 19.6 Hz), 111.7, 118.4 (q, *J* = 30.5, 61.0 Hz), 123.7 (q, *J* = 271.0, 541.7 Hz), 126.0 (t, *J* = 3.7 Hz), 127.4-127.2 (m), 133.2, 155.2 (dd, *J* = 287.9, 291.5 Hz), 156.5 ppm. **HRMS (ESI, m/z):** calculated for [M+H]<sup>+</sup>: 336.1387, found: 336.1382.

### 1-(3,3-difluoro-2-(3,4,5-trimethoxyphenyl)allyl)piperidine

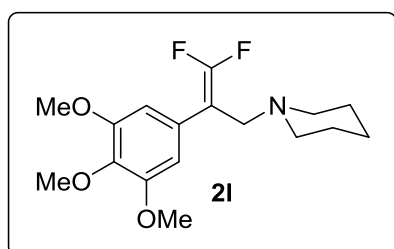

Following the experiment procedure **A**, **2I** was obtained in 48% yield

**<sup>1</sup>H NMR (400 MHz, CDCl<sub>3</sub>):** δ 6.89 (s, 2H), 3.84 (s, 9H), 3.17 (dd, *J* = 1.3, 3.1 Hz, 2H), 2.41 (s, 4H), 1.57-1.52 (m, 4H), 1.44-1.39 (m, 2H) ppm; **<sup>19</sup>F NMR (376 MHz, CDCl<sub>3</sub>):** δ -88.13 (d, *J* = 37.26 Hz, 1F), -89.37 (d, *J* = 37.30 Hz, 1F) ppm; **<sup>13</sup>C NMR (100 MHz, CDCl<sub>3</sub>):** δ 24.4, 26.2, 53.9, 56.0, 56.5 (d, *J* = 4.2 Hz), 60.8, 89.4 (dd, *J* = 11.0, 19.0 Hz), 105.7 (t, *J* = 3.6 Hz), 129.8 (t, *J* = 3.7 Hz), 137.1, 152.8, 155.2 (dd, *J* = 287.3, 291.7 Hz) ppm; **HRMS (ESI, m/z):** calculated for [M+H]<sup>+</sup>: 328.1724, found: 328.1721.

### 1-(2-(benzofuran-5-yl)-3,3-difluoroallyl)piperidine

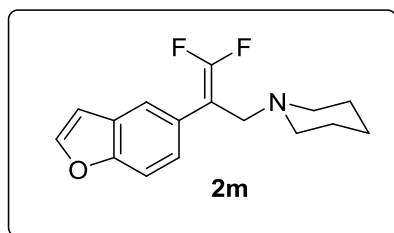

Following the experiment procedure **A**, **2m** was obtained in 64% yield

**<sup>1</sup>H NMR (400 MHz, CDCl<sub>3</sub>):**  $\delta$  7.76 (s, 1H), 7.63 (d,  $J = 2.1$  Hz, 1H), 7.48 (dd,  $J = 8.4, 20.9$  Hz, 2H), 6.78 (dd,  $J = 0.8, 2.2$  Hz, 1H), 3.33 (t,  $J = 2.3$  Hz, 2H), 2.44 (s, 4H), 1.60-1.55 (m, 4H), 1.46-1.41 (m, 2H) ppm; **<sup>19</sup>F NMR (376 MHz, CDCl<sub>3</sub>):**  $\delta$  -89.76 (d,  $J = 38.57$  Hz, 1F), -89.90 (d,  $J = 39.13$  Hz, 1F) ppm; **<sup>13</sup>C NMR (100 MHz, CDCl<sub>3</sub>):**  $\delta$  24.4, 26.0, 54.1, 56.8 (d,  $J = 3.0$  Hz), 89.9 (dd,  $J = 12.9, 18.2$  Hz), 106.7, 111.1, 121.3 (t,  $J = 3.3$  Hz), 125.0 (t,  $J = 2.9$  Hz), 127.5, 128.9 (t,  $J = 2.7$  Hz), 145.3, 154.2, 155.2 (dd,  $J = 287.3, 289.5$  Hz) ppm; **HRMS (ESI, m/z):** calculated for [M+H]<sup>+</sup>: 278.1356, found: 278.1355

### 1-(2-(2,3-dihydrobenzo[b][1,4]dioxin-6-yl)-3,3-difluoroallyl)

#### piperidine

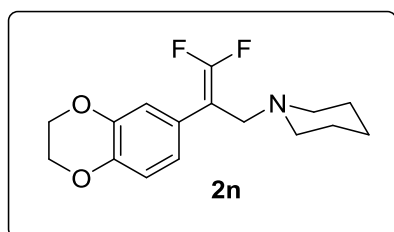

Following the experiment procedure **A**, **2n** was obtained in 63% yield

**<sup>1</sup>H NMR (400 MHz, CDCl<sub>3</sub>):**  $\delta$  7.07 (s, 1H), 6.98 (dt,  $J = 1.5, 9.9$  Hz, 1H), 6.83 (d,  $J = 8.2$  Hz, 1H), 4.26 (s, 4H), 3.20 (dd,  $J = 1.7, 3.1$  Hz, 2H), 2.38

(s, 4H), 1.57-1.51 (m, 4H), 1.43-1.37 (m, 2H) ppm; **<sup>19</sup>F NMR (376 MHz, CDCl<sub>3</sub>):** δ -89.02 (d, *J* = 38.04 Hz, 1F), -89.47 (d, *J* = 37.87 Hz, 1F) ppm; **<sup>13</sup>C NMR (100 MHz, CDCl<sub>3</sub>):** δ 24.4, 26.0, 54.0, 56.3 (d, *J* = 3.7 Hz), 64.3, 64.4, 89.0 (dd, *J* = 11.6, 19.4 Hz), 117.0, 117.3 (t, *J* = 3.6 Hz), 121.6 (t, *J* = 3.4 Hz), 127.4 (t, *J* = 3.6 Hz), 142.7, 143.1, 155.1 (dd, *J* = 286.7, 291.0 Hz) ppm; **HRMS (ESI, m/z):** calculated for [M+H]<sup>+</sup>: 296.1462, found: 296.1460.

**1-(3,3-difluoro-2-(4-methoxyphenyl)allyl)-1-methylpiperidin-1-ium trifluoromethanesulfonate**

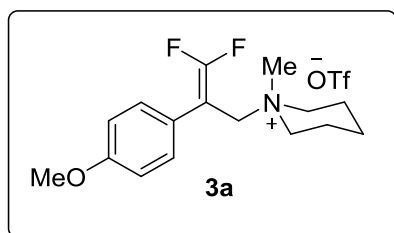

Following the experiment procedure **B**, **3a** was obtained in 97% yield

**<sup>1</sup>H NMR (400 MHz, CDCl<sub>3</sub>):** δ 7.40 (d, *J* = 7.4 Hz, 2H), 6.94 (d, *J* = 8.8 Hz, 2H), 4.49 (s, 2 H), 3.79 (s, 3H), 3.37-3.34 (m, 4H), 2.95 (s, 3H), 1.83-1.77 (m, 4H), 1.74-1.68 (m, 1H), 1.64-1.56 (m, 1H) ppm; **<sup>19</sup>F NMR (376 MHz, CDCl<sub>3</sub>):** δ -78.50, -79.41 (d, *J* = 14.63 Hz, 1F), -80.54 (d, *J* = 13.97 Hz, 1F) ppm; **<sup>13</sup>C NMR (100 MHz, CDCl<sub>3</sub>):** δ 20.0, 20.5, 47.5, 55.4, 61.3, 62.2, 84.4 (dd, *J* = 17.3, 20.4 Hz), 115.0, 120.7 (q, *J* = 318.6, 636.6 Hz), 122.4 (t, *J* = 2.8 Hz), 129.6 (t, *J* = 2.8 Hz), 157.2 (t, *J* = 296.6 Hz), 159.9 ppm. **HRMS (ESI, m/z):** calculated for [M-OTf]<sup>+</sup>: 282.1669, found: 282.1669.



**1-(2-(4-(tert-butyl)phenyl)-3,3-difluoroallyl)-1-methylpiperidin-1-ium  
trifluoromethanesulfonate**

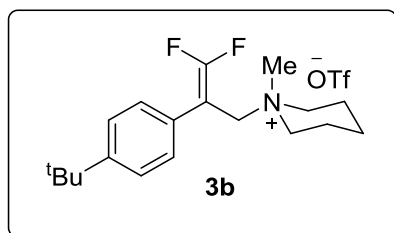

Following the experiment procedure **B**, **3b** was obtained in 98% yield

**<sup>1</sup>H NMR (400 MHz, CDCl<sub>3</sub>):**  $\delta$  7.43 (d,  $J$  = 8.4 Hz, 2H), 7.38 (d,  $J$  = 7.3 Hz, 2H), 4.53 (s, 2 H), 3.38 (t,  $J$  = 5.4 Hz, 4H), 2.95 (s, 3H), 1.84-1.78 (m, 4H), 1.76-1.70 (m, 1H), 1.66-1.58 (m, 1H), 1.29 (s, 9H) ppm; **<sup>19</sup>F NMR (376 MHz, CDCl<sub>3</sub>):**  $\delta$  -78.48, -78.56 (d,  $J$  = 12.87 Hz, 1F), -79.84 (d,  $J$  = 12.80 Hz, 1F) ppm; **<sup>13</sup>C NMR (100 MHz, CDCl<sub>3</sub>):**  $\delta$  20.0, 20.5, 31.2, 34.7, 47.7, 61.3, 62.0, 84.7 (dd,  $J$  = 16.8, 20.3 Hz), 120.7 (q,  $J$  = 318.0, 636.1 Hz), 126.5, 127.5 (t,  $J$  = 2.9 Hz), 127.9 (t,  $J$  = 2.8 Hz), 152.3, 157.3 (t,  $J$  = 297.3 Hz) ppm; **HRMS (ESI, m/z):** calculated for [M-OTf]<sup>+</sup>: 308.2190, found: 308.2188.

**1-(3,3-difluoro-2-(p-tolyl)allyl)-1-methylpiperidin-1-ium  
trifluoromethanesulfonate**

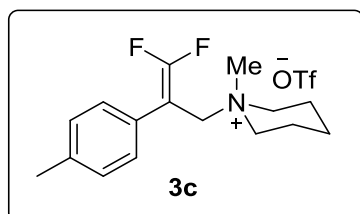

Following the experiment procedure **B**, **3c** was obtained in 95% yield

**<sup>1</sup>H NMR (400 MHz, CDCl<sub>3</sub>):**  $\delta$  7.34 (d,  $J$  = 7.1 Hz, 2H), 7.38 (d,  $J$  = 8.1

Hz, 2H), 4.51 (s, 2 H), 3.36 (t,  $J = 6.0$  Hz, 4H), 2.95 (s, 3H), 2.33 (s, 3H), 1.82-1.77 (m, 4H), 1.74-1.68 (m, 1H), 1.64-1.56 (m, 1H) ppm;  $^{19}\text{F}$  NMR (376 MHz,  $\text{CDCl}_3$ ):  $\delta$  -78.50, -78.81 (d,  $J = 12.54$  Hz, 1F), -80.00 (d,  $J = 12.61$  Hz, 1F) ppm;  $^{13}\text{C}$  NMR (100 MHz,  $\text{CDCl}_3$ ):  $\delta$  20.0, 20.5, 21.2, 47.6, 61.3, 62.0, 84.7 (dd,  $J = 16.9, 20.0$  Hz), 120.7 (q,  $J = 318.0, 636.6$  Hz), 127.6 (t,  $J = 2.8$  Hz), 128.2 (t,  $J = 2.3$  Hz), 130.2, 139.2, 157.3 (t,  $J = 297.2$  Hz) ppm; HRMS (ESI,  $m/z$ ): calculated for  $[\text{M-OTf}]^+$ : 266.1720, found: 266.1721.

**1-(2-([1,1'-biphenyl]-4-yl)-3,3-difluoroallyl)-1-methylpiperidin-1-ium trifluoromethanesulfonate**

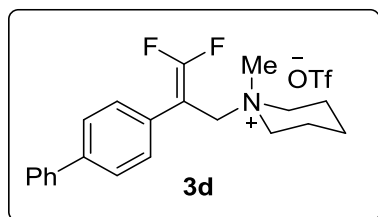

Following the experiment procedure **B**, **3d** was obtained in 93% yield

$^1\text{H}$  NMR (400 MHz,  $(\text{CD}_3)\text{SO}$ ):  $\delta$  7.78 (d,  $J = 8.5$  Hz, 2H), 7.74-7.70 (m, 4H), 7.48 (t,  $J = 7.3$  Hz, 2H), 7.39 (t,  $J = 7.0$  Hz, 1H), 4.53 (s, 2 H), 3.37-3.26 (m, 4H), 2.94 (s, 3H), 2.33 (s, 3H), 1.76-1.68 (m, 4H), 1.58-1.51 (m, 1H), 1.48-1.39 (m, 1H) ppm;  $^{19}\text{F}$  NMR (376 MHz,  $(\text{CD}_3)\text{SO}$ ):  $\delta$  -77.78, -78.74 (d,  $J = 14.24$  Hz, 1F), -80.52 (d,  $J = 14.41$  Hz, 1F) ppm;  $^{13}\text{C}$  NMR (100 MHz,  $(\text{CD}_3)\text{SO}$ ):  $\delta$  19.7, 20.9, 46.8, 60.5, 61.4, 84.9 (dd,  $J = 18.4, 18.7$  Hz), 121.2 (q,  $J = 320.2, 640.7$  Hz), 127.2, 127.4, 128.3, 129.5, 129.7, 131.3 (t,  $J = 3.1$  Hz), 139.6, 140.4, 157.2 (t,  $J = 294.0$  Hz) ppm; HRMS

(ESI,  $m/z$ ): calculated for  $[M-OTf]^+$ : 328.1877, found: 328.1874.

**1-(2-(4-chlorophenyl)-3,3-difluoroallyl)-1-methylpiperidin-1-ium  
trifluoromethanesulfonate**

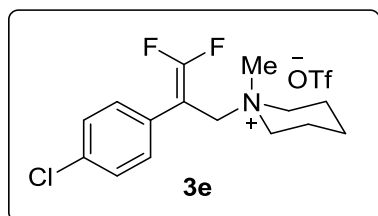

Following the experiment procedure **B**, **3e** was obtained in 97% yield

**$^1H$  NMR (400 MHz,  $CDCl_3$ ):**  $\delta$  7.48 (d,  $J = 6.9$  Hz, 2H), 7.39 (d,  $J = 8.4$  Hz, 2H), 4.53 (s, 2 H), 3.36 (t,  $J = 5.5$  Hz, 4H), 2.95 (s, 3H), 2.33 (s, 3H), 1.86-1.76 (m, 4H), 1.75-1.69 (m, 1H), 1.64-1.54 (m, 1H) ppm;  **$^{19}F$  NMR (376 MHz,  $CDCl_3$ ):**  $\delta$ -77.29 (d,  $J = 9.91$  Hz, 1F), -78.52 (d,  $J = 9.85$  Hz, 1F), -78.54 ppm;  **$^{13}C$  NMR (100 MHz,  $CDCl_3$ ):**  $\delta$  20.0, 20.5, 47.1, 61.3, 62.2, 84.1 (dd,  $J = 17.8, 19.3$  Hz), 120.7 (q,  $J = 318.1, 636.5$  Hz), 129.3 (t,  $J = 3.0$  Hz), 129.8, 129.9 (t,  $J = 2.8$  Hz), 135.0, 157.5 (t,  $J = 297.7$  Hz) ppm; **HRMS (ESI,  $m/z$ ):** calculated for  $[M-OTf]^+$ : 286.1774, found: 286.1778.

**1-(3,3-difluoro-2-(3-methoxyphenyl)allyl)-1-methylpiperidin-1-ium  
trifluoromethanesulfonate**

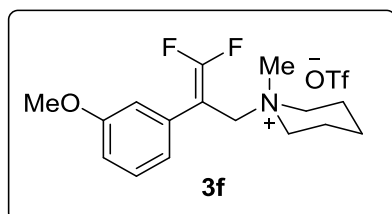

Following the experiment procedure **B**, **3f** was obtained in 99% yield

**$^1H$  NMR (400 MHz,  $CDCl_3$ ):**  $\delta$  7.33 (t,  $J = 8.0$  Hz, 1H), 7.02 (d,  $J = 7.9$

Hz, 2H), 6.99 (s, 1H), 6.88 (dd,  $J = 2.5, 8.3$  Hz, 1H), 4.51 (s, 2 H), 3.83 (s, 3H), 3.36 (t,  $J = 5.2$  Hz, 4H), 2.96 (s, 3H), 1.83-1.77 (m, 4H), 1.75-1.68 (m, 1H), 1.64-1.56 (m, 1H) ppm;  $^{19}\text{F}$  NMR (376 MHz,  $\text{CDCl}_3$ ):  $\delta$ -78.10 (d,  $J = 10.90$  Hz, 1F), -78.73 (d,  $J = 10.72$  Hz, 1F), -78.56 ppm;  $^{13}\text{C}$  NMR (100 MHz,  $\text{CDCl}_3$ ):  $\delta$  20.0, 20.5, 47.5, 55.5, 61.3, 62.1, 84.8 (dd,  $J = 17.5, 20.4$  Hz), 113.6 (t,  $J = 2.6$  Hz), 115.0, 120.5 (t,  $J = 1.8$  Hz), 120.7 (q,  $J = 317.8, 635.8$  Hz), 130.6, 132.0 (t,  $J = 2.3$  Hz), 157.4 (t,  $J = 297.3$  Hz), 160.3 ppm; HRMS (ESI,  $m/z$ ): calculated for  $[\text{M-OTf}]^+$ : 282.1669, found: 282.1665.

**1-(2-([1,1'-biphenyl]-3-yl)-3,3-difluoroallyl)-1-methylpiperidin-1-ium trifluoromethanesulfonate**

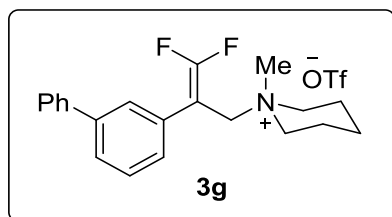

Following the experiment procedure **B**, **3g** was obtained in 98% yield

$^1\text{H}$  NMR (400 MHz,  $\text{CDCl}_3$ ):  $\delta$  7.65 (s, 1H), 7.62 (d,  $J = 7.7$  Hz, 2H), 7.57 (d,  $J = 7.2$  Hz, 1H), 7.50-7.41 (m, 4H), 7.33 (t,  $J = 7.3$  Hz, 1H), 4.51 (s, 2 H), 3.36 (t,  $J = 4.7$  Hz, 4H), 2.92 (s, 3H), 1.75-1.71 (m, 4H), 1.67-1.61 (m, 1H), 1.58-1.49 (m, 1H) ppm;  $^{19}\text{F}$  NMR (376 MHz,  $\text{CDCl}_3$ ):  $\delta$ -77.86 (d,  $J = 10.54$  Hz, 1F), -79.06 (d,  $J = 10.67$  Hz, 1F), -78.48 ppm;  $^{13}\text{C}$  NMR (100 MHz,  $\text{CDCl}_3$ ):  $\delta$  19.9, 20.4, 47.5, 61.3, 62.1, 84.8 (dd,  $J = 17.4, 20.1$  Hz), 120.7 (q,  $J = 318.1, 636.1$  Hz), 126.8 (t,  $J = 2.9$  Hz), 127.2, 127.7, 127.9,

129.0, 130.1, 131.5 (t,  $J = 2.9$  Hz), 139.7, 142.3, 157.5 (t,  $J = 297.0$  Hz) ppm. **HRMS (ESI, m/z):** calculated for [M-OTf]<sup>+</sup>: 328.1877, found: 328.1872.

**1-(3,3-difluoro-2-(3-(trifluoromethoxy)phenyl)allyl)-1-**

**methylpiperidin-1-ium**

**trifluoromethanesulfonate**

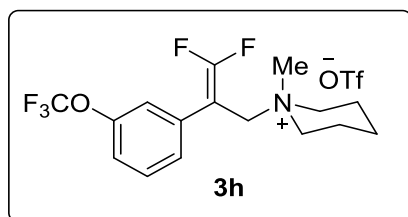

Following the experiment procedure **B**, **3h** was obtained in 94% yield

**<sup>1</sup>H NMR (400 MHz, CDCl<sub>3</sub>):**  $\delta$  7.53 (d,  $J = 7.6$  Hz, 1H), 7.48 (t,  $J = 8.0$  Hz, 1H), 7.35 (s, 1H), 7.22 (d,  $J = 7.9$  Hz, 1H), 4.56 (s, 2 H), 3.38 (t,  $J = 1.4$  Hz, 4H), 2.96 (s, 3H), 1.84-1.77 (m, 4H), 1.74-1.67 (m, 1H), 1.65-1.54 (m, 1H) ppm; **<sup>19</sup>F NMR (376 MHz, CDCl<sub>3</sub>):**  $\delta$  -57.97, -76.48 (d,  $J = 7.68$  Hz, 1F), -77.76 (d,  $J = 7.93$  Hz, 1F), -78.68 ppm; **<sup>13</sup>C NMR (100 MHz, CDCl<sub>3</sub>):**  $\delta$  20.0, 20.4, 47.3, 61.3, 61.9, 84.0 (t,  $J = 18.9$  Hz), 120.3 (q,  $J = 256.4, 513.0$  Hz), 120.7 (q,  $J = 318.1, 636.0$  Hz), 121.1, 121.3, 127.0, 131.2, 132.9 (t,  $J = 3.4$  Hz), 149.6 (d,  $J = 1.4$  Hz), 157.7 (t,  $J = 298.3$  Hz) ppm; **HRMS (ESI, m/z):** calculated for [M-OTf]<sup>+</sup>: 336.1387, found: 336.1378.

**1-(2-(4-(diphenylamino)phenyl)-3,3-difluoroallyl)-1-methylpiperidin-1-ium trifluoromethanesulfonate**

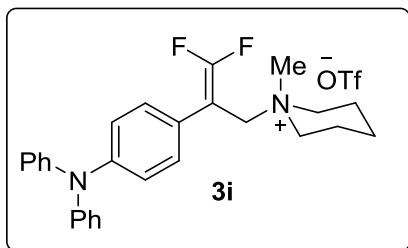

Following the experiment procedure **B**, **3i** was obtained in 85% yield

**<sup>1</sup>H NMR (400 MHz, CDCl<sub>3</sub>):** δ 7.30-7.25 (m, 6H), 7.07 (dd, *J* = 8.2, 18.4 Hz, 8H), 4.46 (s, 2 H), 3.39 (t, *J* = 5.6 Hz, 4H), 2.99 (s, 3H), 1.86-1.80 (m, 4H), 1.78-1.61 (m, 1H), 1.67-1.57 (m, 1H) ppm; **<sup>19</sup>F NMR (376 MHz, CDCl<sub>3</sub>):** δ -78.51, -78.99 (d, *J* = 13.69 Hz, 1F), -78.03 (d, *J* = 13.87 Hz, 1F) ppm; **<sup>13</sup>C NMR (100 MHz, CDCl<sub>3</sub>):** δ 20.0, 20.5, 47.8, 61.3, 61.8, 84.5 (dd, *J* = 17.0, 20.2 Hz), 120.6 (q, *J* = 318.0, 635.0 Hz), 122.2, 122.7, 123.9, 125.3, 129.0, 129.5, 146.9, 148.4, 157.3 (t, *J* = 297.1 Hz) ppm; **HRMS (ESI, m/z):** calculated for [M-OTf]<sup>+</sup>: 419.2299, found: 419.2292.

### 1-(3,3-difluoro-2-(4-fluoro-3-methoxyphenyl)allyl)-1-

methylpiperidin-1-ium

trifluoromethanesulfonate

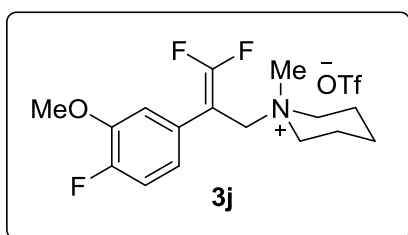

Following the experiment procedure **B**, **3j** was obtained in 93% yield

**<sup>1</sup>H NMR (400 MHz, CDCl<sub>3</sub>):** δ 7.19 (d, *J* = 7.5 Hz, 1H), 7.09 (dd, *J* = 8.3, 10.8 Hz, 1H), 7.00-6.96 (m, 1H), 4.52 (s, 2 H), 3.94 (s, 3H), 3.36 (t, *J* = 5.6 Hz, 4H), 2.96 (s, 3H), 1.84-1.79 (m, 4H), 1.76-1.70 (m, 1H), 1.65-1.54 (m, 1H) ppm; **<sup>19</sup>F NMR (376 MHz, CDCl<sub>3</sub>):** δ -78.26 (d, *J* = 11.90 Hz, 1F), -

78.73 (d,  $J = 11.13$  Hz, 1F), -78.59, -133.6- -133.7(m) ppm;  **$^{13}\text{C}$  NMR (100 MHz,  $\text{CDCl}_3$ ):**  $\delta$  20.0, 20.5, 47.1, 56.6, 61.3, 62.5, 84.4 (dd,  $J = 17.6, 20.0$  Hz), 113.6, 116.8 (d,  $J = 18.5$  Hz), 120.7 (q,  $J = 318.0, 636.2$  Hz), 120.9 (d,  $J = 6.6$  Hz), 127.1 (d,  $J = 3.4$  Hz), 148.6 (d,  $J = 10.9$  Hz), 148.6 (d,  $J = 10.9$  Hz), 152.3 (d,  $J = 248.0$  Hz), 157.5 (t,  $J = 297.2$  Hz) ppm; **HRMS (ESI,  $m/z$ ):** calculated for  $[\text{M-OTf}]^+$ : 300.1575, found: 300.1571.

**1-(3,3-difluoro-2-(4-methoxy-3-(trifluoromethyl)phenyl)allyl)-1-**

**methylpiperidin-1-ium**

**trifluoromethanesulfonate**

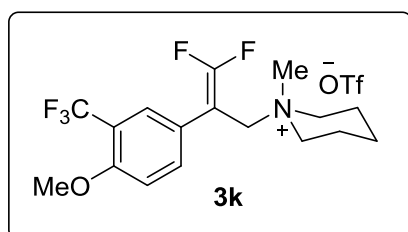

Following the experiment procedure **B**, **3k** was obtained in 95% yield

**$^1\text{H}$  NMR (400 MHz,  $\text{CDCl}_3$ ):**  $\delta$  7.78 (dd,  $J = 2.2, 8.6$  Hz, 1H), 7.61 (s, 1H), 7.12 (d,  $J = 8.9$  Hz, 1H), 4.53 (s, 2 H), 3.90 (s, 3H), 3.37 (t,  $J = 5.6$  Hz, 4H), 2.96 (s, 3H), 1.85-1.79 (m, 4H), 1.76-1.70 (m, 1H), 1.65-1.55 (m, 1H) ppm;  **$^{19}\text{F}$  NMR (376 MHz,  $\text{CDCl}_3$ ):**  $\delta$  -62.59, -77.79 (d,  $J = 10.99$  Hz, 1F), -78.17 (d,  $J = 10.88$  Hz, 1F), -78.61 ppm;  **$^{13}\text{C}$  NMR (100 MHz,  $\text{CDCl}_3$ ):**  $\delta$  20.0, 20.5, 47.1, 56.1, 61.3, 62.3, 83.7 (t,  $J = 19.3$  Hz), 113.3, 119.3 (d,  $J = 30.9$  Hz), 120.7 (q,  $J = 318.4, 636.5$  Hz), 122.3 (t,  $J = 3.1$  Hz), 123.1 (q,  $J = 271.4, 542.3$  Hz), 126.9 (d,  $J = 3.2$  Hz), 133.8, 157.6 (t,  $J = 297.5$  Hz), 157.7 ppm; **HRMS (ESI,  $m/z$ ):** calculated for  $[\text{M-OTf}]^+$ : 350.1543, found: 350.1541.

**1-(3,3-difluoro-2-(3,4,5-trimethoxyphenyl)allyl)-1-methylpiperidin-1-ium trifluoromethanesulfonate**

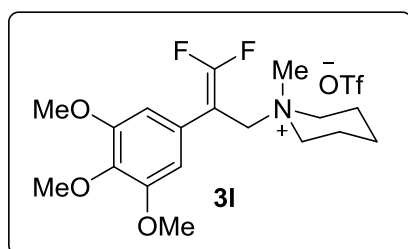

Following the experiment procedure **B**, **3l** was obtained in 95% yield

**<sup>1</sup>H NMR (400 MHz, CDCl<sub>3</sub>):** δ 6.69 (s, 2H), 4.51 (s, 2 H), 3.89 (s, 6H), 3.83 (s, 3H), 3.41-3.32 (m, 4H), 2.96 (s, 3H), 1.85-1.81 (m, 4H), 1.76-1.69 (m, 1H), 1.64-1.54 (m, 1H) ppm; **<sup>19</sup>F NMR (376 MHz, CDCl<sub>3</sub>):** δ -78.57, -78.63 (d, *J* = 12.16 Hz, 1F), -78.68 (d, *J* = 12.52 Hz, 1F), -78.61 ppm; **<sup>13</sup>C NMR (100 MHz, CDCl<sub>3</sub>):** δ 20.0, 20.5, 47.1, 56.5, 60.9, 61.3, 62.5, 85.0 (dd, *J* = 18.2, 19.4 Hz), 105.5, 120.7 (q, *J* = 318.1, 636.1 Hz), 126.1, 138.2, 157.6 (t, *J* = 297.5 Hz), 153.9, 157.4 (t, *J* = 296.8 Hz) ppm; **HRMS (ESI, m/z):** calculated for [M-OTf]<sup>+</sup>: 342.1881, found: 342.1884.

**1-(2-(benzofuran-5-yl)-3,3-difluoroallyl)-1-methylpiperidin-1-ium trifluoromethanesulfonate**

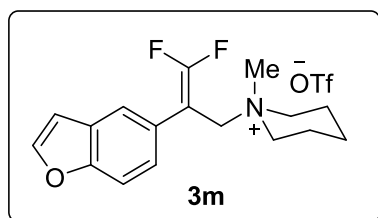

Following the experiment procedure **B**, **3m** was obtained in 99% yield

**<sup>1</sup>H NMR (400 MHz, CDCl<sub>3</sub>):** δ 7.77 (s, 1H), 7.64 (d, *J* = 2.1 Hz, 1H), 7.53 (d, *J* = 8.3 Hz, 1H), 7.37 (d, *J* = 8.7 Hz, 1H), 6.81 (dd, *J* = 0.6, 2.1 Hz, 1H),



4.57 (s, 2 H), 3.35 (t,  $J = 1.0$  Hz, 4H), 2.94 (s, 3H), 1.79-1.73 (m, 4H), 1.71-1.63 (m, 1H), 1.61-1.50 (m, 1H) ppm;  **$^{19}\text{F}$  NMR (376 MHz,  $\text{CDCl}_3$ ):**  $\delta$  -78.46, -78.96 (d,  $J = 13.37$  Hz, 1F), -80.18 (d,  $J = 13.32$  Hz, 1F) ppm;  **$^{13}\text{C}$  NMR (100 MHz,  $\text{CDCl}_3$ ):**  $\delta$  20.0, 20.5, 47.5, 61.3, 62.6, 85.0 (dd,  $J = 16.9, 20.4$  Hz), 106.9, 112.5, 120.7 (q,  $J = 318.2, 636.1$  Hz), 121.7 (t,  $J = 2.8$  Hz), 124.5 (t,  $J = 2.7$  Hz), 125.2 (t,  $J = 2.8$  Hz), 128.6, 146.4, 154.7, 157.4 (t,  $J = 296.6$  Hz) ppm; **HRMS (ESI,  $m/z$ ):** calculated for  $[\text{M-OTf}]^+$ : 292.1513, found: 292.1511.

**1-(2-(2,3-dihydrobenzo[b][1,4]dioxin-6-yl)-3,3-difluoroallyl)-1-**

**methylpiperidin-1-ium**

**trifluoromethanesulfonate**

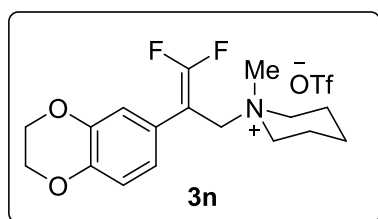

Following the experiment procedure **B**, **3n** was obtained in 99% yield

**$^1\text{H}$  NMR (400 MHz,  $\text{CDCl}_3$ ):**  $\delta$  6.92 (d,  $J = 8.1$  Hz, 1H), 6.90 (s, 1H), 6.87 (d,  $J = 8.4$  Hz, 1H), 4.41 (s, 2 H), 4.23 (s, 4H), 3.33 (t,  $J = 5.4$  Hz, 4H), 2.94 (s, 3H), 1.83-1.77 (m, 4H), 1.74-1.66 (m, 1H), 1.63-1.53 (m, 1H) ppm;  **$^{19}\text{F}$  NMR (376 MHz,  $\text{CDCl}_3$ ):**  $\delta$  -78.55, -78.94 (d,  $J = 12.64$  Hz, 1F), -79.89 (d,  $J = 13.29$  Hz, 1F) ppm;  **$^{13}\text{C}$  NMR (100 MHz,  $\text{CDCl}_3$ ):**  $\delta$  20.0, 20.5, 47.6, 61.3, 62.1, 64.3, 64.4, 84.3 (dd,  $J = 17.4, 20.4$  Hz), 117.2, 118.4, 120.6 (q,  $J = 317.8, 635.8$  Hz), 121.4, 123.5 (t,  $J = 2.7$  Hz), 144.1, 141.2, 157.3 (t,  $J = 296.6$  Hz) ppm; **HRMS (ESI,  $m/z$ ):** calculated for  $[\text{M-OTf}]^+$ :

310.1619, found: 310.1615.

### 1-(3,3-difluoro-3-phenylprop-1-en-2-yl)-4-methoxybenzene

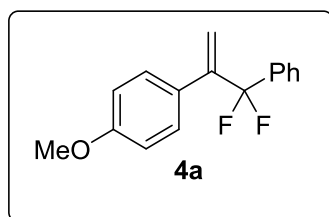

Following the experiment procedure C, **4a** was obtained in 92% yield

**<sup>1</sup>H NMR (400 MHz, CDCl<sub>3</sub>):**  $\delta$  7.55-7.52 (m, 2H), 7.42-7.38 (m, 3H), 7.30 (d,  $J$  = 8.9 Hz, 2H), 6.82 (d,  $J$  = 8.6 Hz, 2H), 5.67 (s, 1H), 5.61 (s, 1H), 3.78 (s, 3H) ppm; **<sup>19</sup>F NMR (376 MHz, CDCl<sub>3</sub>):**  $\delta$  -90.92 ppm; **<sup>13</sup>C NMR (100 MHz, CDCl<sub>3</sub>):**  $\delta$  55.2, 113.6, 118.2 (t,  $J$  = 8.0 Hz), 120.6 (t,  $J$  = 241.1 Hz), 125.9 (t,  $J$  = 5.4 Hz), 128.3, 128.8, 129.4, 129.9 (t,  $J$  = 1.9 Hz), 136.5 (t,  $J$  = 27.2 Hz), 144.8 (t,  $J$  = 26.2 Hz), 159.5 ppm; **HRMS (ESI, m/z):** calculated for [M+H]<sup>+</sup>: 261.1091, found: 261.1097.

### 1-(tert-butyl)-4-(3,3-difluoro-3-phenylprop-1-en-2-yl)benzene

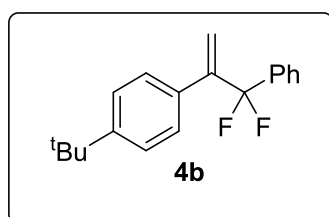

Following the experiment procedure C, **4b** was obtained in 73% yield

**<sup>1</sup>H NMR (400 MHz, CDCl<sub>3</sub>):**  $\delta$  7.50-7.48 (m, 2H), 7.38-7.32 (m, 3H), 7.24-7.21 (m, 4H), 5.60 (s, 1H), 5.59 (s, 1H), 1.24 (s, 9H) ppm; **<sup>19</sup>F NMR (376 MHz, CDCl<sub>3</sub>):**  $\delta$  -90.43 ppm; **<sup>13</sup>C NMR (100 MHz, CDCl<sub>3</sub>):**  $\delta$  31.2, 34.5, 119.0, 120.7 (t,  $J$  = 240.7 Hz), 125.1, 126.0 (t,  $J$  = 5.3 Hz), 127.7,

128.3, 129.9 (t,  $J = 2.3$  Hz), 133.3, 136.5 (t,  $J = 27.0$  Hz), 145.1 (t,  $J = 26.2$  Hz), 151.1 ppm; **HRMS (ESI, m/z)**: calculated for  $[M+H]^+$ : 287.1611, found: 287.1613.

#### 1-(3,3-difluoro-3-phenylprop-1-en-2-yl)-4-methylbenzene

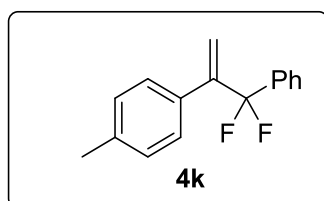

Following the experiment procedure **C**, **4c** was obtained in 62% yield

**$^1\text{H}$  NMR (400 MHz,  $\text{CDCl}_3$ )**:  $\delta$  7.52-7.50 (m, 2H), 7.40-7.38 (m, 3H), 7.22 (d,  $J = 8.0$  Hz, 2H), 7.08 (d,  $J = 7.7$  Hz, 1H), 5.67 (s, 1H), 5.61 (s, 1H), 2.32 (s, 3H) ppm;  **$^{19}\text{F}$  NMR (376 MHz,  $\text{CDCl}_3$ )**:  $\delta$  -90.95 ppm;  **$^{13}\text{C}$  NMR (100 MHz,  $\text{CDCl}_3$ )**:  $\delta$  21.1, 118.8 (t,  $J = 8.0$  Hz), 120.5 (t,  $J = 240.7$  Hz), 125.9 (t,  $J = 5.8$  Hz), 128.0, 128.3, 128.9, 129.9 (t,  $J = 1.4$  Hz), 133.5, 136.4 (t,  $J = 27.1$  Hz), 138.0, 145.2 (t,  $J = 26.2$  Hz) ppm; **HRMS (ESI, m/z)**: calculated for  $[M+H]^+$ : 245.1142, found: 245.1140.

#### 4-(3,3-difluoro-3-phenylprop-1-en-2-yl)-1,1'-biphenyl

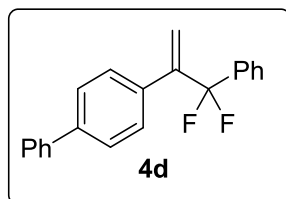

Following the experiment procedure **C**, **4d** was obtained in 72% yield

**$^1\text{H}$  NMR (400 MHz,  $\text{CDCl}_3$ )**:  $\delta$  7.59-7.55 (m, 4H), 7.52 (d,  $J = 8.6$  Hz, 2H), 7.45-7.41 (m, 7H), 7.35 (t,  $J = 7.2$  Hz, 1H), 5.73 (s, 1H), 5.71 (s, 1H)

ppm;  $^{19}\text{F}$  NMR (376 MHz,  $\text{CDCl}_3$ ):  $\delta$  -90.72 ppm;  $^{13}\text{C}$  NMR (100 MHz,  $\text{CDCl}_3$ ):  $\delta$  119.4, 120.6 (t,  $J$  = 241.0 Hz), 126.0 (t,  $J$  = 5.8 Hz), 126.9, 127.0, 127.5, 128.4, 128.6, 128.8, 130.0 (t,  $J$  = 1.7 Hz), 135.3, 136.3 (t,  $J$  = 27.1 Hz), 140.5, 140.9, 145.0 (t,  $J$  = 26.3 Hz) ppm; HRMS (ESI,  $m/z$ ): calculated for  $[\text{M}+\text{H}]^+$ : 307.1298, found: 307.1298.

### 1-chloro-4-(3,3-difluoro-3-phenylprop-1-en-2-yl)benzene

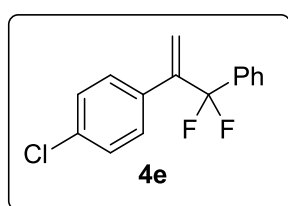

Following the experiment procedure C, **4e** was obtained in 61% yield

$^1\text{H}$  NMR (400 MHz,  $\text{CDCl}_3$ ):  $\delta$  7.49-7.47 (m, 2H), 7.42-7.37 (m, 3H), 7.25 (s, 4H), 5.71 (s, 1H), 5.61 (s, 1H) ppm;  $^{19}\text{F}$  NMR (376 MHz,  $\text{CDCl}_3$ ):  $\delta$  -91.48 ppm;  $^{13}\text{C}$  NMR (100 MHz,  $\text{CDCl}_3$ ):  $\delta$  119.8 (t,  $J$  = 8.0 Hz), 120.3 (t,  $J$  = 241.3 Hz), 125.8 (t,  $J$  = 5.7 Hz), 128.4, 129.6, 130.0 (t,  $J$  = 1.5 Hz), 134.2, 134.8, 136.0 (t,  $J$  = 27.1 Hz), 144.5 (t,  $J$  = 26.3 Hz) ppm; HRMS (ESI,  $m/z$ ): calculated for  $[\text{M}+\text{H}]^+$ : 265.0596, found: 265.0591.

### 1-(3,3-difluoro-3-phenylprop-1-en-2-yl)-3-methoxybenzene

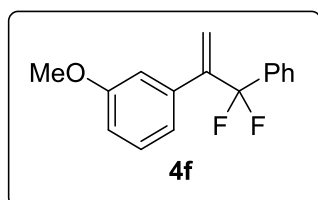

Following the experiment procedure C, **4f** was obtained in 68% yield

$^1\text{H}$  NMR (400 MHz,  $\text{CDCl}_3$ ):  $\delta$  7.52-7.50 (m, 2H), 7.42-7.36 (m, 3H),

7.19 (t,  $J = 7.8$  Hz, 1H), 6.90 (d,  $J = 7.8$  Hz, 1H), 6.85-6.82 (m, 2H), 5.72 (s, 1H), 5.64 (s, 1H) ppm;  $^{19}\text{F}$  NMR (376 MHz,  $\text{CDCl}_3$ ):  $\delta$  -91.14 ppm;  $^{13}\text{C}$  NMR (100 MHz,  $\text{CDCl}_3$ ):  $\delta$  55.2, 113.6, 113.9, 118.0 (t,  $J = 241.3$  Hz), 119.4 (t,  $J = 8.1$  Hz), 120.7, 125.9 (t,  $J = 5.8$  Hz), 128.3, 129.1, 129.9, 136.3 (t,  $J = 27.1$  Hz), 137.8, 145.3 (t,  $J = 26.2$  Hz), 159.2 ppm; HRMS (ESI,  $m/z$ ): calculated for  $[\text{M}+\text{H}]^+$ : 261.1091, found: 261.1090.

### 3-(3,3-difluoro-3-phenylprop-1-en-2-yl)-1,1'-biphenyl

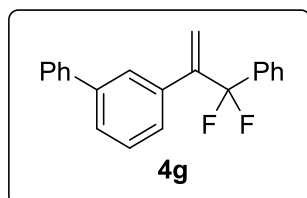

Following the experiment procedure C, **4g** was obtained in 90% yield

$^1\text{H}$  NMR (400 MHz,  $\text{CDCl}_3$ ):  $\delta$  7.55-7.52 (m, 6H), 7.45-7.40 (m, 5H), 7.38-7.34 (m, 2H), 7.30 (d,  $J = 8.0$  Hz, 1H), 5.76 (s, 1H), 5.69 (s, 1H) ppm;  $^{19}\text{F}$  NMR (376 MHz,  $\text{CDCl}_3$ ):  $\delta$  -91.24 ppm;  $^{13}\text{C}$  NMR (100 MHz,  $\text{CDCl}_3$ ):  $\delta$  119.6, 120.5 (t,  $J = 241.3$  Hz), 126.0 (t,  $J = 5.7$  Hz), 127.0, 127.1, 127.2, 127.4, 128.4, 128.6, 128.8, 130.0, 136.3 (t,  $J = 27.0$  Hz), 136.9, 140.8, 141.1, 145.5 (t,  $J = 26.2$  Hz) ppm; HRMS (ESI,  $m/z$ ): calculated for  $[\text{M}+\text{H}]^+$ : 307.1298, found: 307.1299.

### 1-(3,3-difluoro-3-phenylprop-1-en-2-yl)-3-(trifluoromethoxy)benzene

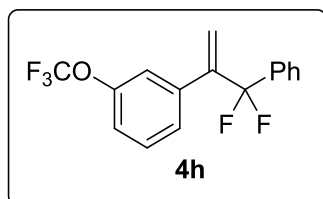

Following the experiment procedure C, **4h** was obtained in 30% yield

**<sup>1</sup>H NMR (400 MHz, CDCl<sub>3</sub>):** δ 7.49-7.47 (m, 2H), 7.42-7.37 (m, 3H), 7.30 (t, *J* = 7.7 Hz, 1H), 7.25 (d, *J* = 8.2 Hz, 1H), 7.15 (d, *J* = 7.7 Hz, 2H), 5.75 (s, 1H), 5.65 (s, 1H) ppm; **<sup>19</sup>F NMR (376 MHz, CDCl<sub>3</sub>):** δ -57.85, -91.63 ppm; **<sup>13</sup>C NMR (100 MHz, CDCl<sub>3</sub>):** δ 120.0 (t, *J* = 241.0 Hz), 120.4 (q, *J* = 255.6, 511.2 Hz), 120.5 (t, *J* = 7.9 Hz), 120.6, 120.9, 125.8 (t, *J* = 5.5 Hz), 126.7, 128.4, 129.5, 130.1, 135.8 (t, *J* = 27.1 Hz), 138.3, 144.3 (t, *J* = 26.9 Hz), 148.9 ppm; **HRMS (ESI, m/z):** calculated for [M+H]<sup>+</sup>: 315.0808, found: 315.0803.

#### 4-(3,3-difluoro-3-phenylprop-1-en-2-yl)-N,N-diphenylaniline

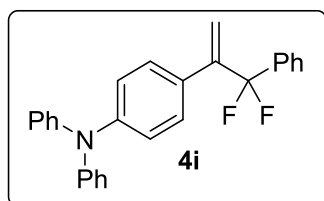

Following the experiment procedure C, **4i** was obtained in 66% yield

**<sup>1</sup>H NMR (400 MHz, CDCl<sub>3</sub>):** δ 7.59-7.57 (m, 2H), 7.45-7.42 (m, 3H), 7.30-7.22 (m, 6H), 7.11 (d, *J* = 7.6 Hz, 4H), 7.06 (t, *J* = 7.3 Hz, 2H), 6.98 (d, *J* = 8.9 Hz, 2H), 5.68 (s, 1H), 5.64 (s, 1H) ppm; **<sup>19</sup>F NMR (376 MHz, CDCl<sub>3</sub>):** δ -90.33 ppm; **<sup>13</sup>C NMR (100 MHz, CDCl<sub>3</sub>):** δ 118.2 (t, *J* = 8.1 Hz), 120.7 (t, *J* = 241.3 Hz), 122.4, 123.2, 124.8, 126.0 (t, *J* = 5.3 Hz), 128.3, 128.8, 129.3, 129.7, 129.9, 136.5 (t, *J* = 27.1 Hz), 144.7 (t, *J* = 25.8 Hz), 147.4, 147.7 ppm; **HRMS (ESI, m/z):** calculated for [M+H]<sup>+</sup>: 398.1720, found: 398.1719

#### 4-(3,3-difluoro-3-phenylprop-1-en-2-yl)-1-fluoro-2-methoxybenzene

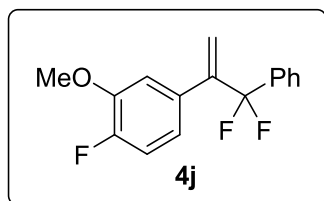

Following the experiment procedure C, **4j** was obtained in 73% yield

**<sup>1</sup>H NMR (400 MHz, CDCl<sub>3</sub>):**  $\delta$  7.50-7.48 (m, 2H), 7.42-7.39 (m, 3H), 6.96 (dd,  $J = 8.3, 11.3$ , 1H), 6.87 (dd,  $J = 1.9, 8.3$  Hz, 1H), 6.84-6.81 (m, 1H), 5.71 (s, 1H), 5.59 (s, 1H) ppm; **<sup>19</sup>F NMR (376 MHz, CDCl<sub>3</sub>):**  $\delta$  -91.82, -135.77- -135.84 (m) ppm; **<sup>13</sup>C NMR (100 MHz, CDCl<sub>3</sub>):**  $\delta$  56.1, 113.6, 115.7 (t,  $J = 18.2$  Hz), 120.3 (t,  $J = 241.0$  Hz), 121.1 (d,  $J = 6.7$  Hz), 125.8 (t,  $J = 5.8$  Hz), 126.4, 128.0, 128.4, 130.0, 136.5 (t,  $J = 29.2$  Hz), 144.8 (t,  $J = 26.4$  Hz), 147.0 (d,  $J = 10.7$  Hz) ppm; **HRMS (ESI, m/z):** calculated for  $[M+H]^+$ : 279.0997, found: 279.0998.

#### 4-(3,3-difluoro-3-phenylprop-1-en-2-yl)-1-methoxy-2-(trifluoromethyl)benzene

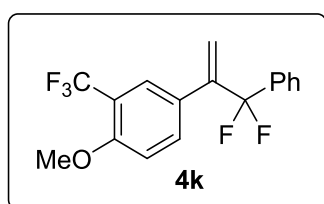

Following the experiment procedure C, **4k** was obtained in 87% yield

**<sup>1</sup>H NMR (400 MHz, CDCl<sub>3</sub>):**  $\delta$  7.54 (d,  $J = 1.4$  Hz, 1H), 7.50-7.37 (m, 6H), 6.90 (d,  $J = 8.7$  Hz, 1H), 5.68 (s, 1H), 5.60 (s, 1H) ppm; **<sup>19</sup>F NMR (376 MHz, CDCl<sub>3</sub>):**  $\delta$  -62.59, -91.51 ppm; **<sup>13</sup>C NMR (100 MHz, CDCl<sub>3</sub>):**

$\delta$  56.0, 111.6, 118.4 (q,  $J = 31.0, 61.8$  Hz), 119.5 (t,  $J = 7.6$  Hz), 120.4 (t,  $J = 240.6$  Hz), 123.4 (q,  $J = 215.8, 652.7$  Hz), 125.8 (t,  $J = 5.6$  Hz), 127.0 (q,  $J = 4.6, 10.2$  Hz), 128.3, 128.4, 130.0 (t,  $J = 1.8$  Hz), 133.0, 135.9 (t,  $J = 27.2$  Hz), 144.0 (t,  $J = 26.7$  Hz), 157.3 ppm; **HRMS (ESI, m/z)**: calculated for  $[M+H]^+$ : 329.0965, found: 329.0956.

### 5-(3,3-difluoro-3-phenylprop-1-en-2-yl)-1,2,3-trimethoxybenzene

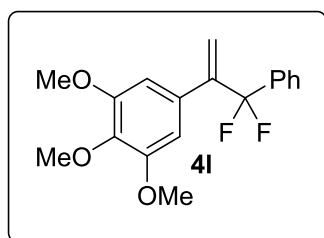

Following the experiment procedure C, **4l** was obtained in 75% yield

**$^1\text{H NMR}$  (400 MHz,  $\text{CDCl}_3$ )**:  $\delta$  7.53-7.51 (m, 2H), 7.43-7.38 (m, 3H), 6.48 (s, 2H), 5.70 (s, 1H), 5.61 (s, 1H) ppm;  **$^{19}\text{F NMR}$  (376 MHz,  $\text{CDCl}_3$ )**:  $\delta$  -91.53 ppm;  **$^{13}\text{C NMR}$  (100 MHz,  $\text{CDCl}_3$ )**:  $\delta$  54.9, 59.8, 104.5, 118.0 (t,  $J = 7.9$  Hz), 119.3 (t,  $J = 241.4$  Hz), 124.8 (t,  $J = 5.4$  Hz), 127.3, 128.9, 130.9, 135.3 (t,  $J = 27.3$  Hz), 136.9, 144.3 (t,  $J = 26.4$  Hz), 151.6 ppm; **HRMS (ESI, m/z)**: calculated for  $[M+H]^+$ : 321.1302, found: 321.1295.

### 5-(3,3-difluoro-3-phenylprop-1-en-2-yl)benzofuran

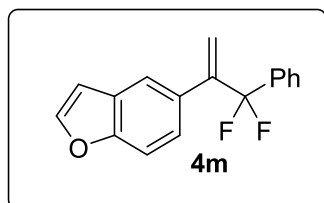

Following the experiment procedure C, **4m** was obtained in 73% yield

**$^1\text{H NMR}$  (400 MHz,  $\text{CDCl}_3$ )**:  $\delta$  7.59 (d,  $J = 2.1$  Hz, 1H), 7.56 (s, 1H),



7.52-7.50 (m, 2H), 7.40-7.34 (m, 2H), 7.24 (d,  $J = 7.4$  Hz, 1H), 6.71 (dd,  $J = 0.8, 2.1$  Hz, 1H), 5.73 (s, 1H), 5.61 (s, 1H) ppm;  $^{19}\text{F}$  NMR (376 MHz,  $\text{CDCl}_3$ ):  $\delta$  -91.31 ppm;  $^{13}\text{C}$  NMR (100 MHz,  $\text{CDCl}_3$ ):  $\delta$  106.8, 111.0, 119.4 (t,  $J = 7.9$  Hz), 120.6 (t,  $J = 240.8$  Hz), 121.2, 124.9, 125.9 (t,  $J = 5.8$  Hz), 127.3, 128.3, 129.9 (t,  $J = 2.0$  Hz), 131.4, 136.4 (t,  $J = 27.7$  Hz), 145.5, 145.7 (t,  $J = 26.2$  Hz), 154.7 ppm; HRMS (ESI,  $m/z$ ): calculated for  $[\text{M}+\text{H}]^+$ : 271.0934, found: 271.0927.

**6-(3,3-difluoro-3-phenylprop-1-en-2-yl)-2,3-dihydrobenzo[b][1,4]dioxine**

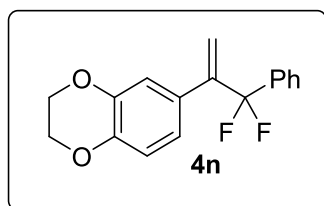

Following the experiment procedure C, **4n** was obtained in 58% yield

$^1\text{H}$  NMR (400 MHz,  $\text{CDCl}_3$ ):  $\delta$  7.52-7.50 (m, 2H), 7.40-7.36 (m, 2H), 6.88 (d,  $J = 1.8$  Hz, 1H), 6.82 (dd,  $J = 1.9, 8.6$  Hz, 1H), 6.75 (d,  $J = 8.4$  Hz, 1H), 5.63 (s, 1H), 5.59 (s, 1H), 4.23 (s, 4H) ppm;  $^{19}\text{F}$  NMR (376 MHz,  $\text{CDCl}_3$ ):  $\delta$  -90.73 ppm;  $^{13}\text{C}$  NMR (100 MHz,  $\text{CDCl}_3$ ):  $\delta$  64.3, 64.4, 116.9, 117.2, 118.6 (t,  $J = 8.0$  Hz), 120.5 (t,  $J = 240.7$  Hz), 121.4, 125.9 (t,  $J = 5.8$  Hz), 128.3, 129.7, 129.9, 136.4 (t,  $J = 27.1$  Hz), 143.0, 143.6, 144.5 (t,  $J = 26.0$  Hz) ppm; HRMS (ESI,  $m/z$ ): calculated for  $[\text{M}+\text{H}]^+$ : 289.1040, found: 289.1038.

**4,4'-(1,1-difluoroprop-2-ene-1,2-diyl)bis(methoxybenzene)**

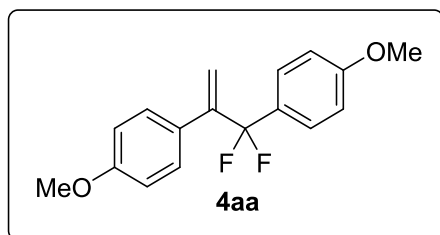

Following the experiment procedure C, **4aa** was obtained in 88% yield

**<sup>1</sup>H NMR (400 MHz, CDCl<sub>3</sub>):**  $\delta$  7.43 (d,  $J$  = 8.9 Hz, 2H), 7.27 (d,  $J$  = 8.9 Hz, 2H), 6.89 (d,  $J$  = 9.0 Hz, 2H), 6.80 (d,  $J$  = 8.9 Hz, 1H), 6.75 (d,  $J$  = 8.4 Hz, 1H), 5.65 (s, 1H), 5.58 (s, 1H), 3.81 (s, 3H), 3.78 (s, 3H) ppm; **<sup>19</sup>F NMR (376 MHz, CDCl<sub>3</sub>):**  $\delta$  -89.28 ppm; **<sup>13</sup>C NMR (100 MHz, CDCl<sub>3</sub>):**  $\delta$  55.2, 55.3, 113.5, 113.6, 117.8 (t,  $J$  = 7.7 Hz), 120.7 (t,  $J$  = 240.0 Hz), 127.5 (t,  $J$  = 5.7 Hz), 128.8 (t,  $J$  = 27.9 Hz), 129.0, 129.3, 144.9 (t,  $J$  = 26.3 Hz), 159.4, 160.7 ppm; **HRMS (ESI, m/z):** calculated for [M+H]<sup>+</sup>: 291.1197, found: 297.1194.

### 1-(tert-butyl)-4-(1,1-difluoro-2-(4-methoxyphenyl)allyl)benzene

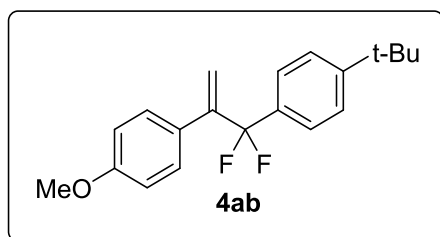

Following the experiment procedure C, **4ab** was obtained in 99% yield

**<sup>1</sup>H NMR (400 MHz, CDCl<sub>3</sub>):**  $\delta$  7.43 (dd,  $J$  = 8.7, 19.2 Hz, 4H), 7.31 (d,  $J$  = 9.0 Hz, 2H), 6.82 (d,  $J$  = 8.7 Hz, 2H), 5.63 (s, 1H), 5.60 (s, 1H), 3.79 (s, 3H), 1.33 (s, 3H) ppm; **<sup>19</sup>F NMR (376 MHz, CDCl<sub>3</sub>):**  $\delta$  -89.74 ppm; **<sup>13</sup>C NMR (100 MHz, CDCl<sub>3</sub>):**  $\delta$  31.2, 34.7, 55.2, 113.6, 118.1 (t,  $J$  = 8.0 Hz), 120.8 (t,  $J$  = 239.9 Hz), 125.2, 125.7 (t,  $J$  = 5.6 Hz), 129.0, 129.4, 133.6 (t,

$J = 27.6$  Hz), 144.9 (t,  $J = 26.3$  Hz), 153.0, 159.5 ppm; **HRMS (ESI, m/z)**: calculated for  $[M+H]^+$ : 317.1717, found: 317.1709.

#### 4-(1,1-difluoro-2-(4-methoxyphenyl)allyl)-1,1'-biphenyl

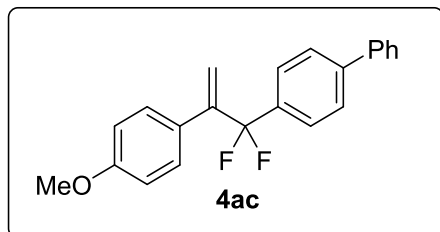

Following the experiment procedure **C**, **4ac** was obtained in 85% yield

**$^1\text{H NMR}$  (400 MHz,  $\text{CDCl}_3$ ):**  $\delta$  7.60 (dd,  $J = 8.7, 14.0$  Hz, 6H), 7.46 (d,  $J = 7.2$  Hz, 2H), 7.38 (d,  $J = 7.5$  Hz, 1H), 7.32 (d,  $J = 8.6$  Hz, 2H), 6.83 (d,  $J = 8.9$  Hz, 2H), 5.70 (s, 1H), 5.62 (s, 1H), 3.79 (s, 3H) ppm;  **$^{19}\text{F NMR}$  (376 MHz,  $\text{CDCl}_3$ ):**  $\delta$  -90.56 ppm;  **$^{13}\text{C NMR}$  (100 MHz,  $\text{CDCl}_3$ ):**  $\delta$  55.2, 113.6, 118.2 (t,  $J = 7.8$  Hz), 120.7 (t,  $J = 240.7$  Hz), 126.4 (t,  $J = 5.2$  Hz), 127.0, 127.2, 127.8, 128.8, 128.9, 129.4, 135.4 (t,  $J = 27.5$  Hz), 140.2, 142.7, 144.7 (t,  $J = 26.1$  Hz), 159.5 ppm; **HRMS (ESI, m/z)**: calculated for  $[M+H]^+$ : 337.1404, found: 337.1406.

#### 4-(1,1-difluoro-2-(4-methoxyphenyl)allyl)benzotrile

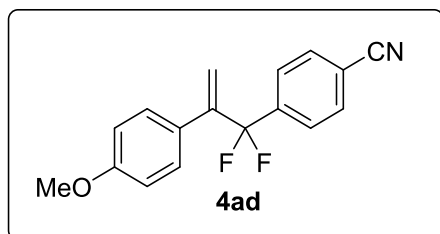

Following the experiment procedure **C**, **4ad** was obtained in 62% yield

**$^1\text{H NMR}$  (400 MHz,  $\text{CDCl}_3$ ):**  $\delta$  7.66 (d,  $J = 8.6$  Hz, 2H), 7.58 (d,  $J = 8.8$  Hz, 2H), 7.21 (d,  $J = 8.7$  Hz, 2H), 6.80 (d,  $J = 8.5$  Hz, 2H), 5.69 (s, 1H),

5.60 (s, 1H), 3.78 (s, 3H) ppm;  $^{19}\text{F}$  NMR (376 MHz,  $\text{CDCl}_3$ ):  $\delta$  -92.87 ppm;  $^{13}\text{C}$  NMR (100 MHz,  $\text{CDCl}_3$ ):  $\delta$  55.2, 113.7, 113.9 (t,  $J = 1.9$  Hz), 118.1, 118.7 (t,  $J = 8.5$  Hz), 119.5 (t,  $J = 242.8$  Hz), 126.7 (t,  $J = 5.8$  Hz), 128.0, 129.4, 132.2, 141.1 (t,  $J = 27.8$  Hz), 144.0 (t,  $J = 24.9$  Hz), 159.8 ppm; HRMS (ESI,  $m/z$ ): calculated for  $[\text{M}+\text{H}]^+$ : 286.1043, found: 286.1045.

### 1-(4-(1,1-difluoro-2-(4-methoxyphenyl)allyl)phenyl)ethan-1-one

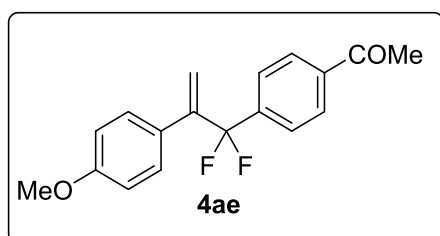

Following the experiment procedure C, **4ae** was obtained in 58% yield

$^1\text{H}$  NMR (400 MHz,  $\text{CDCl}_3$ ):  $\delta$  7.95 (d,  $J = 8.2$  Hz, 2H), 7.58 (d,  $J = 8.3$  Hz, 2H), 7.23 (d,  $J = 8.7$  Hz, 2H), 6.79 (d,  $J = 8.8$  Hz, 2H), 5.68 (s, 1H), 5.58 (s, 1H), 3.71 (s, 3H), 2.60 (s, 3H) ppm;  $^{19}\text{F}$  NMR (376 MHz,  $\text{CDCl}_3$ ):  $\delta$  -92.20 ppm;  $^{13}\text{C}$  NMR (100 MHz,  $\text{CDCl}_3$ ):  $\delta$  26.8, 55.2, 113.6, 118.5 (t,  $J = 8.0$  Hz), 120.0 (t,  $J = 241.5$  Hz), 126.2 (t,  $J = 5.3$  Hz), 128.3, 128.5, 129.4, 138.1, 140.9 (t,  $J = 27.7$  Hz), 144.3 (t,  $J = 25.2$  Hz), 159.6, 197.5 ppm; HRMS (ESI,  $m/z$ ): calculated for  $[\text{M}+\text{H}]^+$ : 303.1197, found: 303.1192.

**methyl**                      **4-(1,1-difluoro-2-(4-methoxyphenyl)allyl)benzoate**

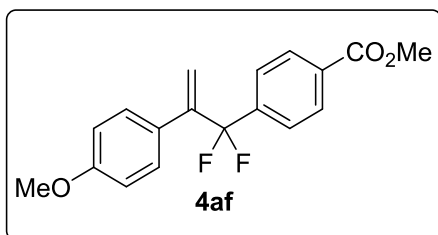

Following the experiment procedure C, **4af** was obtained in 58% yield

**$^1\text{H}$  NMR (400 MHz,  $\text{CDCl}_3$ ):**  $\delta$  8.04 (d,  $J = 8.6$  Hz, 2H), 7.56 (d,  $J = 8.2$  Hz, 2H), 7.23 (d,  $J = 8.9$  Hz, 2H), 6.79 (d,  $J = 8.9$  Hz, 2H), 5.67 (s, 1H), 5.59 (s, 1H), 3.92 (s, 3H), 3.77 (s, 3H) ppm;  **$^{19}\text{F}$  NMR (376 MHz,  $\text{CDCl}_3$ ):**  $\delta$  -92.26 ppm;  **$^{13}\text{C}$  NMR (100 MHz,  $\text{CDCl}_3$ ):**  $\delta$  52.4, 55.2, 113.6, 118.4 (t,  $J = 8.0$  Hz), 120.0 (t,  $J = 241.4$  Hz), 126.0 (t,  $J = 5.7$  Hz), 128.4, 129.4, 129.6, 131.5, 140.8 (t,  $J = 27.5$  Hz), 144.4 (t,  $J = 25.6$  Hz), 159.6, 166.4 ppm; **HRMS (ESI,  $m/z$ ):** calculated for  $[\text{M}+\text{H}]^+$ : 319.1146, found: 319.1138.

#### 1-(1,1-difluoro-2-(4-methoxyphenyl)allyl)-4-fluorobenzene

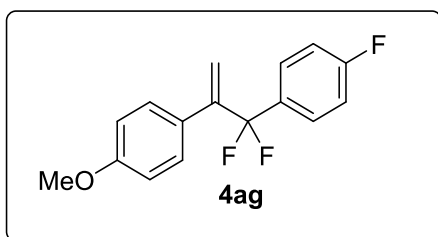

Following the experiment procedure C, **4ag** was obtained in 39% yield

**$^1\text{H}$  NMR (400 MHz,  $\text{CDCl}_3$ ):**  $\delta$  7.48 (dd,  $J = 5.7, 8.4$  Hz, 2H), 7.24 (d,  $J = 8.8$  Hz, 2H), 7.05 (d,  $J = 9.0$  Hz, 2H), 6.80 (d,  $J = 8.7$  Hz, 2H), 5.65 (s, 1H), 5.58 (s, 1H), 3.78 (s, 3H) ppm;  **$^{19}\text{F}$  NMR (376 MHz,  $\text{CDCl}_3$ ):**  $\delta$  -90.14, -111.02- -111.09 (m) ppm;  **$^{13}\text{C}$  NMR (100 MHz,  $\text{CDCl}_3$ ):**  $\delta$  55.2, 113.6, 115.4 (d,  $J = 21.8$  Hz), 118.2 (t,  $J = 8.1$  Hz), 120.2 (t,  $J = 241.5$  Hz),

128.0 (t,  $J = 5.7$  Hz), 128.1 (t,  $J = 5.5$  Hz), 128.6, 128.8, 129.4, 135.0 (t,  $J = 27.9$  Hz), 144.6 (t,  $J = 25.7$  Hz), 159.5 ppm; **HRMS (ESI, m/z)**: calculated for  $[M+H]^+$ : 279.0997, found: 279.0996.

### 1-chloro-4-(1,1-difluoro-2-(4-methoxyphenyl)allyl)benzene

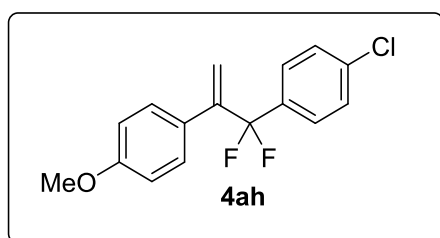

Following the experiment procedure **C**, **4ah** was obtained in 76% yield

**$^1\text{H}$  NMR (400 MHz,  $\text{CDCl}_3$ )**:  $\delta$  7.42 (d,  $J = 8.7$  Hz, 2H), 7.33 (d,  $J = 8.7$  Hz, 2H), 7.23 (d,  $J = 8.7$  Hz, 2H), 6.79 (d,  $J = 8.7$  Hz, 2H), 5.65 (s, 1H), 5.57 (s, 1H), 3.77 (s, 3H) ppm;  **$^{19}\text{F}$  NMR (376 MHz,  $\text{CDCl}_3$ )**:  $\delta$  -91.03 ppm;  **$^{13}\text{C}$  NMR (100 MHz,  $\text{CDCl}_3$ )**:  $\delta$  55.2, 113.6, 118.2 (t,  $J = 8.1$  Hz), 120.1 (t,  $J = 241.3$  Hz), 127.4 (t,  $J = 5.2$  Hz), 128.5, 128.6, 129.4, 135.0 (t,  $J = 27.9$  Hz), 136.0 (t,  $J = 2.0$  Hz), 144.4 (t,  $J = 25.5$  Hz), 159.6 ppm; **HRMS (ESI, m/z)**: calculated for  $[M+H]^+$ : 295.0701, found: 295.0702.

### 1-bromo-4-(1,1-difluoro-2-(4-methoxyphenyl)allyl)benzene

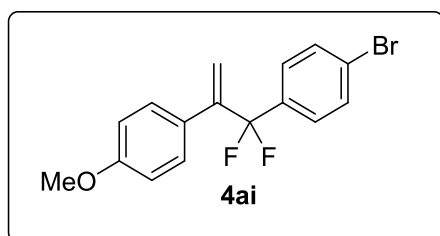

Following the experiment procedure **C**, **4ai** was obtained in 64% yield

**$^1\text{H}$  NMR (400 MHz,  $\text{CDCl}_3$ )**:  $\delta$  7.50 (d,  $J = 8.6$  Hz, 2H), 7.35 (d,  $J = 8.9$  Hz, 2H), 7.23 (d,  $J = 9.0$  Hz, 2H), 6.80 (d,  $J = 8.7$  Hz, 2H), 5.65 (s, 1H),

5.57 (s, 1H), 3.77 (s, 3H) ppm;  $^{19}\text{F}$  NMR (376 MHz,  $\text{CDCl}_3$ ):  $\delta$  -91.25 ppm;  $^{13}\text{C}$  NMR (100 MHz,  $\text{CDCl}_3$ ):  $\delta$  55.2, 113.6, 118.3 (t,  $J = 8.0$  Hz), 120.1 (t,  $J = 241.2$  Hz), 124.3 (t,  $J = 2.1$  Hz), 127.6 (t,  $J = 5.7$  Hz), 128.4, 129.4, 131.6, 135.5 (t,  $J = 27.8$  Hz), 144.3 (t,  $J = 25.5$  Hz), 159.6 ppm; HRMS (ESI,  $m/z$ ): calculated for  $[\text{M}+\text{H}]^+$ : 339.0196, found: 339.0192.

### 3-(1,1-difluoro-2-(4-methoxyphenyl)allyl)-1,1'-biphenyl

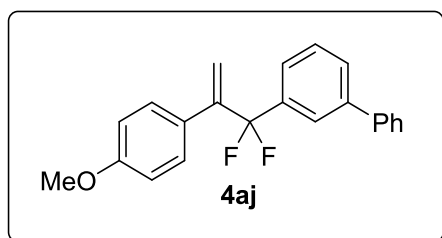

Following the experiment procedure C, **4aj** was obtained in 60% yield

$^1\text{H}$  NMR (400 MHz,  $\text{CDCl}_3$ ):  $\delta$  7.73 (s, 1H), 7.63 (d,  $J = 7.3$  Hz, 1H), 7.56 (t,  $J = 1.4$  Hz, 1H), 7.55 (s, 1H), 7.50-7.43 (m, 4H), 7.37 (tt,  $J = 1.2, 8.5$  Hz, 1H), 7.30 (d,  $J = 9.1$  Hz, 2H), 6.82 (d,  $J = 8.7$  Hz, 2H), 5.69 (s, 1H), 5.61 (s, 1H), 3.79 (s, 3H) ppm;  $^{19}\text{F}$  NMR (376 MHz,  $\text{CDCl}_3$ ):  $\delta$  -90.93 ppm;  $^{13}\text{C}$  NMR (100 MHz,  $\text{CDCl}_3$ ):  $\delta$  55.2, 113.6, 118.4 (t,  $J = 8.0$  Hz), 120.6 (t,  $J = 241.3$  Hz), 124.7 (t,  $J = 5.7$  Hz), 124.8 (t,  $J = 5.2$  Hz), 127.2, 127.7, 128.6, 128.8, 128.9, 129.4, 137.0 (t,  $J = 27.6$  Hz), 140.4, 141.3, 144.7 (t,  $J = 26.1$  Hz), 159.5 ppm; HRMS (ESI,  $m/z$ ): calculated for  $[\text{M}+\text{H}]^+$ : 337.1404, found: 337.1401.

### 1-(1,1-difluoro-2-(4-methoxyphenyl)allyl)-3-(trifluoromethyl)benzene

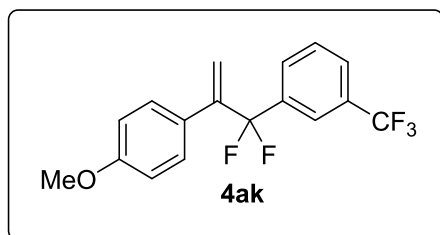

Following the experiment procedure C, **4ak** was obtained in 75% yield

**<sup>1</sup>H NMR (400 MHz, CDCl<sub>3</sub>):**  $\delta$  7.76 (s, 1H), 7.66 (d,  $J$  = 8.0 Hz, 2H), 7.51 (t,  $J$  = 7.5 Hz, 1H), 7.24 (d,  $J$  = 8.6 Hz, 2H), 6.81 (d,  $J$  = 8.7 Hz, 2H), 5.66 (s, 1H), 5.61 (s, 1H), 3.78 (s, 3H) ppm; **<sup>19</sup>F NMR (376 MHz, CDCl<sub>3</sub>):**  $\delta$  -62.73, -91.62 ppm; **<sup>13</sup>C NMR (100 MHz, CDCl<sub>3</sub>):**  $\delta$  55.2, 113.7, 118.8 (t,  $J$  = 8.2 Hz), 119.8 (t,  $J$  = 241.8 Hz), 122.9 (q,  $J$  = 7.8, 9.6 Hz), 126.7, 127.5 (q,  $J$  = 445.1, 587.7 Hz), 129.0, 129.3 (t,  $J$  = 5.4 Hz), 130.4, 130.7 (t,  $J$  = 27.3 Hz), 131.0, 137.5 (t,  $J$  = 28.3 Hz), 144.2 (t,  $J$  = 25.7 Hz), 159.7 ppm; **HRMS (ESI, m/z):** calculated for [M+H]<sup>+</sup>: 329.0965, found: 329.0970.

#### 1-(1,1-difluoro-2-(4-methoxyphenyl)allyl)-3-fluorobenzene

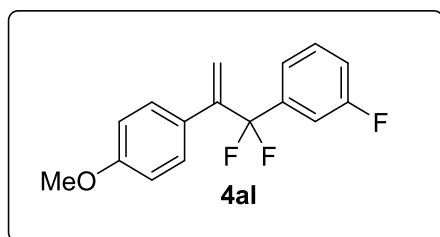

Following the experiment procedure C, **4al** was obtained in 55% yield

**<sup>1</sup>H NMR (400 MHz, CDCl<sub>3</sub>):**  $\delta$  7.35 (dd,  $J$  = 7.9, 13.5 Hz, 1H), 7.26 (t,  $J$  = 2.2 Hz, 3H), 7.21 (d,  $J$  = 9.7 Hz, 1H), 7.09 (td,  $J$  = 2.1, 8.5 Hz, 1H), 6.80 (d,  $J$  = 8.8 Hz, 2H), 5.66 (s, 1H), 5.59 (s, 1H), 3.78 (s, 3H) ppm; **<sup>19</sup>F NMR (376 MHz, CDCl<sub>3</sub>):**  $\delta$  -91.24, -112.00- -112.07(m) ppm; **<sup>13</sup>C NMR (100 MHz, CDCl<sub>3</sub>):**  $\delta$  55.2, 113.3 (dt,  $J$  = 6.0, 23.8 Hz), 113.6, 116.9 (d,  $J$  =



21.2 Hz), 118.4 (t,  $J = 8.3$  Hz), 119.8 (t,  $J = 241.4$  Hz), 121.6-121.8 (m), 128.4, 129.4, 130.1 (d,  $J = 8.0$  Hz), 138.8 (td,  $J = 6.8, 27.9$  Hz), 144.3 (t,  $J = 25.5$  Hz), 159.6, 162.5 (d,  $J = 245.3$  Hz) ppm; **HRMS (ESI, m/z)**: calculated for  $[M+H]^+$ : 279.0997, found: 279.0996.

### 1-(1,1-difluoro-2-(4-methoxyphenyl)allyl)-2-methylbenzene

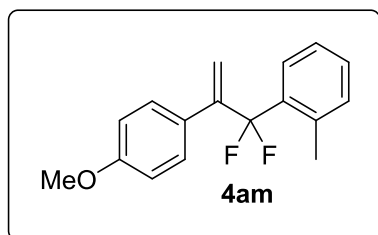

Following the experiment procedure **C**, **4am** was obtained in 27% yield

**$^1\text{H}$  NMR (400 MHz,  $\text{CDCl}_3$ )**:  $\delta$  7.54 (d,  $J = 7.7$  Hz, 1H), 7.34 (d,  $J = 8.6$  Hz, 2H), 7.30 (t,  $J = 7.5$  Hz, 1H), 7.20 (t,  $J = 7.7$  Hz, 2H), 6.84 (d,  $J = 8.8$  Hz, 2H), 5.54 (s, 1H), 5.38 (s, 1H), 3.80 (s, 3H), 2.38 (s, 3H) ppm;  **$^{19}\text{F}$  NMR (376 MHz,  $\text{CDCl}_3$ )**:  $\delta$  -89.04 ppm;  **$^{13}\text{C}$  NMR (100 MHz,  $\text{CDCl}_3$ )**:  $\delta$  20.4, 55.2, 113.5, 119.3 (t,  $J = 7.4$  Hz), 125.5, 126.8 (t,  $J = 8.2$  Hz), 128.9, 129.4, 129.9, 131.0, 131.7, 134.3 (t,  $J = 25.2$  Hz), 136.5, 144.9 (t,  $J = 26.6$  Hz), 159.5 ppm; **HRMS (ESI, m/z)**: calculated for  $[M+H]^+$ : 275.1247, found: 275.1242.

### 1-(1,1-difluoro-2-(4-methoxyphenyl)allyl)-2-fluorobenzene

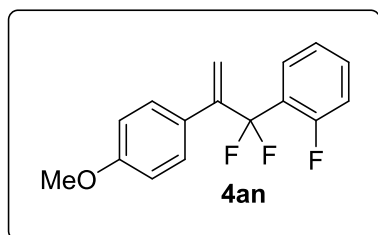

Following the experiment procedure **C**, **4an** was obtained in 13% yield

**<sup>1</sup>H NMR (400 MHz, CDCl<sub>3</sub>):** δ 7.53 (t, *J* = 8.2 Hz, 1H), 7.42-7.36 (m, 1H), 7.30 (d, *J* = 8.8 Hz, 2H), 7.15 (t, *J* = 7.4 Hz, 1H), 7.07 (t, *J* = 10.0 Hz, 1H), 6.81 (d, *J* = 8.9 Hz, 2H), 5.62 (s, 1H), 5.55 (s, 1H), 3.78 (s, 3H), ppm; **<sup>19</sup>F NMR (376 MHz, CDCl<sub>3</sub>):** δ -90.75 (d, *J* = 11.4 Hz), -112.69- 112.81(m) ppm; **<sup>13</sup>C NMR (100 MHz, CDCl<sub>3</sub>):** δ 55.2, 113.5, 116.4 (d, *J* = 21.1 Hz), 118.7 (td, *J* = 1.1, 7.2 Hz), 119.0 (t, *J* = 241.3 Hz), 123.8 (d, *J* = 3.7 Hz), 127.8 (td, *J* = 1.4, 6.4 Hz), 128.6, 129.4, 132.0 (d, *J* = 8.1 Hz), 144.2 (t, *J* = 25.1 Hz), 159.5 ppm; **HRMS (ESI, m/z):** calculated for [M+H]<sup>+</sup>: 279.0997, found: 279.0993.

#### 4-(4-(1,1-difluoro-2-(4-methoxyphenyl)allyl)benzyl)morpholine

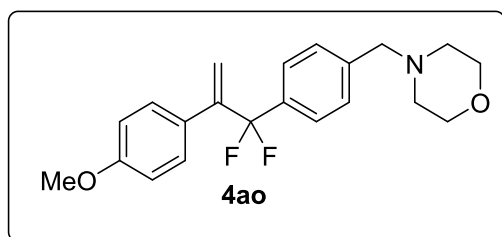

Following the experiment procedure C, **4ao** was obtained in 72% yield

**<sup>1</sup>H NMR (400 MHz, CDCl<sub>3</sub>):** δ 7.45 (d, *J* = 8.0 Hz, 2H), 7.34 (d, *J* = 8.5 Hz, 2H), 7.27 (t, *J* = 7.3 Hz, 2H), 6.80 (d, *J* = 8.7 Hz, 2H), 5.62 (s, 1H), 5.58 (s, 1H), 3.78 (s, 3H), 3.70 (t, *J* = 4.6 Hz, 4H), 3.50 (s, 2H), 2.43 (s, 4H) ppm; **<sup>19</sup>F NMR (376 MHz, CDCl<sub>3</sub>):** δ -90.41 ppm; **<sup>13</sup>C NMR (100 MHz, CDCl<sub>3</sub>):** δ 53.6, 55.2, 63.0, 67.0, 113.5, 118.2 (t, *J* = 8.0 Hz), 120.6 (t, *J* = 240.7 Hz), 125.9 (t, *J* = 5.7 Hz), 128.8, 129.0, 129.4, 135.4(t, *J* = 27.2 Hz), 139.7, 144.7 (t, *J* = 25.8 Hz), 159.5 ppm; **HRMS (ESI, m/z):** calculated for [M+H]<sup>+</sup>: 360.1775, found: 360.1771.

### 1-(1,1-difluoro-2-(4-methoxyphenyl)allyl)naphthalene

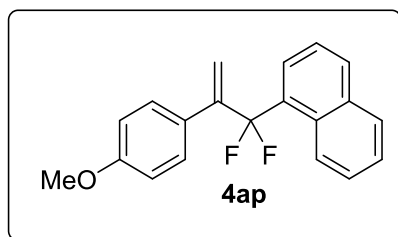

Following the experiment procedure C, **4ap** was obtained in 71% yield

**<sup>1</sup>H NMR (400 MHz, CDCl<sub>3</sub>):**  $\delta$  8.19-8.16 (m, 1H), 7.92 (d,  $J = 8.4$  Hz, 1H), 7.89-7.87 (m, 1H), 7.82 (d,  $J = 6.9$  Hz, 1H), 7.54-7.50(m, 2H), 7.47 (t,  $J = 7.6$  Hz, 1H), 7.41 (d,  $J = 8.9$  Hz, 2H), 6.85 (d,  $J = 8.8$  Hz, 2H), 5.60 (s, 1H), 5.45 (s, 1H), 3.80 (s, 3H) ppm; **<sup>19</sup>F NMR (376 MHz, CDCl<sub>3</sub>):**  $\delta$  -86.35 ppm; **<sup>13</sup>C NMR (100 MHz, CDCl<sub>3</sub>):**  $\delta$  55.2, 113.6, 120.0 (t,  $J = 7.5$  Hz), 121.8 (t,  $J = 260.3$  Hz), 124.4, 125.5 (t,  $J = 8.7$  Hz), 125.8 (t,  $J = 3.0$  Hz), 125.9, 126.6, 128.7, 128.9, 129.5, 130.0 (t,  $J = 2.2$  Hz), 131.1, 131.8 (t,  $J = 25.0$  Hz), 134.0, 145.5 (t,  $J = 26.1$  Hz), 159.6 ppm; **HRMS (ESI, m/z):** calculated for [M+H]<sup>+</sup>: 311.1247, found: 311.1251.

### 2-(1,1-difluoro-2-(4-methoxyphenyl)allyl)naphthalene

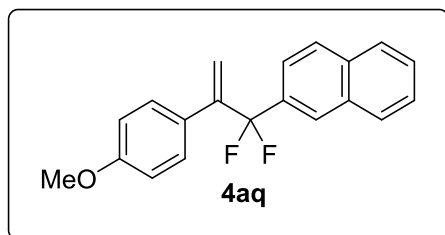

Following the experiment procedure C, **4aq** was obtained in 30% yield

**<sup>1</sup>H NMR (400 MHz, CDCl<sub>3</sub>):**  $\delta$  8.03 (s, 1H), 7.87-7.85 (m, 3H), 7.58-7.52 (m, 3H), 7.30 (d,  $J = 8.5$  Hz, 2H), 6.78 (d,  $J = 8.7$  Hz, 2H), 5.71 (s, 1H), 5.64 (s, 1H), 3.76 (s, 3H) ppm; **<sup>19</sup>F NMR (376 MHz, CDCl<sub>3</sub>):**  $\delta$  -90.53

ppm;  $^{13}\text{C}$  NMR (100 MHz,  $\text{CDCl}_3$ ):  $\delta$  55.2, 113.6, 118.4 (t,  $J = 7.7$  Hz), 120.8 (t,  $J = 241.2$  Hz), 123.0 (t,  $J = 4.6$  Hz), 125.8 (t,  $J = 6.4$  Hz), 126.6, 127.2, 127.7, 128.3, 128.7, 128.8, 129.4, 132.5, 133.7 (t,  $J = 27.0$  Hz), 133.8, 144.7 (t,  $J = 26.3$  Hz), 159.5 ppm; HRMS (ESI,  $m/z$ ): calculated for  $[\text{M}+\text{H}]^+$ : 311.1247, found: 311.1239.

### 1-(1,1-difluoro-2-(4-methoxyphenyl)allyl)-3,5-dimethylbenzene

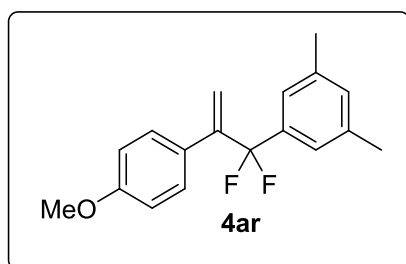

Following the experiment procedure C, **4ar** was obtained in 76% yield

$^1\text{H}$  NMR (400 MHz,  $\text{CDCl}_3$ ):  $\delta$  7.28 (d,  $J = 8.9$  Hz, 2H), 7.13 (s, 2H), 7.03 (s, 1H), 6.81 (d,  $J = 8.8$  Hz, 2H), 5.61 (s, 1H), 5.58 (s, 1H), 3.78 (s, 3H), 2.32 (s, 6H) ppm;  $^{19}\text{F}$  NMR (376 MHz,  $\text{CDCl}_3$ ):  $\delta$  -90.29 ppm;  $^{13}\text{C}$  NMR (100 MHz,  $\text{CDCl}_3$ ):  $\delta$  21.3, 55.2, 113.5, 118.1 (t,  $J = 8.0$  Hz), 120.8 (t,  $J = 240.7$  Hz), 123.6 (t,  $J = 5.8$  Hz), 128.9, 129.3, 131.5, 136.3 (t,  $J = 27.0$  Hz), 138.0, 144.8 (t,  $J = 26.2$  Hz), 159.4 ppm; HRMS (ESI,  $m/z$ ): calculated for  $[\text{M}+\text{H}]^+$ : 289.1404, found: 289.1410.

### 6-(1,1-difluoro-2-(4-methoxyphenyl)allyl)-2,3-dihydrobenzo[b][1,4]dioxine

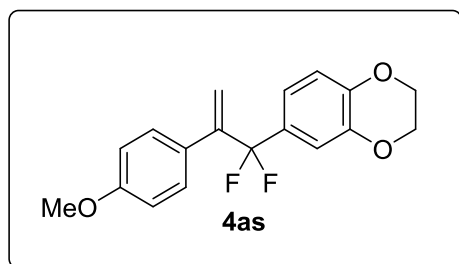

Following the experiment procedure C, **4as** was obtained in 79% yield

**<sup>1</sup>H NMR (400 MHz, CDCl<sub>3</sub>):** δ 7.28 (d, *J* = 8.8 Hz, 2H), 7.04 (d, *J* = 2.1 Hz, 1H), 6.98 (dd, *J* = 2.4, 8.8 Hz, 1H), 6.84 (d, *J* = 8.4 Hz, 1H), 6.80 (d, *J* = 9.0 Hz, 2H), 5.65 (s, 1H), 5.58 (s, 1H), 4.25 (s, 4H), 3.78 (s, 3H) ppm;

**<sup>19</sup>F NMR (376 MHz, CDCl<sub>3</sub>):** δ -89.25 ppm; **<sup>13</sup>C NMR (100 MHz, CDCl<sub>3</sub>):** δ 55.2, 64.2, 64.4, 113.5, 115.4 (t, *J* = 5.7 Hz), 117.2, 117.9 (t, *J* = 27.9 Hz), 119.3 (t, *J* = 5.5 Hz), 120.3 (t, *J* = 240.6 Hz), 128.8, 129.3, 129.7 (t, *J* = 27.9 Hz), 143.2, 144.6 (t, *J* = 26.2 Hz), 144.8, 159.4 ppm;

**HRMS (ESI, m/z):** calculated for [M+H]<sup>+</sup>: 319.1146, found: 319.1142.

#### 5-(1,1-difluoro-2-(4-methoxyphenyl)allyl)benzofuran

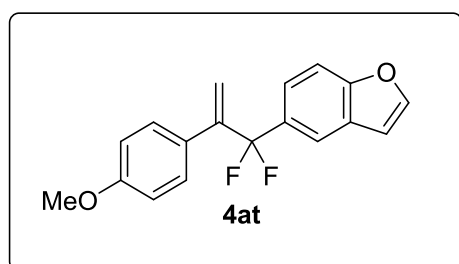

Following the experiment procedure C, **4at** was obtained in 33% yield

**<sup>1</sup>H NMR (400 MHz, CDCl<sub>3</sub>):** δ 7.79 (s, 1H), 7.66 (d, *J* = 2.2 Hz, 1H), 7.50 (d, *J* = 9.0 Hz, 1H), 7.45 (d, *J* = 8.9 Hz, 1H), 7.27 (d, *J* = 9.0 Hz, 2H), 6.80-6.78(m, 2H), 5.68 (s, 1H), 5.61 (s, 1H), 4.25 (s, 3H), 3.77 (s, 3H) ppm; **<sup>19</sup>F**

**NMR (376 MHz, CDCl<sub>3</sub>):** δ -88.62 ppm; **<sup>13</sup>C NMR (100 MHz, CDCl<sub>3</sub>):**

$\delta$  55.2, 106.9, 111.3, 113.5, 118.0 (t,  $J=7.9$  Hz), 119.3 (t,  $J=6.1$  Hz), 120.9 (t,  $J=240.9$  Hz), 121.3, 122.4 (t,  $J=5.3$  Hz), 127.2, 128.9, 129.3, 131.1 (t,  $J=27.2$  Hz), 145.0 (t,  $J=26.4$  Hz), 146.0, 159.4 ppm; **HRMS (ESI, m/z)**: calculated for  $[M+H]^+$ :301.1040, found: 301.1042.

### 3-(1,1-difluoro-2-(4-methoxyphenyl)allyl)-9-phenyl-9H-carbazole

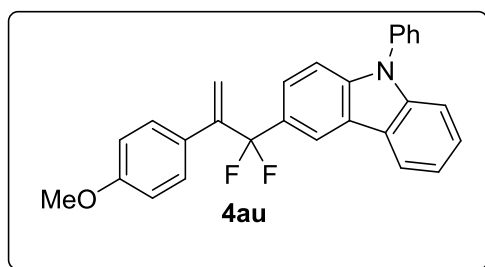

Following the experiment procedure **C**, **4au** was obtained in 45% yield

**$^1\text{H}$  NMR (400 MHz,  $\text{CDCl}_3$ )**:  $\delta$  8.33 (s, 1H), 8.15 (d,  $J=7.7$  Hz, 1H), 7.62 (t,  $J=7.7$  Hz, 2H), 7.56-7.53 (m, 3H), 7.51-7.46 (m, 1H), 7.44-7.42 (m, 2H), 7.38 (d,  $J=8.6$  Hz, 1H), 7.34-7.29 (m, 3H), 6.80 (d,  $J=8.7$  Hz, 2H), 5.76 (s, 1H), 5.66 (s, 1H), 3.76 (s, 3H) ppm;  **$^{19}\text{F}$  NMR (376 MHz,  $\text{CDCl}_3$ )**:  $\delta$  -87.77 ppm;  **$^{13}\text{C}$  NMR (100 MHz,  $\text{CDCl}_3$ )**:  $\delta$  55.2, 109.6, 110.0, 113.5, 118.0 (t,  $J=7.9$  Hz), 118.3 (t,  $J=6.0$  Hz), 120.4, 120.5, 121.4 (t,  $J=241.2$  Hz), 123.0, 123.1, 123.9 (t,  $J=5.4$  Hz), 126.5, 127.1, 127.8, 128.1 (t,  $J=27.5$  Hz), 129.1, 129.4, 129.9, 130.0, 137.3, 141.4, 145.2 (t,  $J=26.1$  Hz), 159.4 ppm; **HRMS (ESI, m/z)**: calculated for  $[M+H]^+$ : 426.1669, found: 426.1675.

### 4-(1,1-difluoro-2-(4-methoxyphenyl)allyl)-2-fluoropyridine

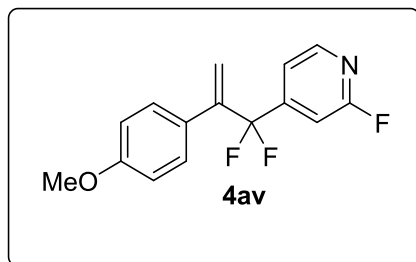

Following the experiment procedure **C**, **4av** was obtained in 50% yield

**<sup>1</sup>H NMR (400 MHz, CDCl<sub>3</sub>):** δ 8.22 (d, *J* = 5.1 Hz, 1H), 7.23-7.18 (m, 3H), 6.98 (s, 1H), 6.79 (d, *J* = 8.8 Hz, 2H), 5.69 (s, 1H), 5.59 (s, 1H), 3.76 (s, 3H) ppm; **<sup>19</sup>F NMR (376 MHz, CDCl<sub>3</sub>):** δ -65.90, -94.36 ppm; **<sup>13</sup>C NMR (100 MHz, CDCl<sub>3</sub>):** δ 55.2, 107.0 (dt, *J* = 5.9, 39.4 Hz), 113.8, 118.3 (dd, *J* = 4.7, 9.5 Hz), 118.5 (d, *J* = 3.4 Hz), 119.1 (t, *J* = 8.2 Hz), 127.5, 129.4, 143.3 (t, *J* = 24.5 Hz), 148.3 (d, *J* = 14.6 Hz), 150.3 (d, *J* = 7.6 Hz), 159.9, 163.7 (d, *J* = 238.4 Hz) ppm; **HRMS (ESI, m/z):** calculated for [M+H]<sup>+</sup>: 280.0949, found: 280.0942.

**tert-butyl 4-(1,1-difluoro-2-(4-methoxyphenyl)allyl)-3,6-dihydropyridine-1(2H)-carboxylate**

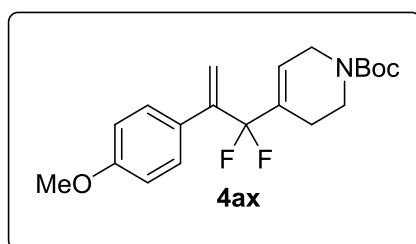

Following the experiment procedure **C**, **4ax** was obtained in 34% yield

**<sup>1</sup>H NMR (400 MHz, CDCl<sub>3</sub>):** δ 7.30 (d, *J* = 8.4 Hz, 2H), 6.84 (d, *J* = 8.7 Hz, 2H), 6.04 (s, 1H), 5.66 (s, 1H), 5.56 (s, 1H), 3.92 (s, 2H), 3.81 (s, 3H), 3.45 (t, *J* = 5.6 Hz, 2H), 2.15 (s, 2H), 1.45 (s, 9H) ppm; **<sup>19</sup>F NMR (376**

**MHz, CDCl<sub>3</sub>):**  $\delta$  -97.35 (d,  $J$  = 82.94 Hz) ppm; **<sup>13</sup>C NMR (100 MHz, CDCl<sub>3</sub>):**  $\delta$  15.2, 23.5, 28.4, 29.7, 55.3, 79.9, 113.6, 118.2 (t,  $J$  = 7.5 Hz), 120.0 (t,  $J$  = 240.6 Hz), 128.7, 129.2, 129.5, 132.1 (t,  $J$  = 9.8 Hz) 143.0 (t,  $J$  = 25.2 Hz), 154.8, 159.6 ppm; **HRMS (ESI, m/z):** calculated for [M+H]<sup>+</sup>: 366.1881, found: 366.1888.

**1-(3-(cyclohex-1-en-1-yl)-3,3-difluoroprop-1-en-2-yl)-4-methoxybenzene**

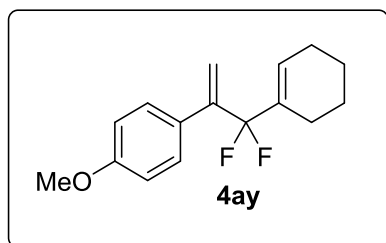

Following the experiment procedure **C**, **4ay** was obtained in 56% yield

**<sup>1</sup>H NMR (400 MHz, CDCl<sub>3</sub>):**  $\delta$  7.33 (d,  $J$  = 8.7 Hz, 2H), 6.84 (d,  $J$  = 8.7 Hz, 2H), 6.09 (s, 1H), 5.64 (s, 1H), 5.53 (s, 1H), 3.81 (s, 3H), 2.04 (s, 4H), 1.64-1.51 (m, 4H) ppm; **<sup>19</sup>F NMR (376 MHz, CDCl<sub>3</sub>):**  $\delta$  -96.75 ppm; **<sup>13</sup>C NMR (100 MHz, CDCl<sub>3</sub>):**  $\delta$  21.7, 22.0, 23.0, 24.7, 55.2, 113.4, 117.6 (t,  $J$  = 8.1 Hz), 120.9 (t,  $J$  = 237.1 Hz), 128.6 (t,  $J$  = 9.0 Hz), 129.2, 129.3, 133.0 (t,  $J$  = 25.1 Hz), 143.6 (t,  $J$  = 26.2 Hz), 159.4 ppm; **HRMS (ESI, m/z):** calculated for [M+H]<sup>+</sup>: 265.1404, found: 265.1397.

**(8R,9S,13S,14S)-3-(1,1-difluoro-2-(4-methoxyphenyl)allyl)-13,14-dimethyl-6,7,8,9,11,12,13,14,15,16-decahydro-17H-cyclopenta[a]phenanthrene-17-one**



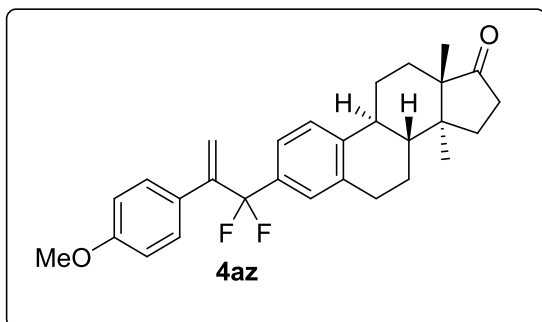

Following the experiment procedure **C**, **4az** was obtained in 57% yield

**<sup>1</sup>H NMR (400 MHz, CDCl<sub>3</sub>):** δ 7.31-7.28 (m, 3H), 7.25 (ds, 2H), 6.81 (d, *J* = 8.8 Hz, 2H), 5.63 (s, 1H), 5.59 (s, 1H), 3.78 (s, 3H), 2.91 (dd, *J* = 4.4, 9.1 Hz, 2H), 2.51 (dd, *J* = 9.2, 19.5 Hz, 1H), 2.44-2.39 (m, 1H), 2.30 (t, *J* = 10.1 Hz, 1H), 2.20-1.95 (m, 4H), 1.66-1.42 (m, 8H), 0.91 (s, 3H) ppm;  
**<sup>19</sup>F NMR (376 MHz, CDCl<sub>3</sub>):** δ -89.86 ppm; **<sup>13</sup>C NMR (100 MHz, CDCl<sub>3</sub>):** δ 13.8, 21.6, 25.6, 26.4, 29.4, 31.5, 35.9, 37.9, 44.4, 47.9, 50.5, 55.2, 113.5, 118.1 (t, *J* = 7.9 Hz), 120.7 (t, *J* = 240.6 Hz), 123.3 (t, *J* = 5.5 Hz), 125.3, 126.4 (t, *J* = 5.5 Hz), 128.9, 129.3, 133.9 (t, *J* = 27.0 Hz), 136.6, 141.6, 144.6 (t, *J* = 25.9 Hz), 159.4 ppm; **HRMS (ESI, m/z):** calculated for [M+H]<sup>+</sup>: 437.2292, found: 437.2293

**(E)-(1-fluoro-2-(4-methoxyphenyl)prop-1-ene-1,3-diyl)dibenzene**

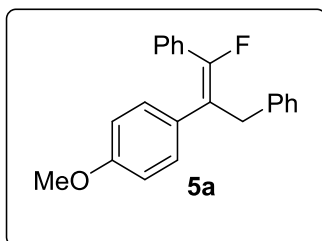

Following the experiment procedure **D**, **5a** was obtained in 48% yield

**<sup>1</sup>H NMR (400 MHz, CDCl<sub>3</sub>):** δ 7.55-7.52 (m, 2H), 7.40-7.36 (m, 5H), 7.26-7.22 (m, 2H), 7.19-7.13 (m, 2H), 6.85 (d, *J* = 8.5 Hz, 2H), 3.89 (s,

2H), 3.78 (s, 3H) ppm;  $^{19}\text{F}$  NMR (376 MHz,  $\text{CDCl}_3$ ):  $\delta$  -99.75 (d,  $J$  = 82.94 Hz) ppm;  $^{13}\text{C}$  NMR (100 MHz,  $\text{CDCl}_3$ ):  $\delta$  37.3 (d,  $J$  = 3.5 Hz), 55.2, 113.6, 117.1 (d,  $J$  = 15.4 Hz), 126.1, 128.1 (d,  $J$  = 4.4 Hz), 128.3 (d,  $J$  = 1.2 Hz), 128.5, 129.0, 129.1 (d,  $J$  = 1.2 Hz), 130.0 (d,  $J$  = 4.3 Hz), 113.0 (d,  $J$  = 29.2 Hz), 139.4 (d,  $J$  = 3.5 Hz), 154.6 (d,  $J$  = 246.7 Hz), 158.6 ppm; HRMS (ESI,  $m/z$ ): calculated for  $[\text{M}+\text{H}]^+$ : 319.1498, found: 319.1503.

### 3,3-difluoro-2-(4-methoxyphenyl)-3-phenylpropane-1,2-diol

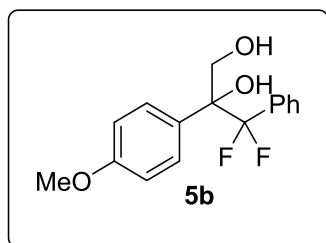

Following the experiment procedure **E**, **5b** was obtained in 48% yield

$^1\text{H}$  NMR (400 MHz,  $\text{CDCl}_3$ ): 7.34 (t,  $J$  = 7.0 Hz, 1H), 7.23 (dd,  $J$  = 8.2, 16.4 Hz, 4H), 7.12 (d,  $J$  = 7.7 Hz, 2H), 6.79 (d,  $J$  = 8.9 Hz, 2H), 4.44 (d,  $J$  = 12.0 Hz, 1H), 4.04 (d,  $J$  = 11.6 Hz, 1H), 3.78 (s, 3H), 3.48 (s, 1H) ppm;  $^{19}\text{F}$  NMR (376 MHz,  $\text{CDCl}_3$ ):  $\delta$  -105.04 (d,  $J$  = 246.48 Hz), -106.83 (d,  $J$  = 246.53 Hz) ppm;  $^{13}\text{C}$  NMR (100 MHz,  $\text{CDCl}_3$ ):  $\delta$  55.2, 65.0 (t,  $J$  = 2.7 Hz), 78.0 (dd,  $J$  = 25.8, 29.4 Hz), 113.4, 122.6 (t,  $J$  = 251.0 Hz), 126.9 (t,  $J$  = 6.5 Hz), 127.4, 128.1, 129.3 (d,  $J$  = 3.6 Hz), 129.7, 133.6 (t,  $J$  = 25.8 Hz), 159.4 ppm; HRMS (ESI,  $m/z$ ): calculated for  $[\text{M}+\text{H}]^+$ : 295.1146, found: 295.1141.

n-3-20A.1.1.1r

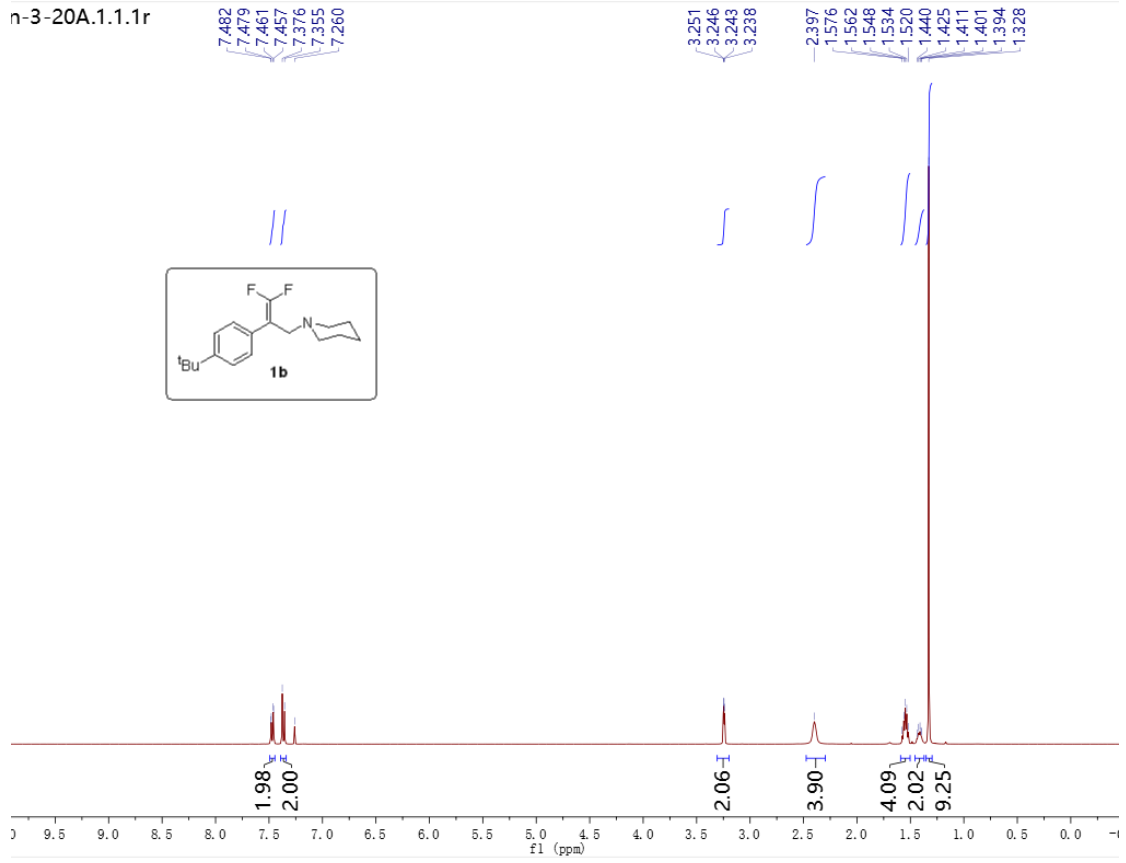

n-3-20A.2.1.1r

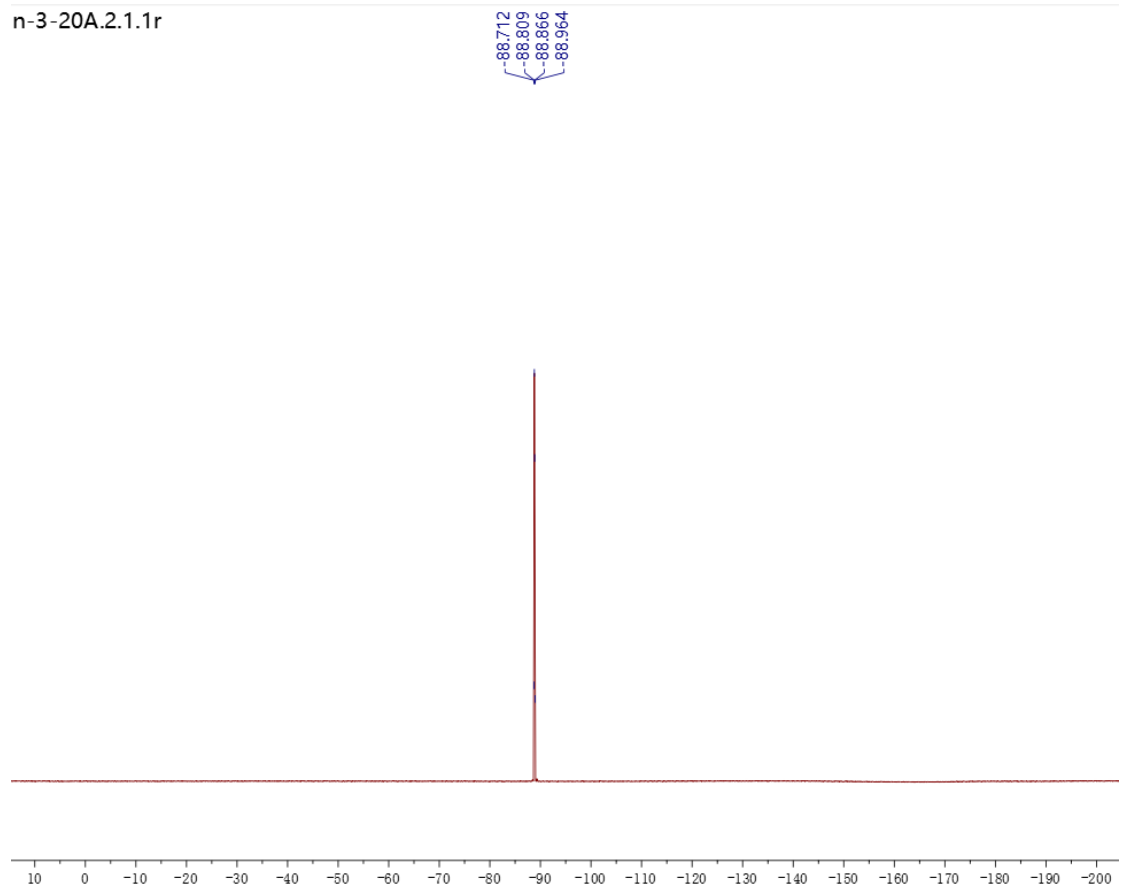

TLN-3-20A

angle pulse decoupled gated NOE

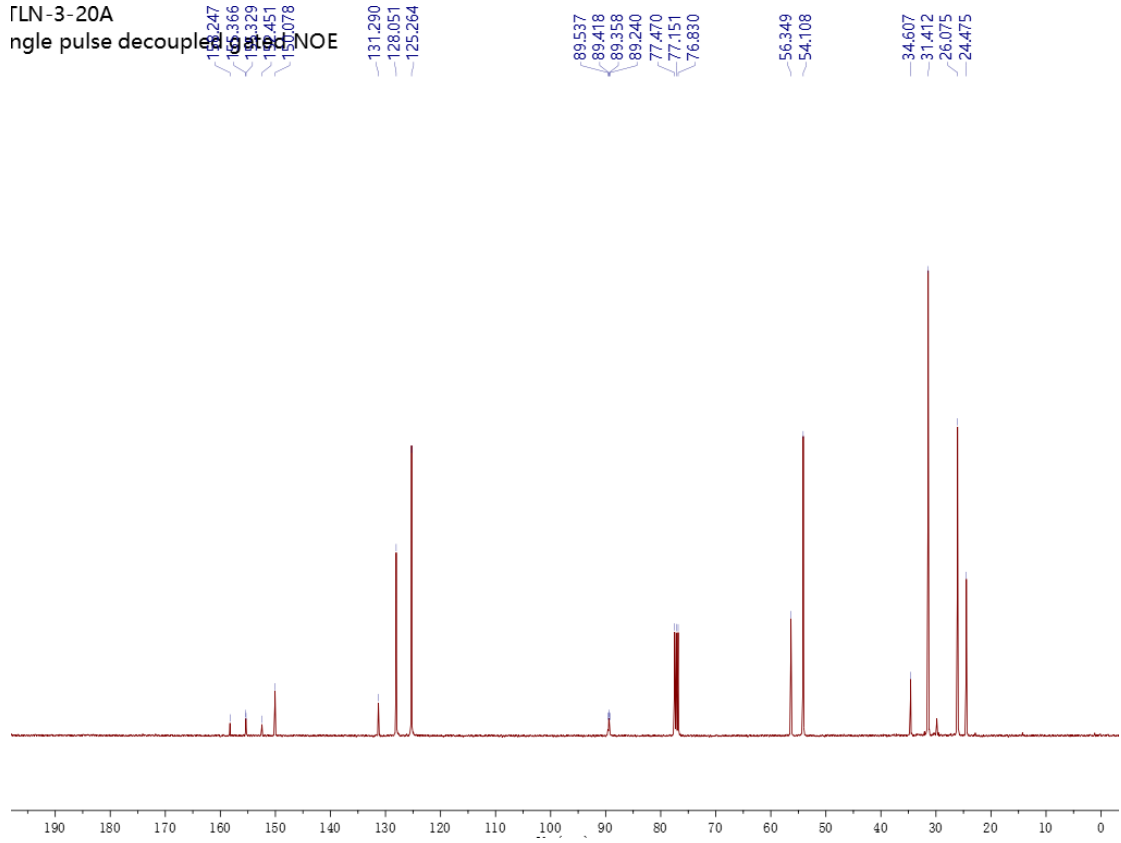

TLN-3-20Q-1.1.1.1r

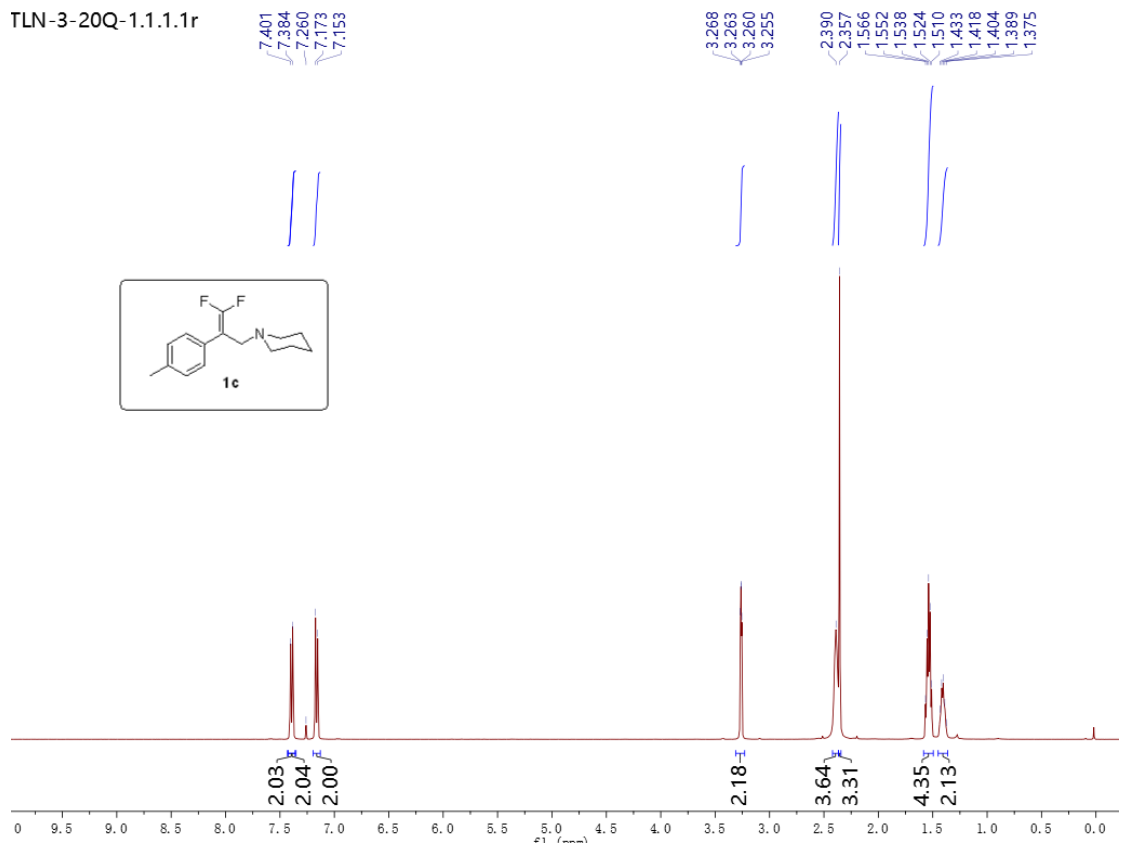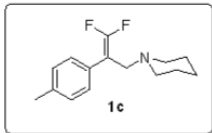

3-20Q-1.7.1.1r

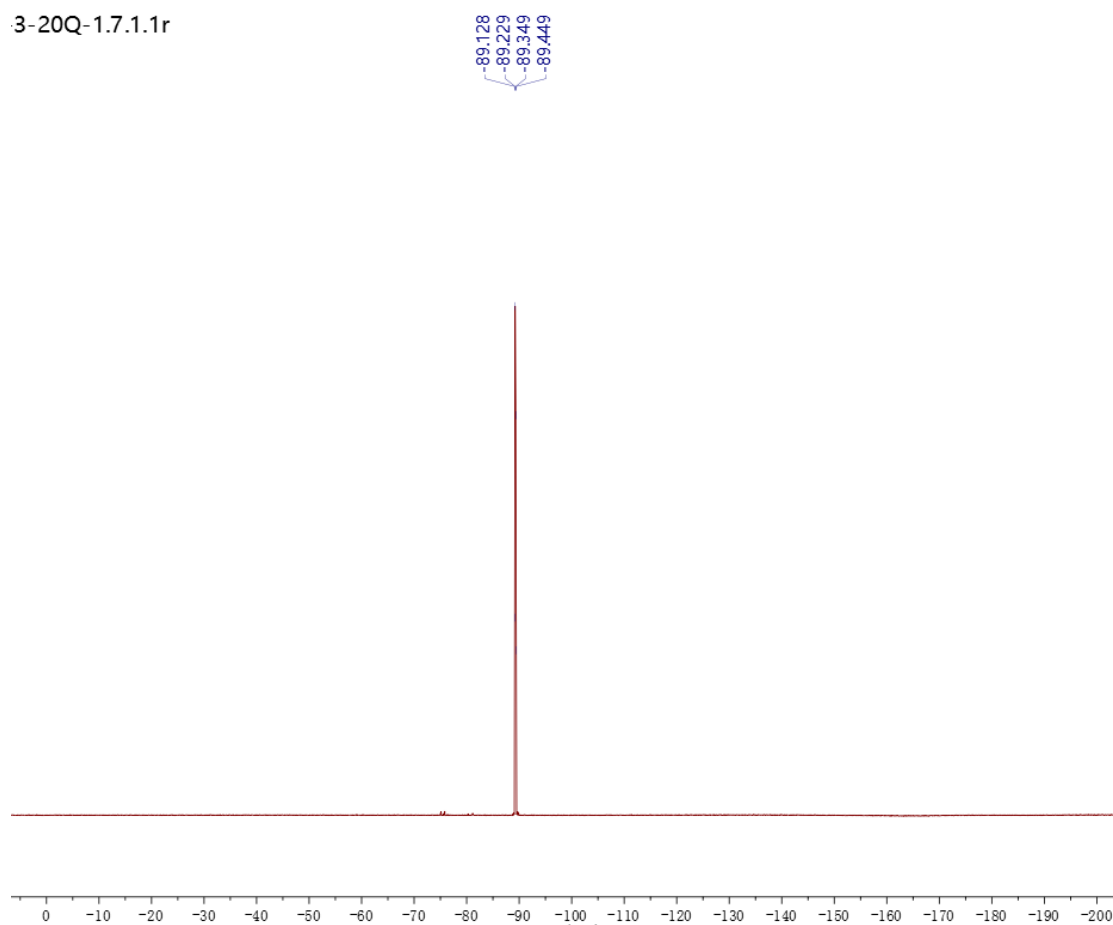

TLN-3-20Q-1.2.1.1r

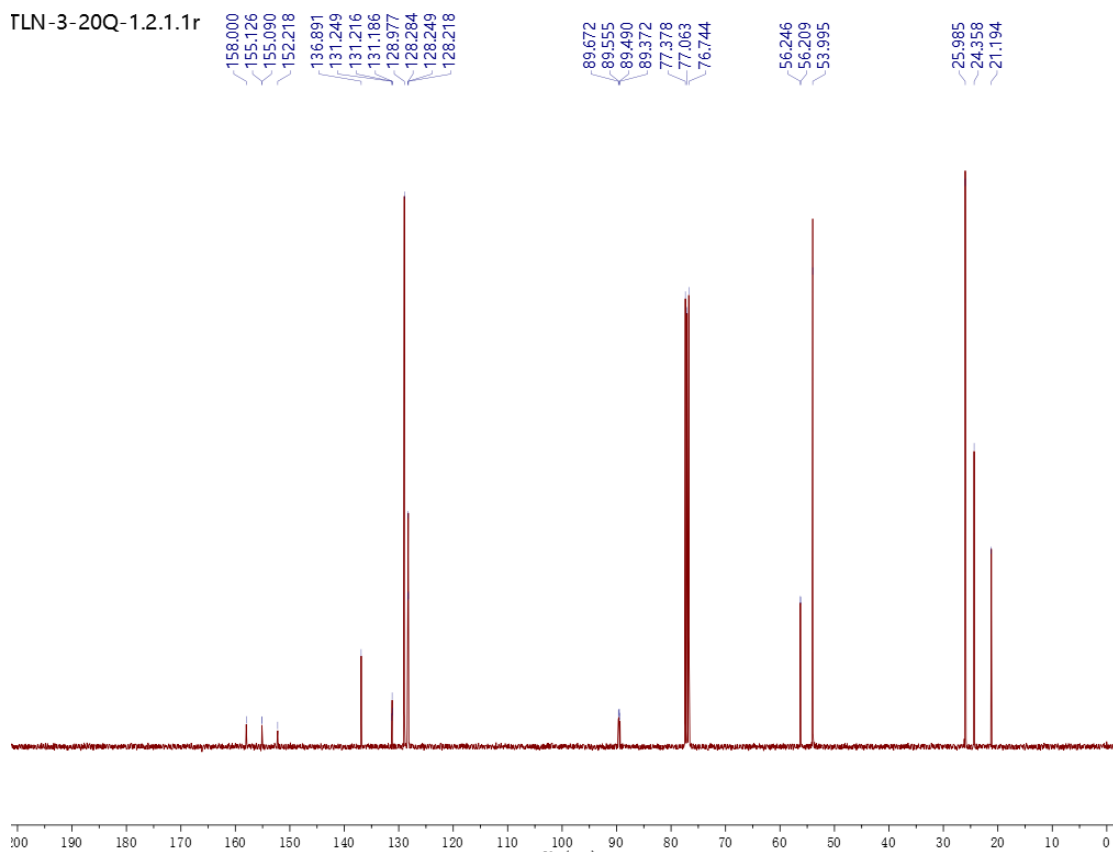

N-3-20F-1.1.1.1r

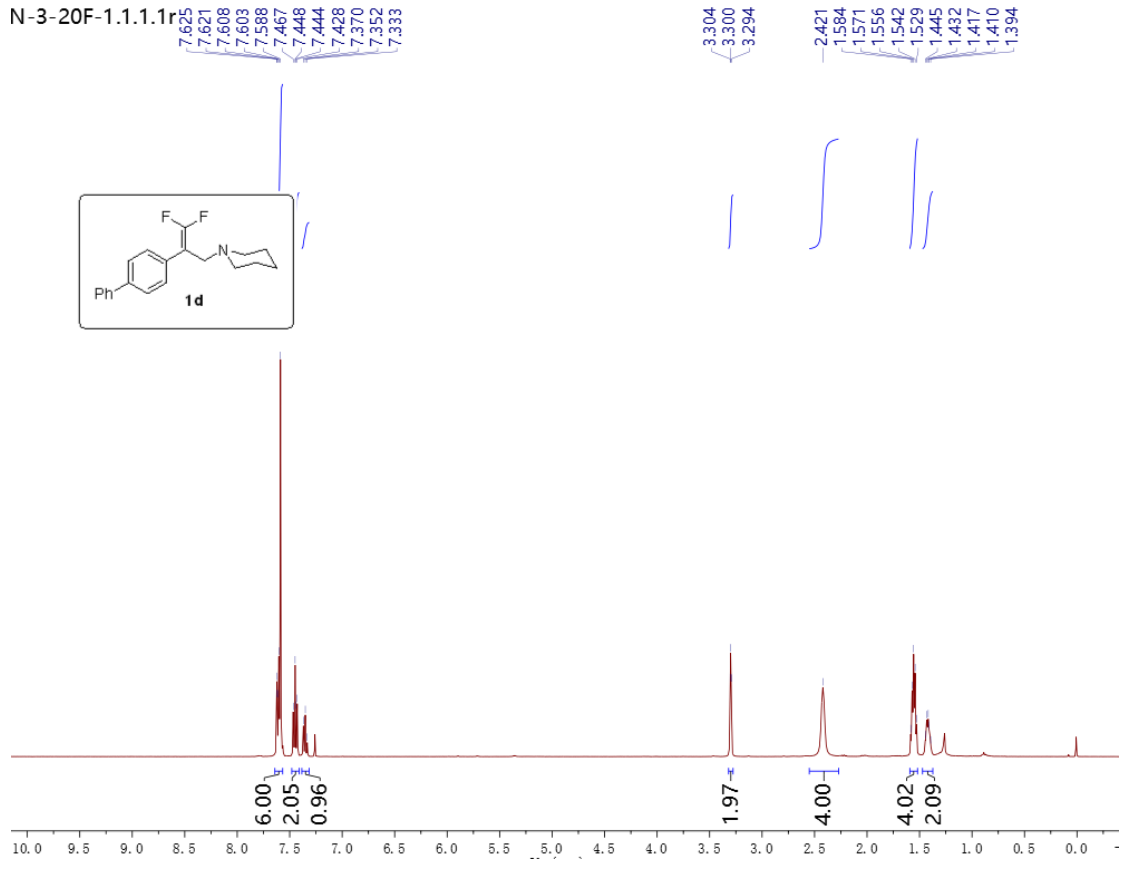

N-3-20F-1.7.1.1r

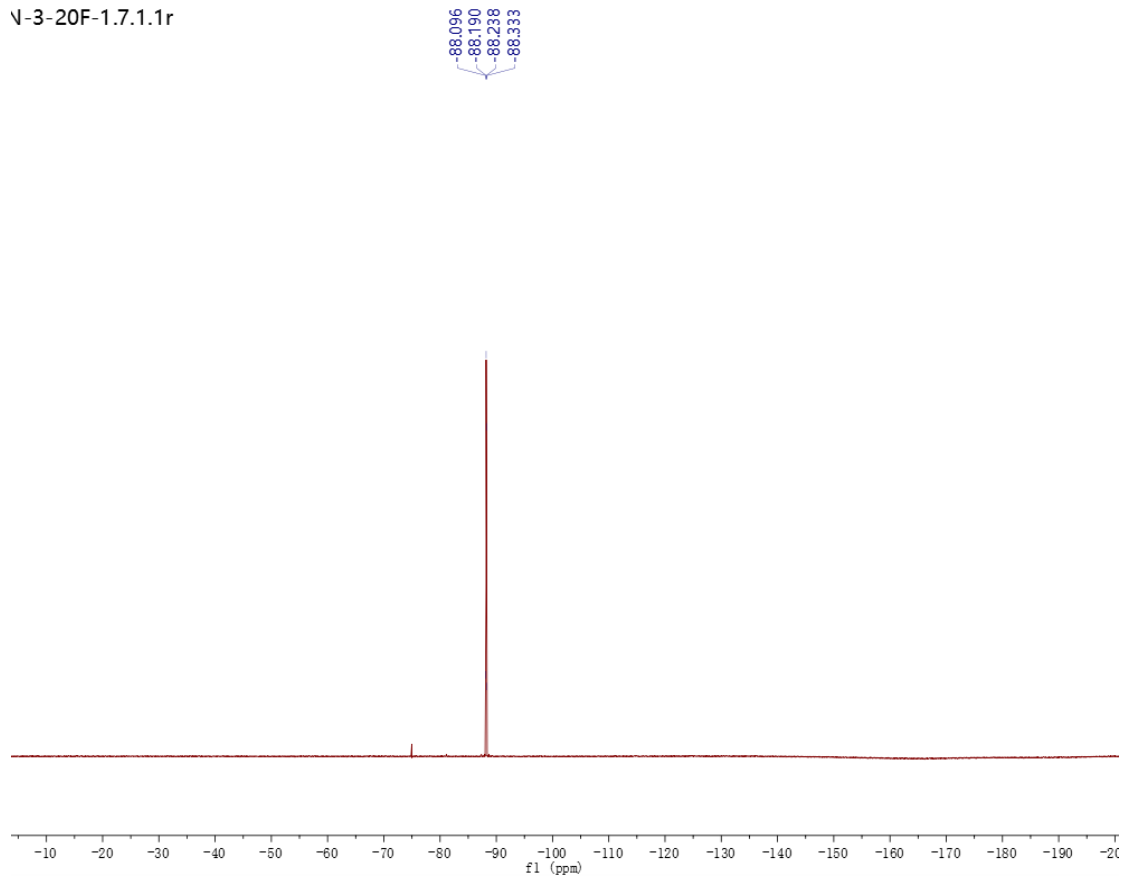

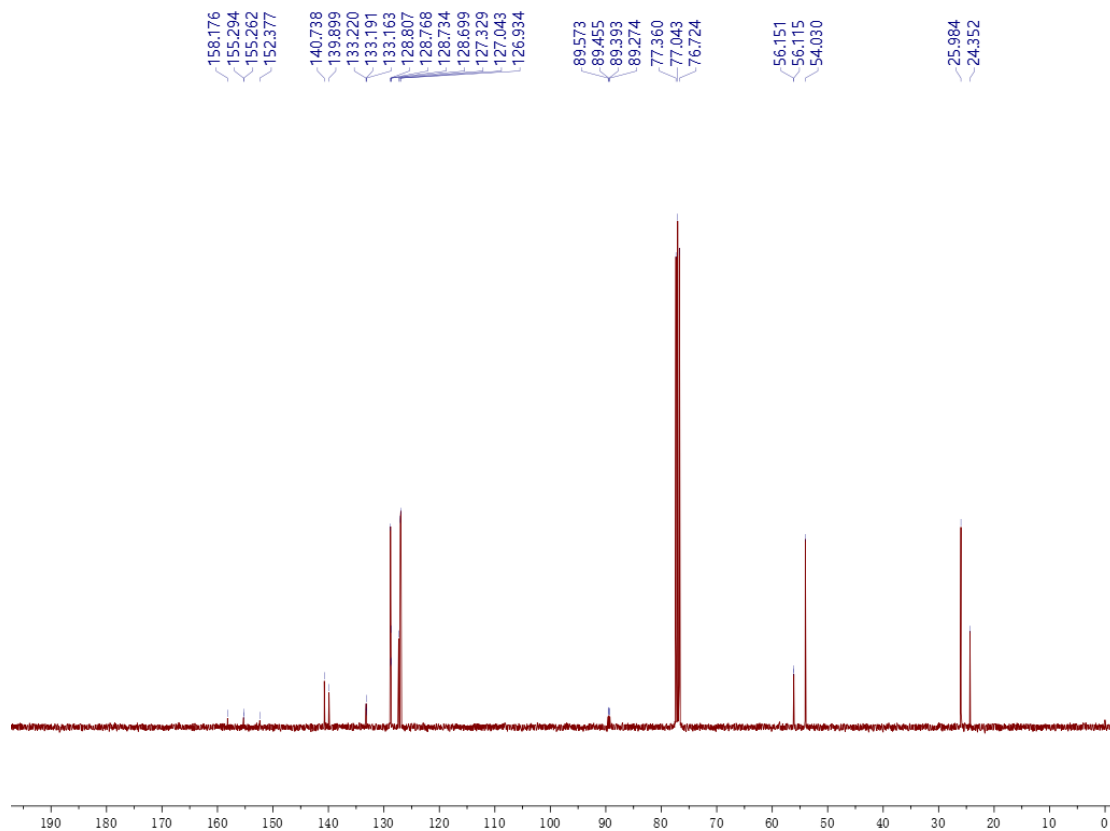

TLN-3-20G-1.1.1.1r

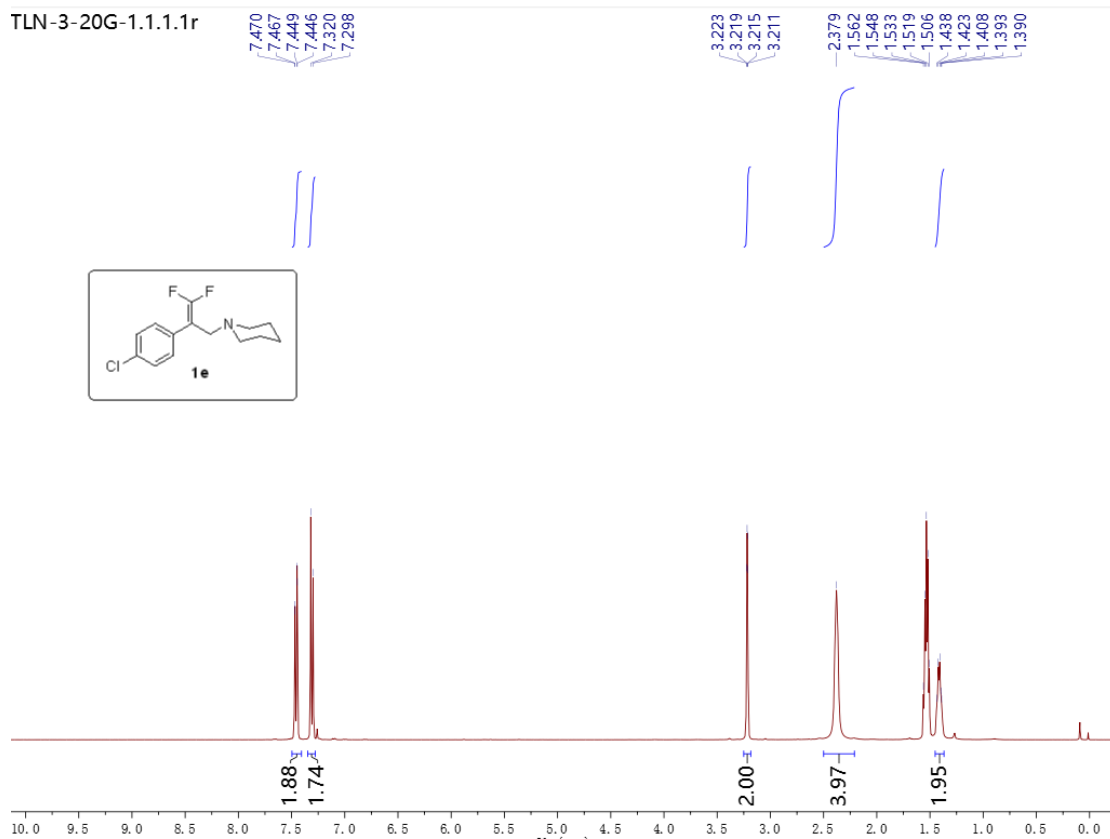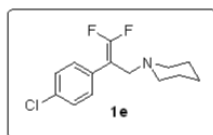

3-20G-1.7.1.1r

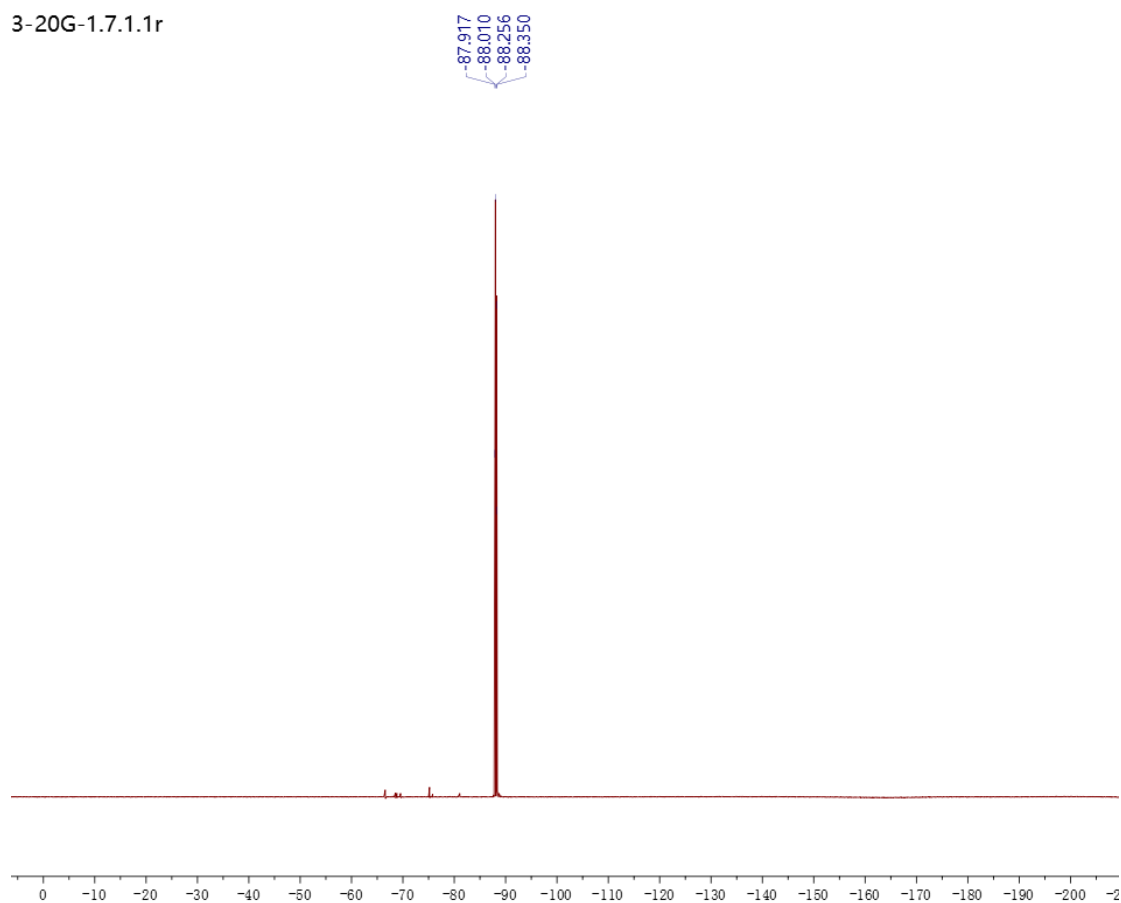

N-3-20G-1.2.1.1r

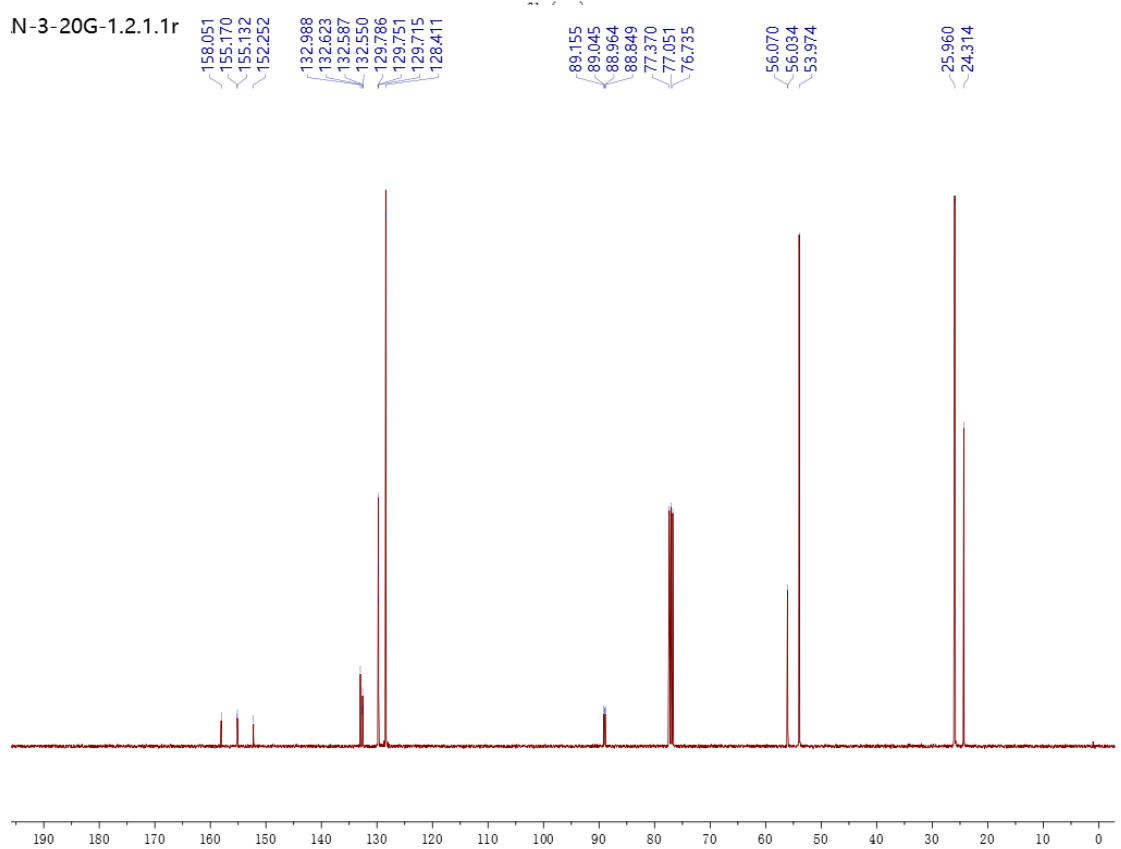



LN-3-20N-1.1.1.1r

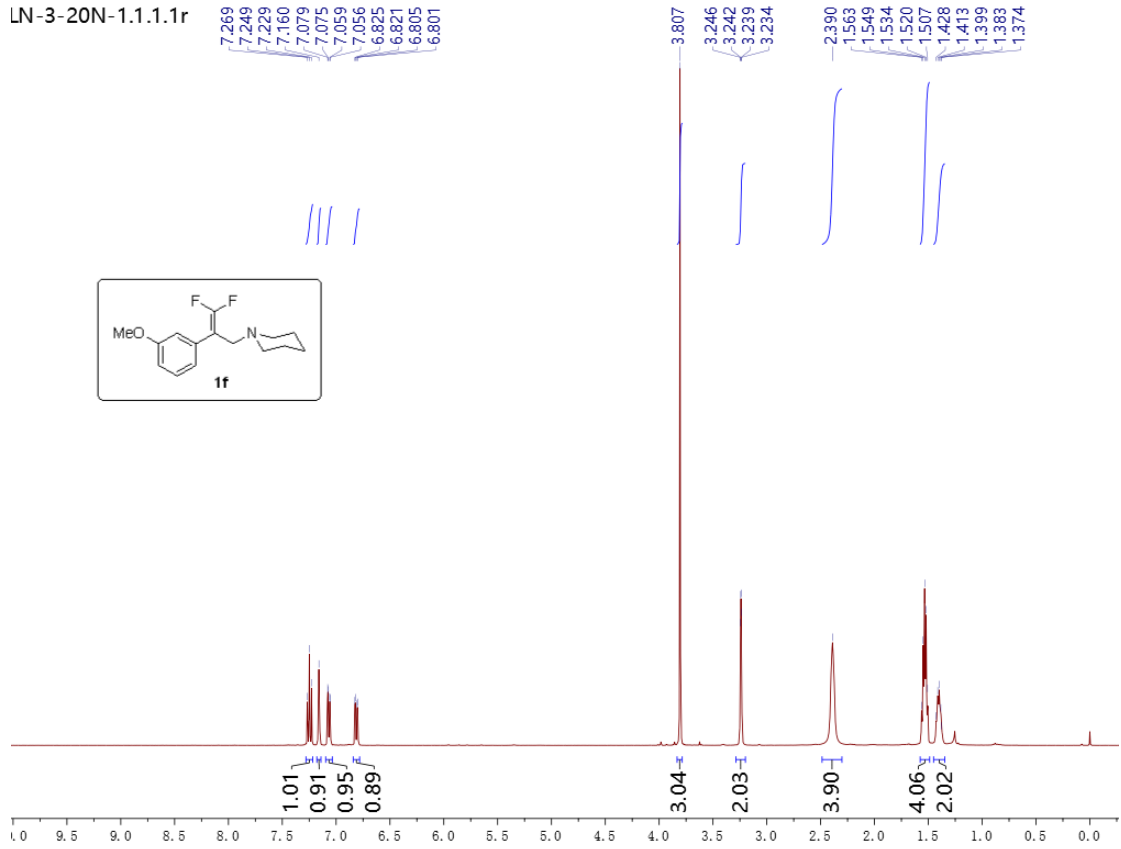

-3-20N-1.7.1.1r

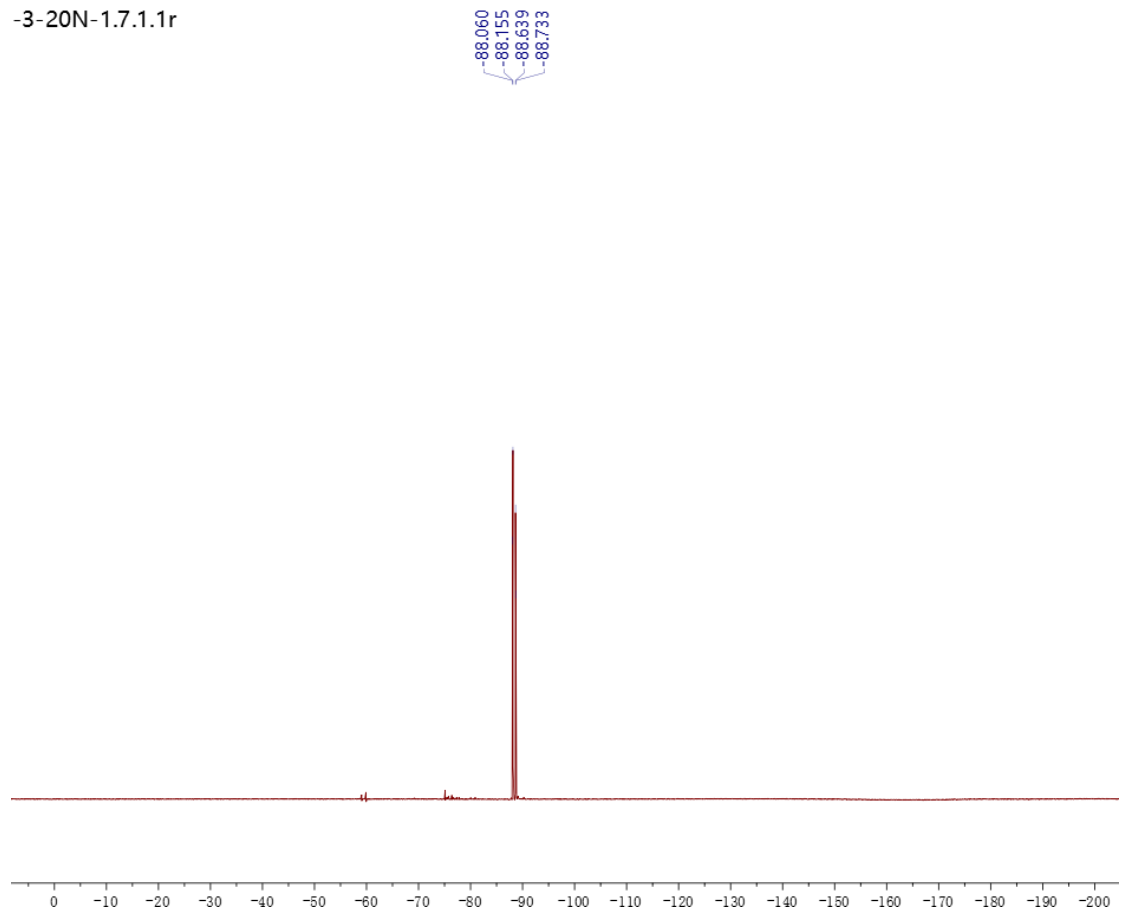

FLN-3-20N-1.2.1.1r

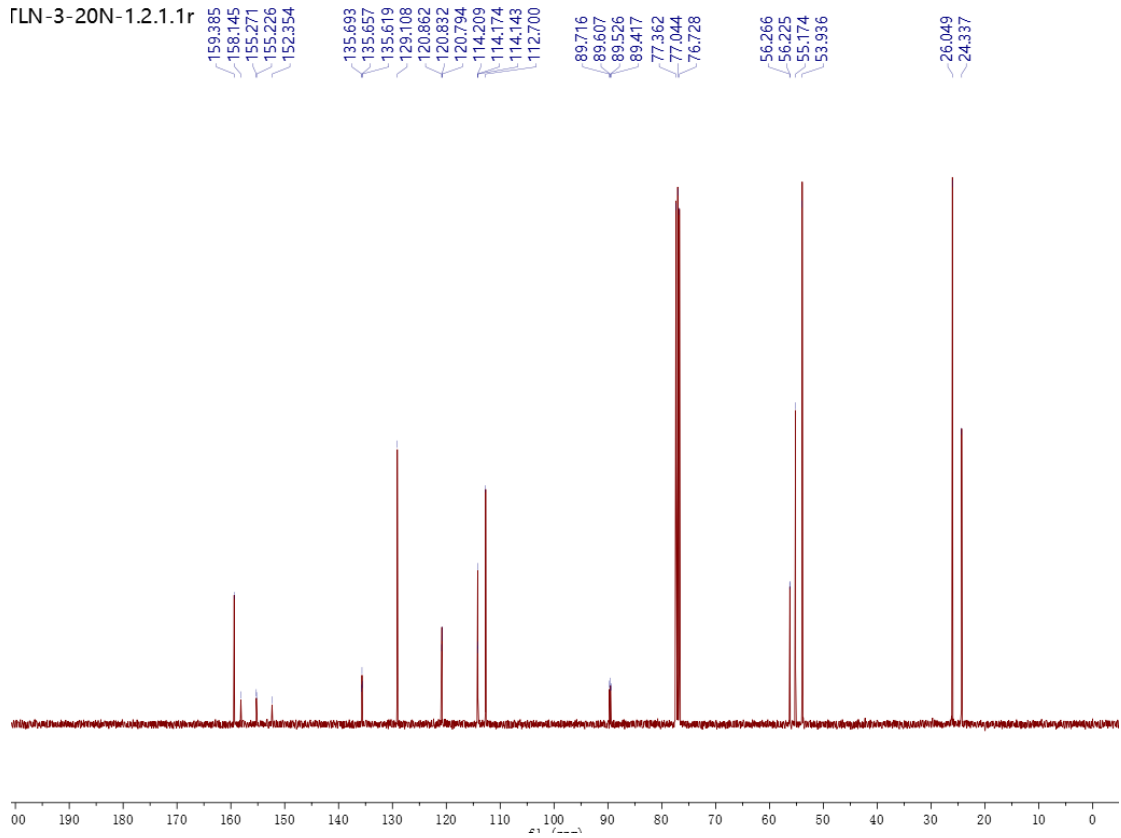

LN-3-20M-1.1

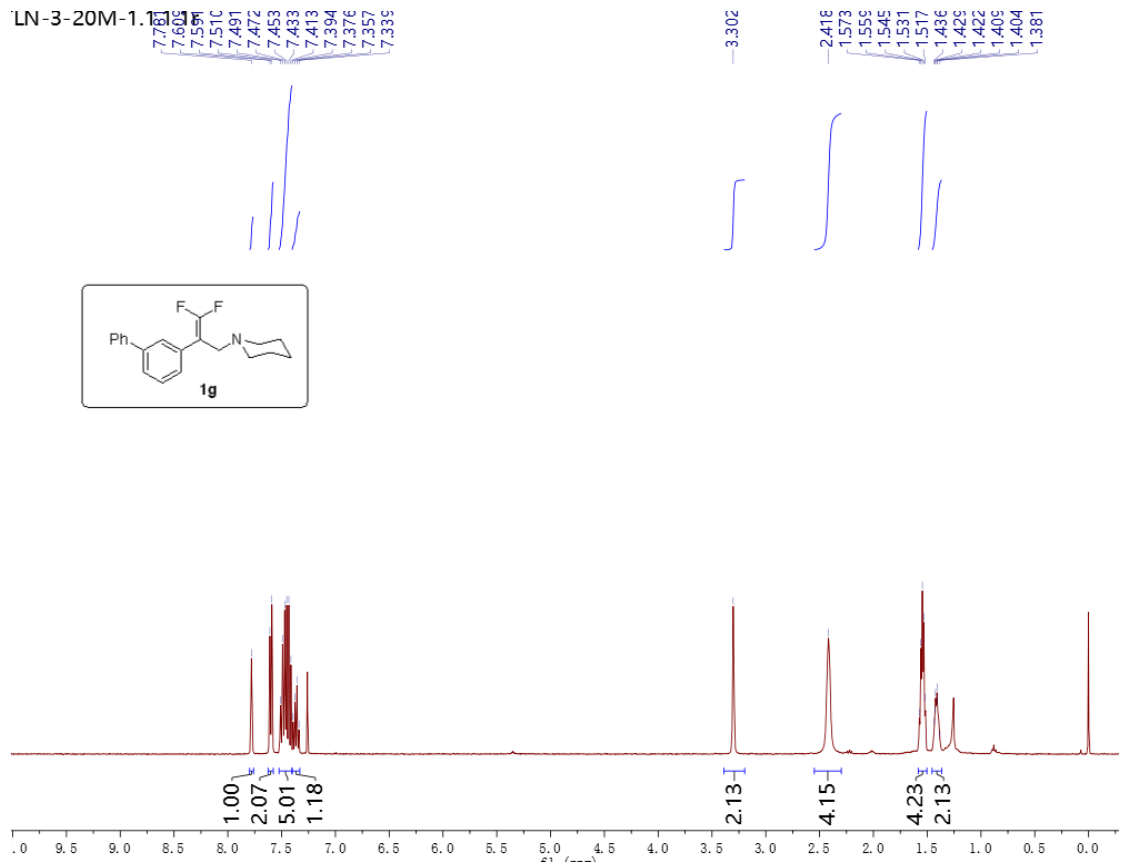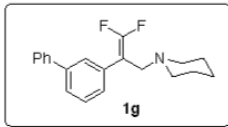

-20M-1.7.1.1r

-88.310  
-88.405  
-88.654  
-88.751

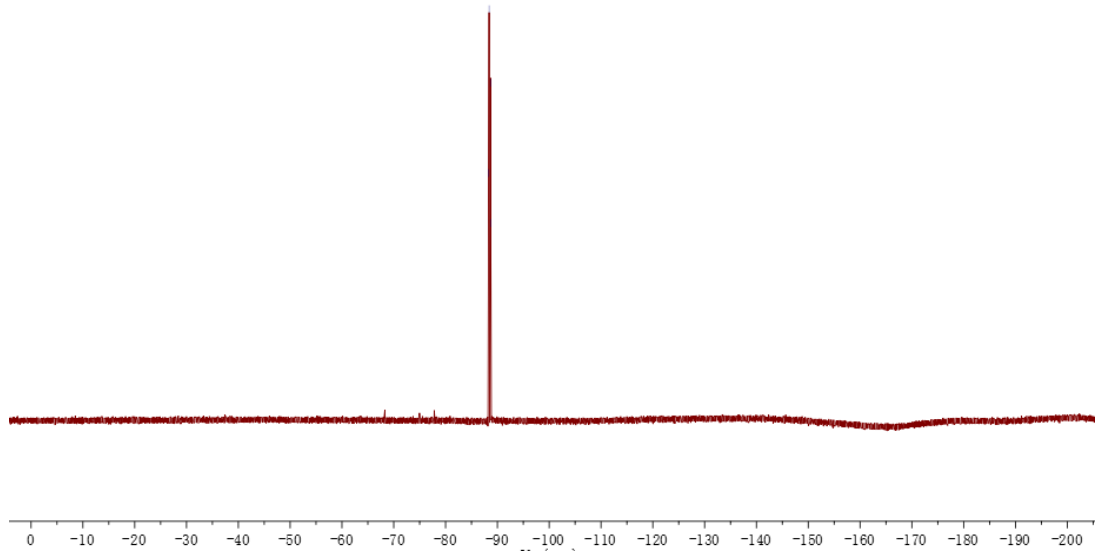

-20M-1.2.1.1r

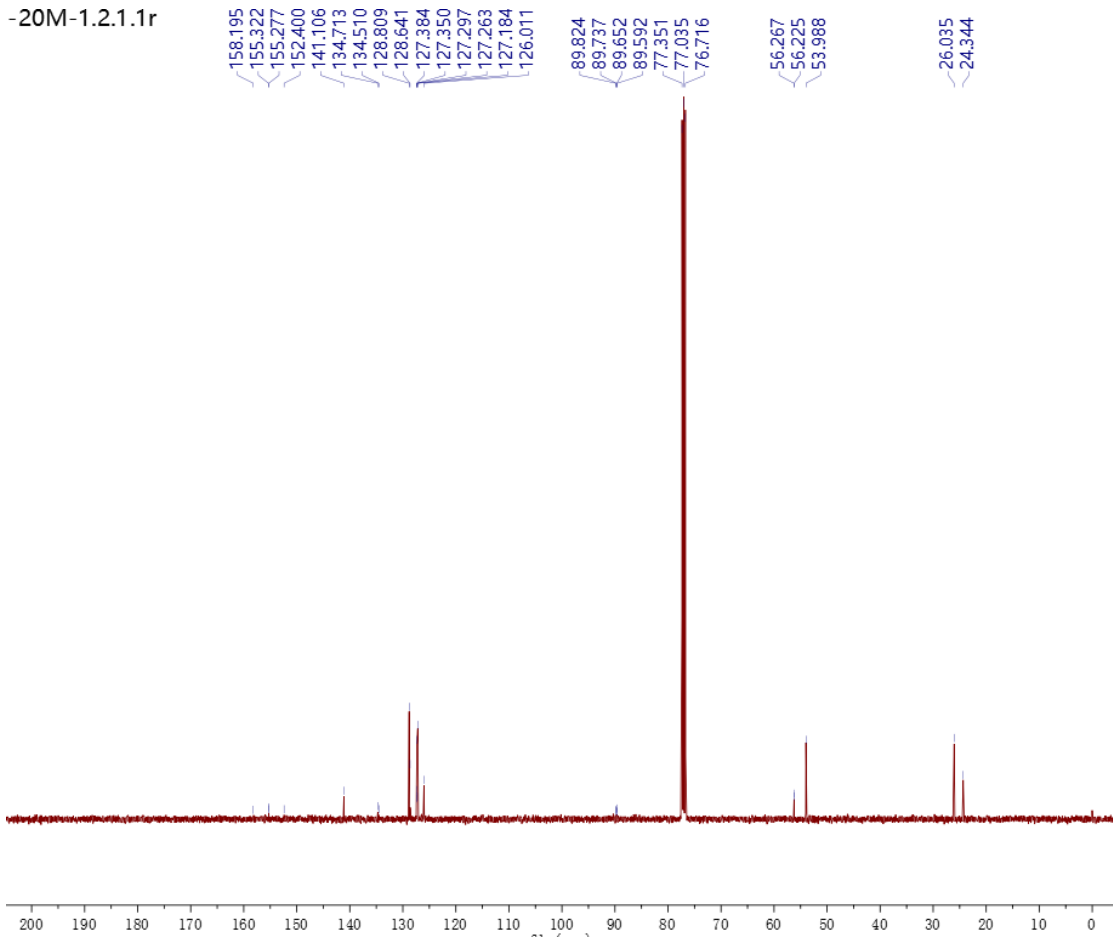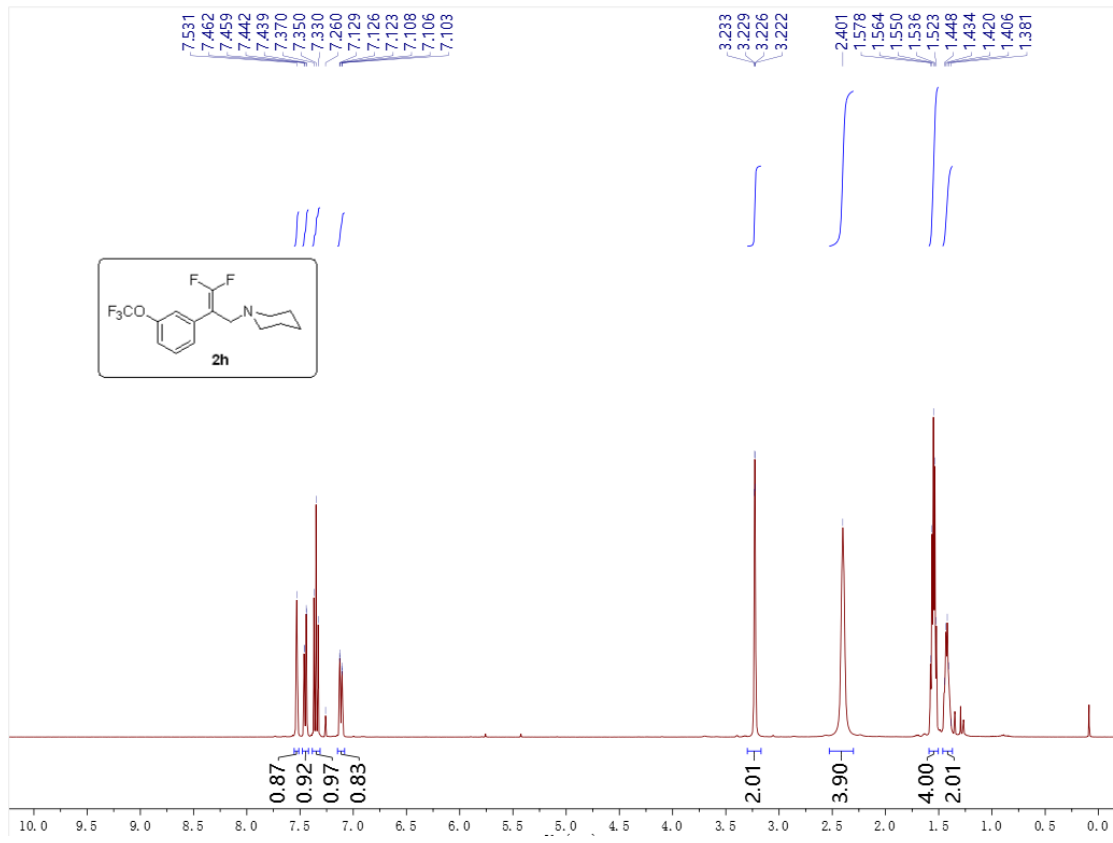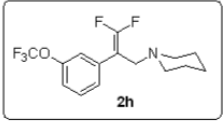

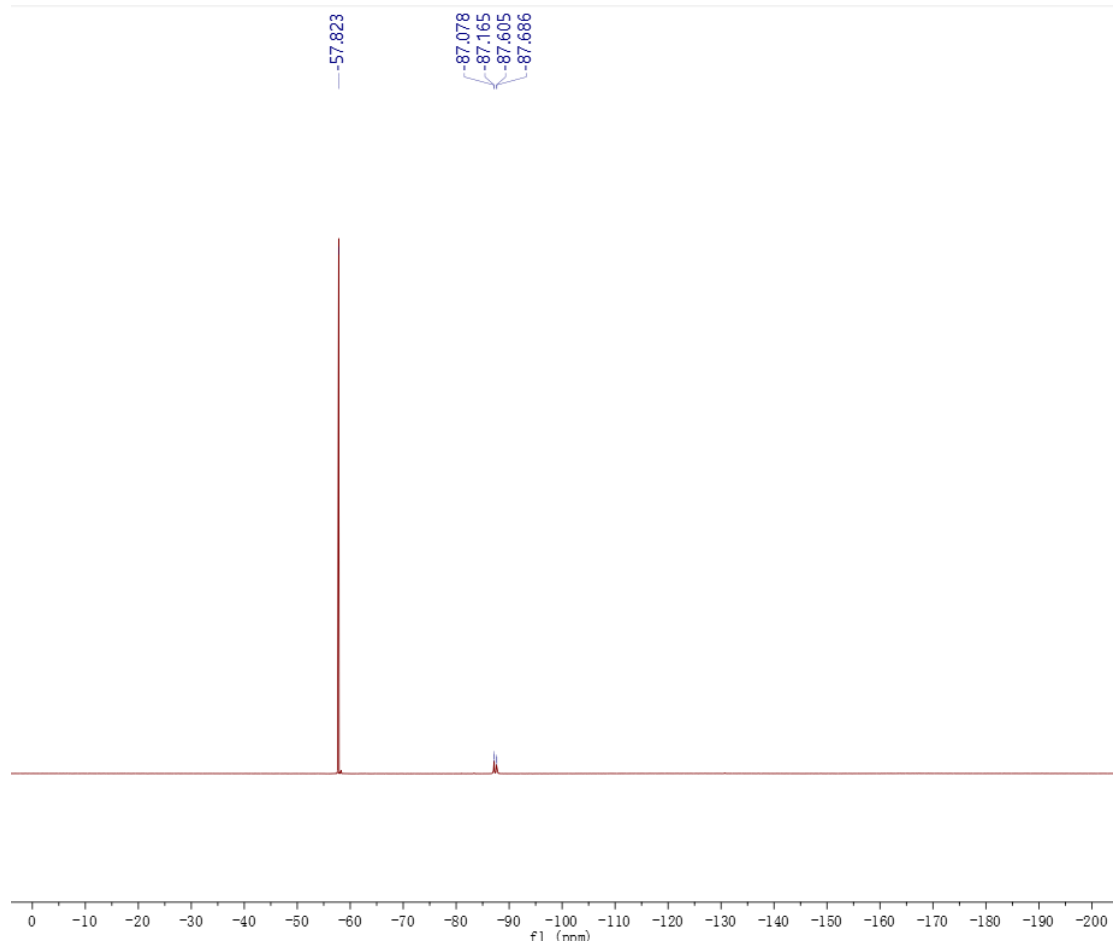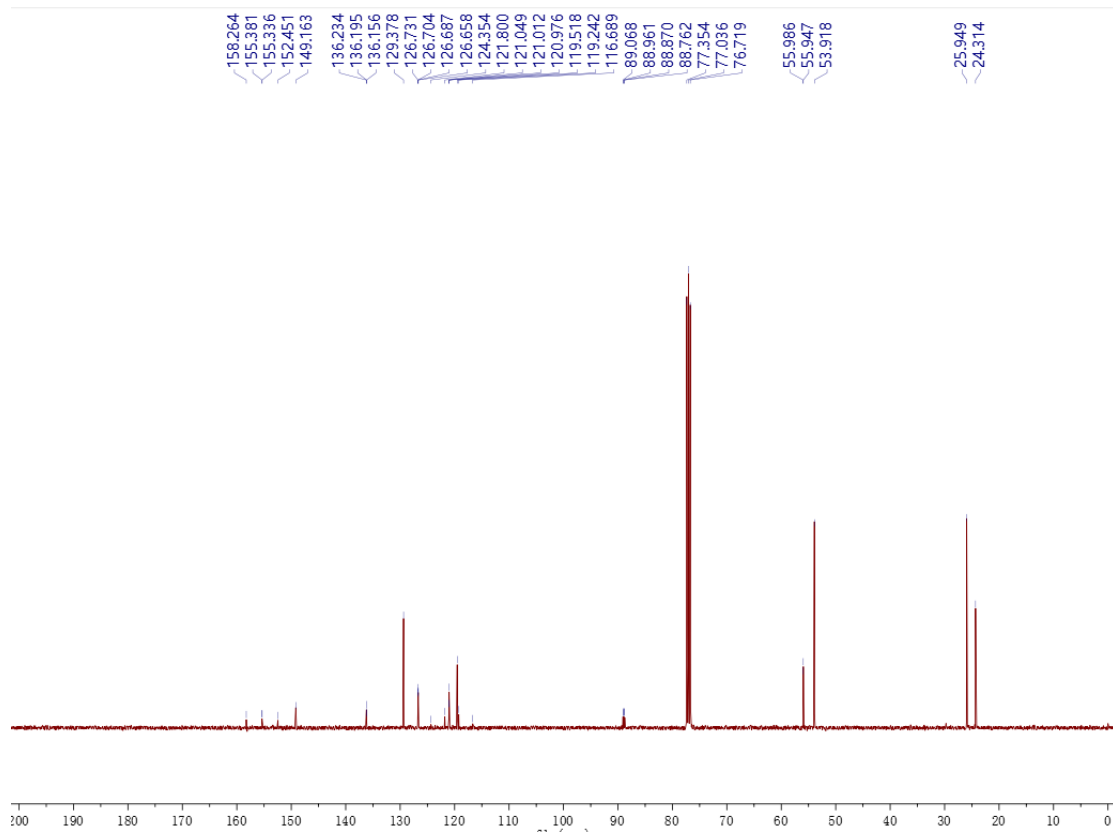

LN-3-20Z-1.1.1.1r

7.475  
7.456  
7.312  
7.293  
7.273  
7.166  
7.147  
7.092  
7.079  
7.070  
7.061  
7.043

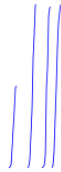

3.272

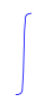

2.459  
1.625  
1.611  
1.598  
1.584  
1.568  
1.494  
1.477  
1.477  
1.465  
1.459  
1.436

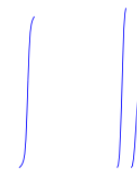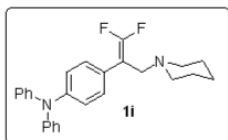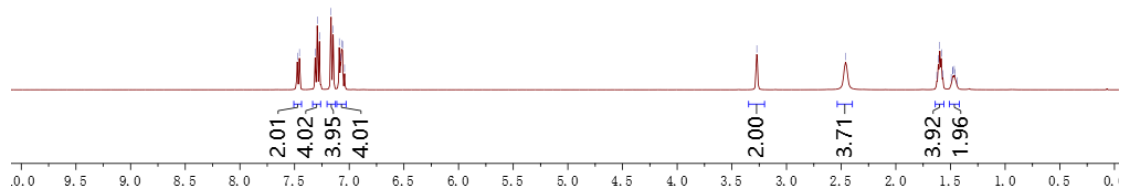

3-20Z-1.7.1.1r

88.500  
88.599  
88.909  
89.008

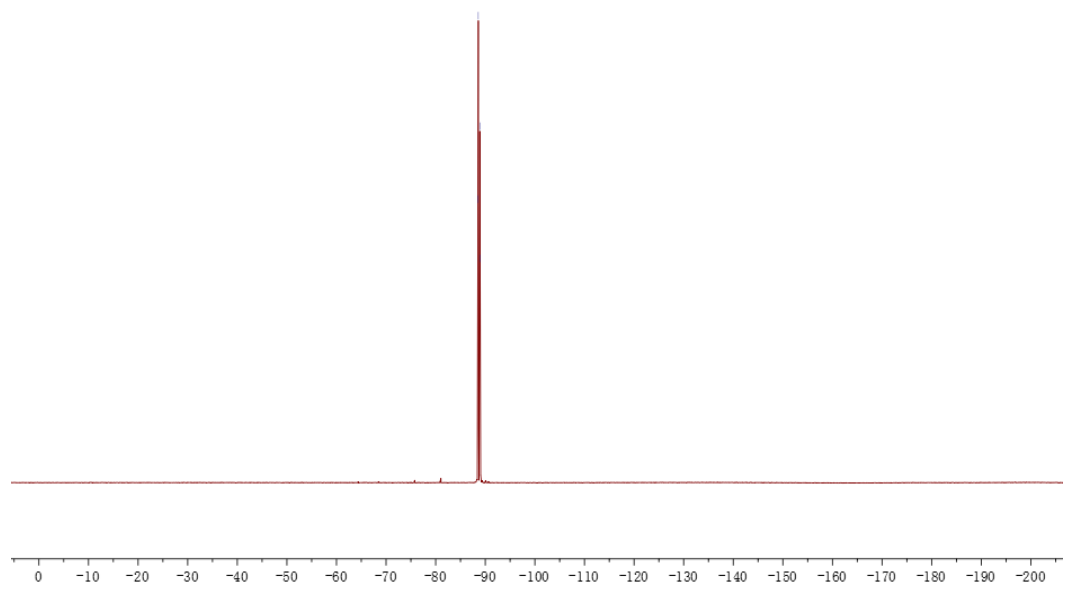

20Z-1.2.1.1r

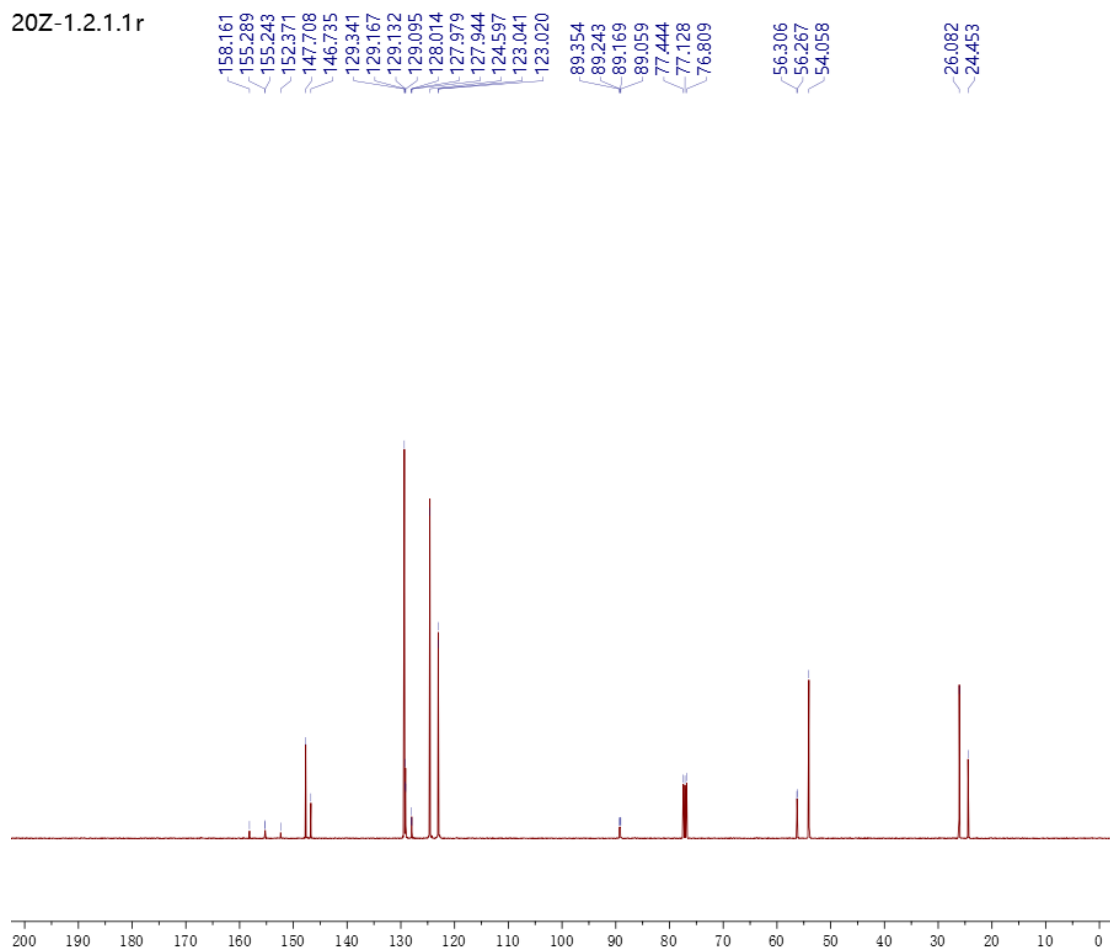

FLN-3-20V-1.1.1.1r

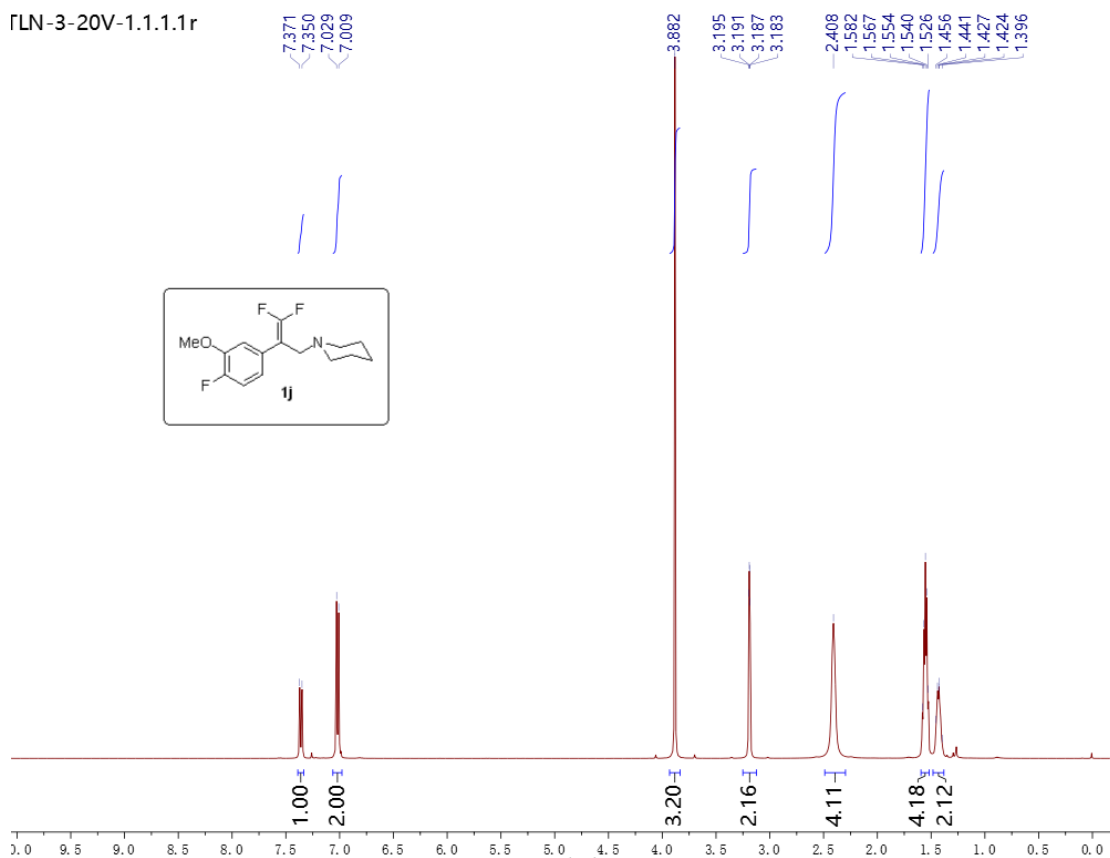

-3-20V-1.7.1.1r

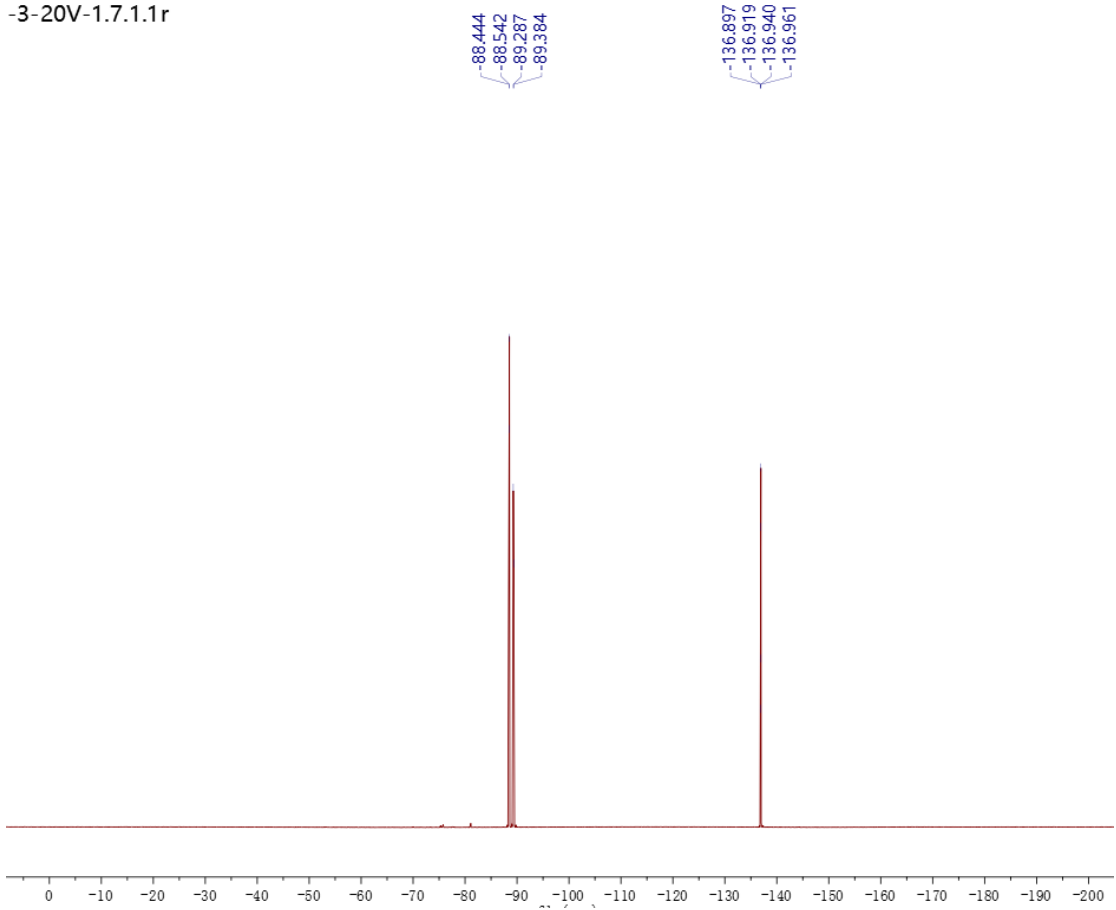

-20V-1.2.1.1r

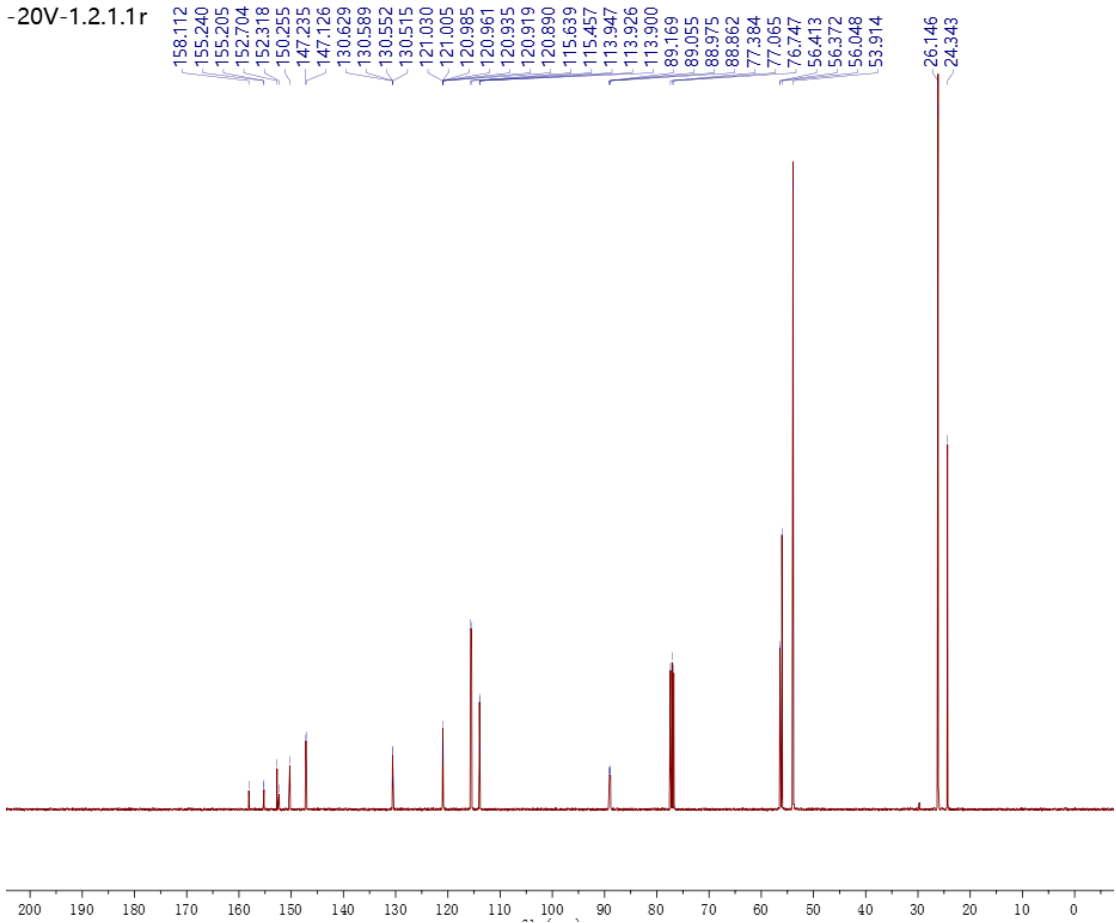



ILN-3-20S.1.1.1r

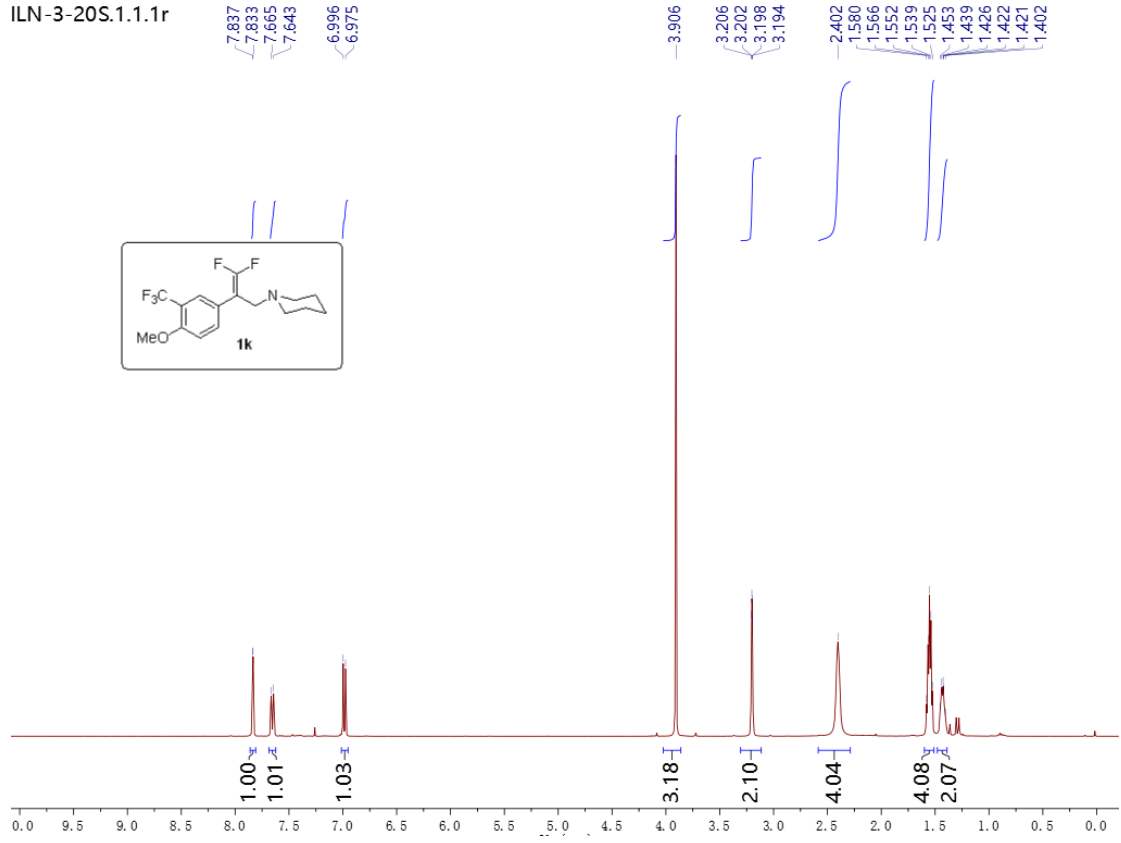

ILN-3-20S.7.1.1r

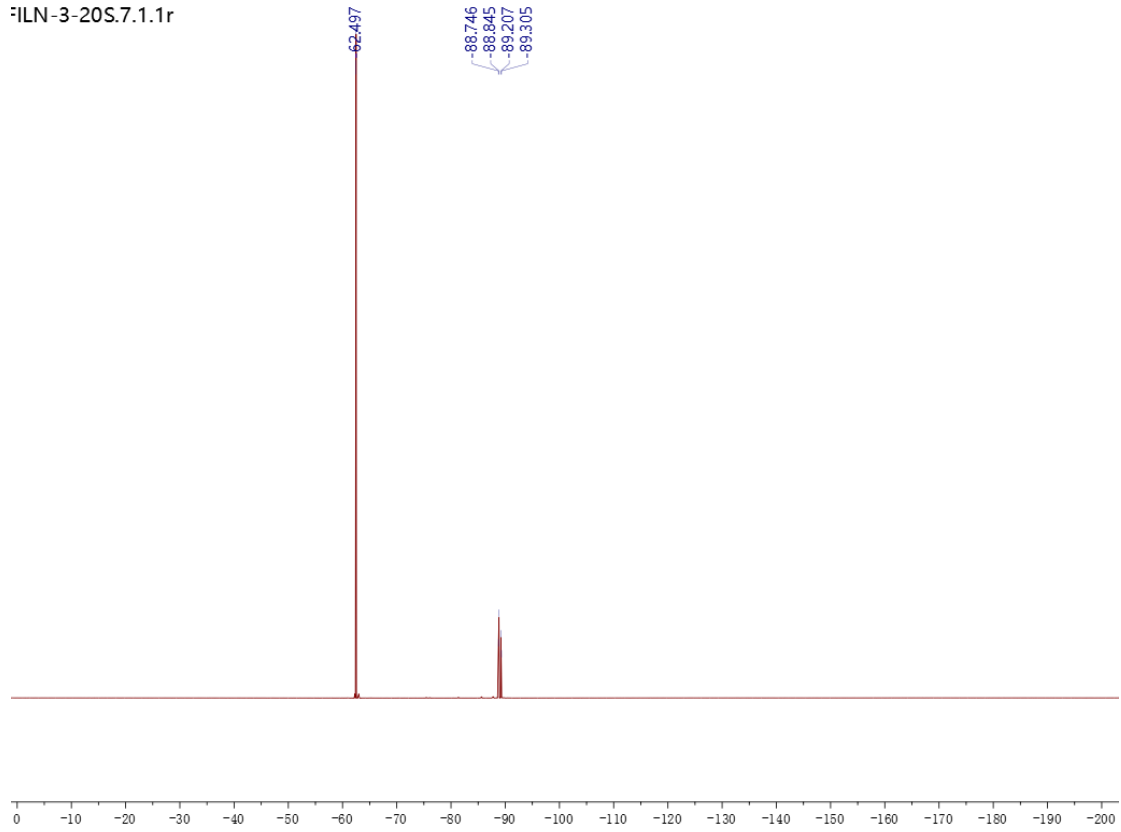

ILN-3-20S.3

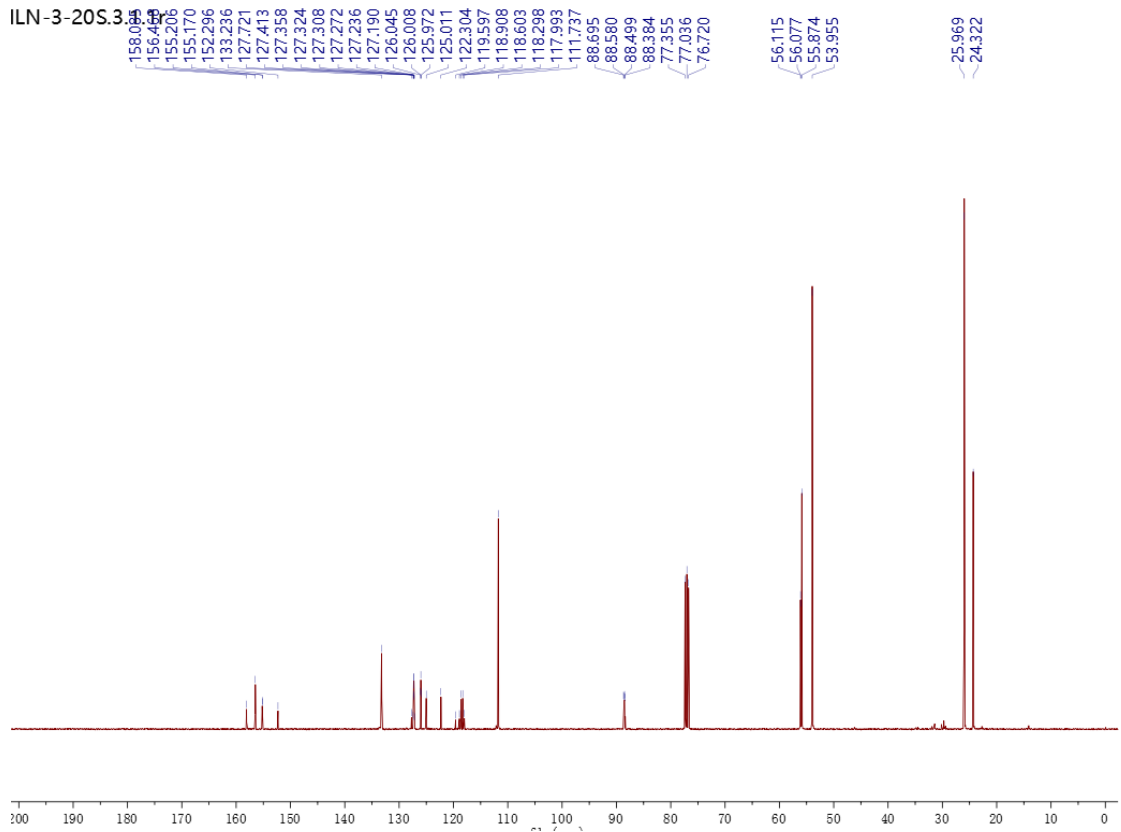

LN-3-20U-1.1.1.1r

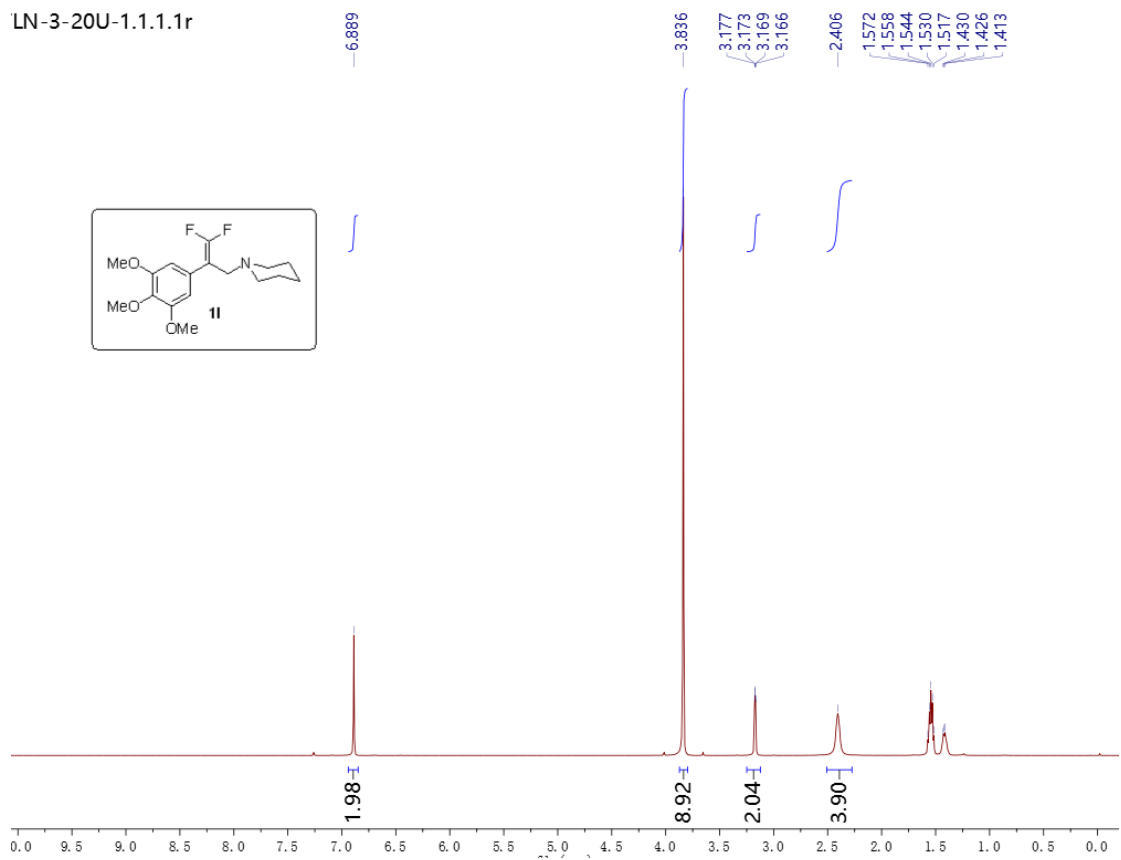

-20U-1.7.1.1r

-88.082  
-88.181  
-89.319  
-89.418

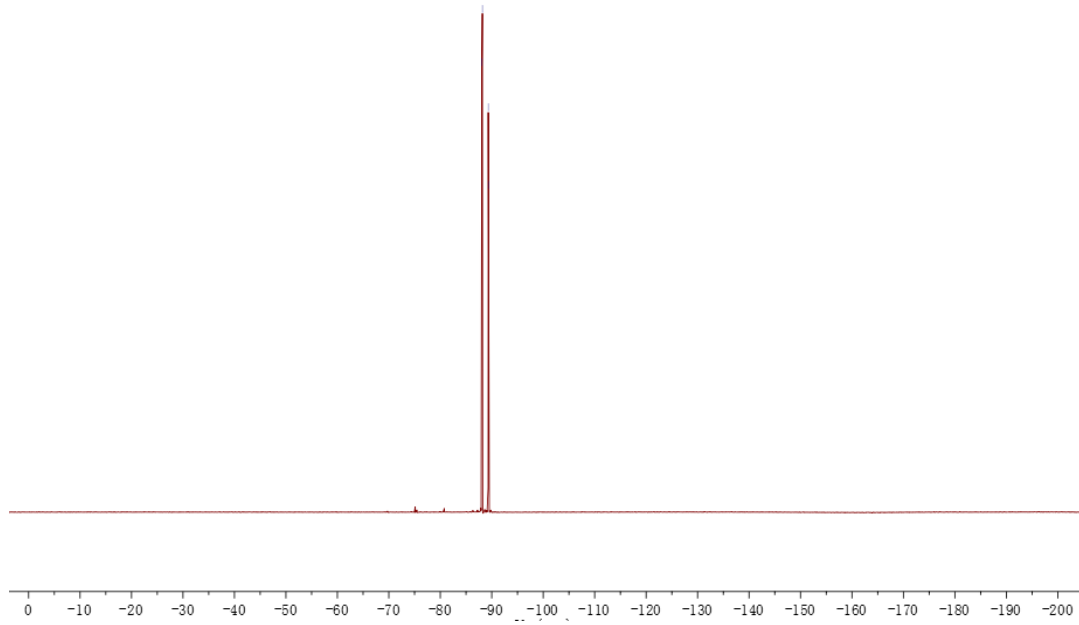

20U-1.2.1.1r

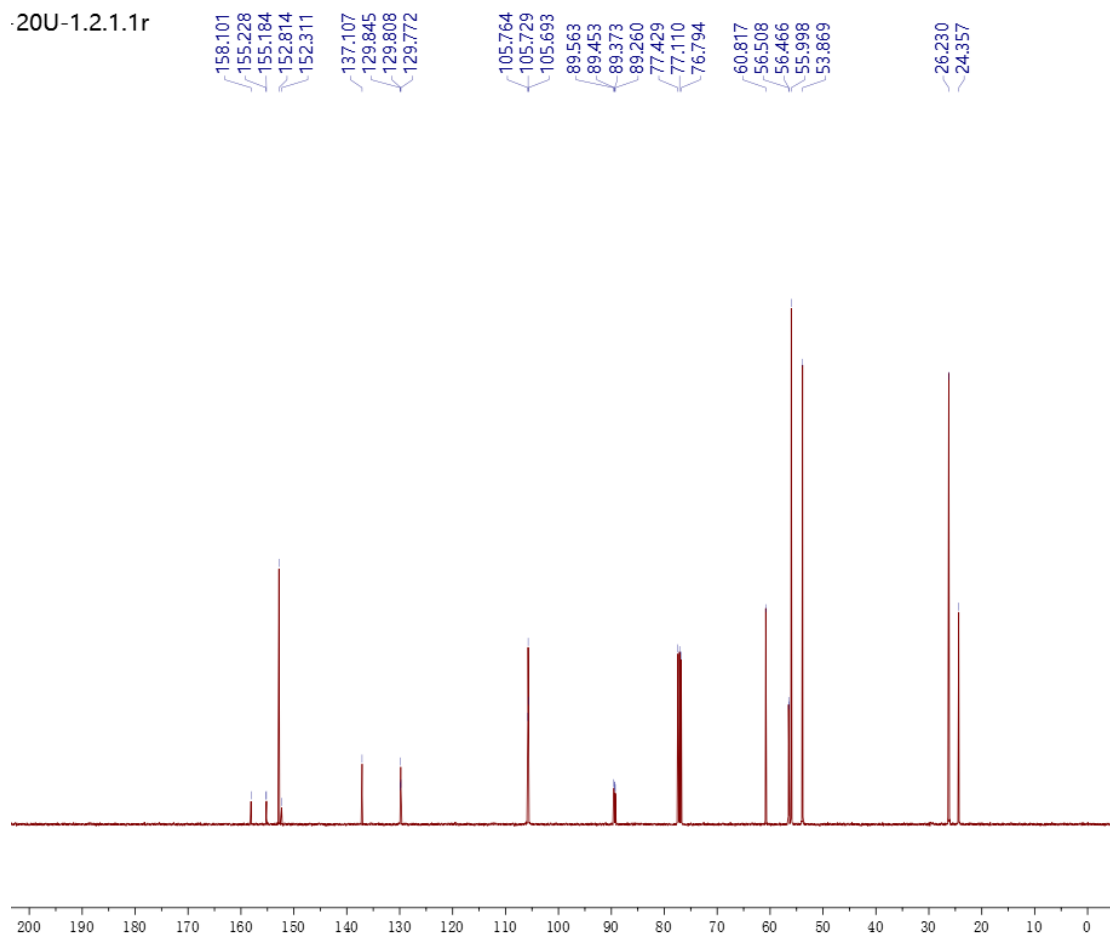

LN-3-20T-1-0714.1.1

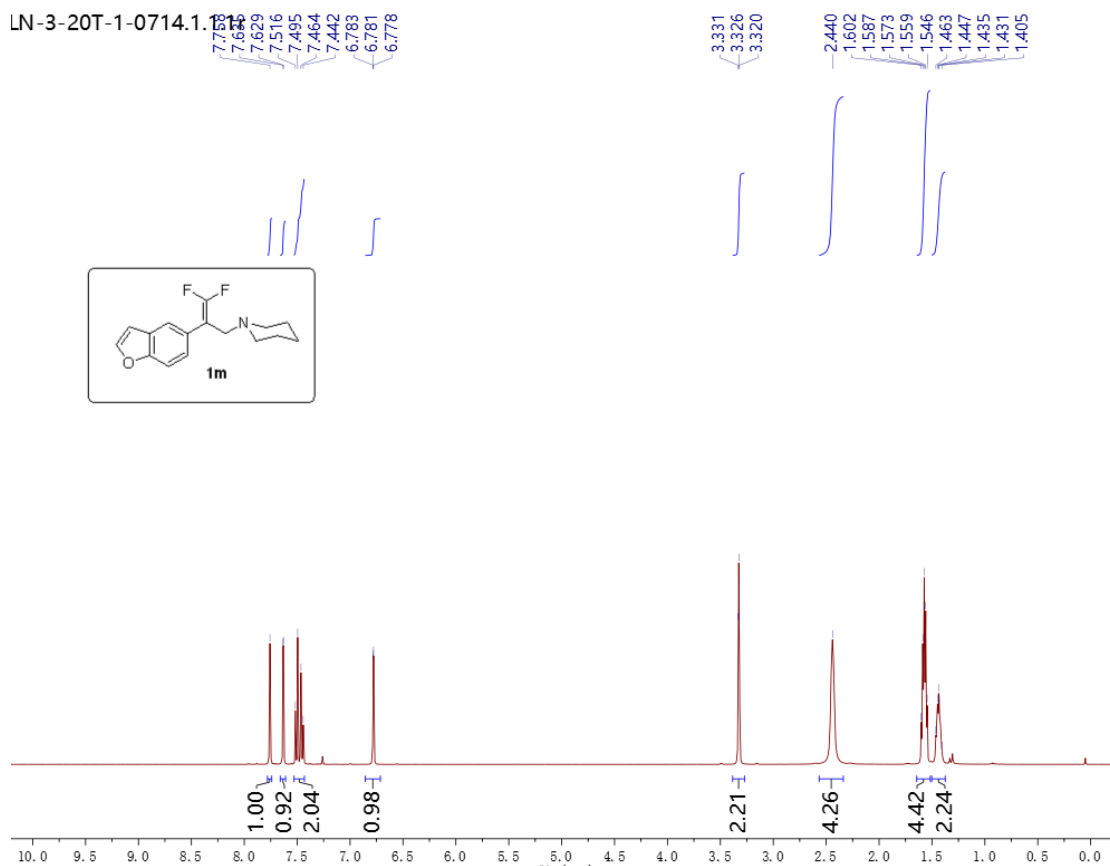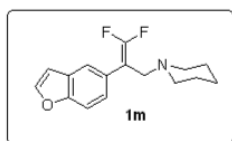

-20T-1-0714.7.1.1r

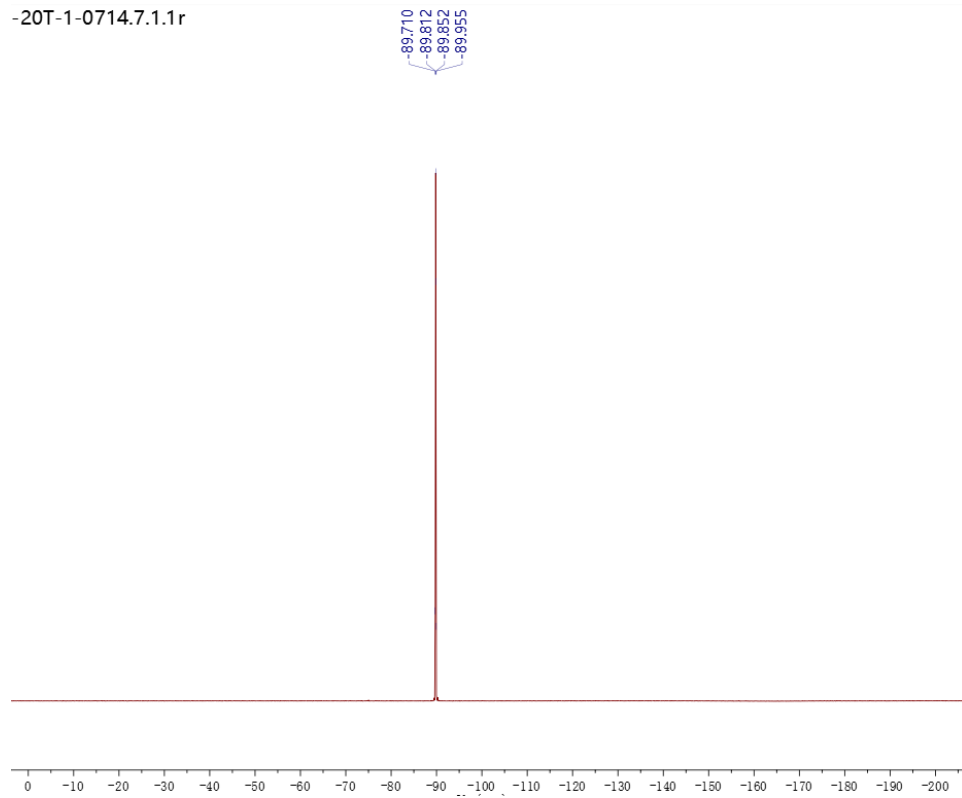

3-20T-1.2.1.1r

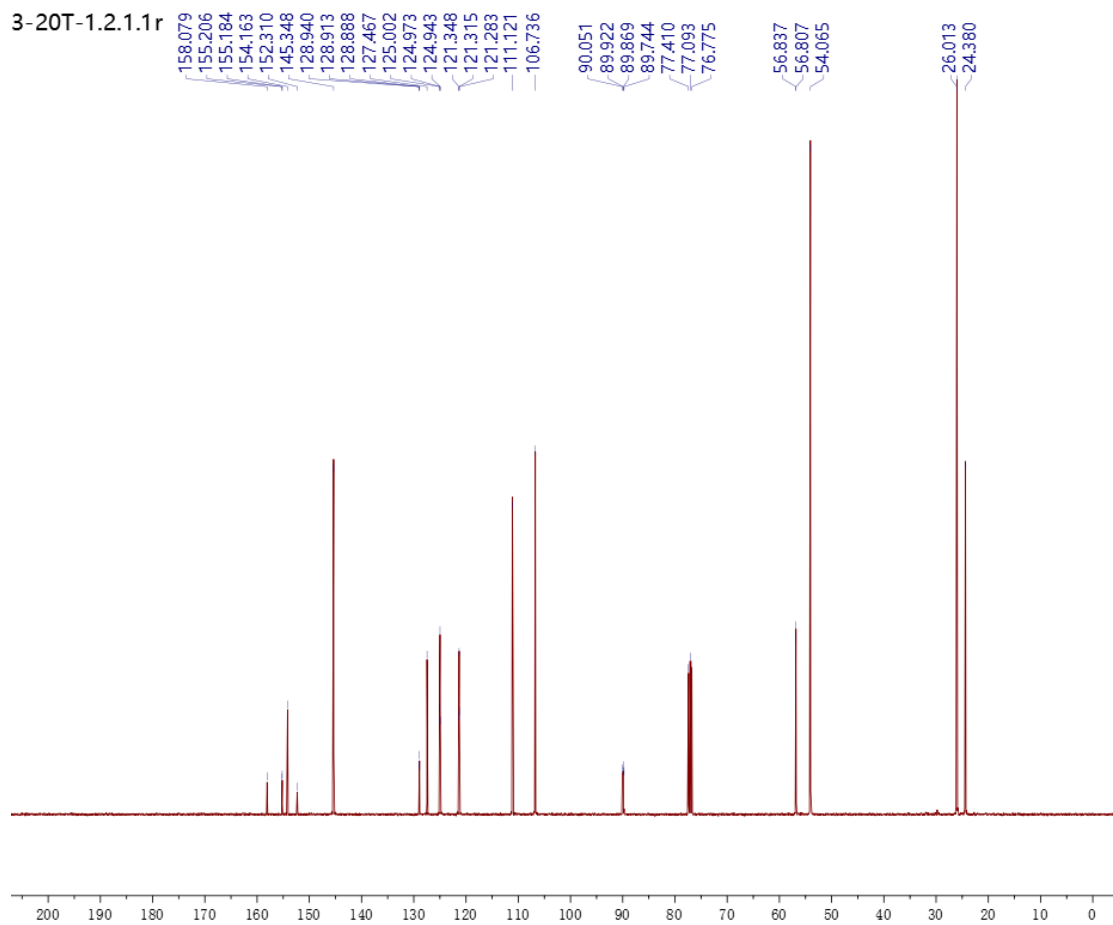

TLN-3-20C-1.1.1.1r

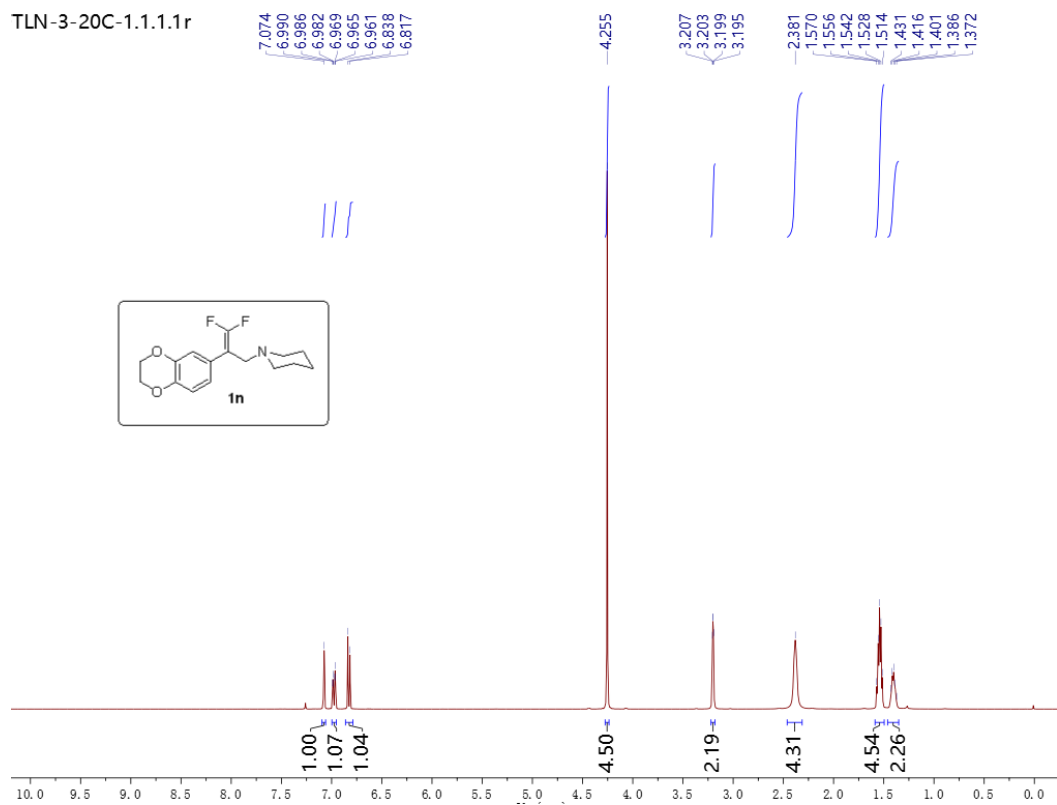

3-20C-1.7.1.1r

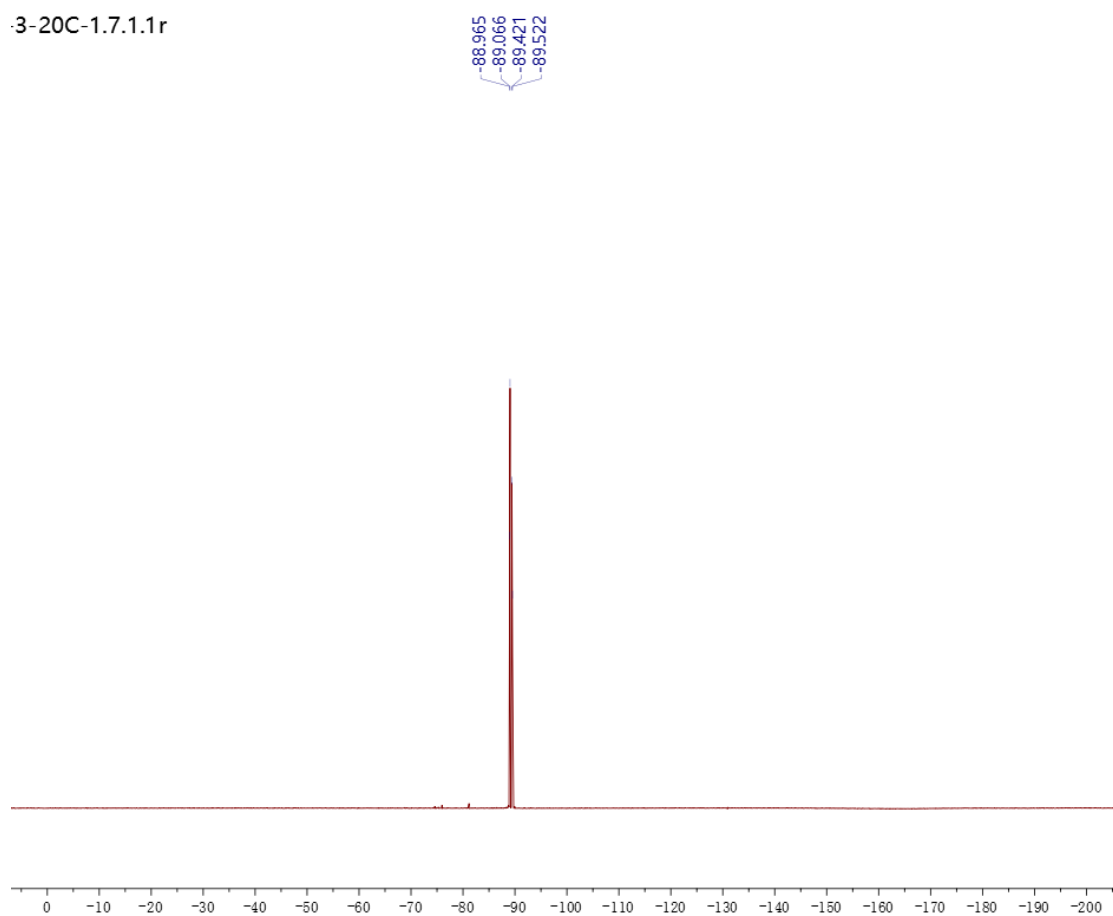

V-3-20C-1.2.1.1r

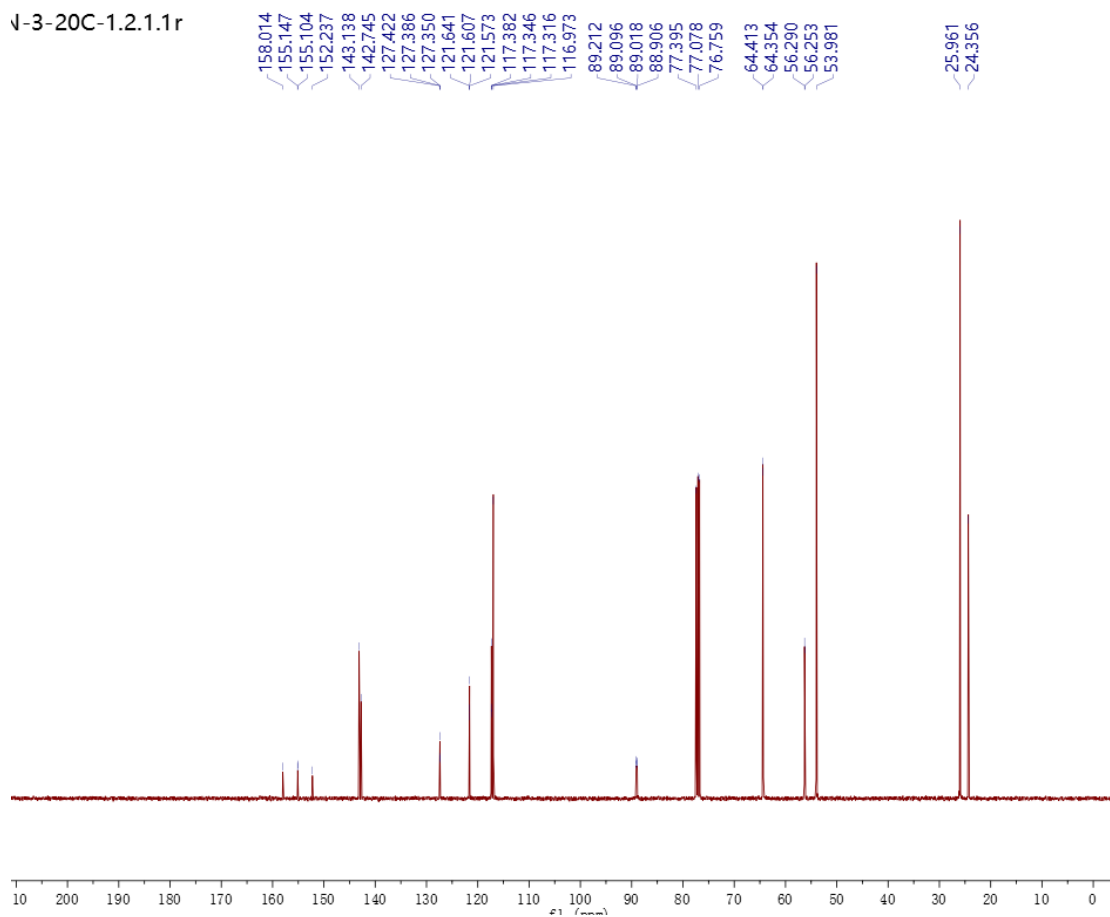

LN-s-3a-1129.1.1.1r

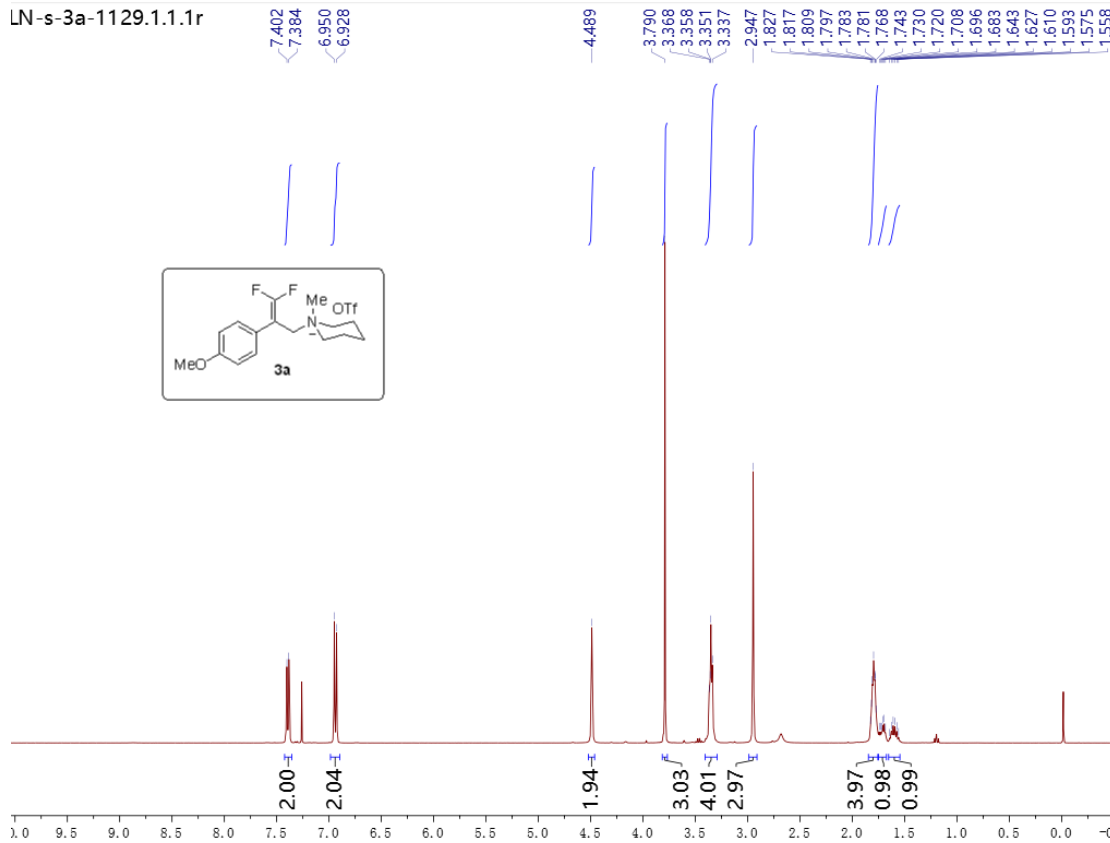

v-s-3a-1129.7.1.1r

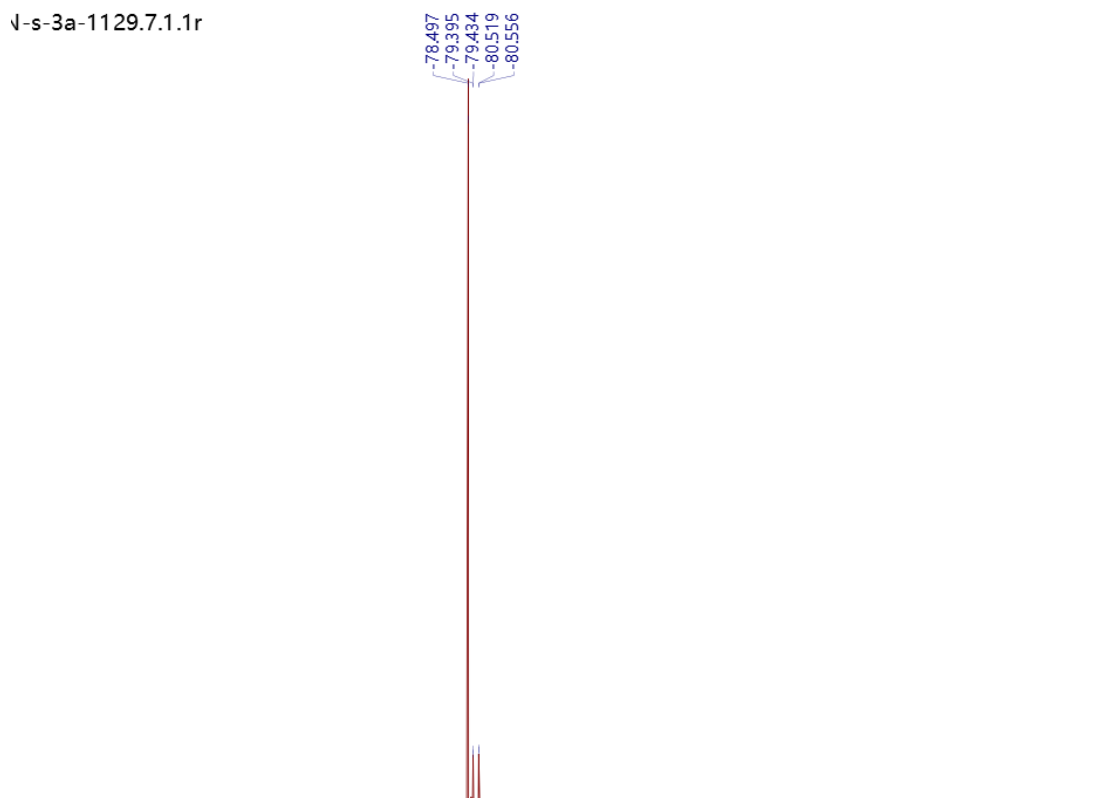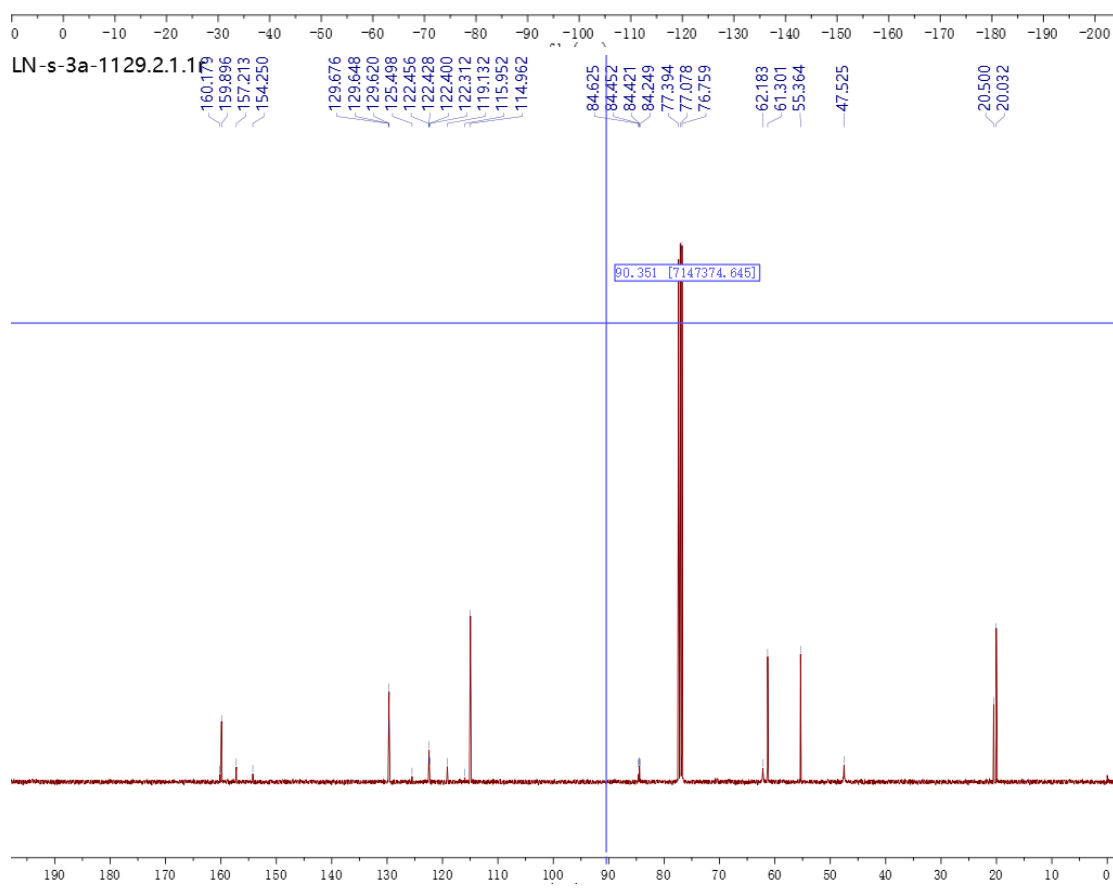



LN-3-26A-1129.1.1.1r

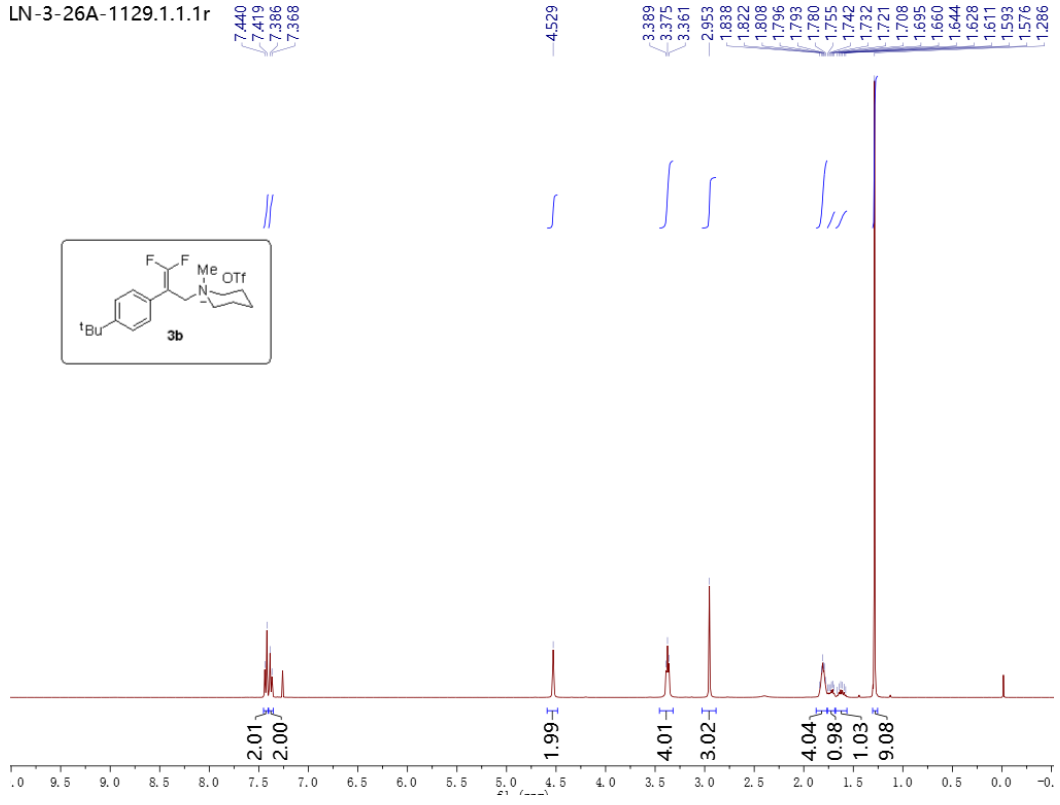

-3-26A-1129.7.1.1r

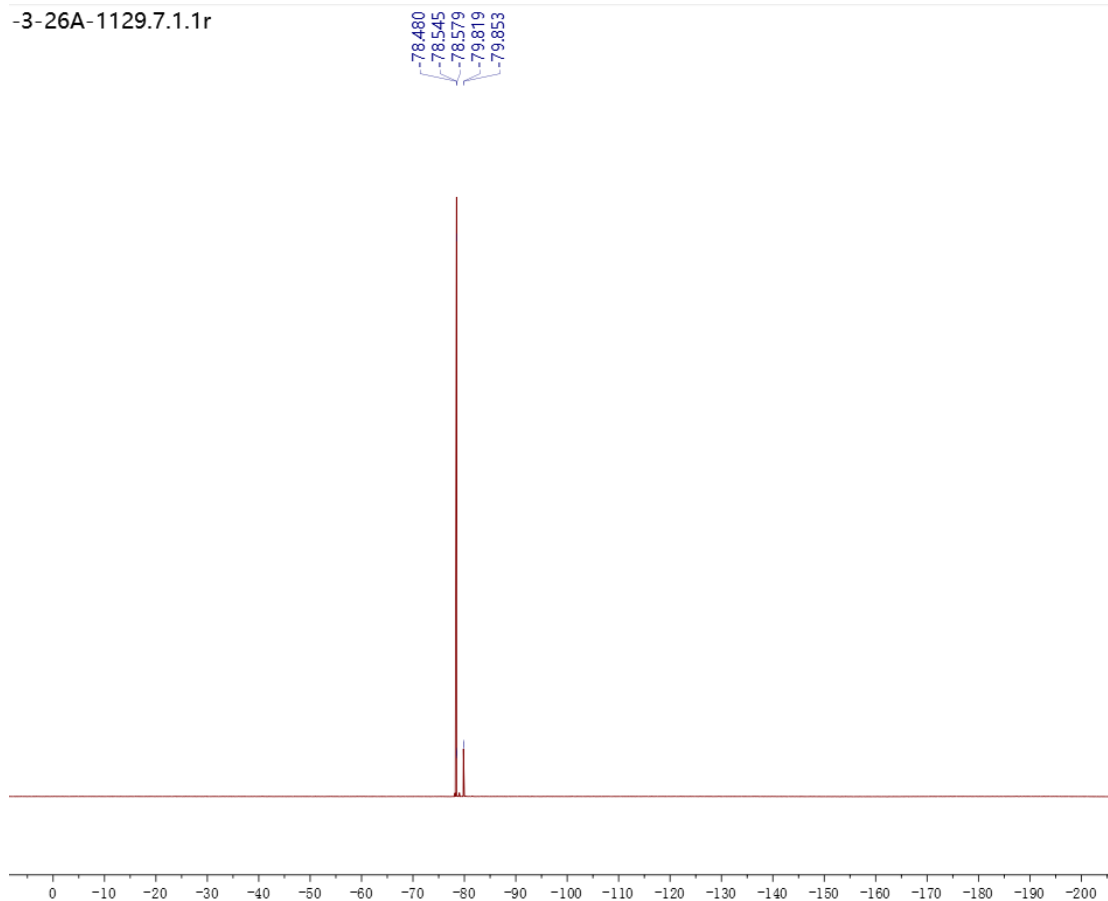

-26A-1129.10.1.1r

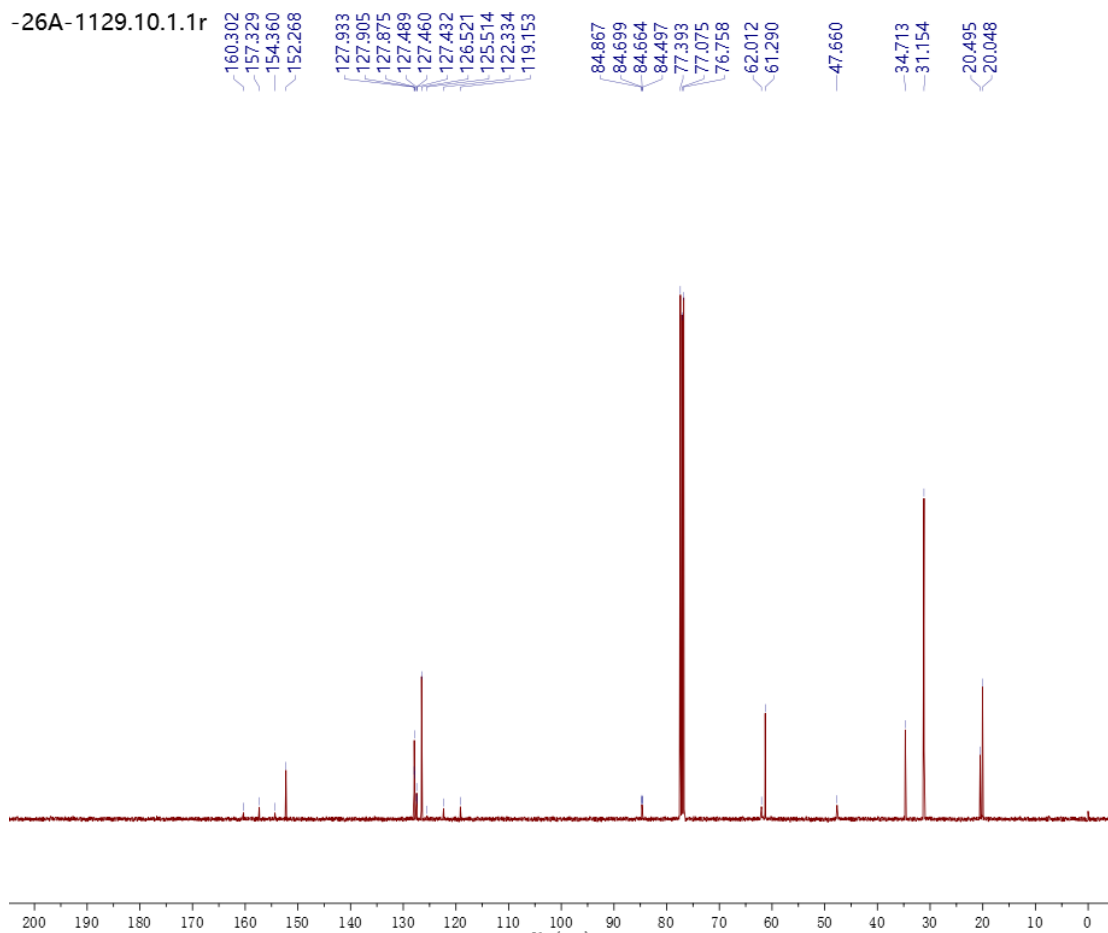

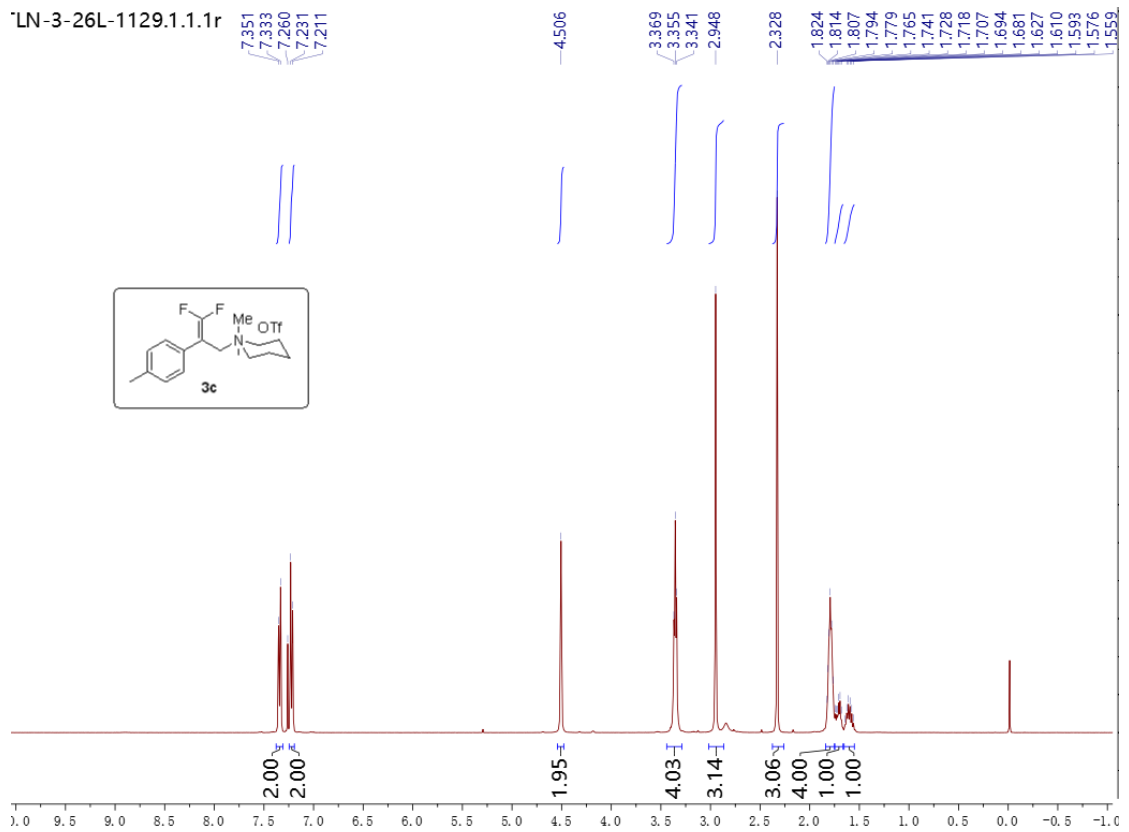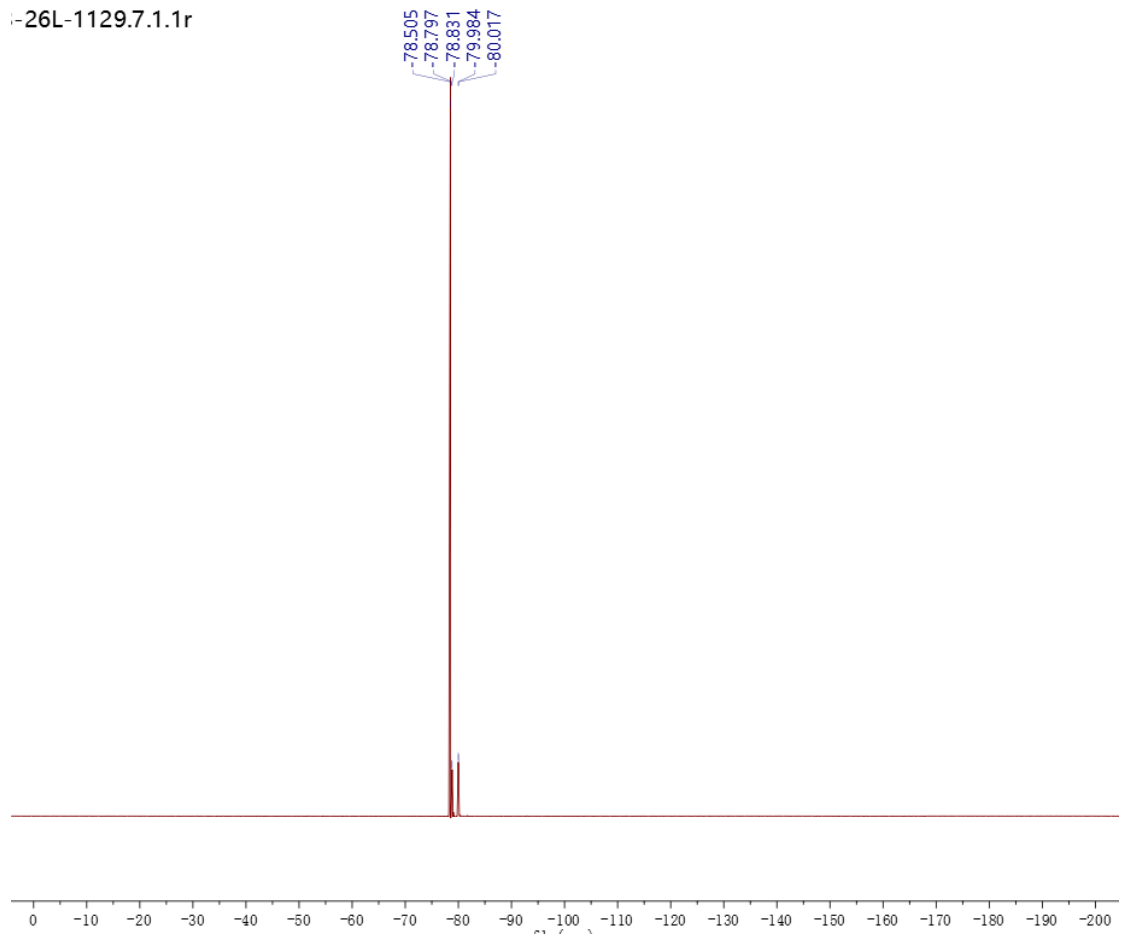

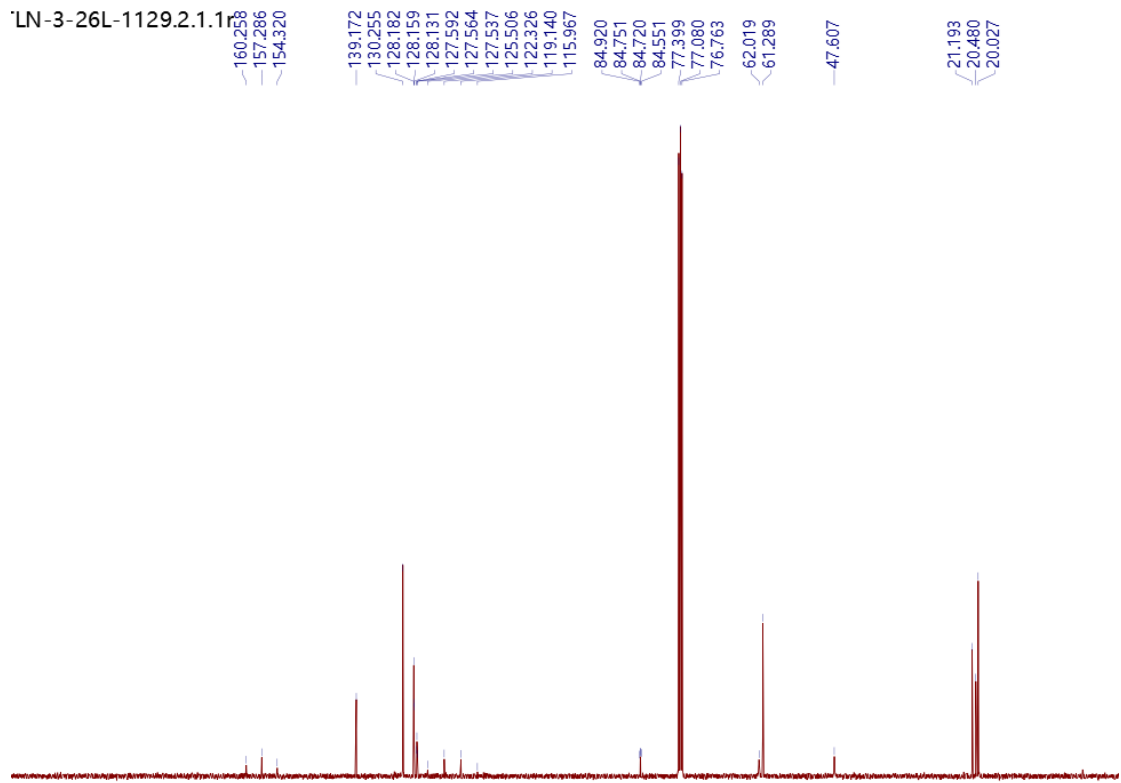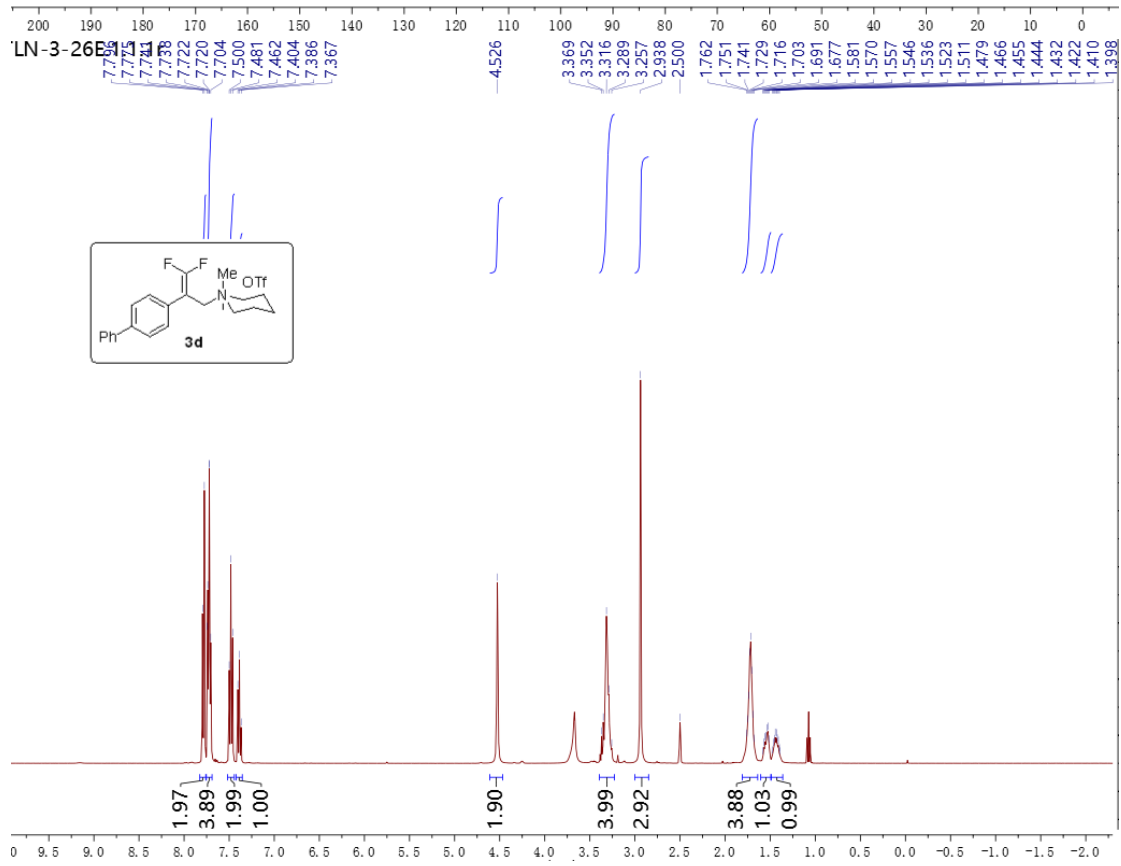

-3-26E.7.1.1r

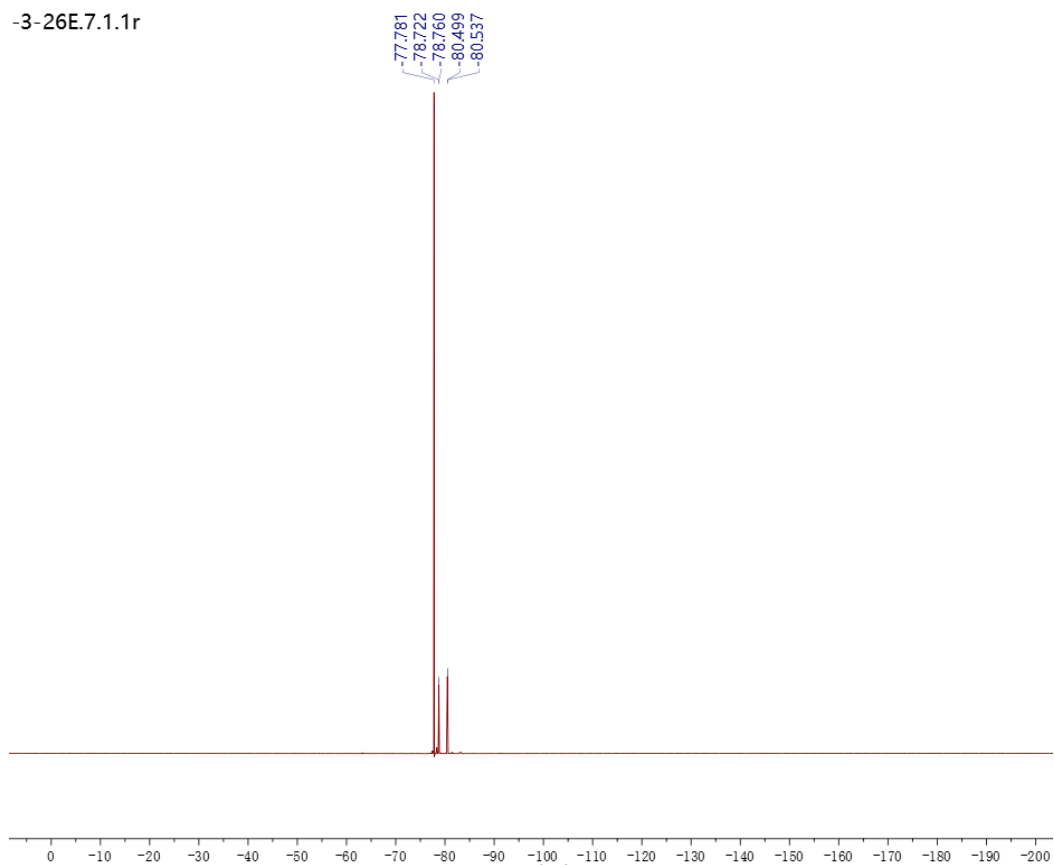

26E.2.1.1r

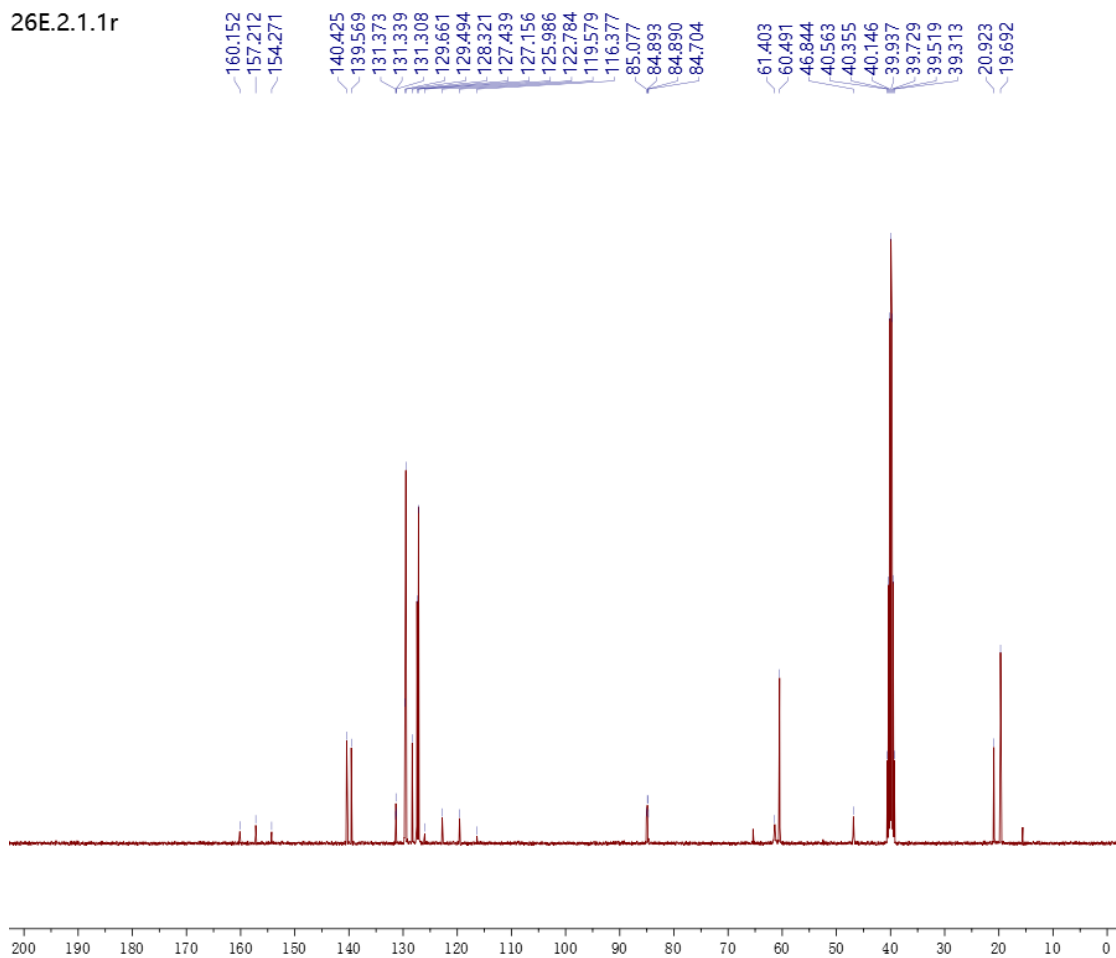

V-3-26F-1129.1.1.1r

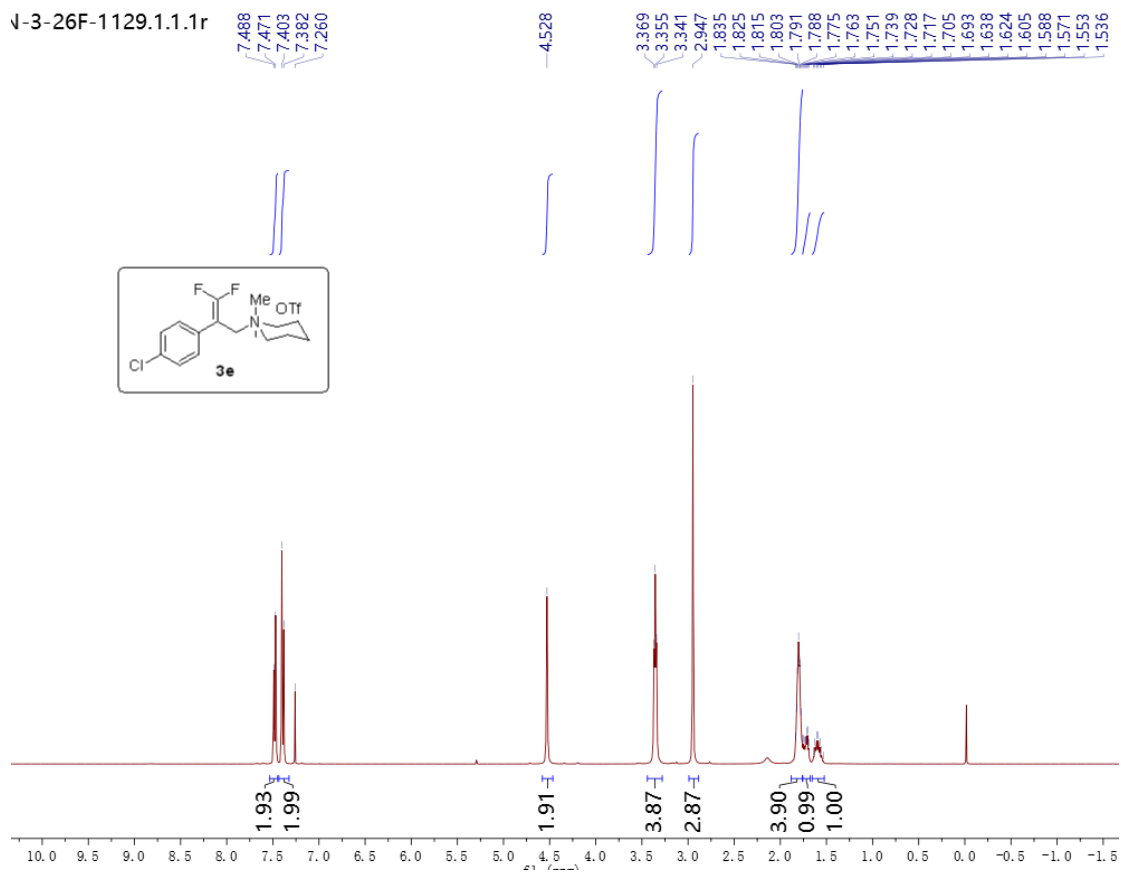

LN-3-26F-1129.7.1.1r

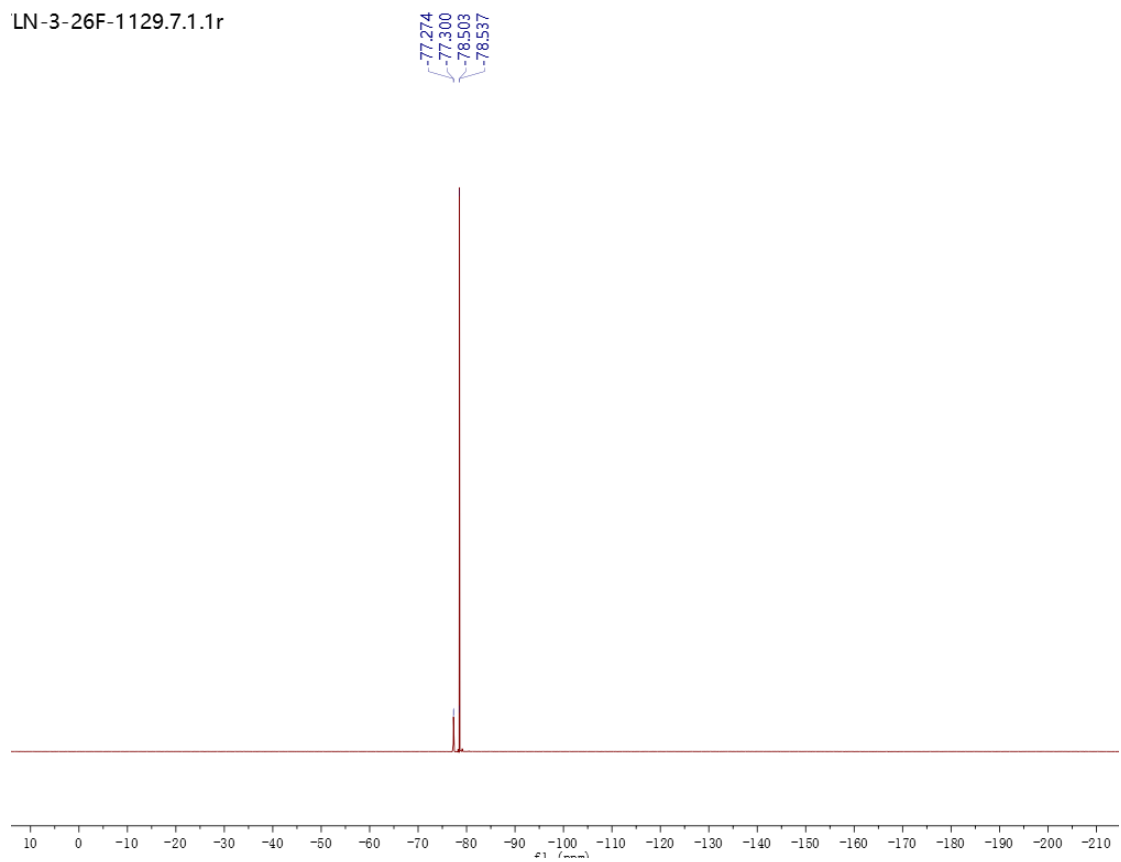

-26F-1129.2.1.1r

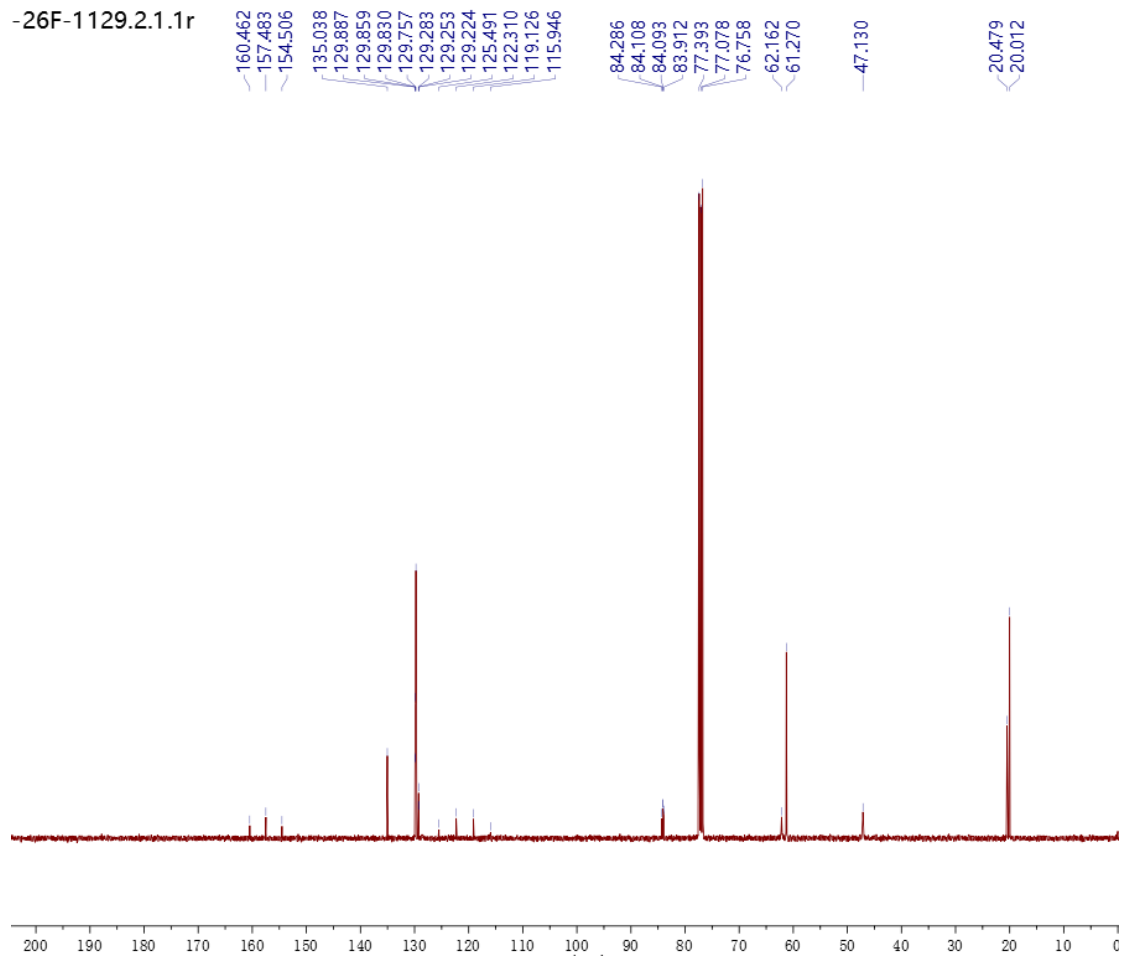

LN-3-26K-1129.1.1

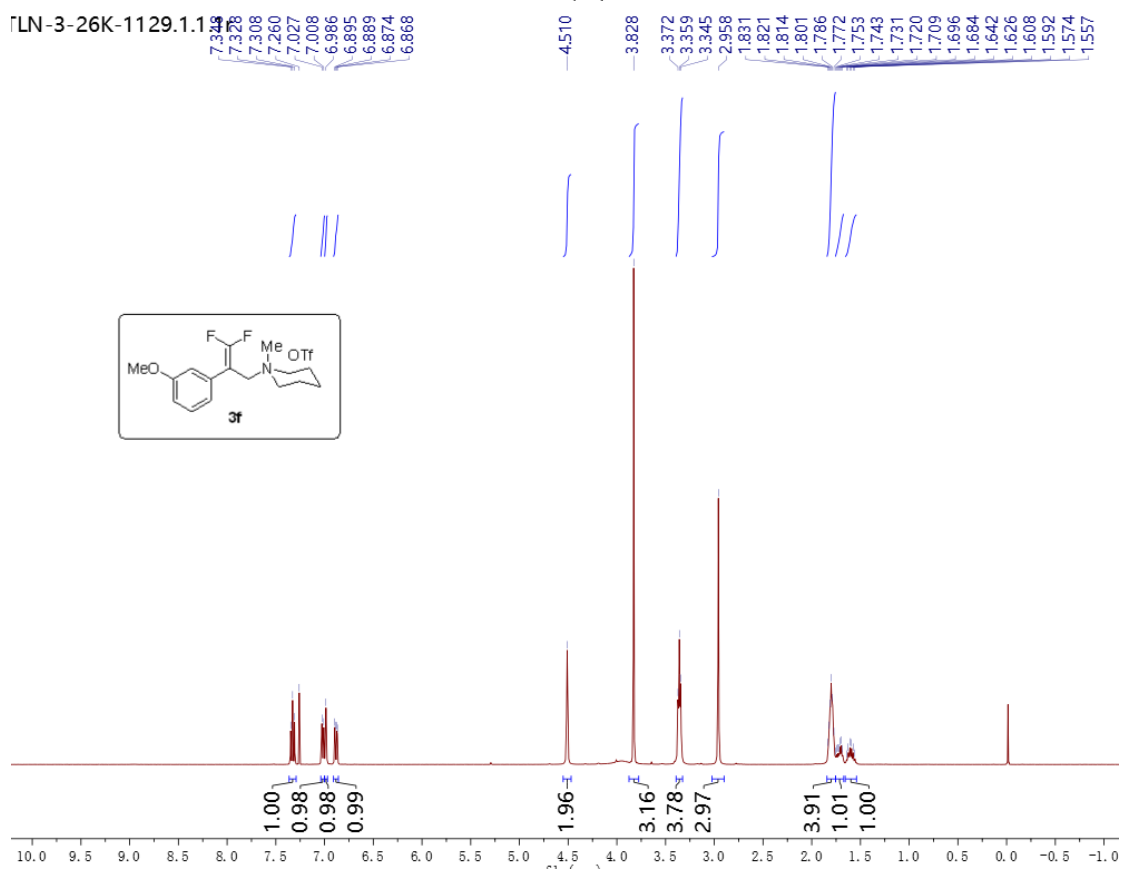

V-3-26K-1129.7.1.1r

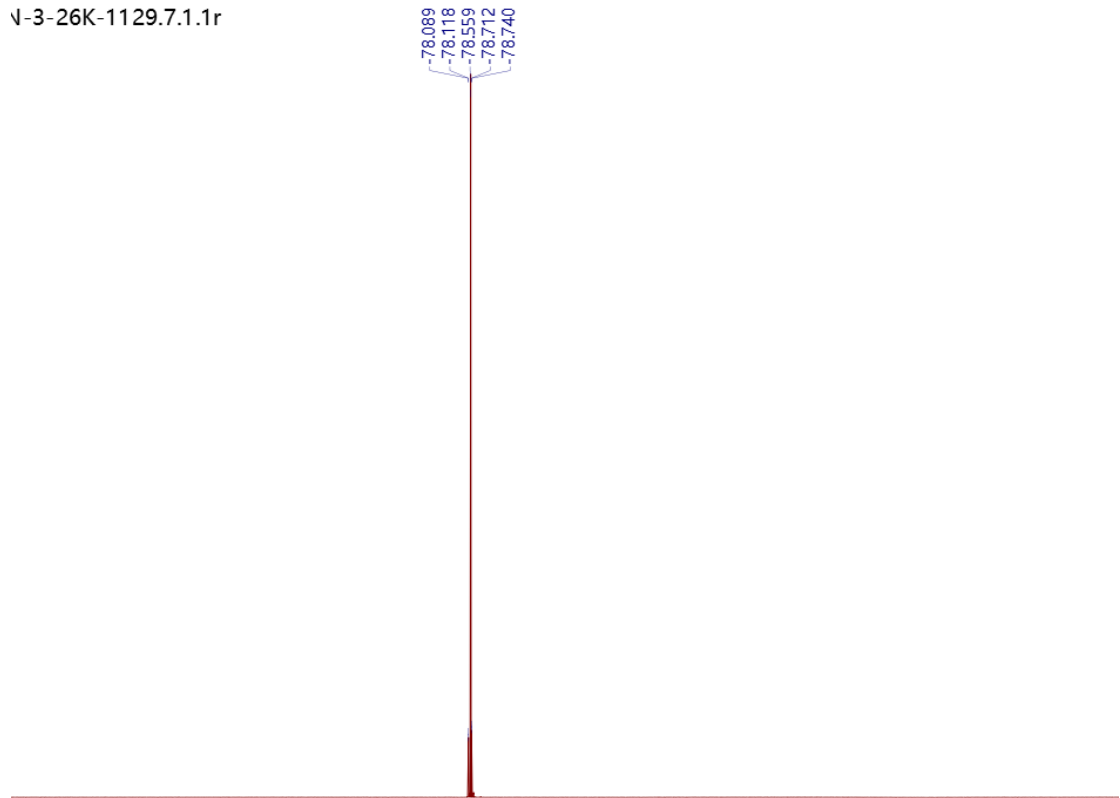

3-26K-1129.2.1.1r

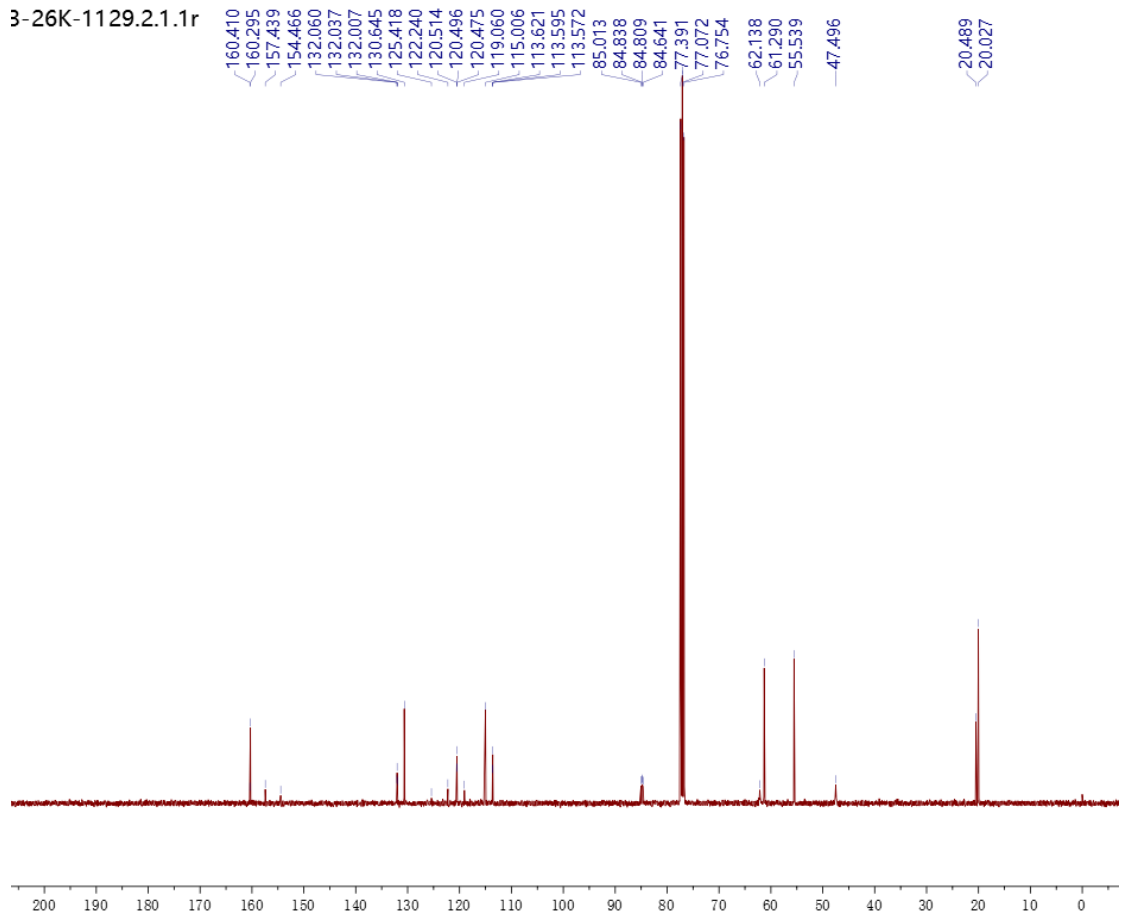



LN-3-26I-1129

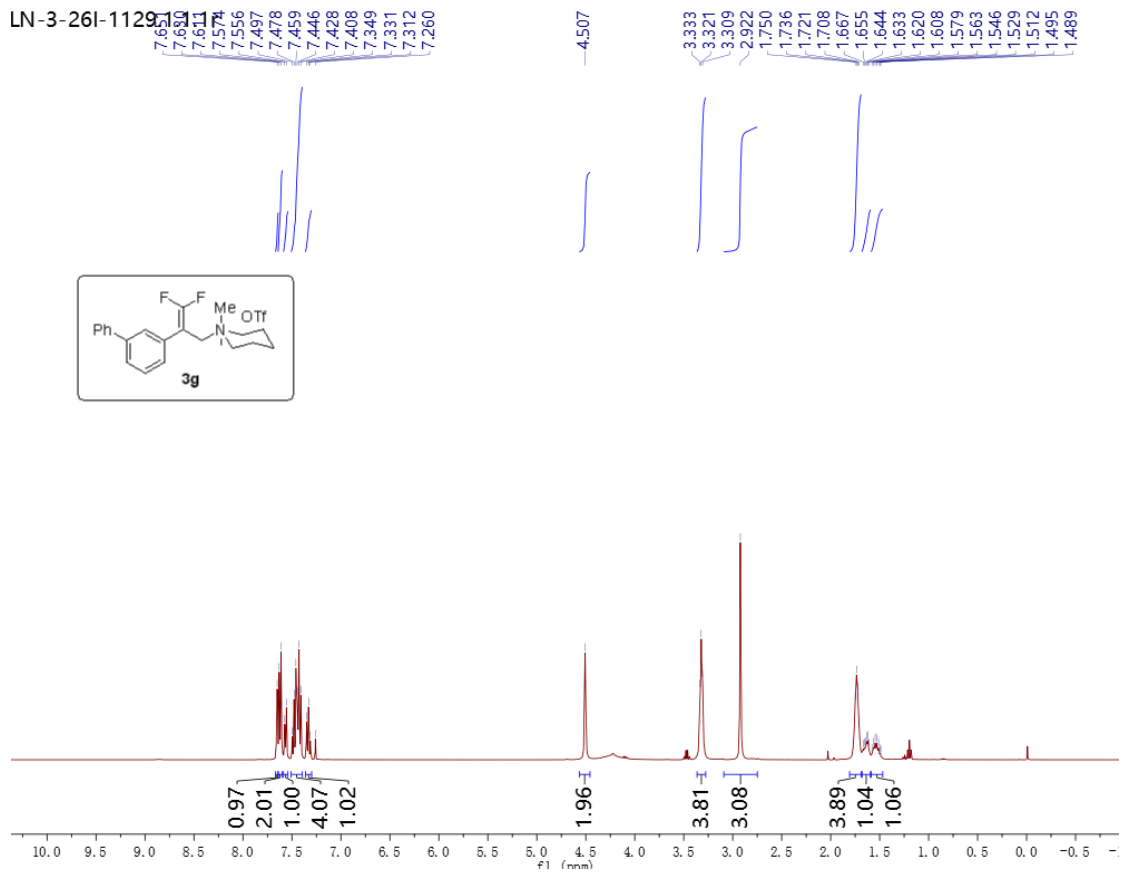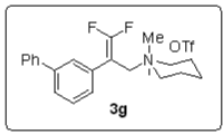

3-26I-1129.7.1.1r

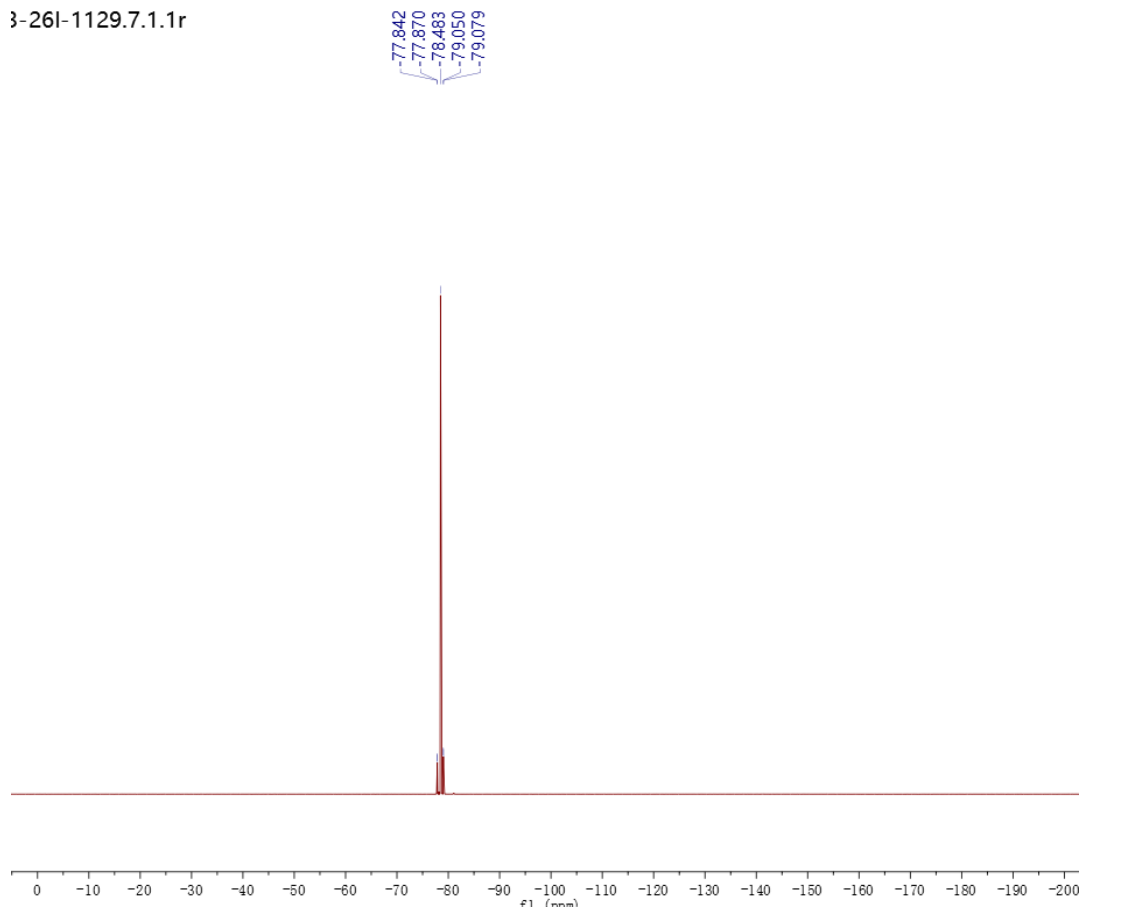

3-26I-1129.2.1.1r

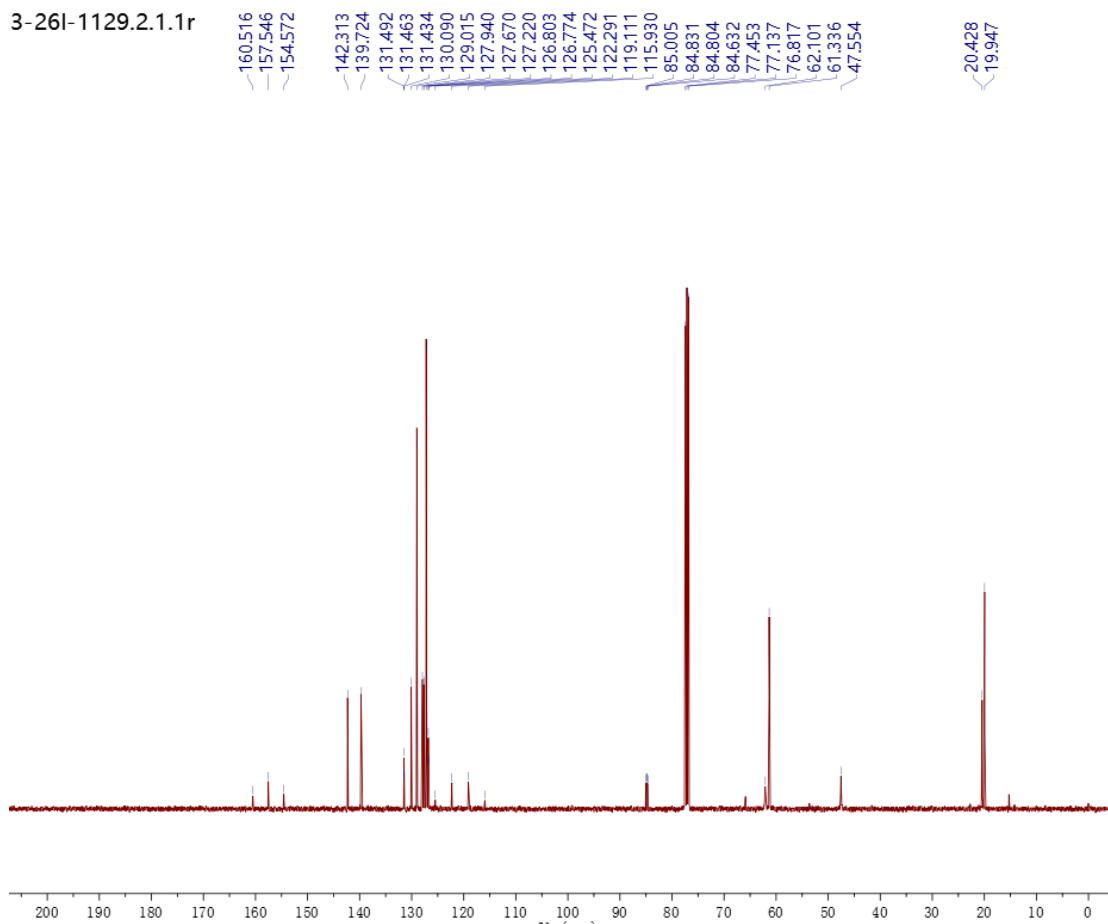

LN-3-26R-1129.1.1r

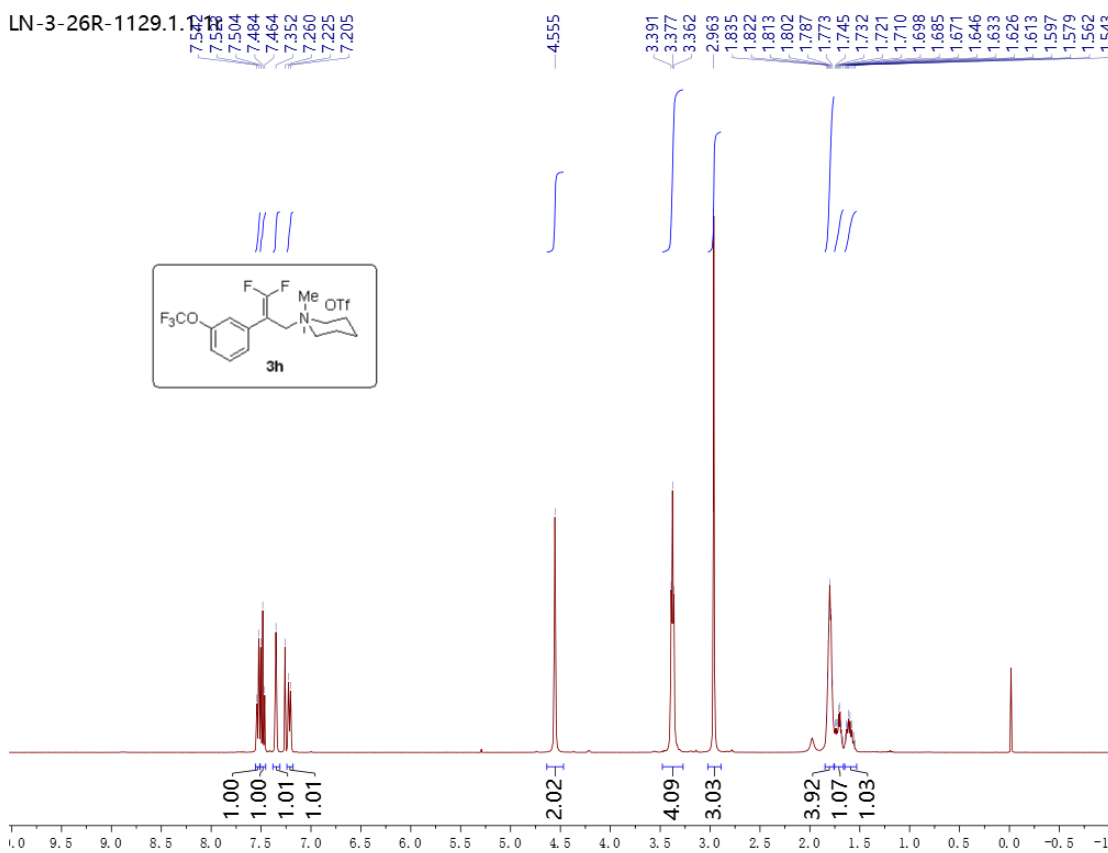

-3-26R-1129.7.1.1r

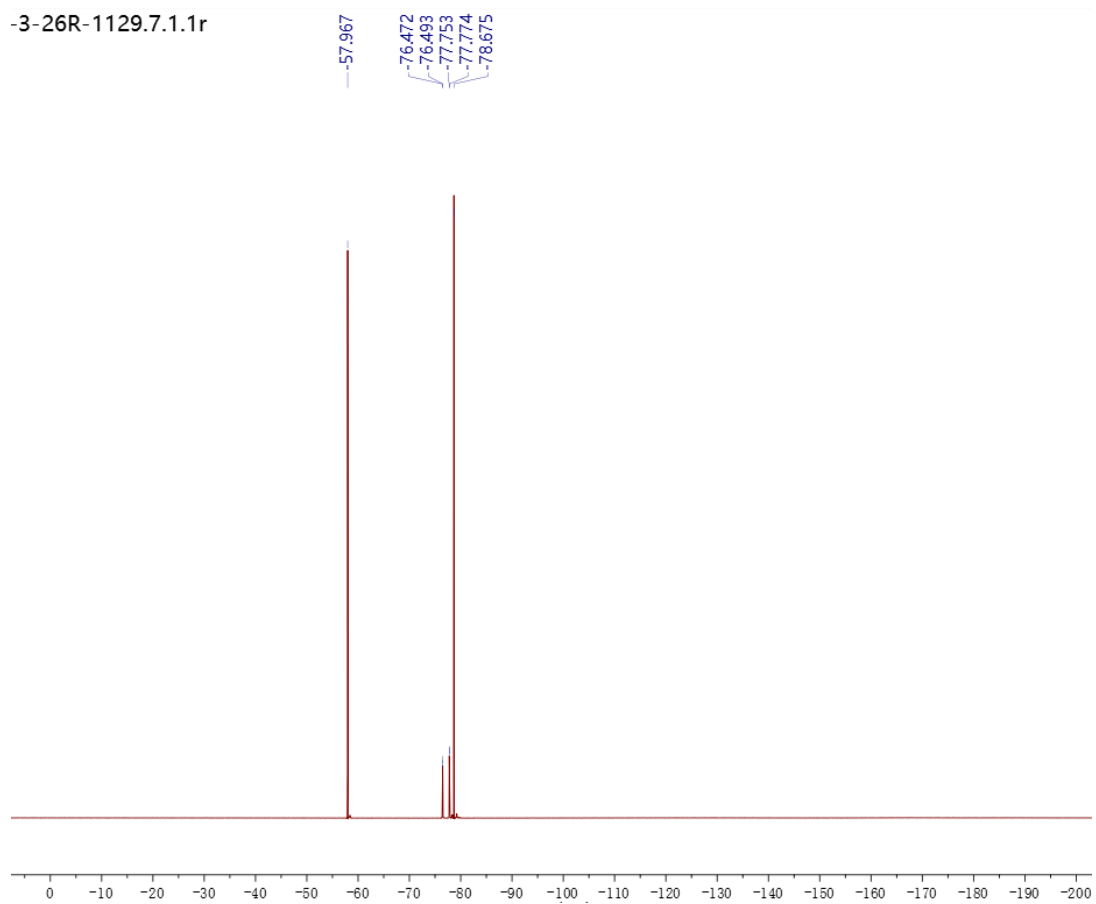

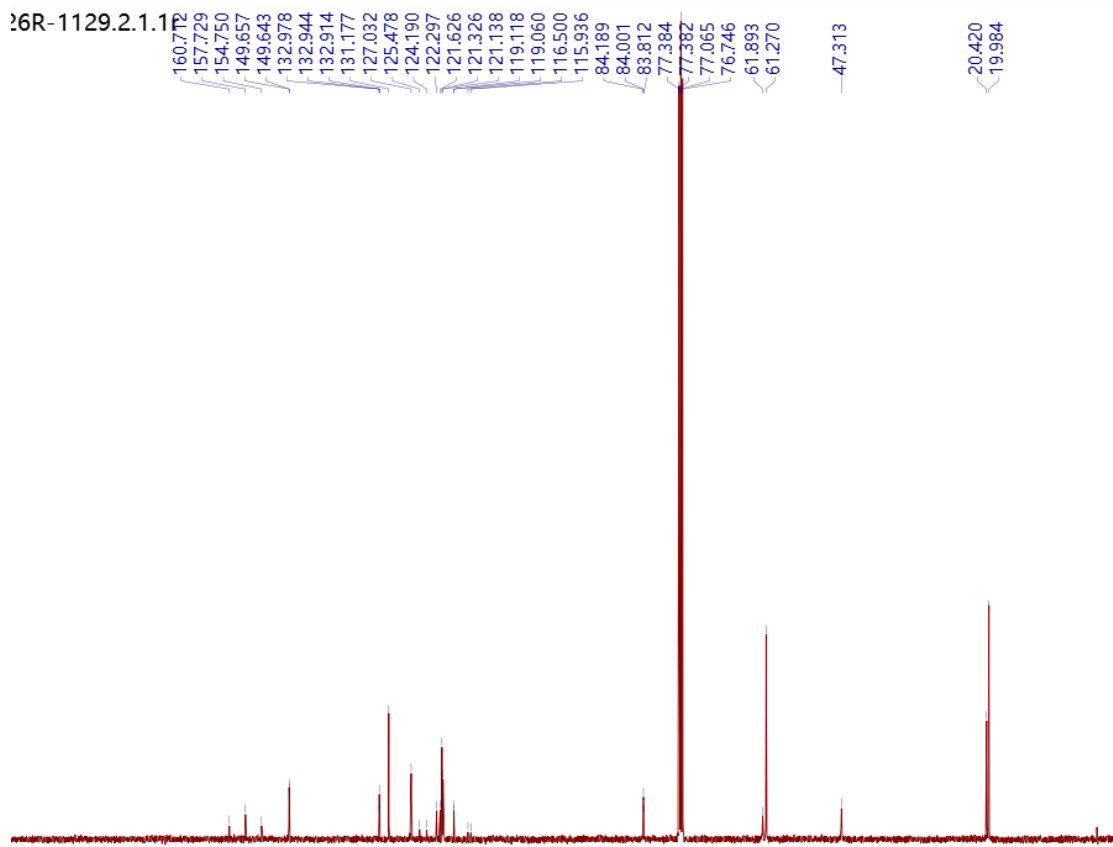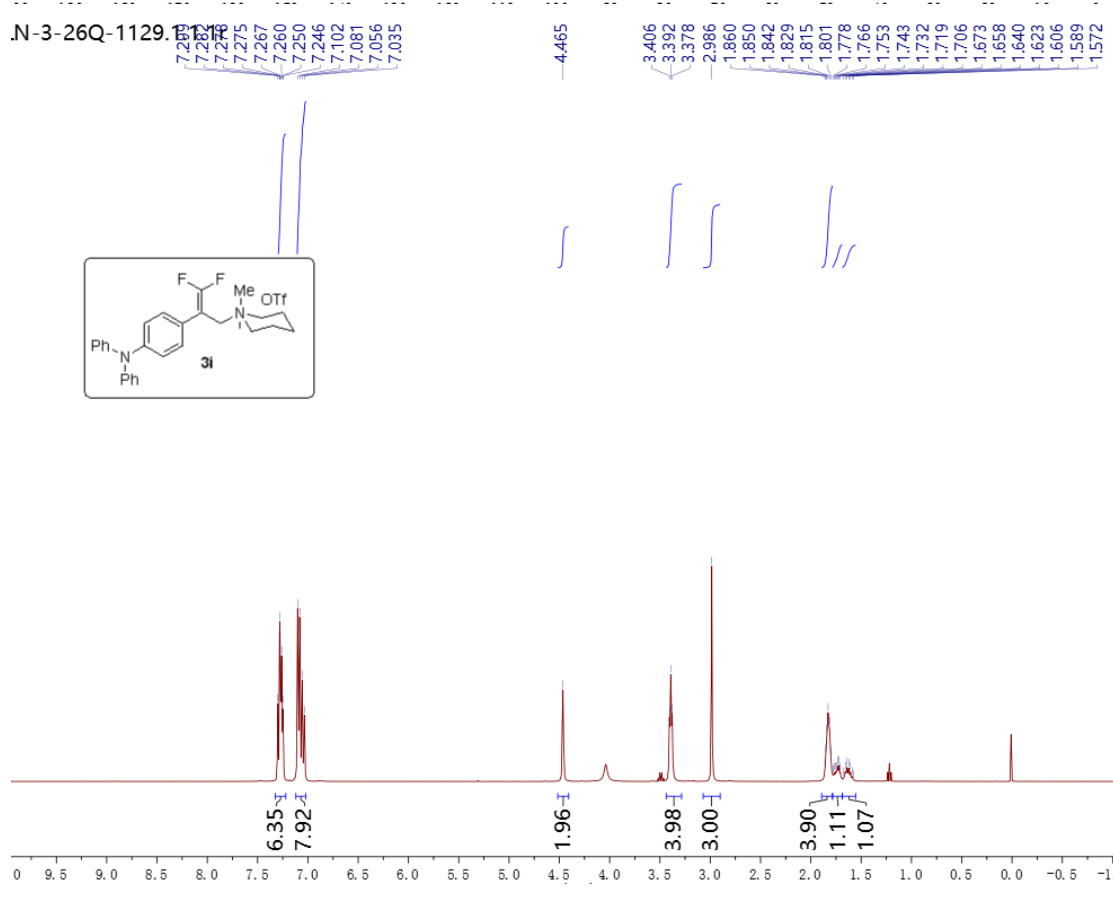

-3-26Q-1129.7.1.1r

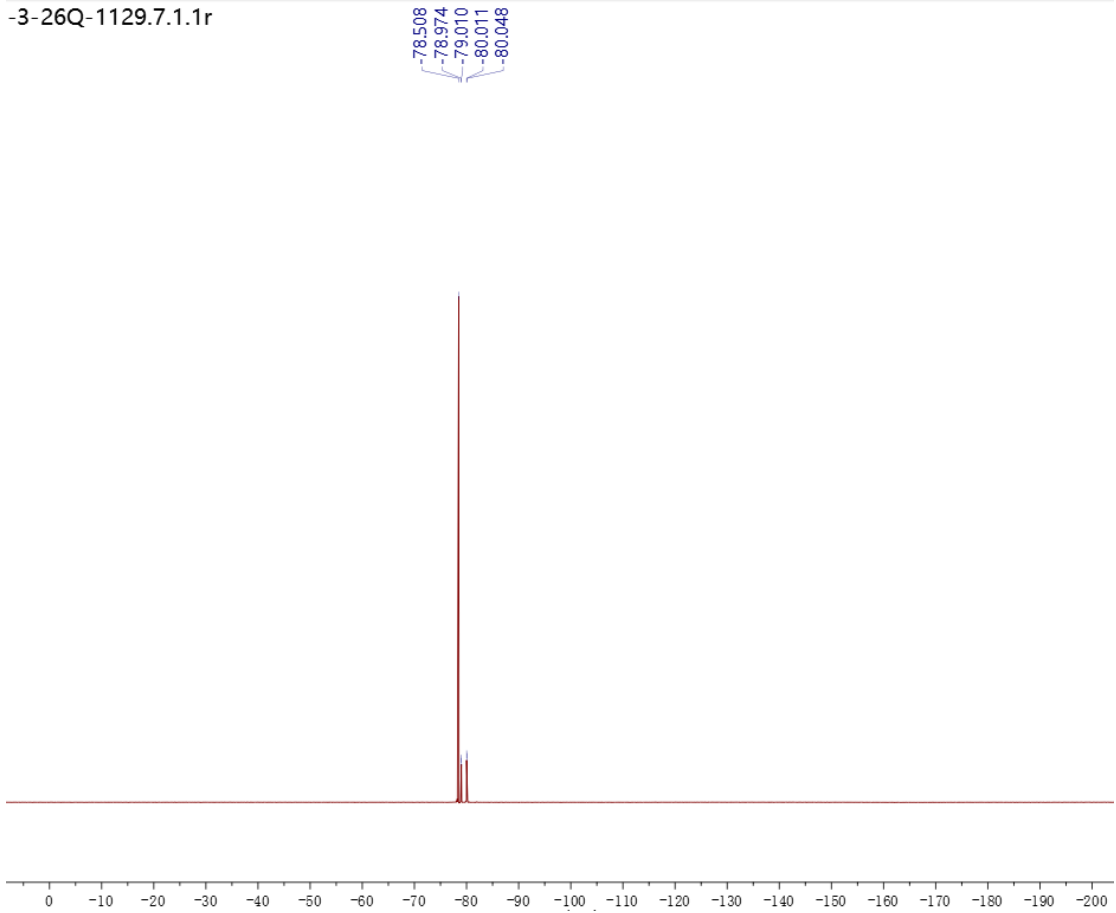

3-26Q-1129.2.1.1r

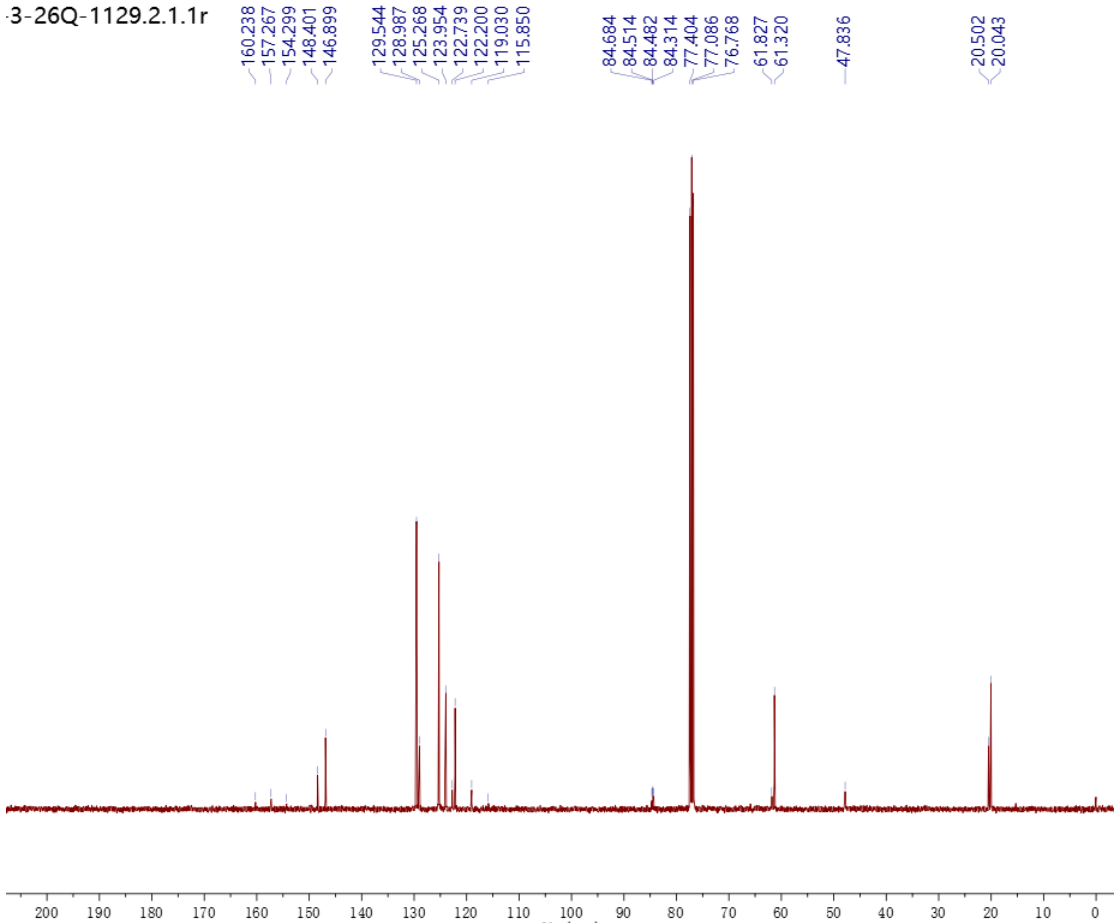

TLN-3-26P-1129.1

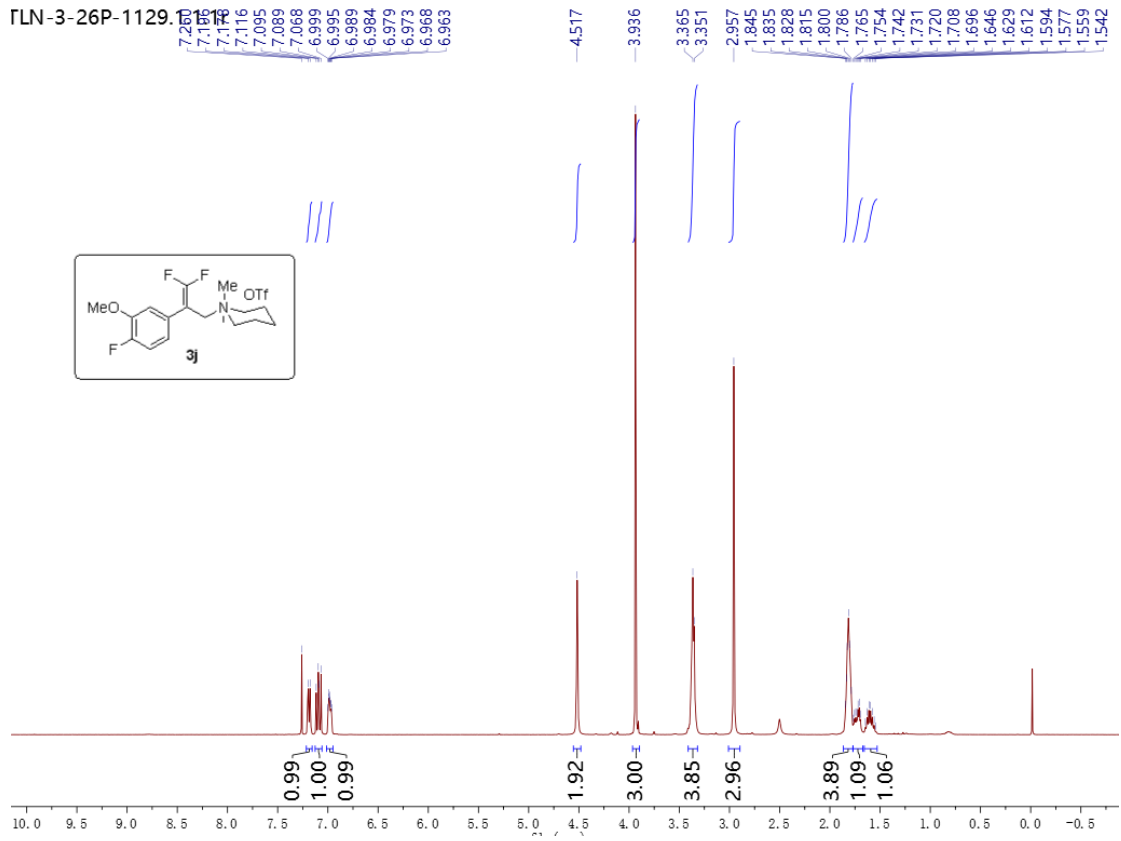

3-26P-1129.7.1.1r

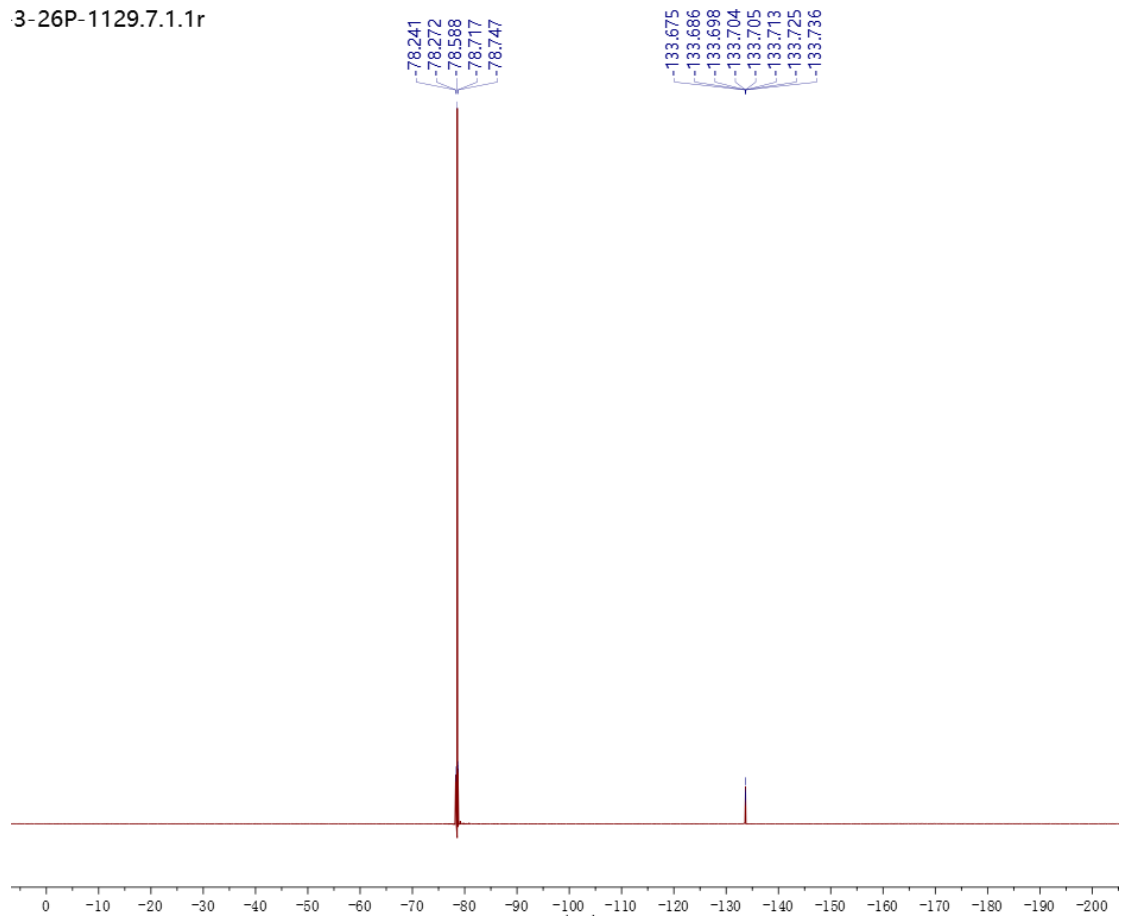

3-26P-1129.2.1.1r

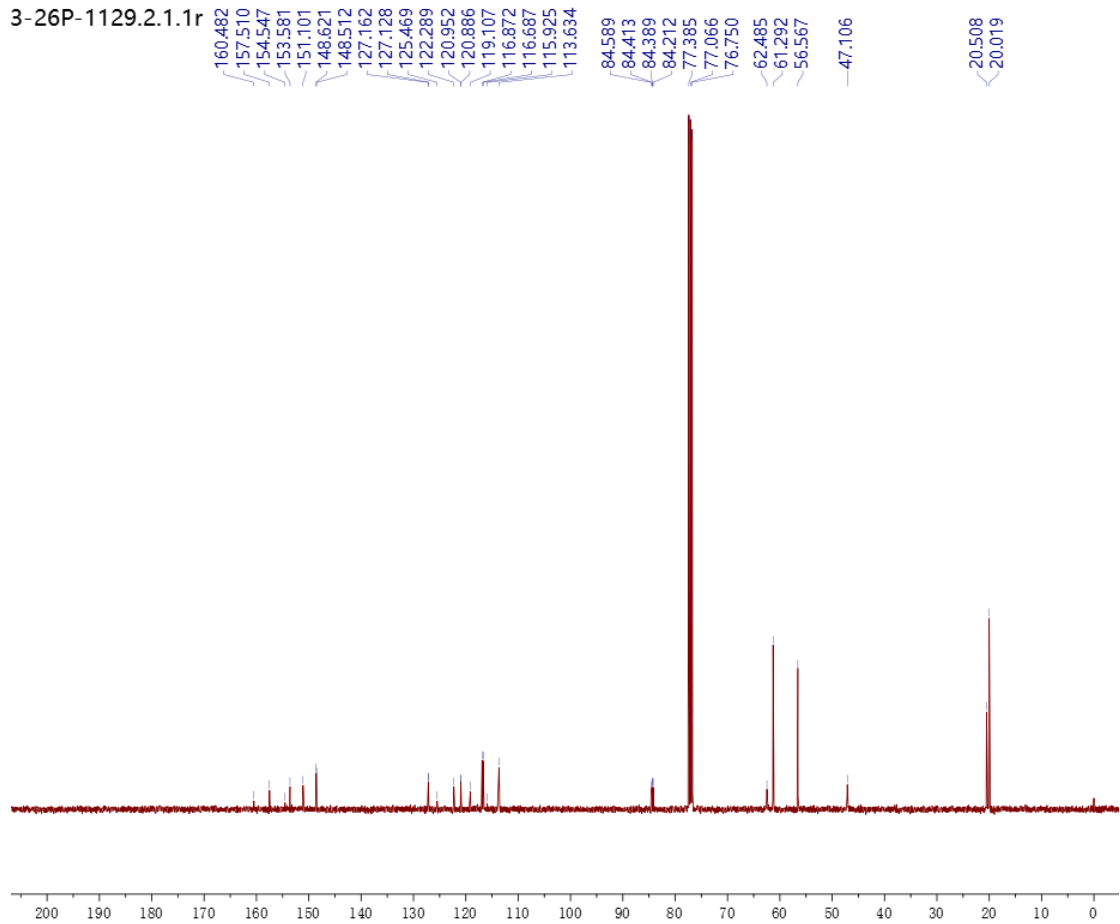

LN-3-26M-1129.1

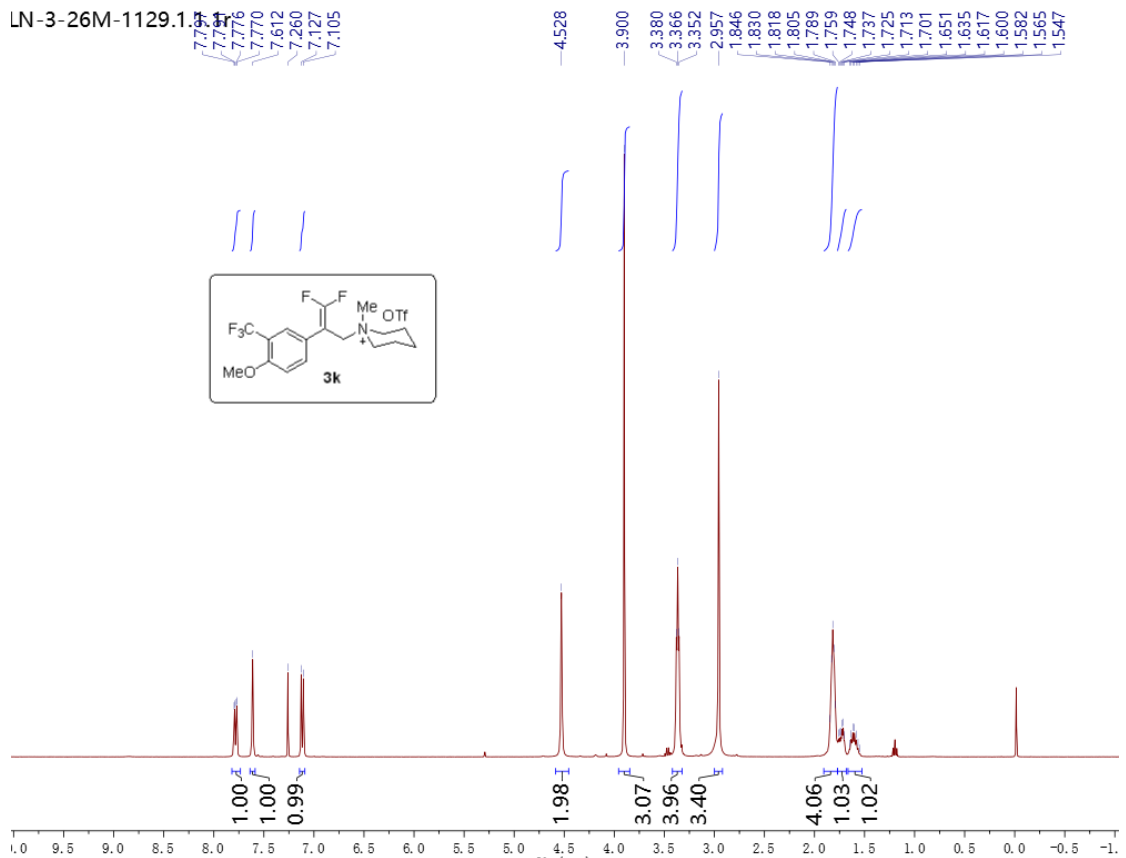

-26M-1129.7.1.1r

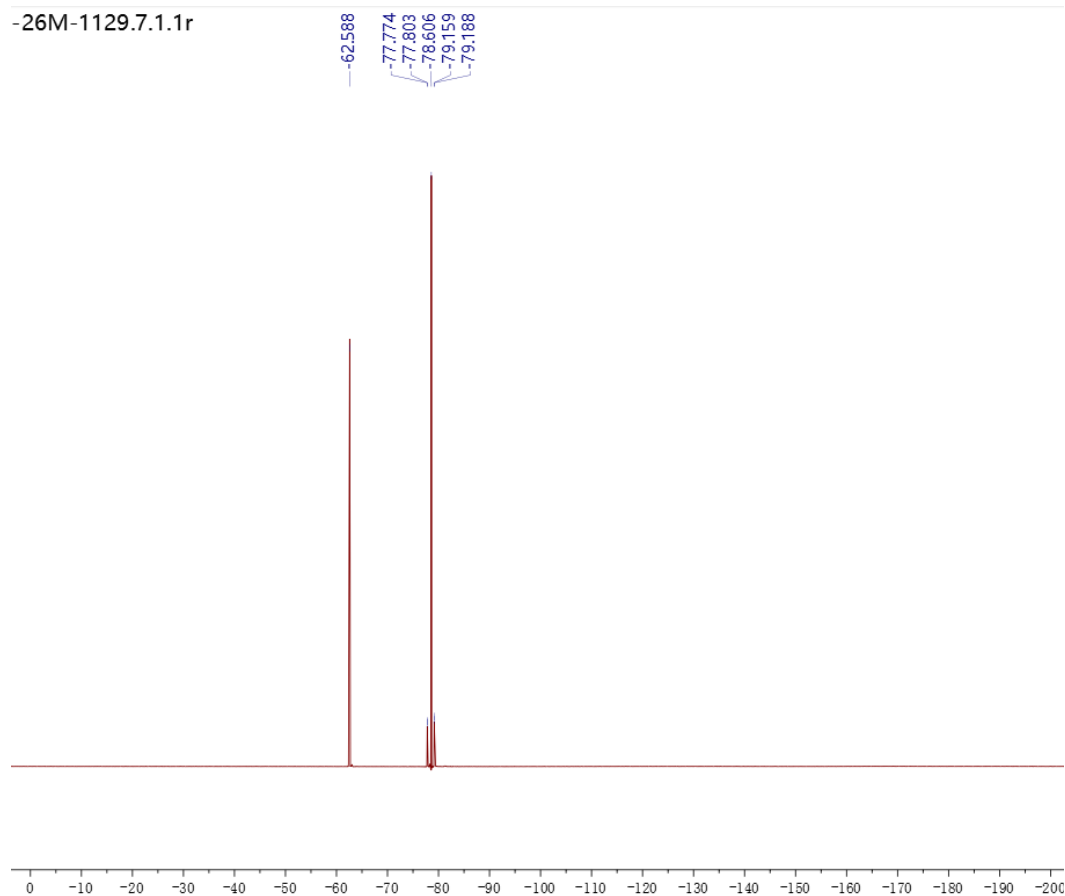

3-26M-1129.2.1

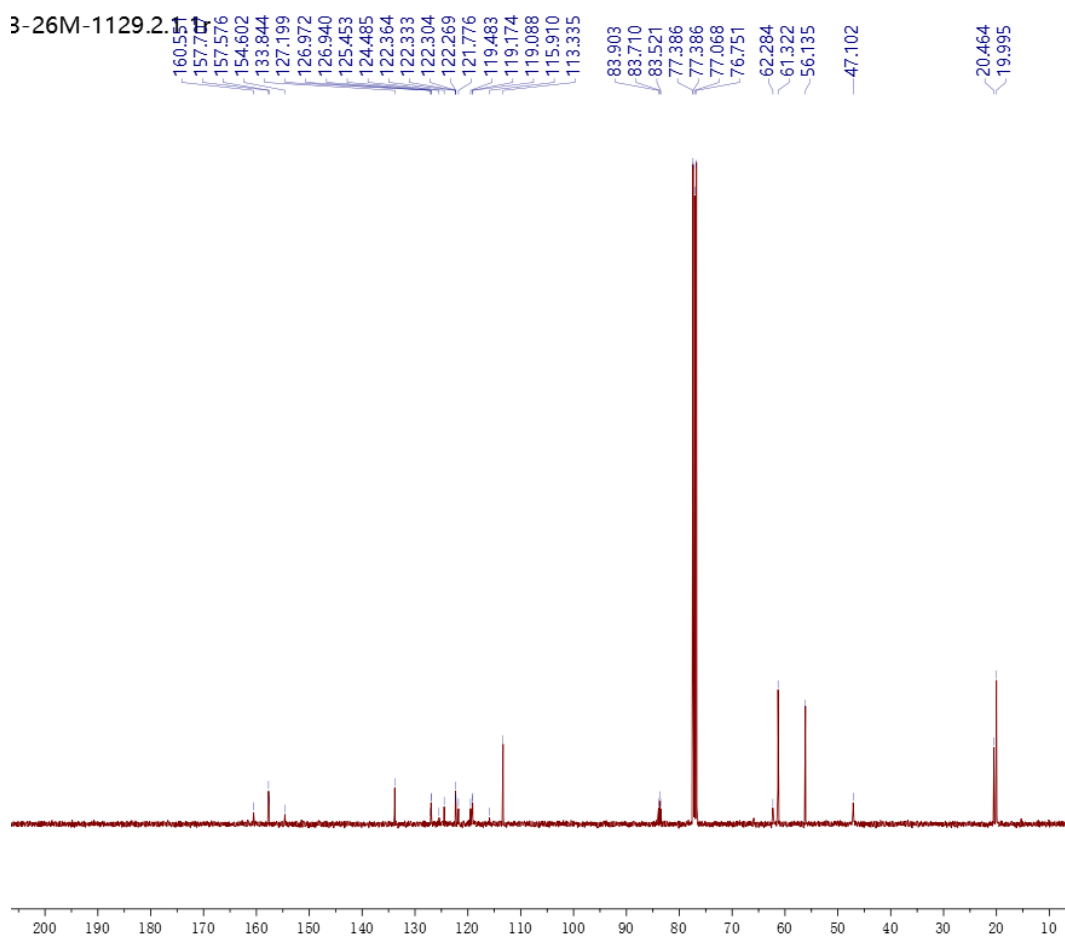



N-3-26O-1129.1.1.1r

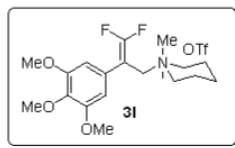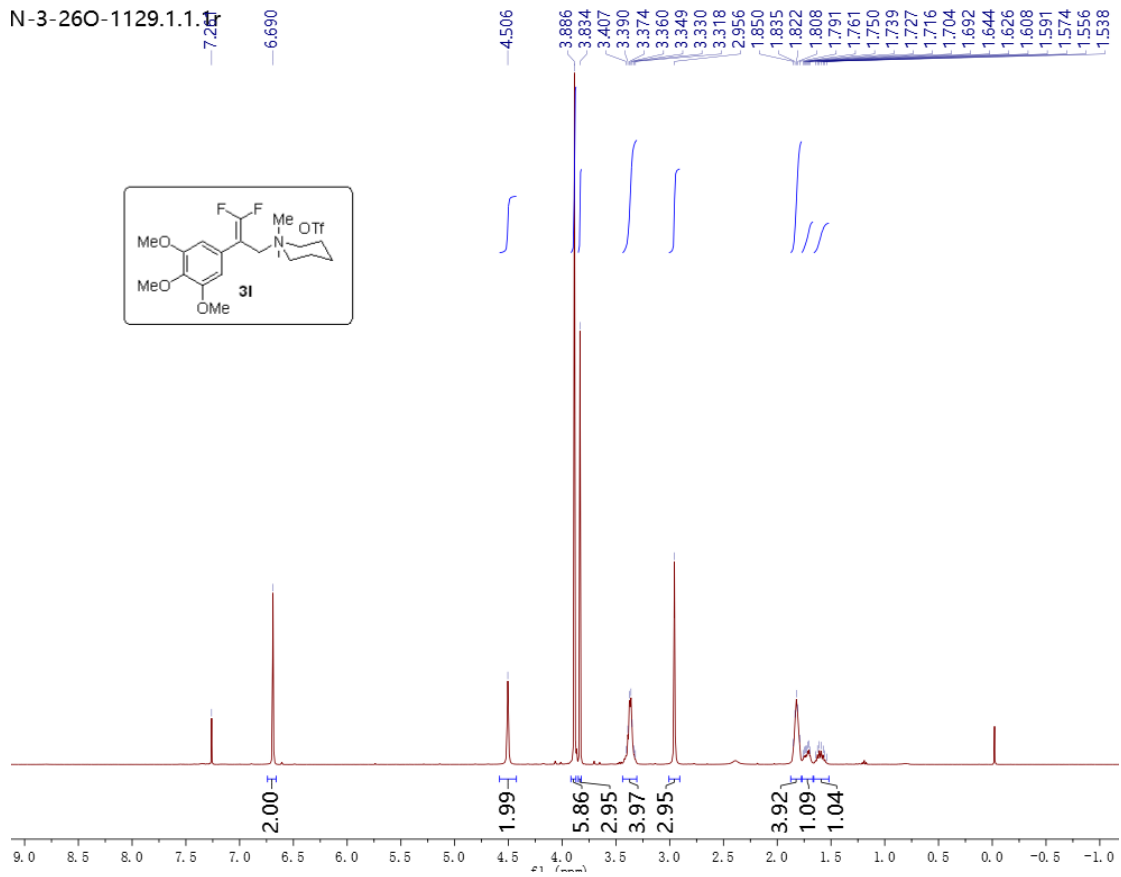

-3-26O-1129.7.1.1r

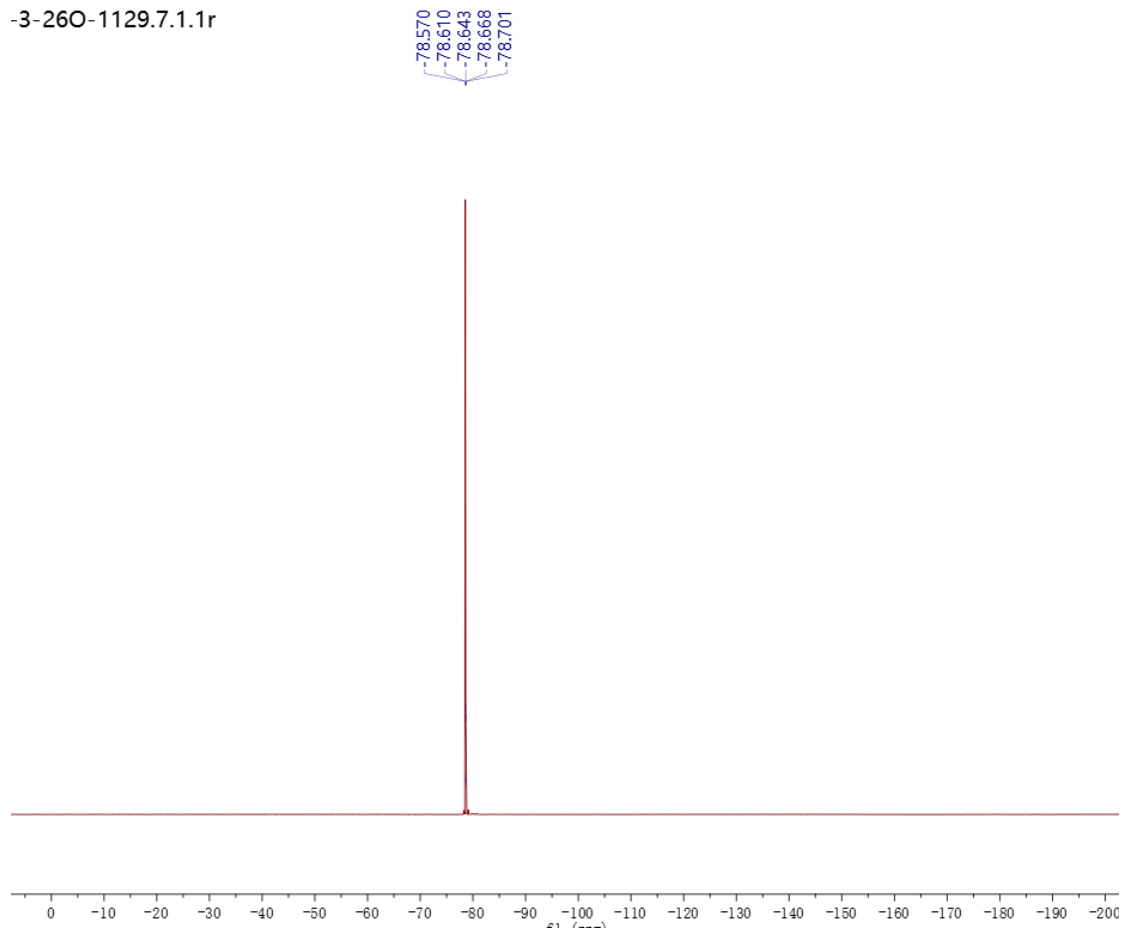

N-3-26O-1129.2

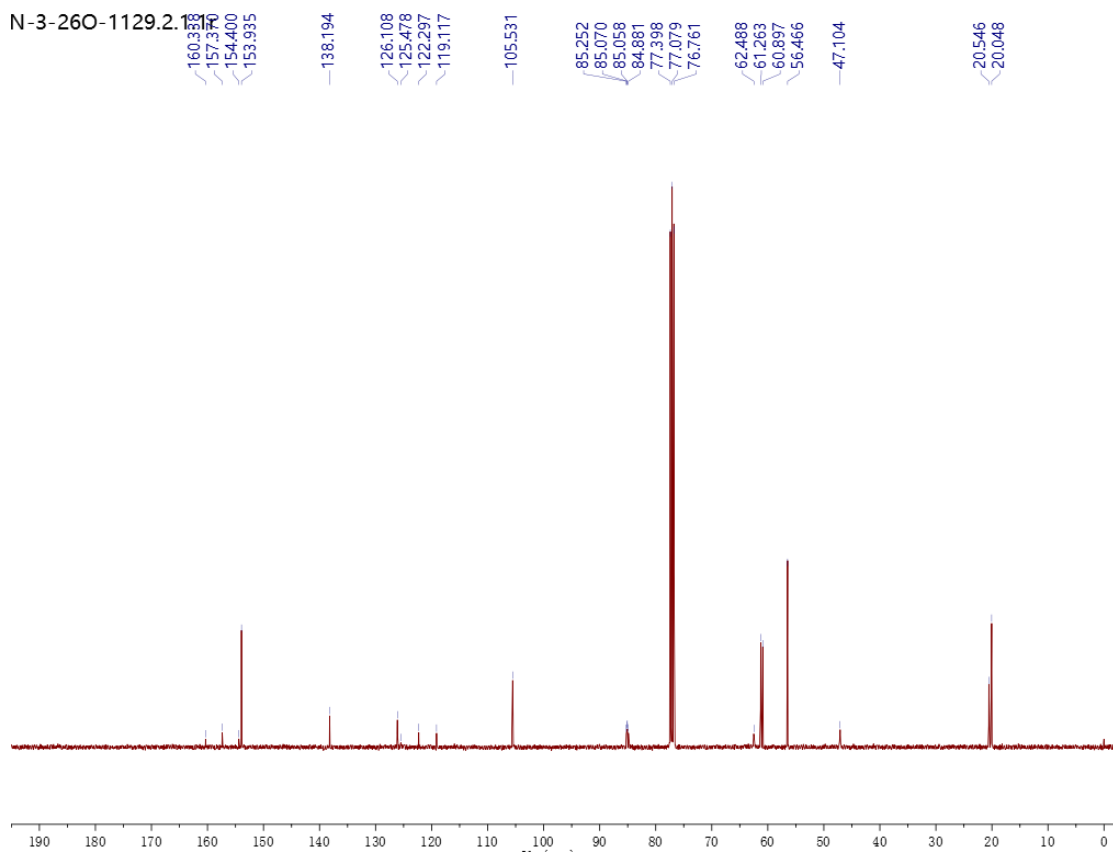

LN-3-26N-1129

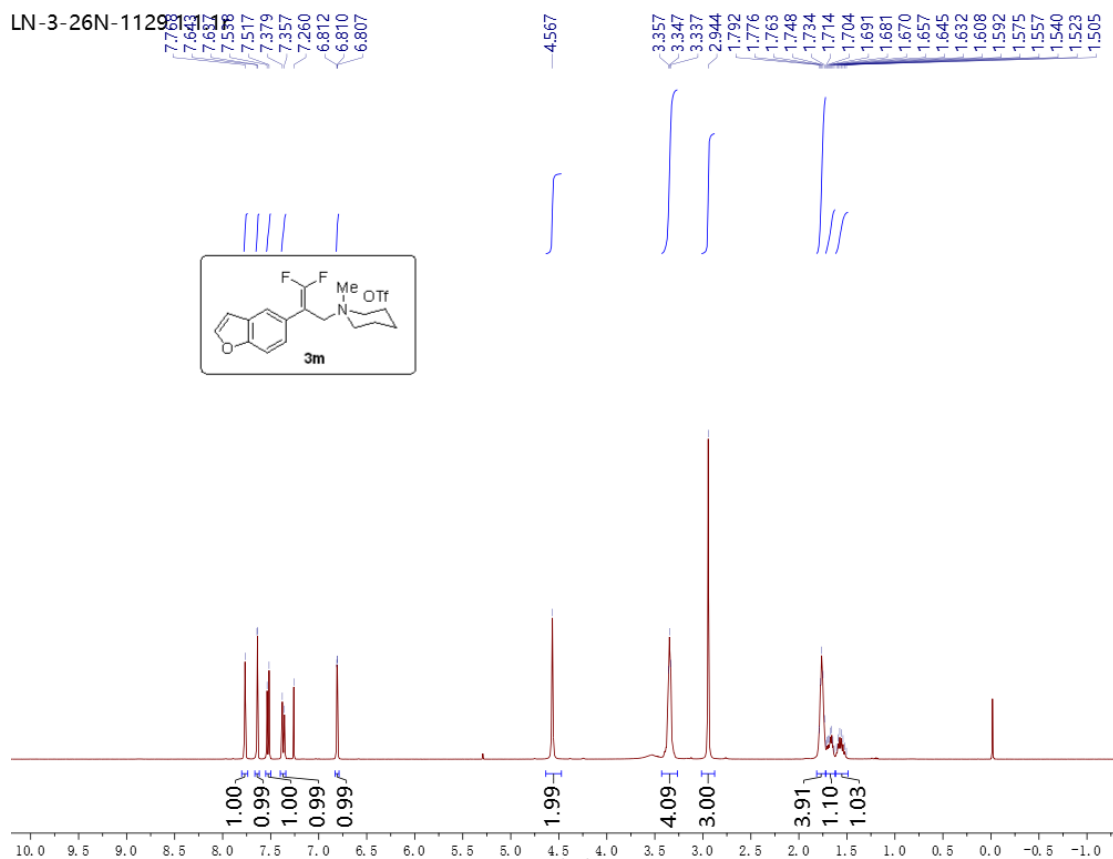

3-26N-1129.7.1.1r

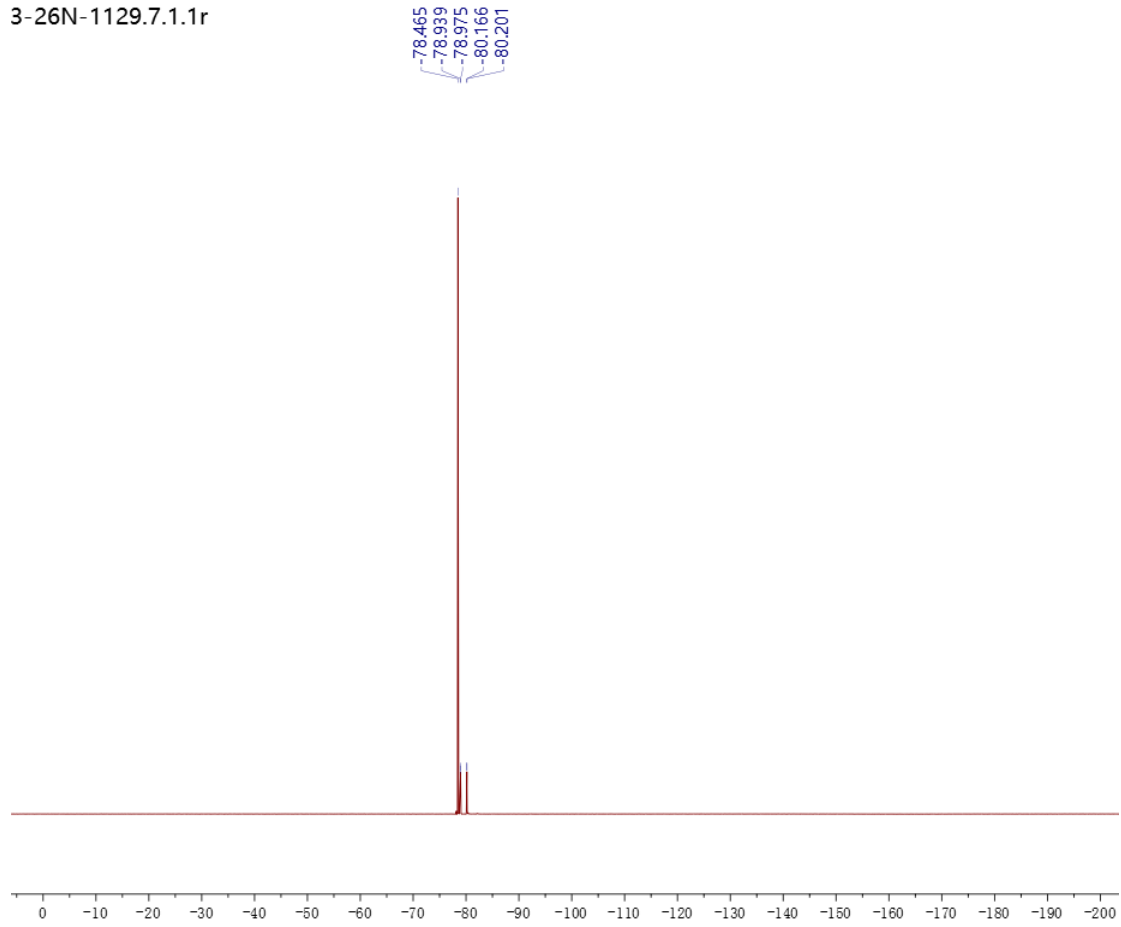

FLN-3-26N-122.2.1.

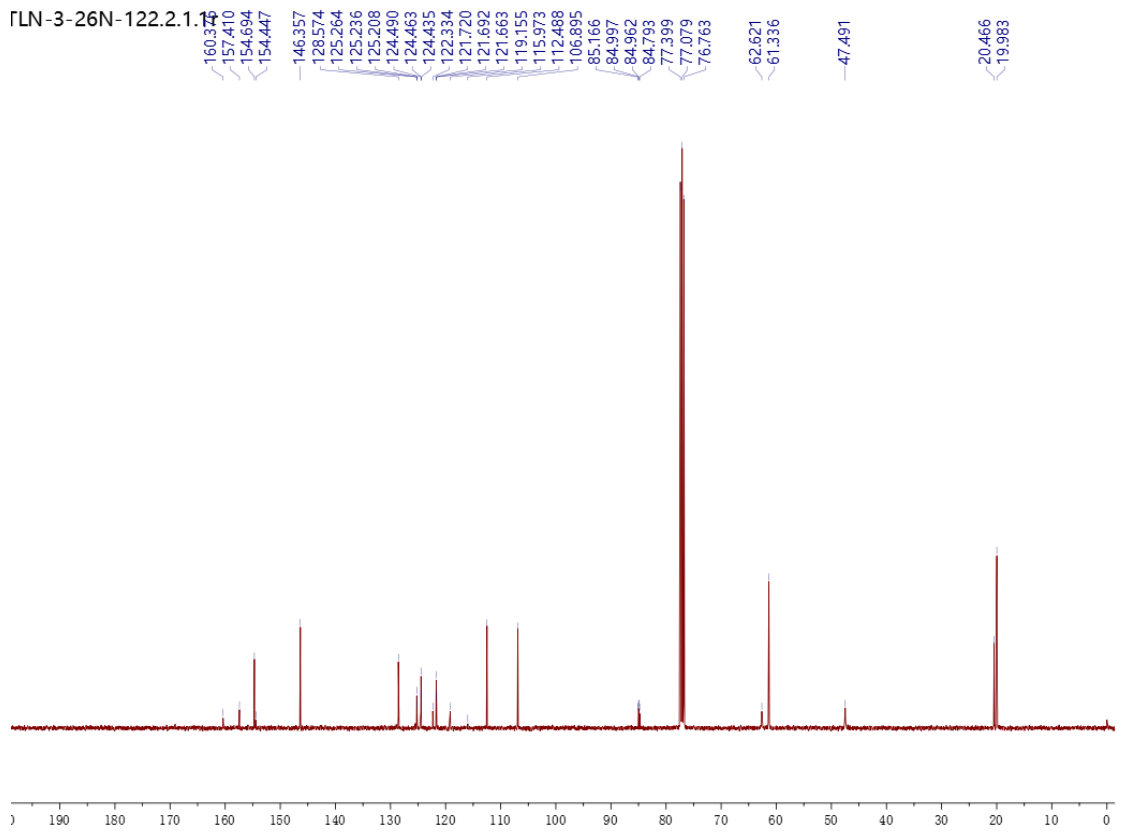

LN-3-26C-1129.1.1.1r

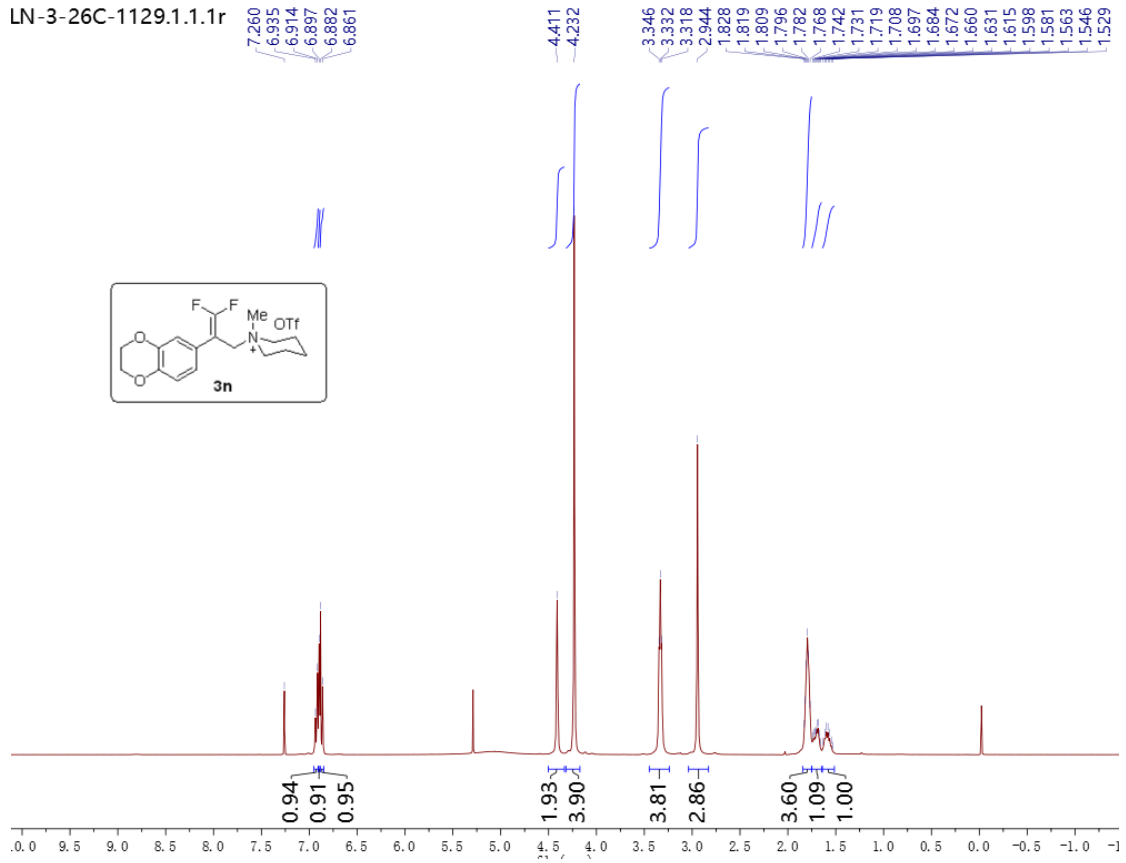

-3-26C-1129.7.1.1r

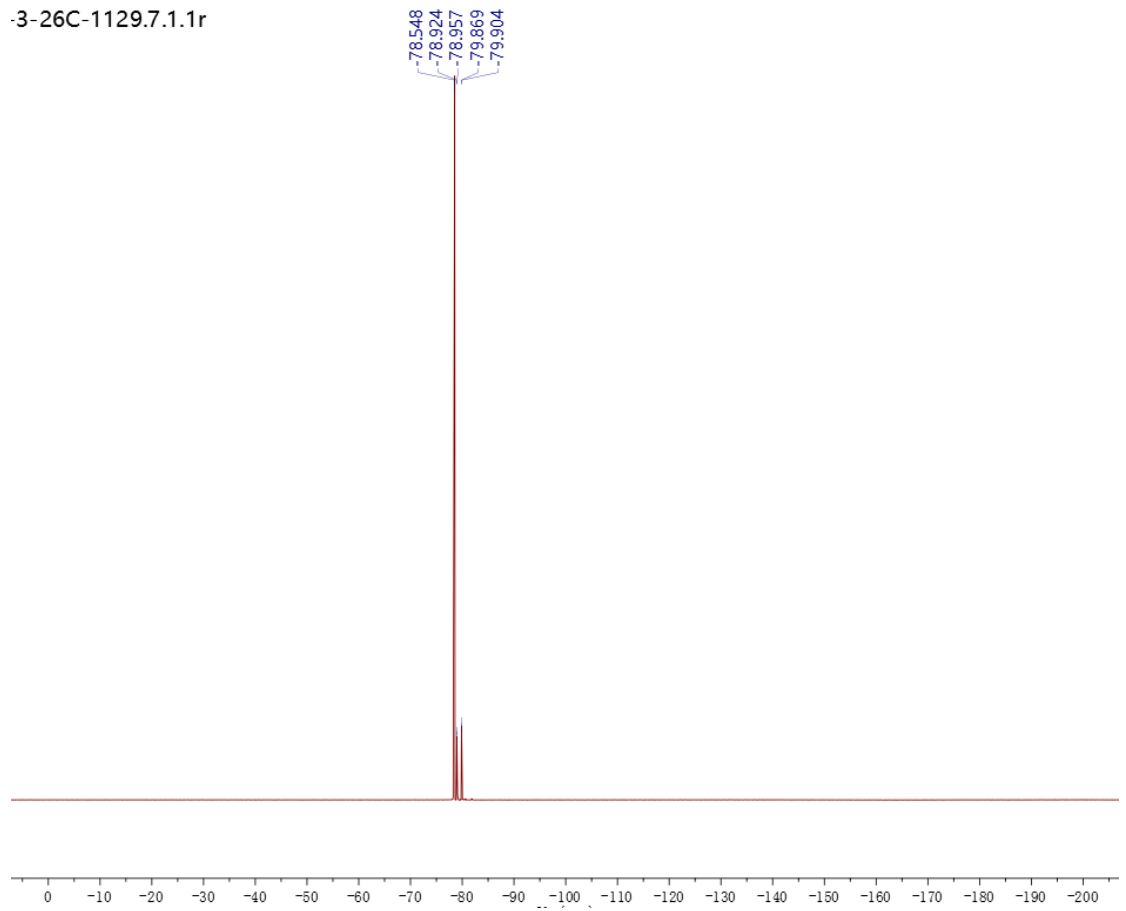

3-26C-1129.2.1.1r

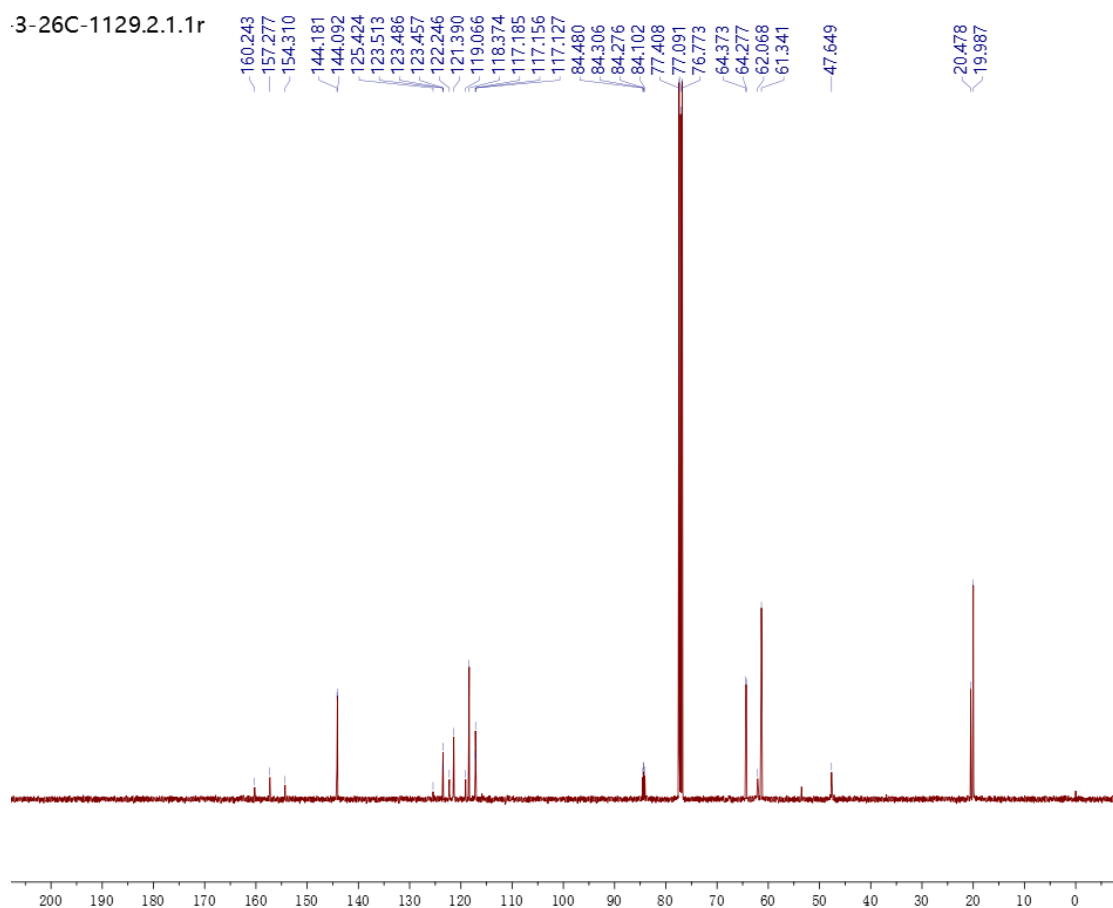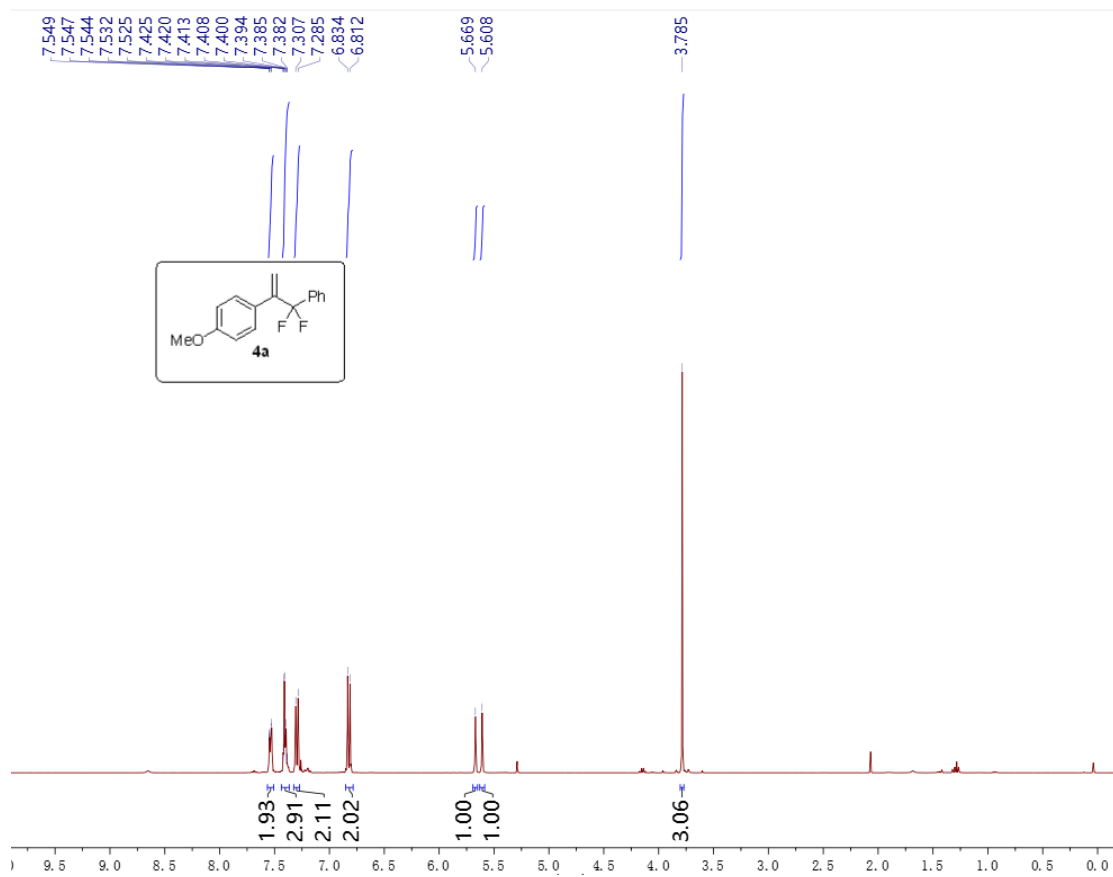

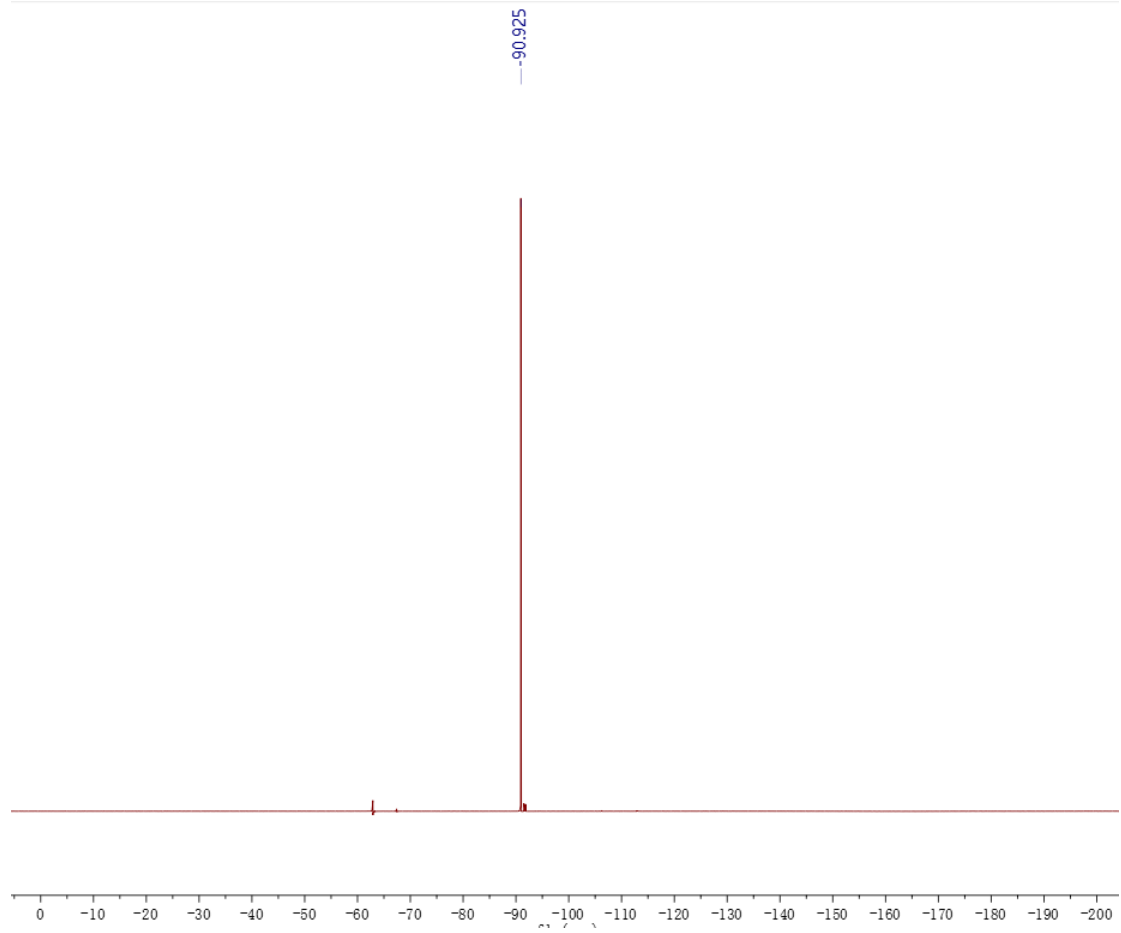

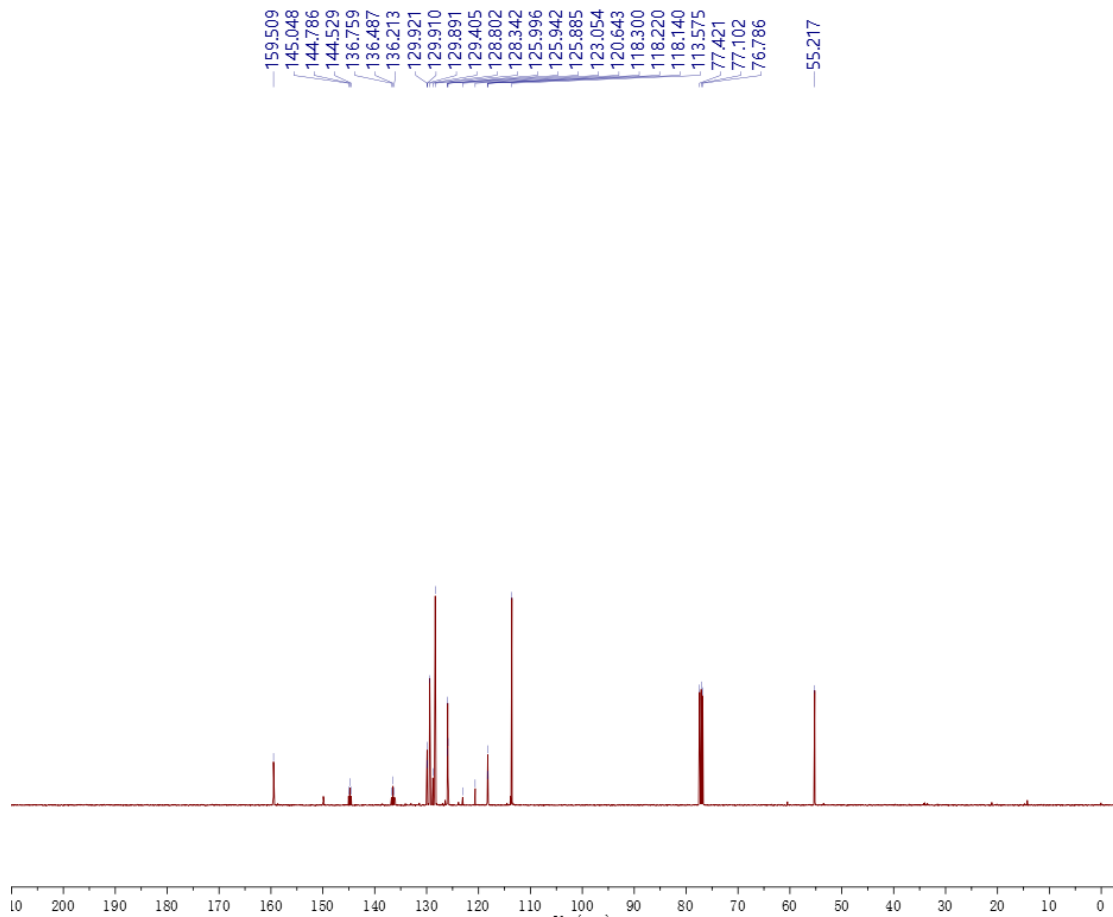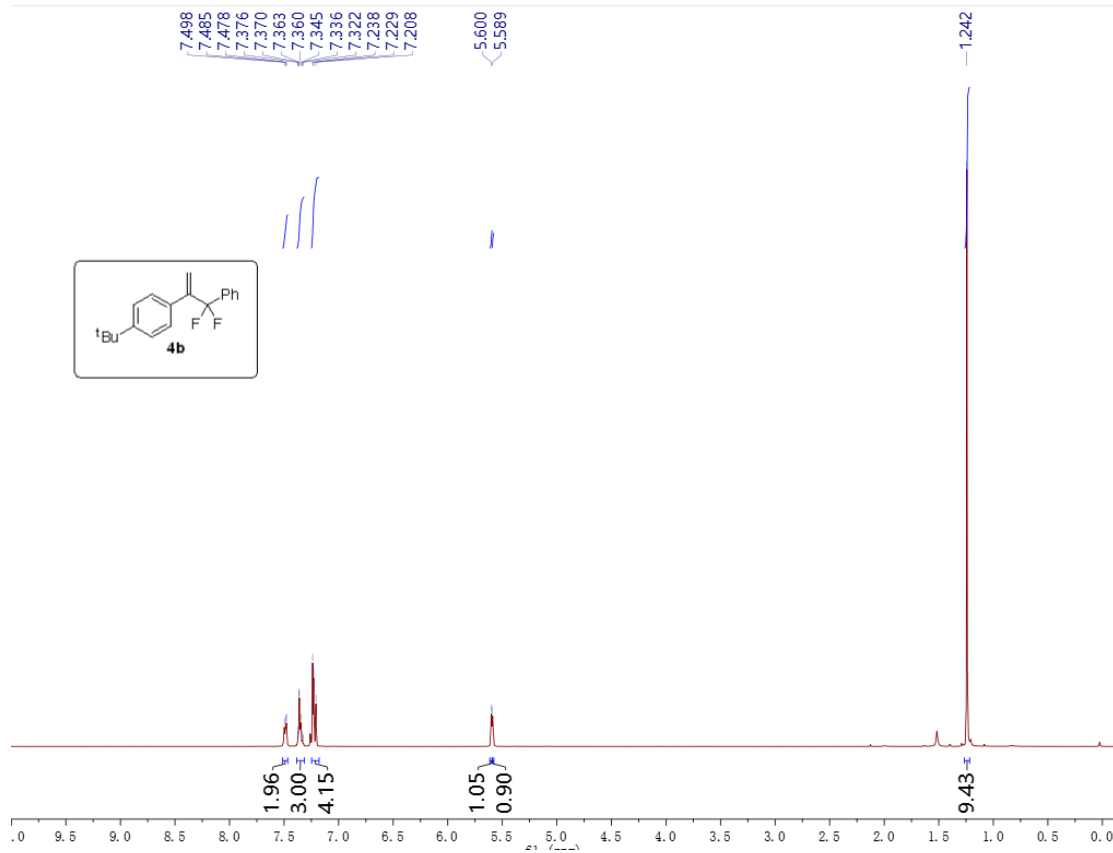

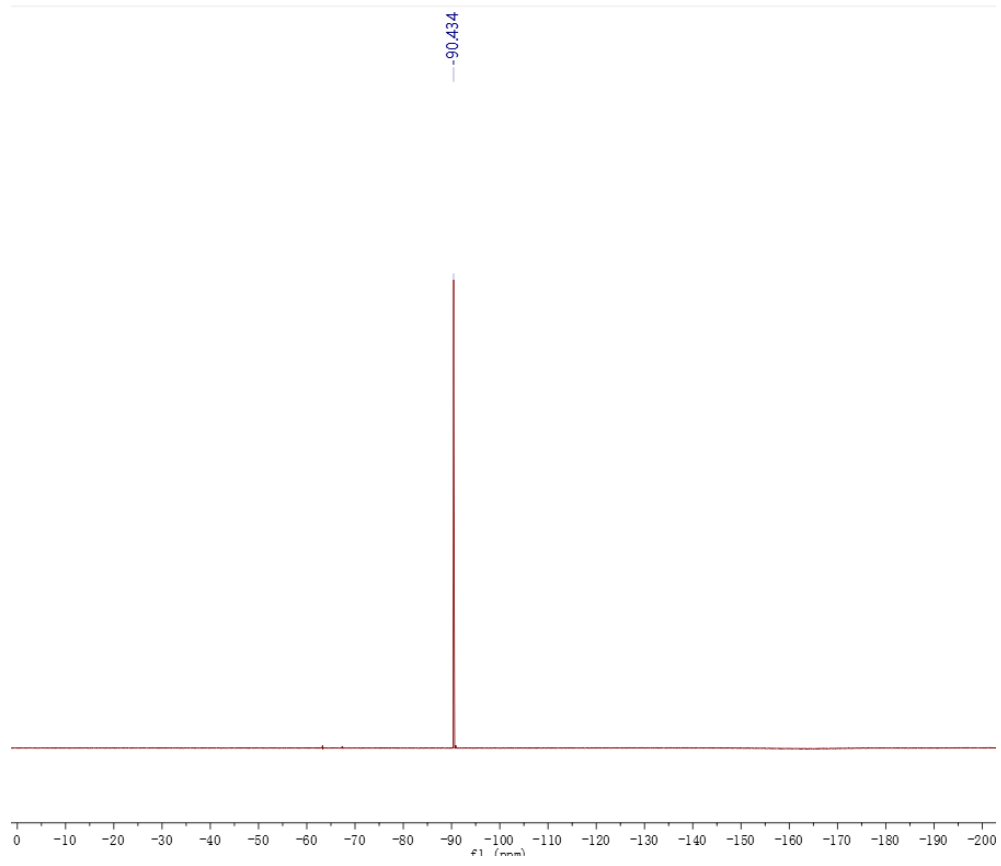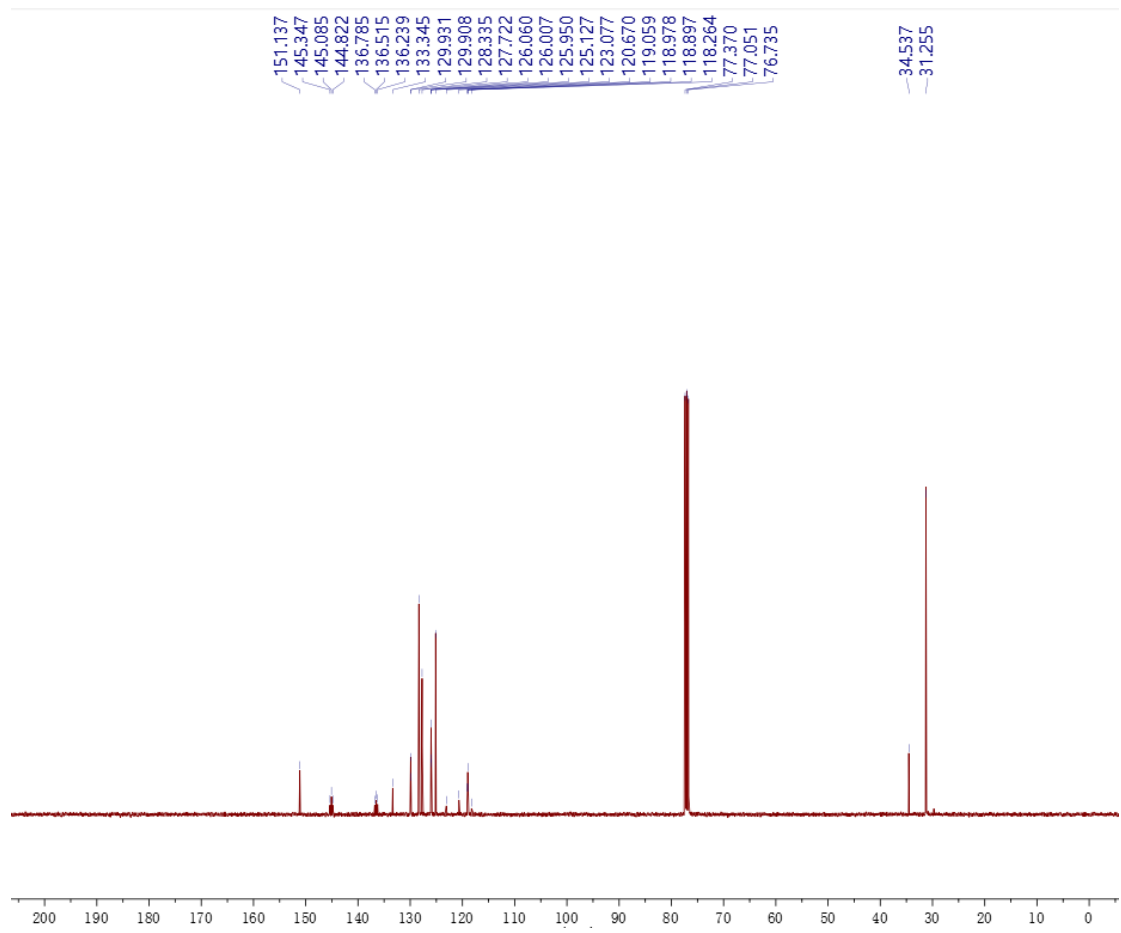



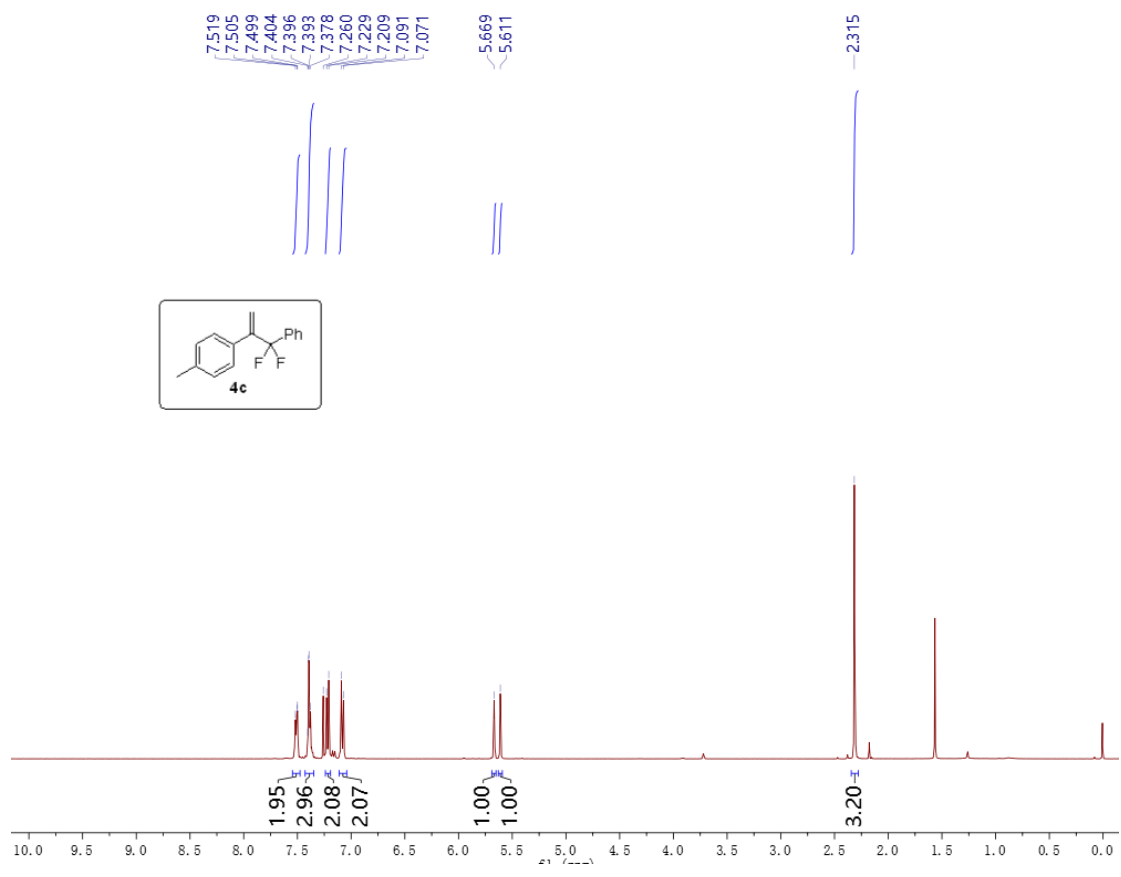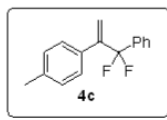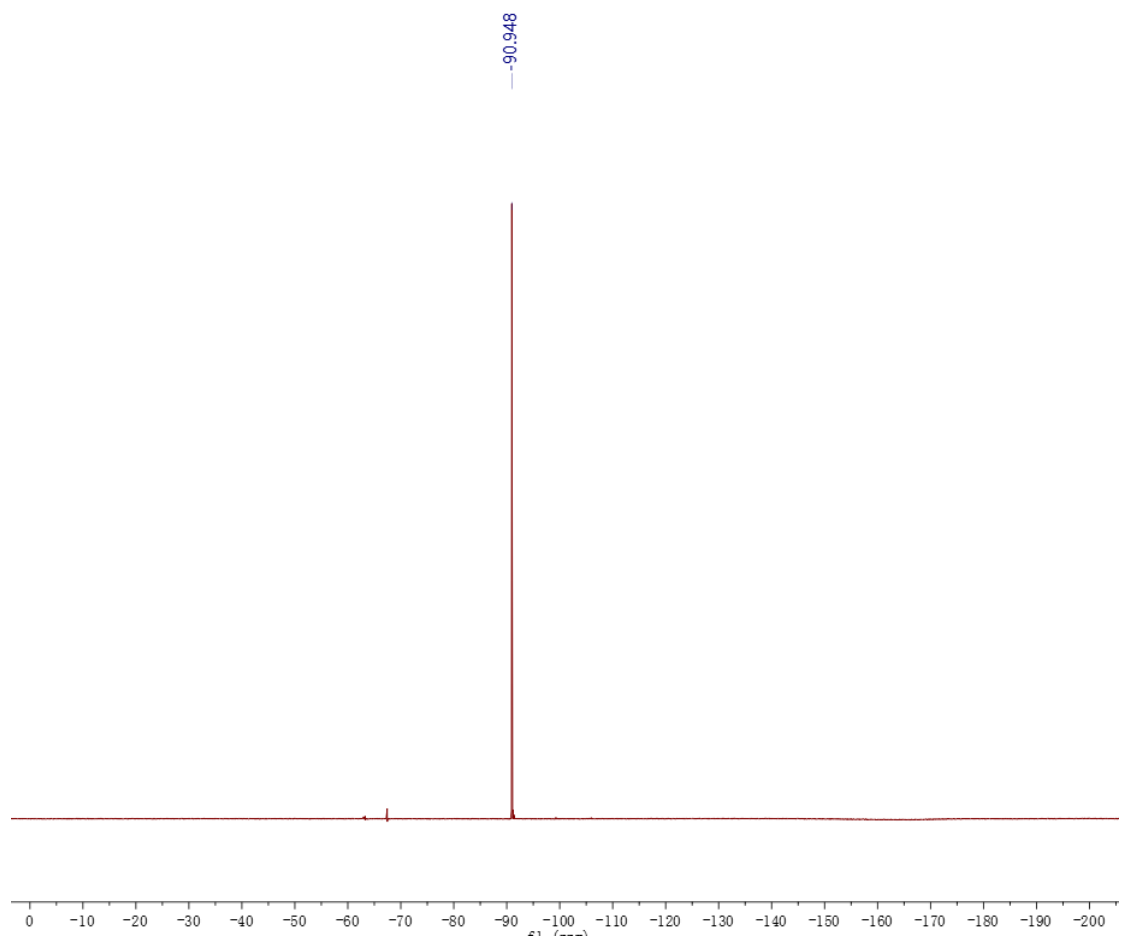

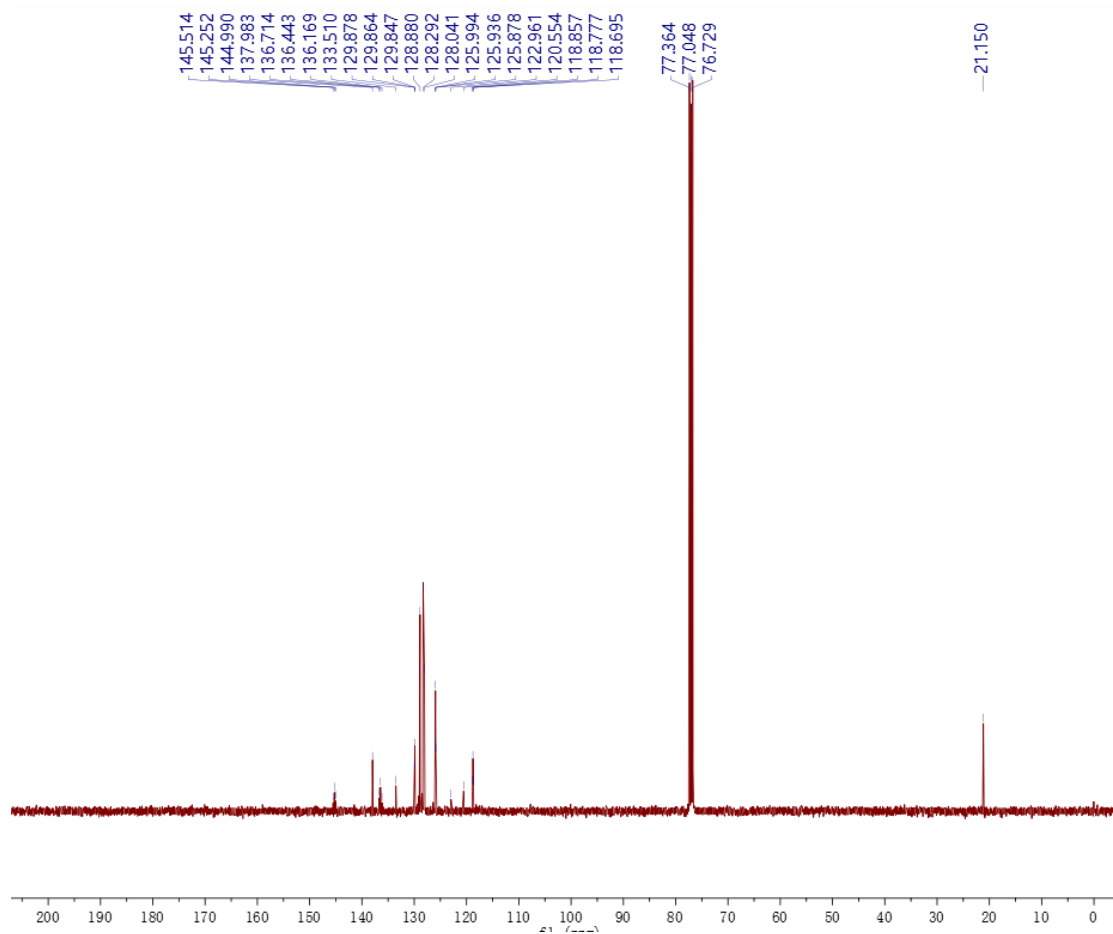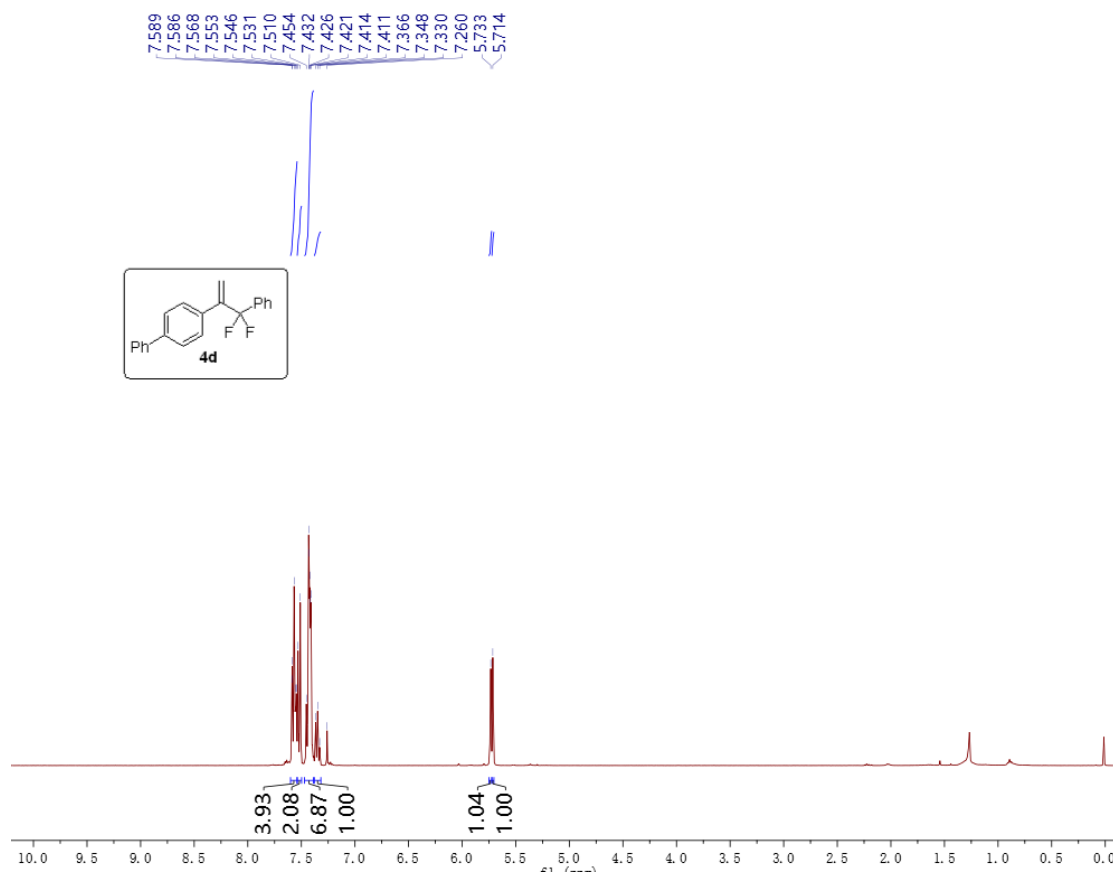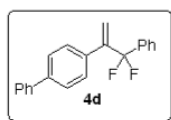

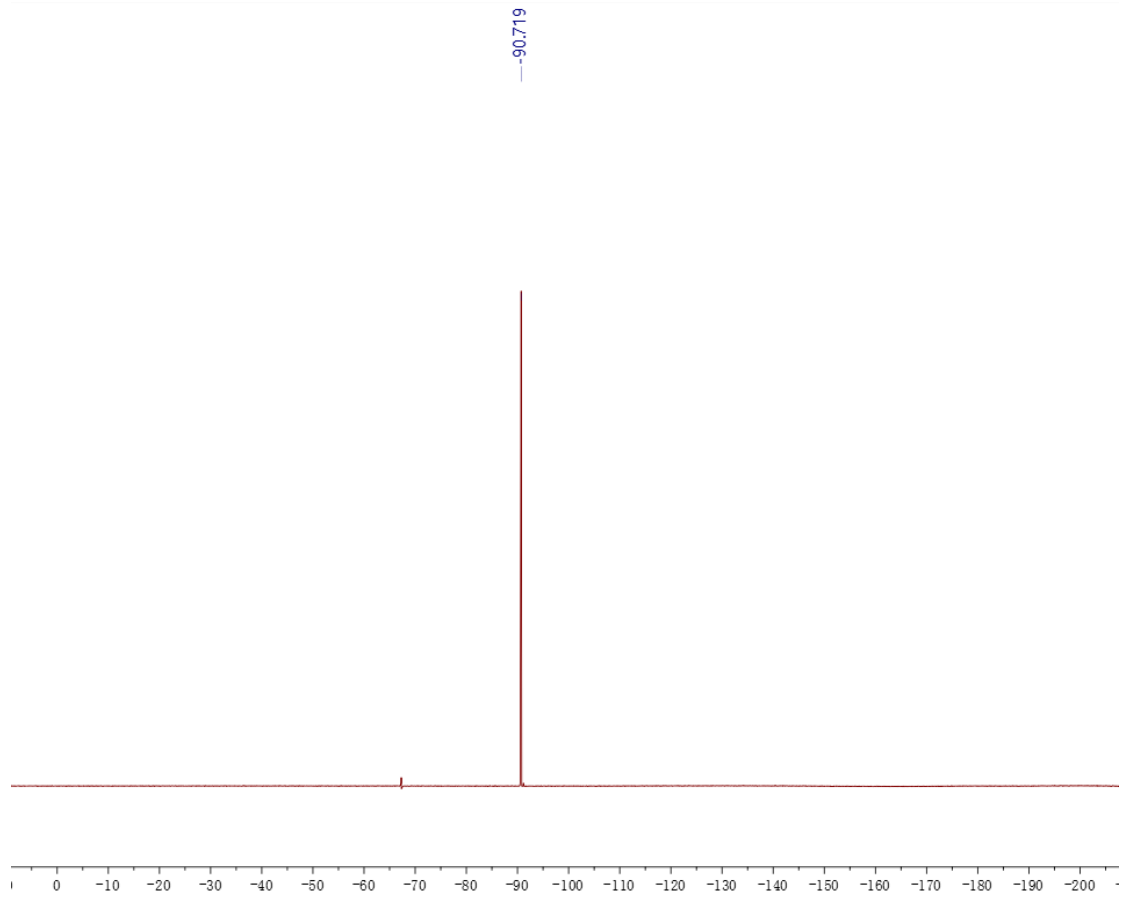

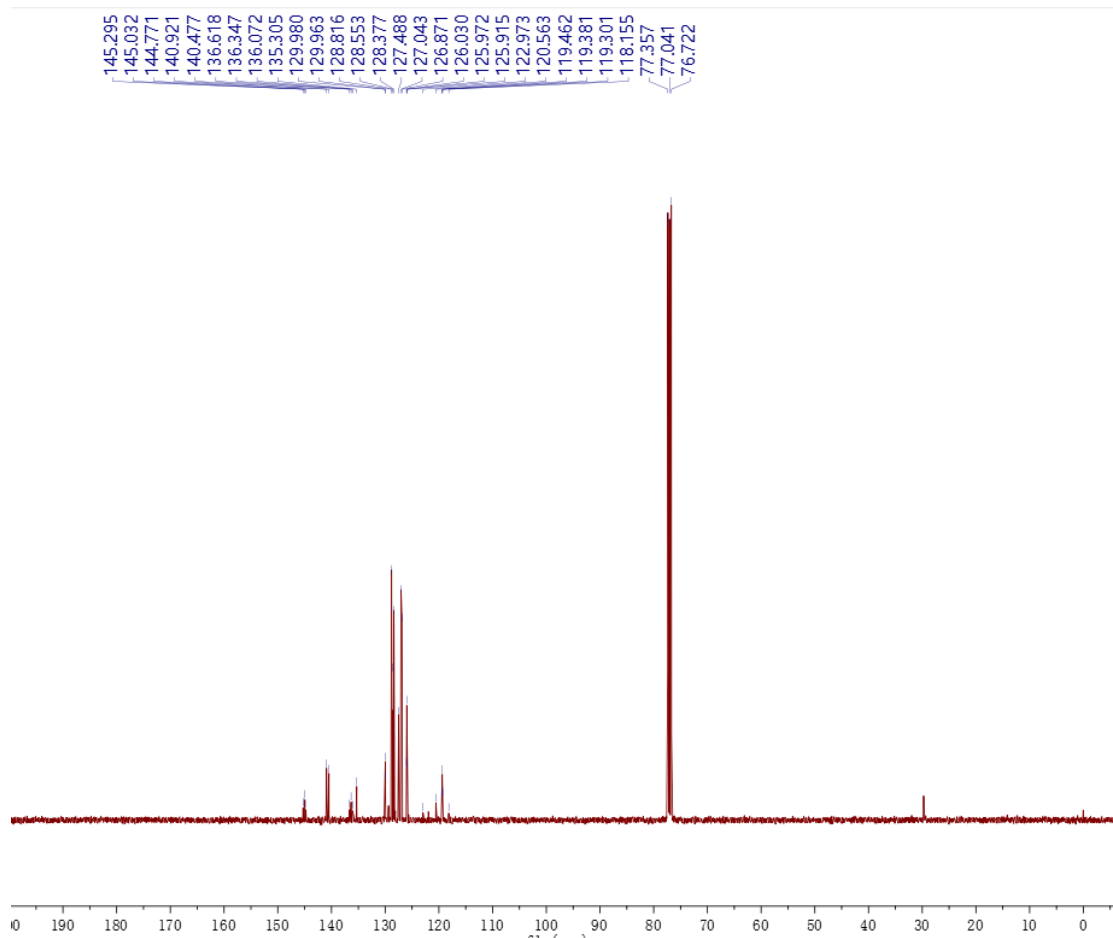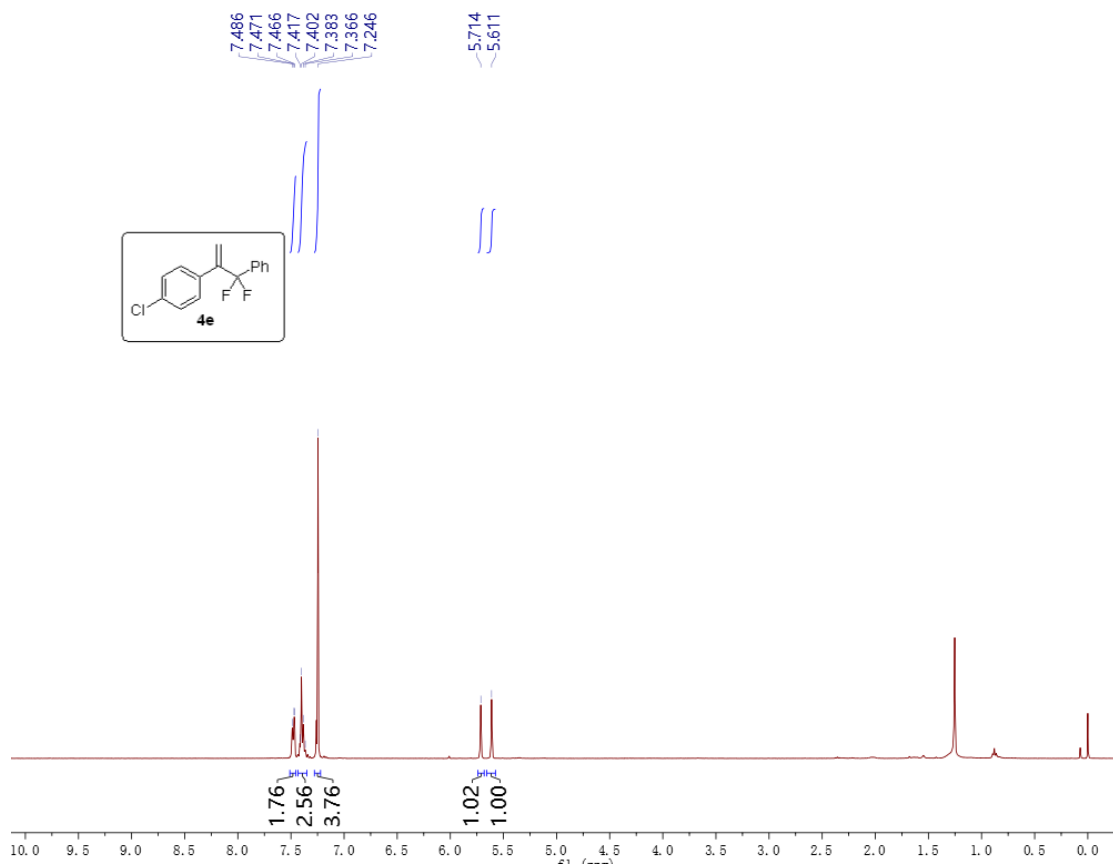

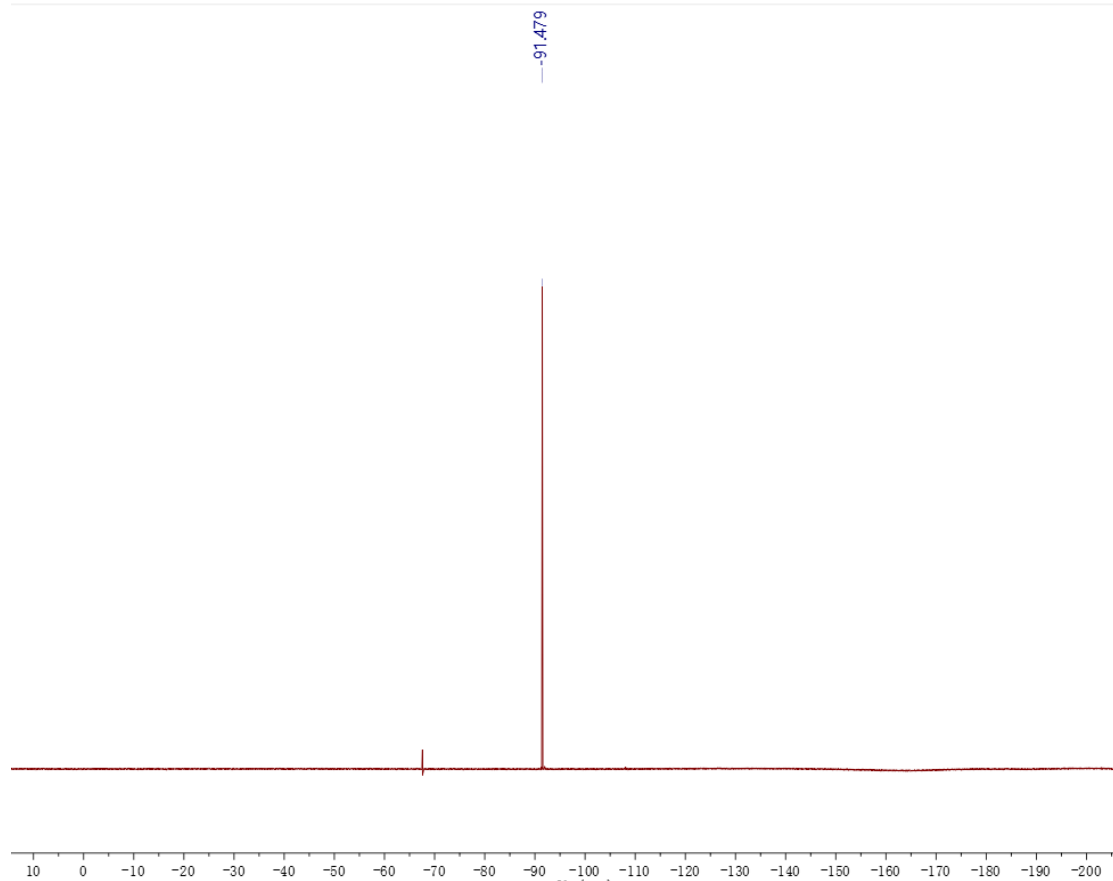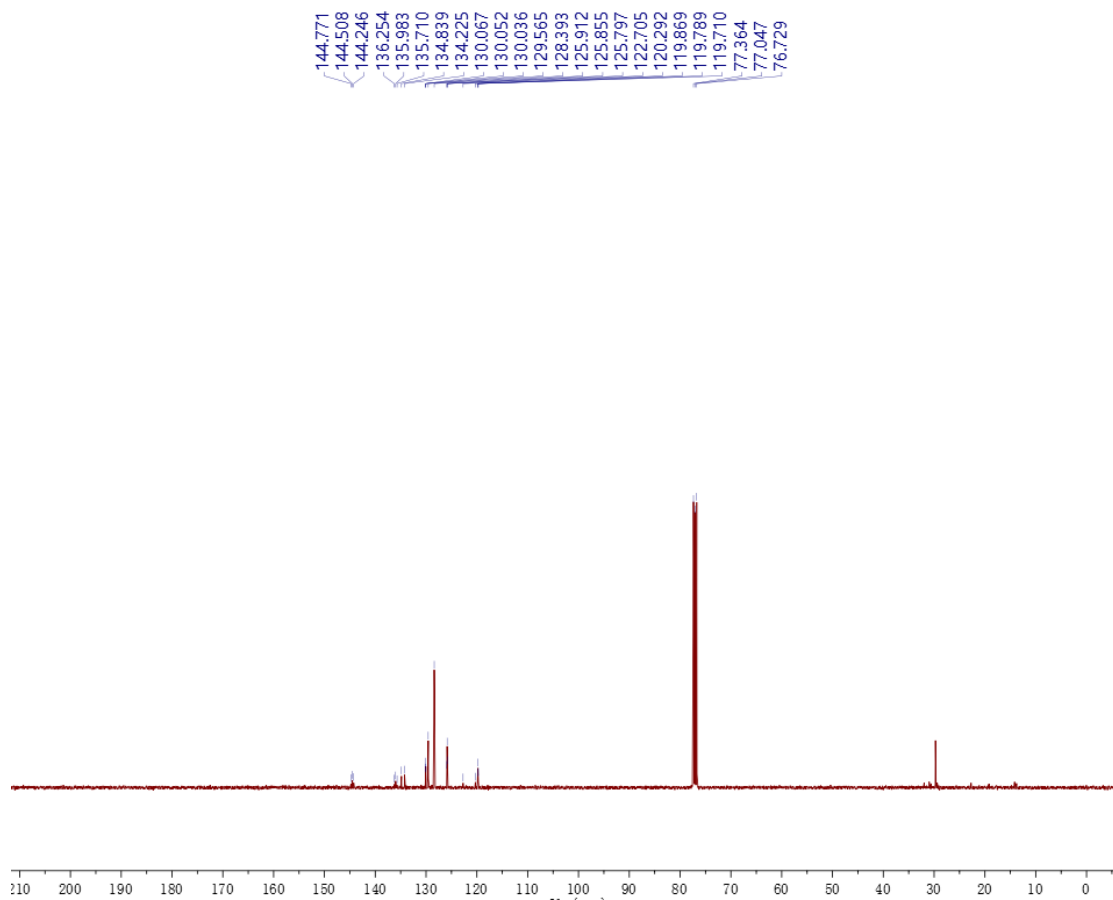

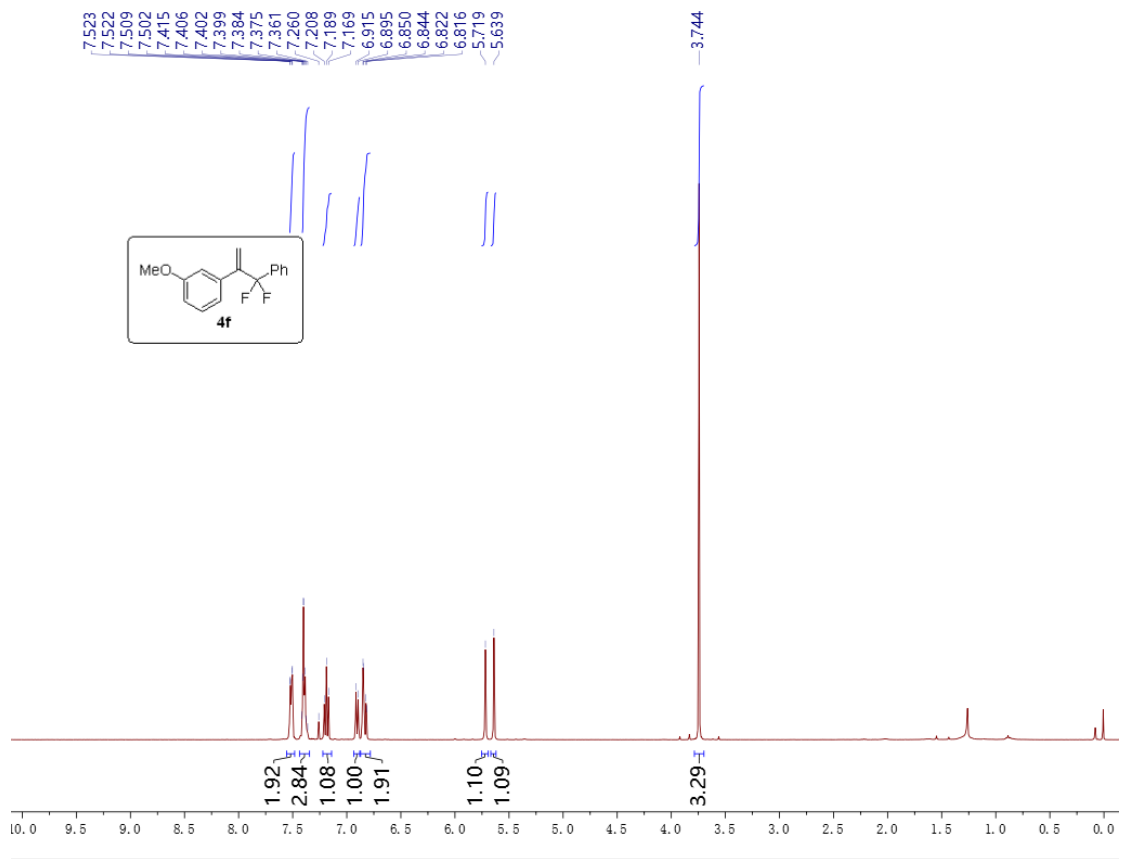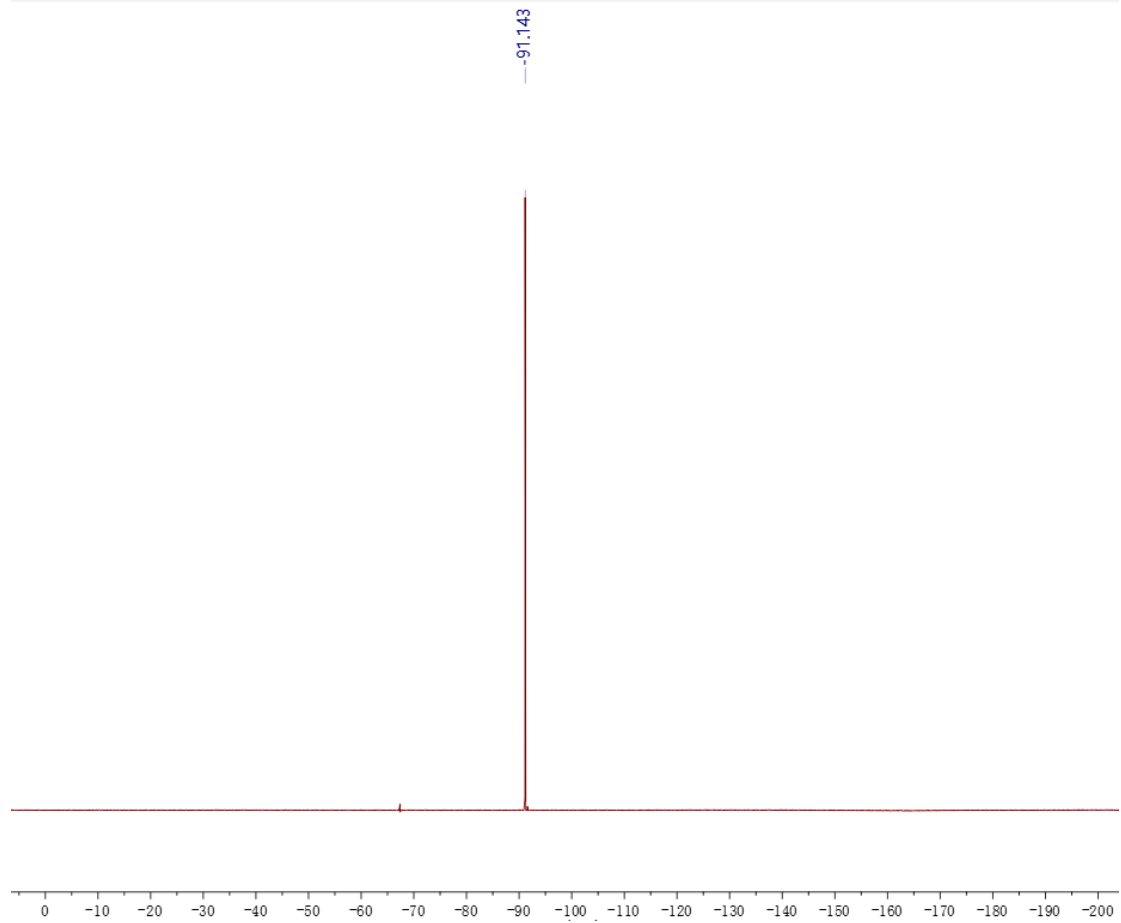

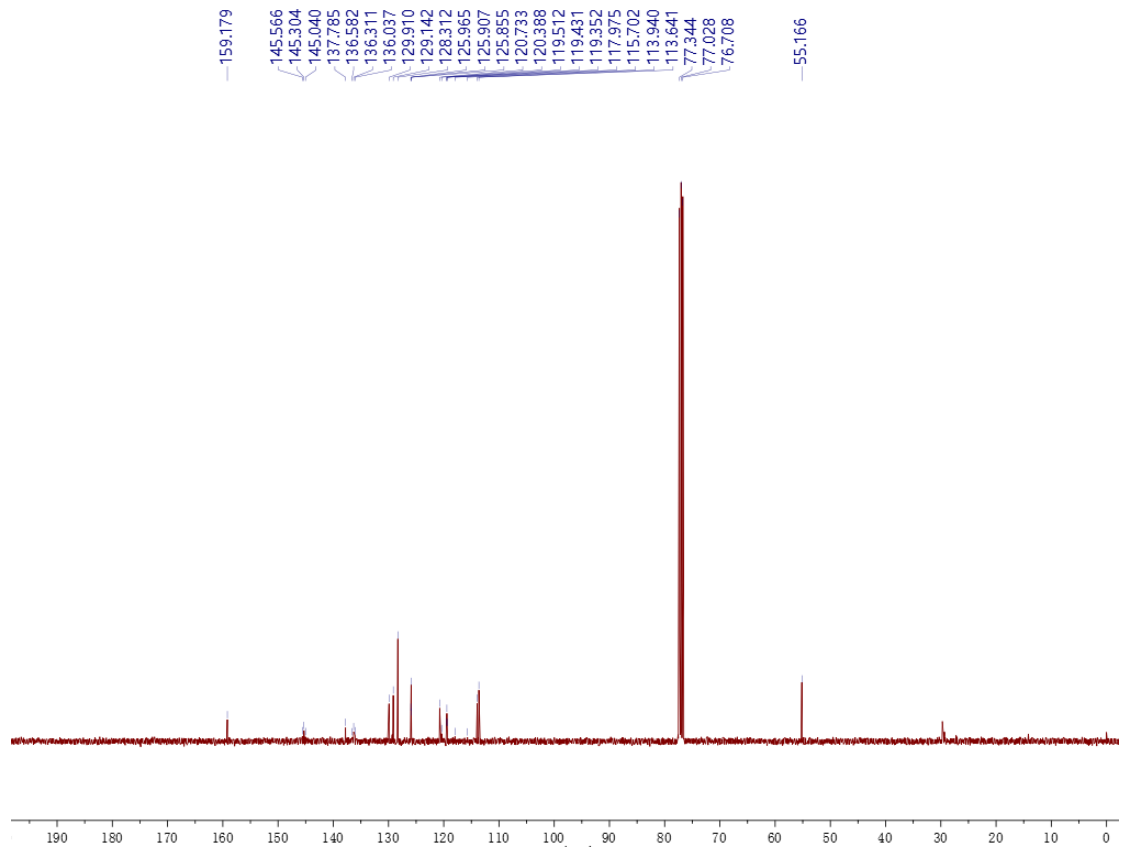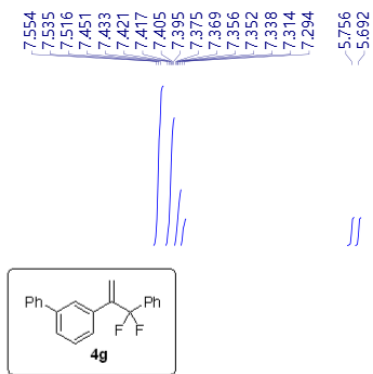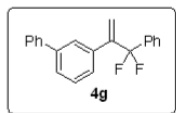

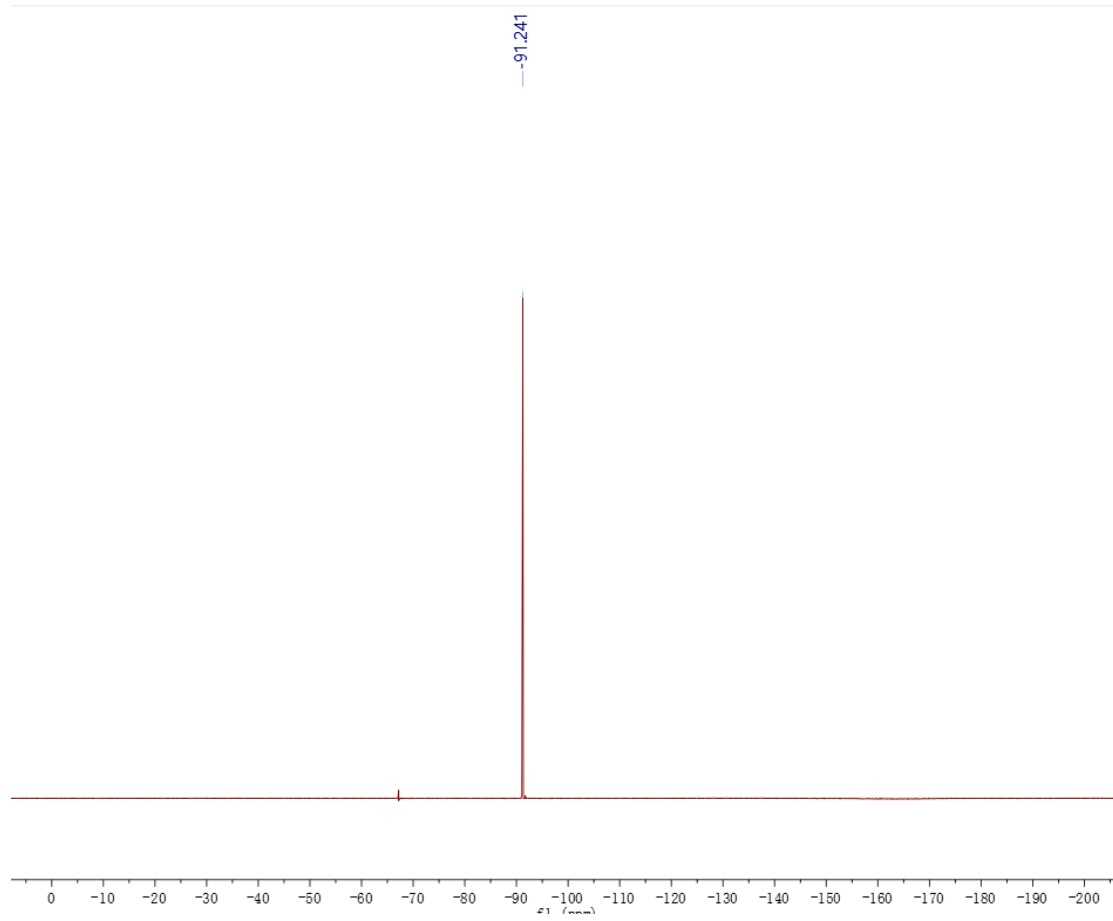



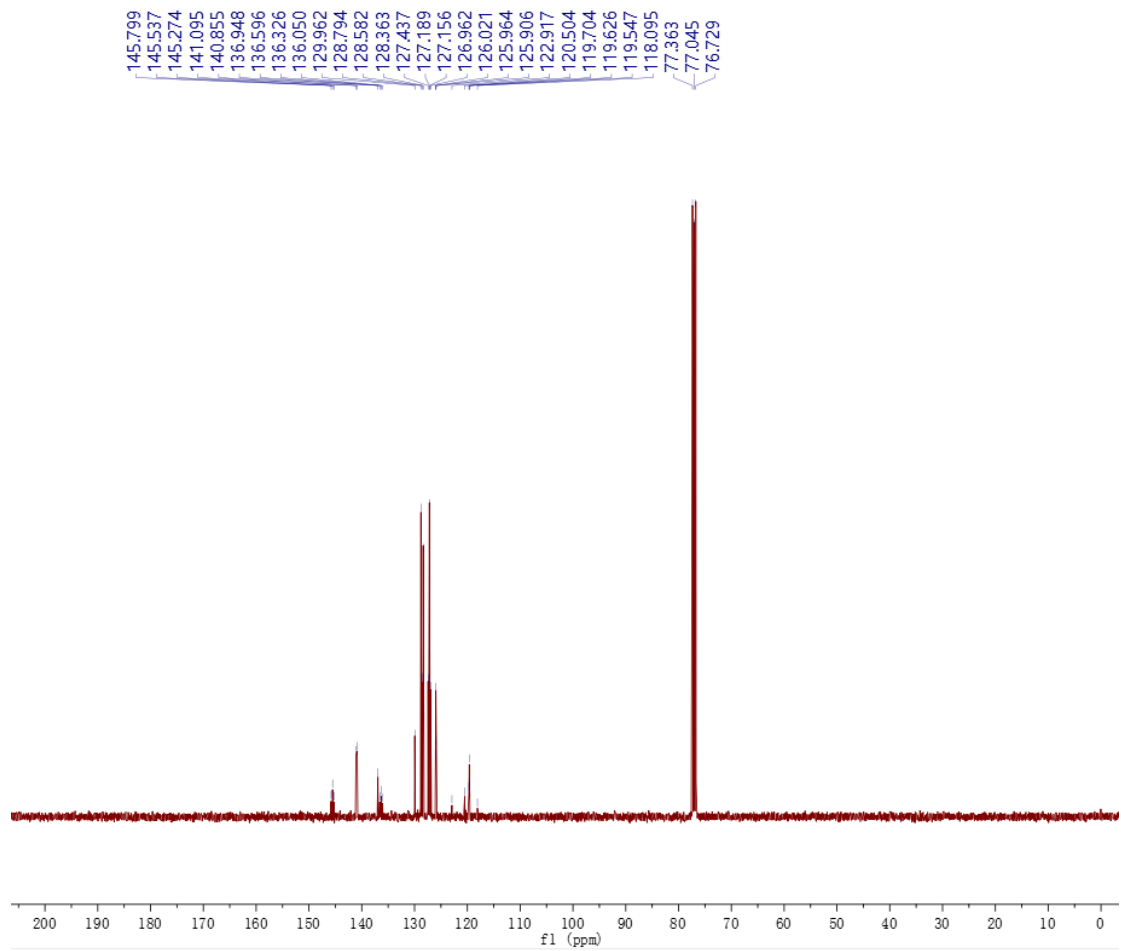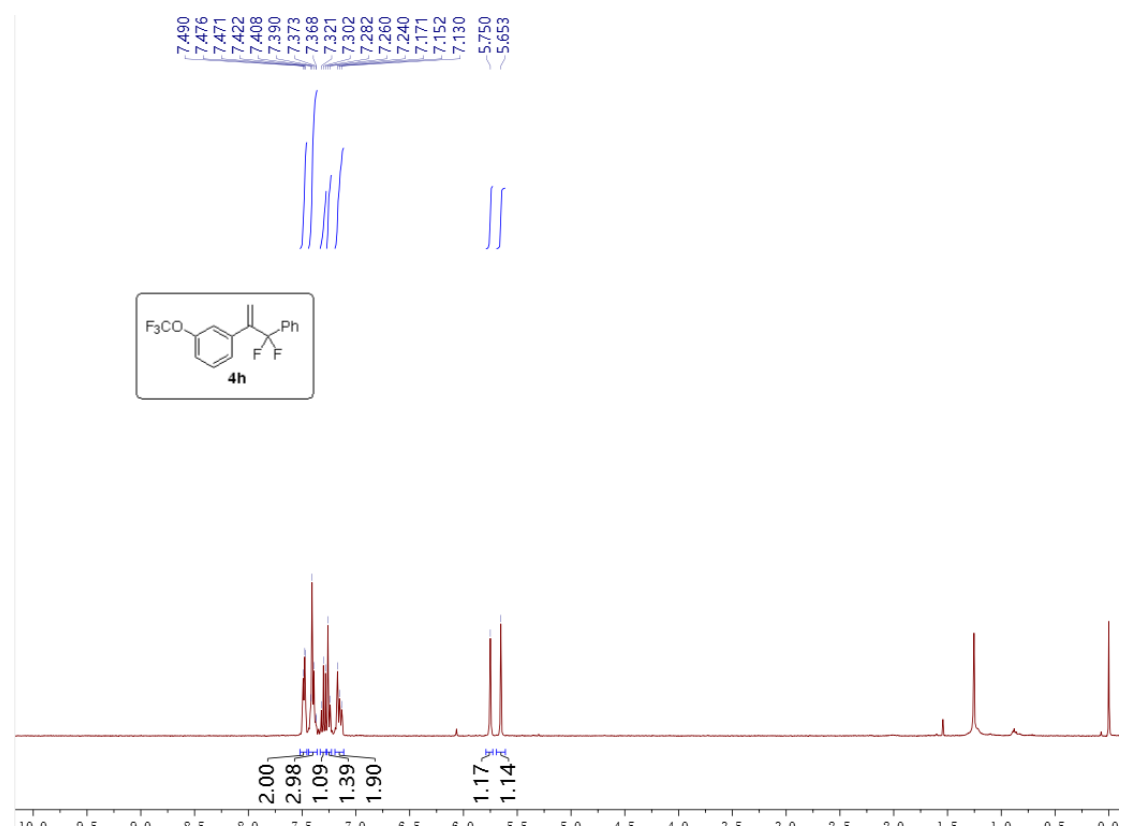

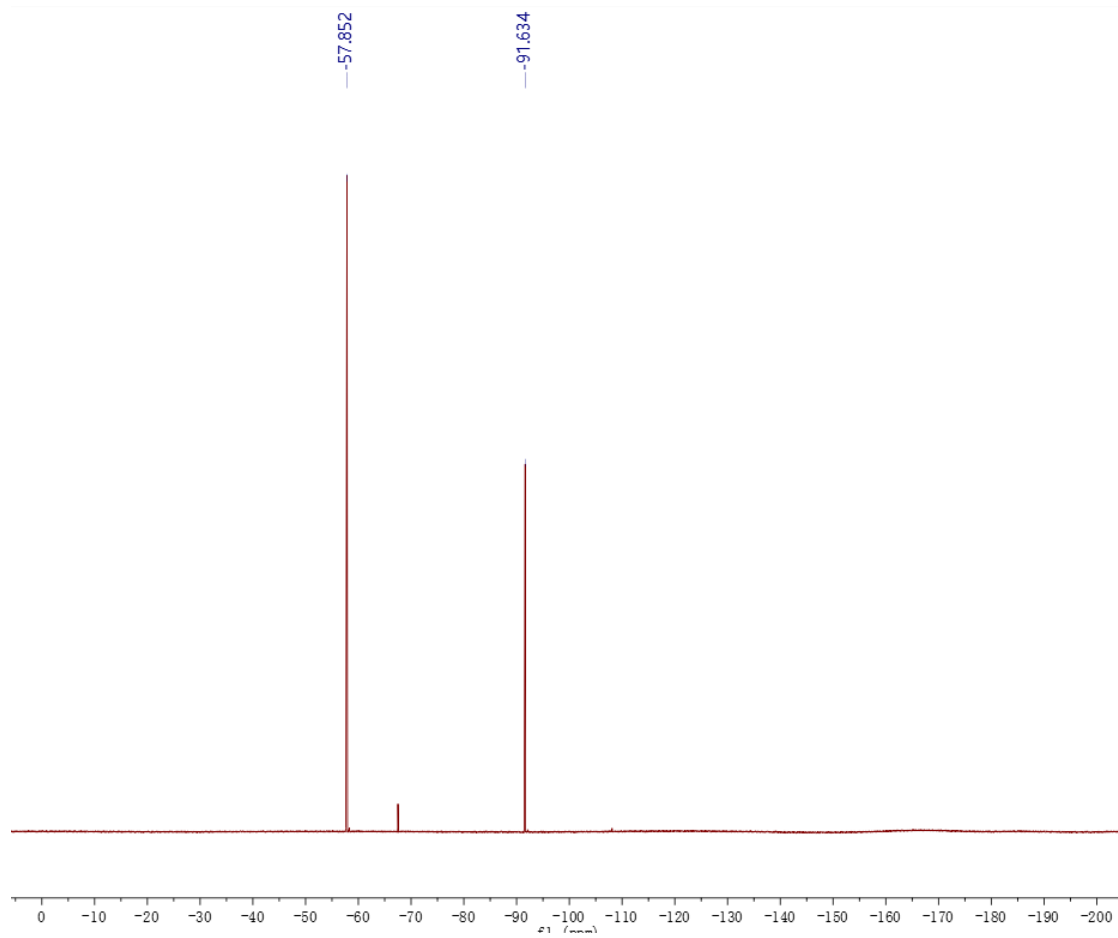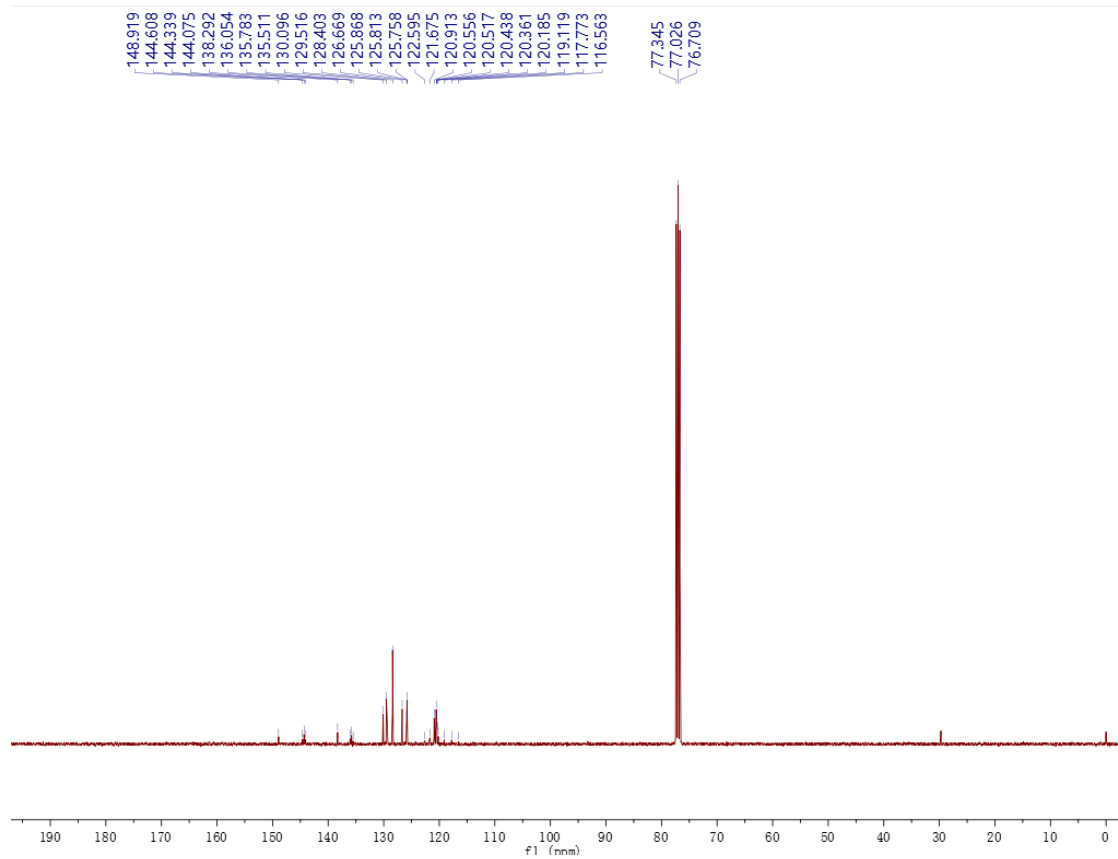

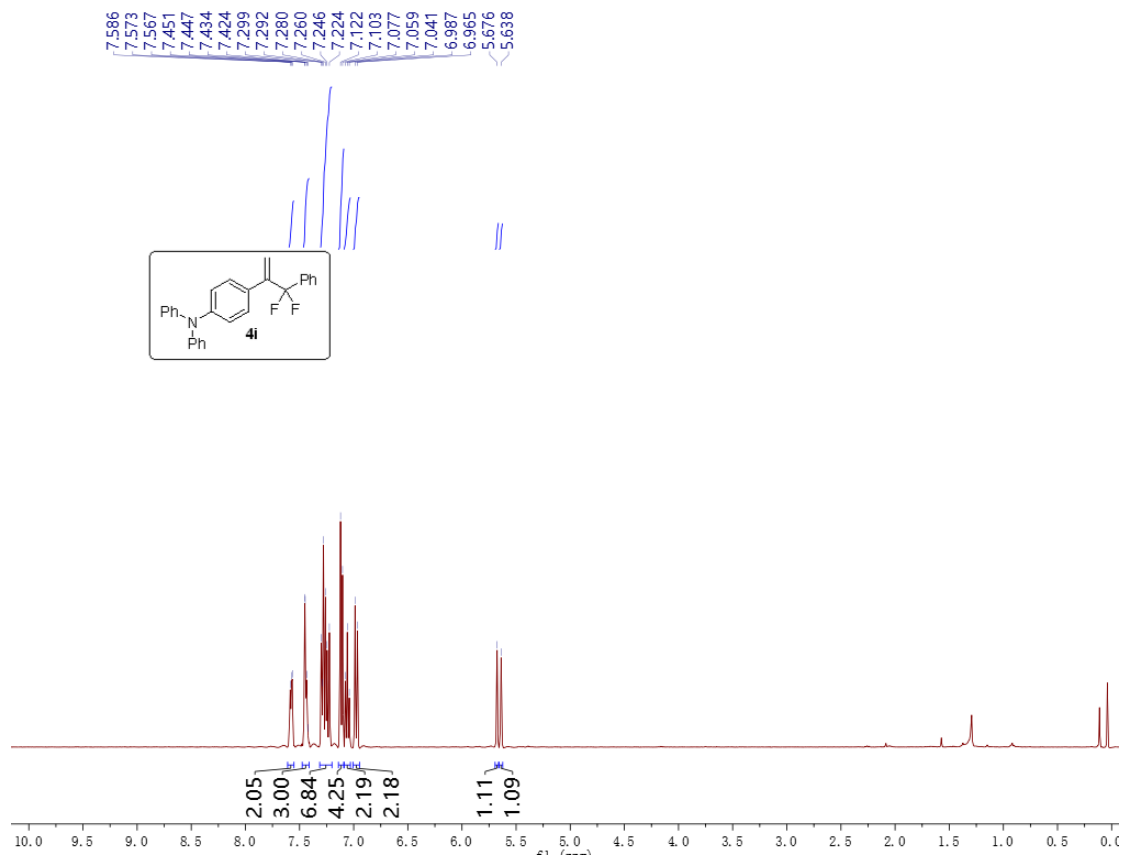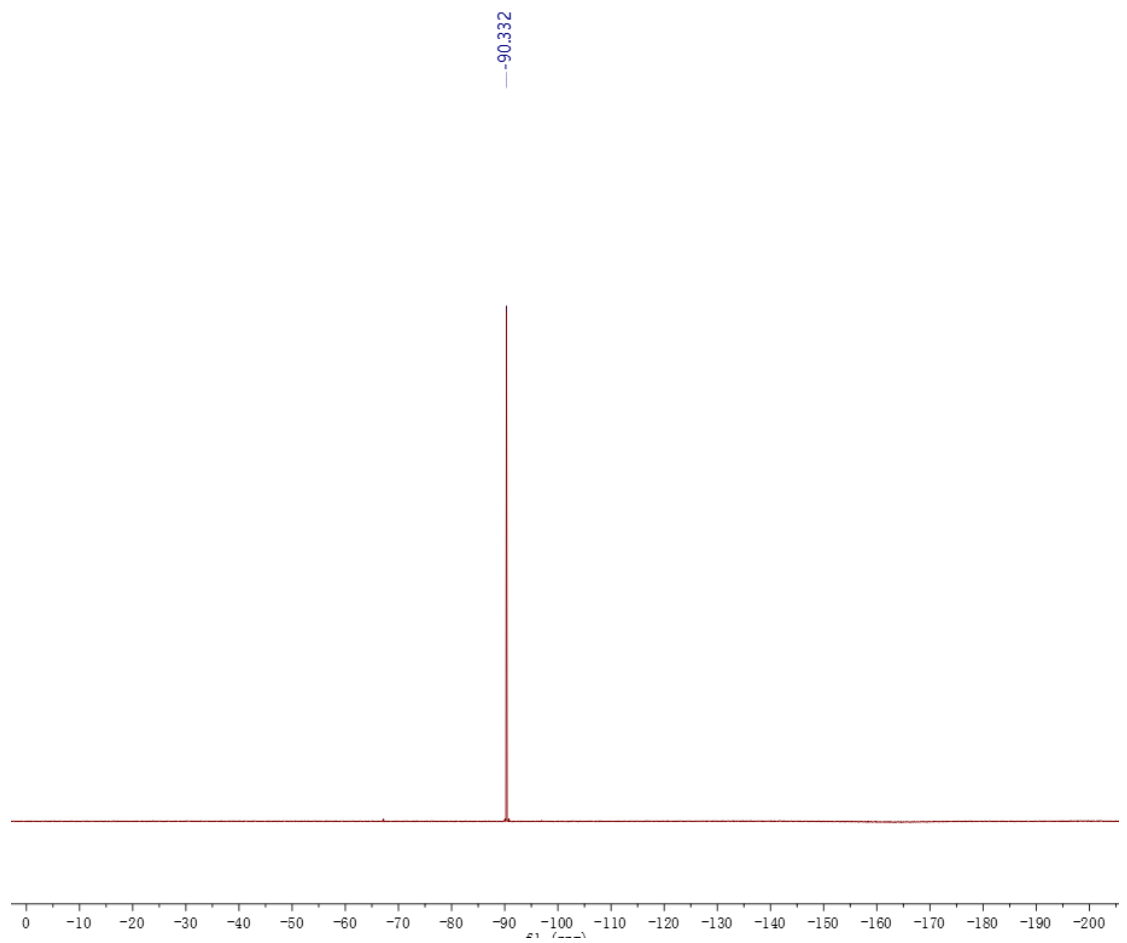

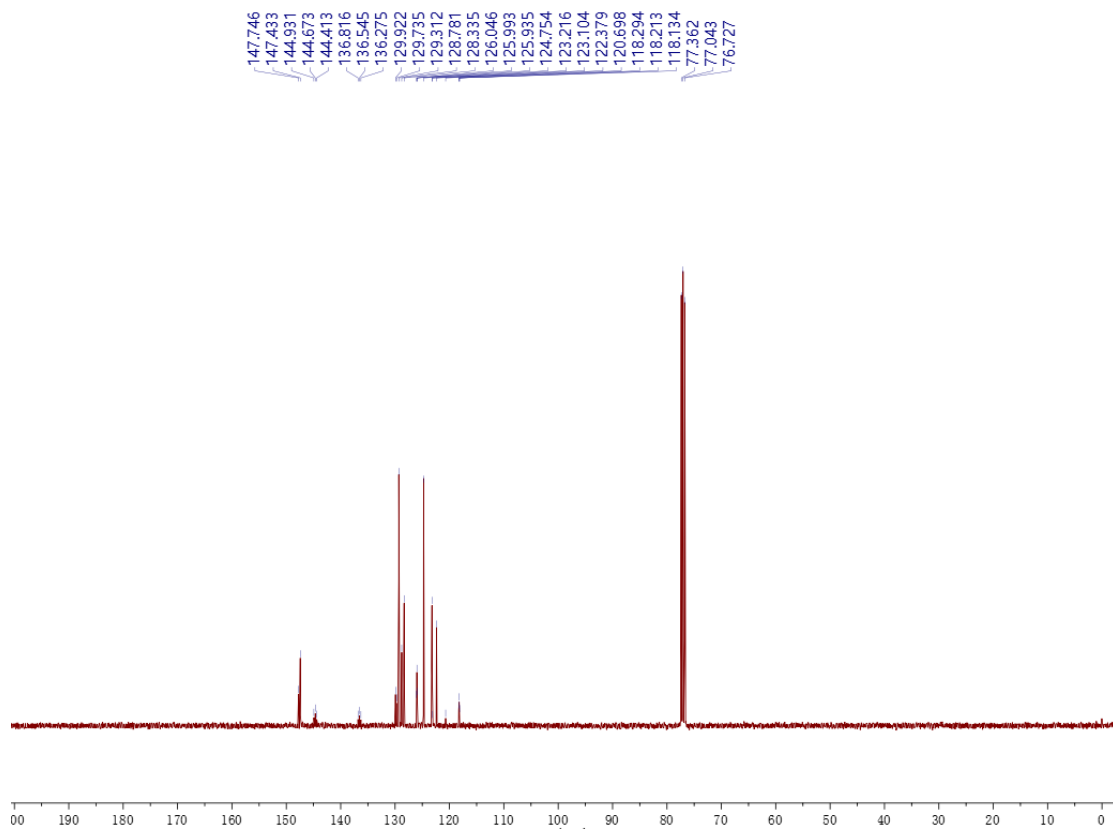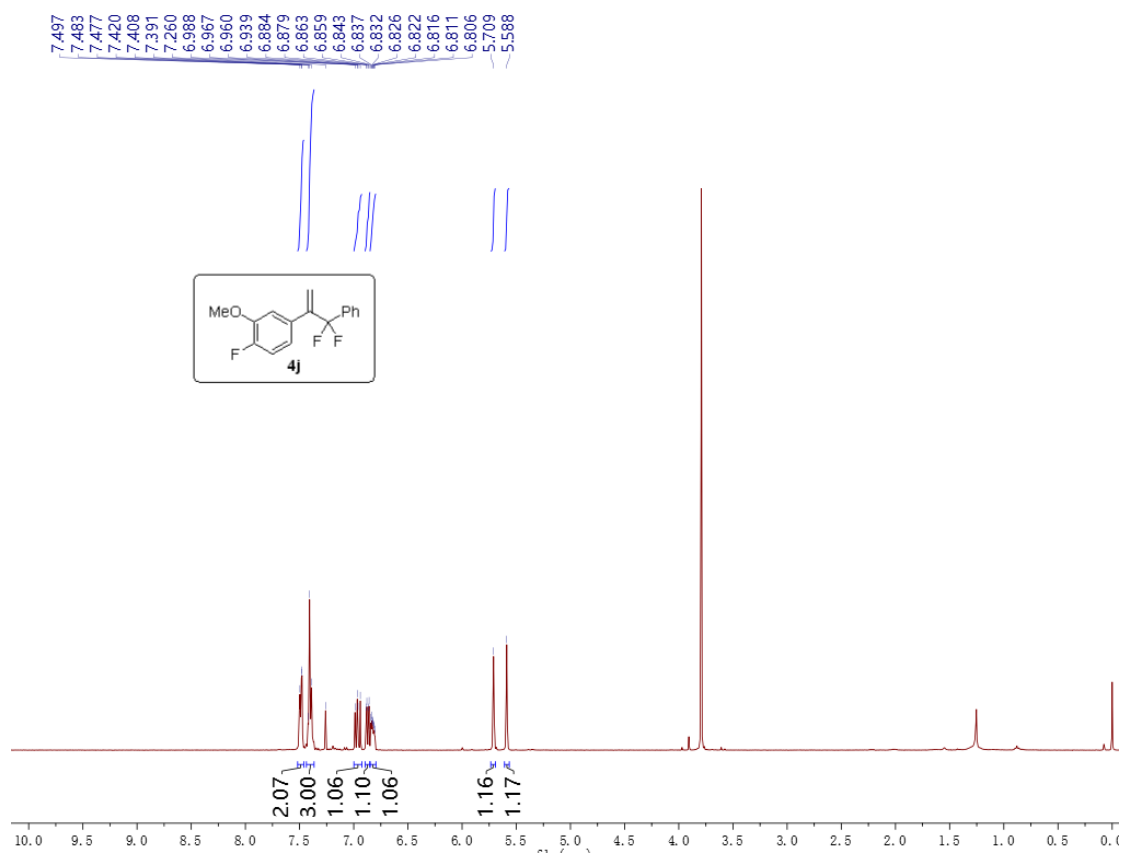

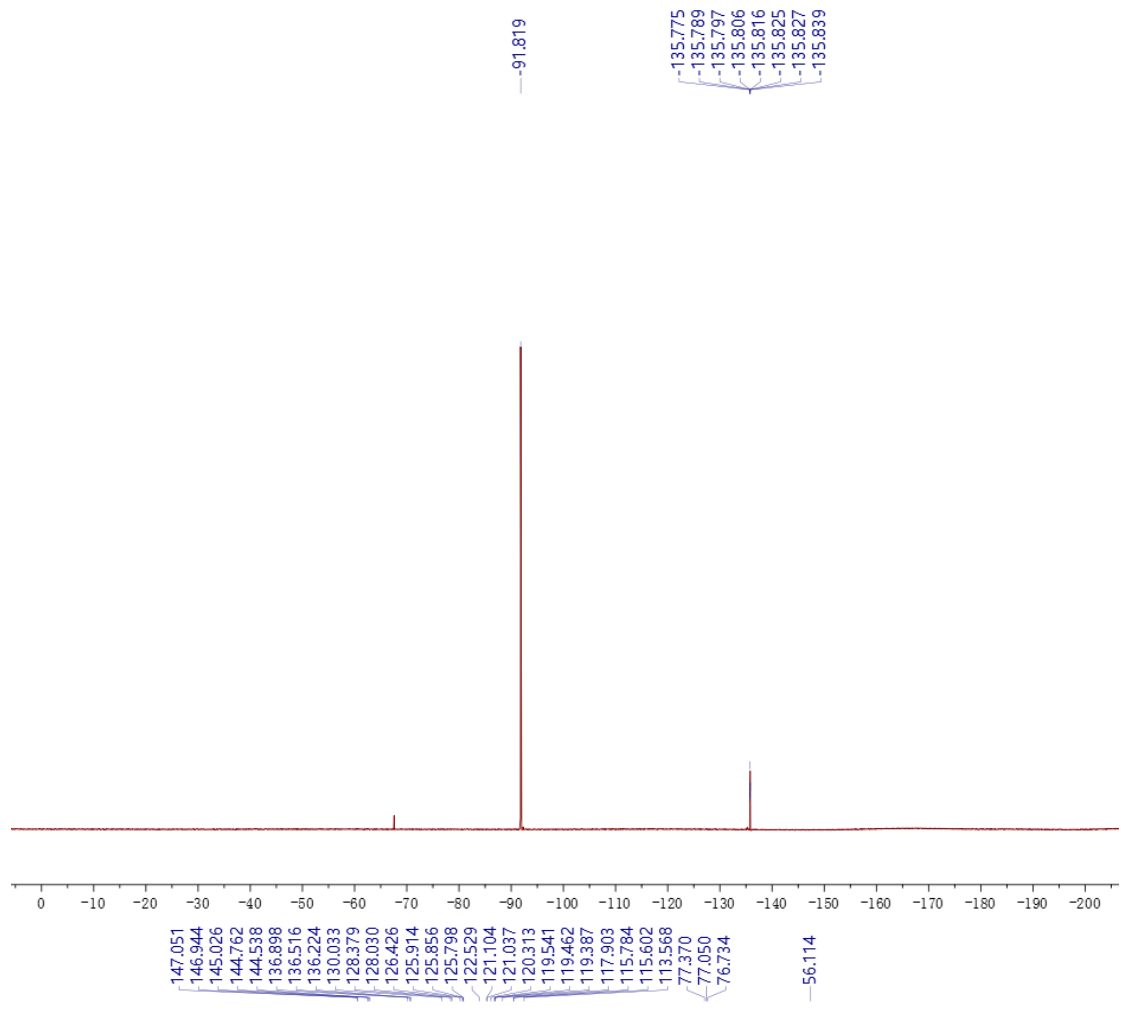

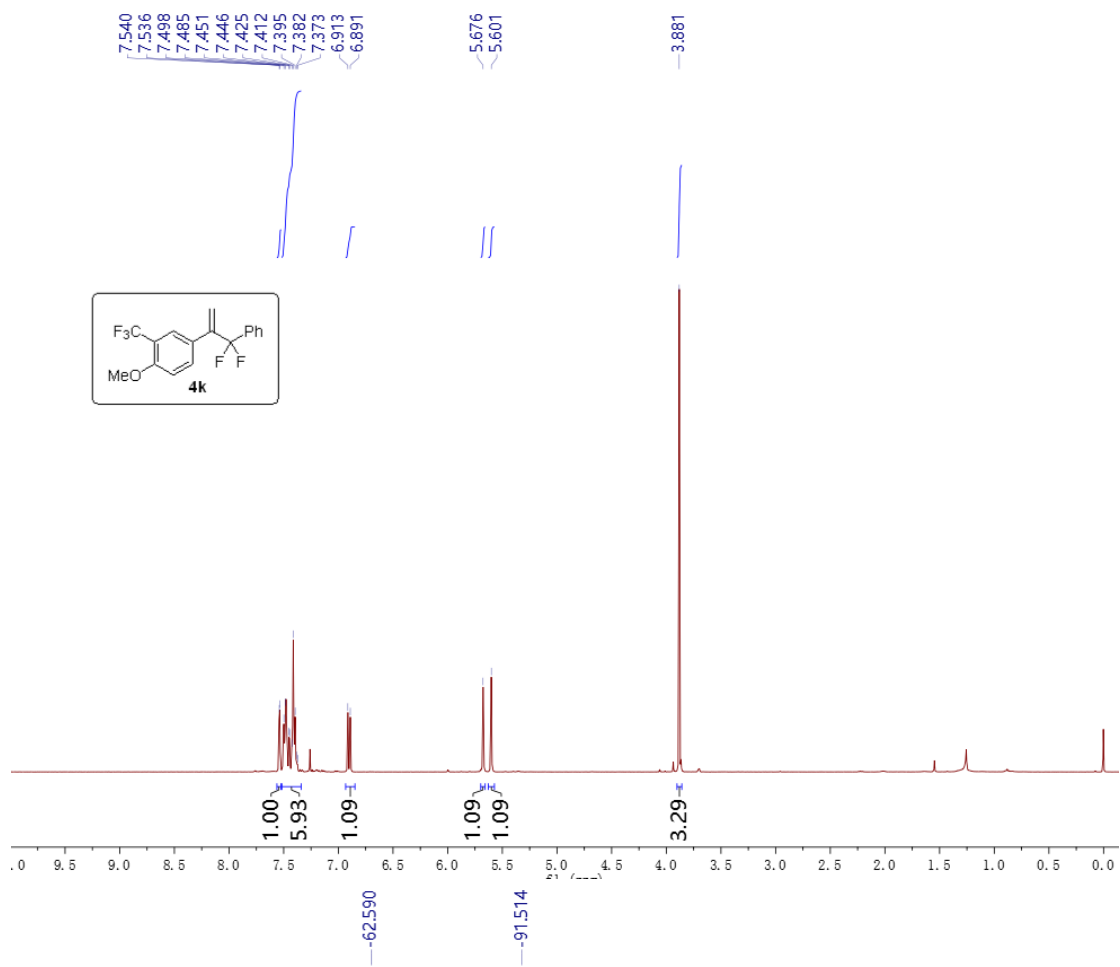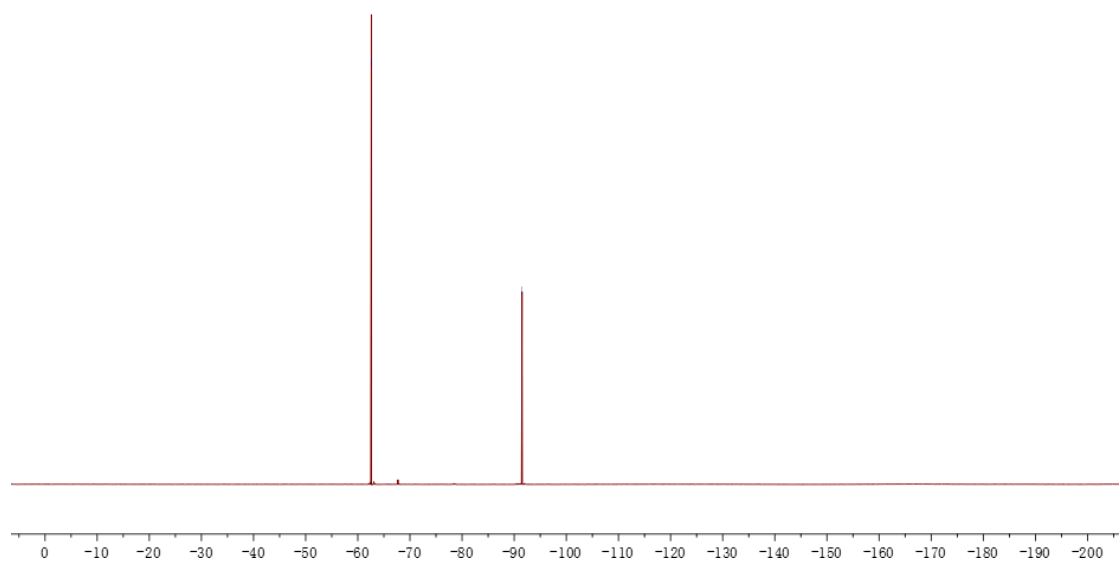

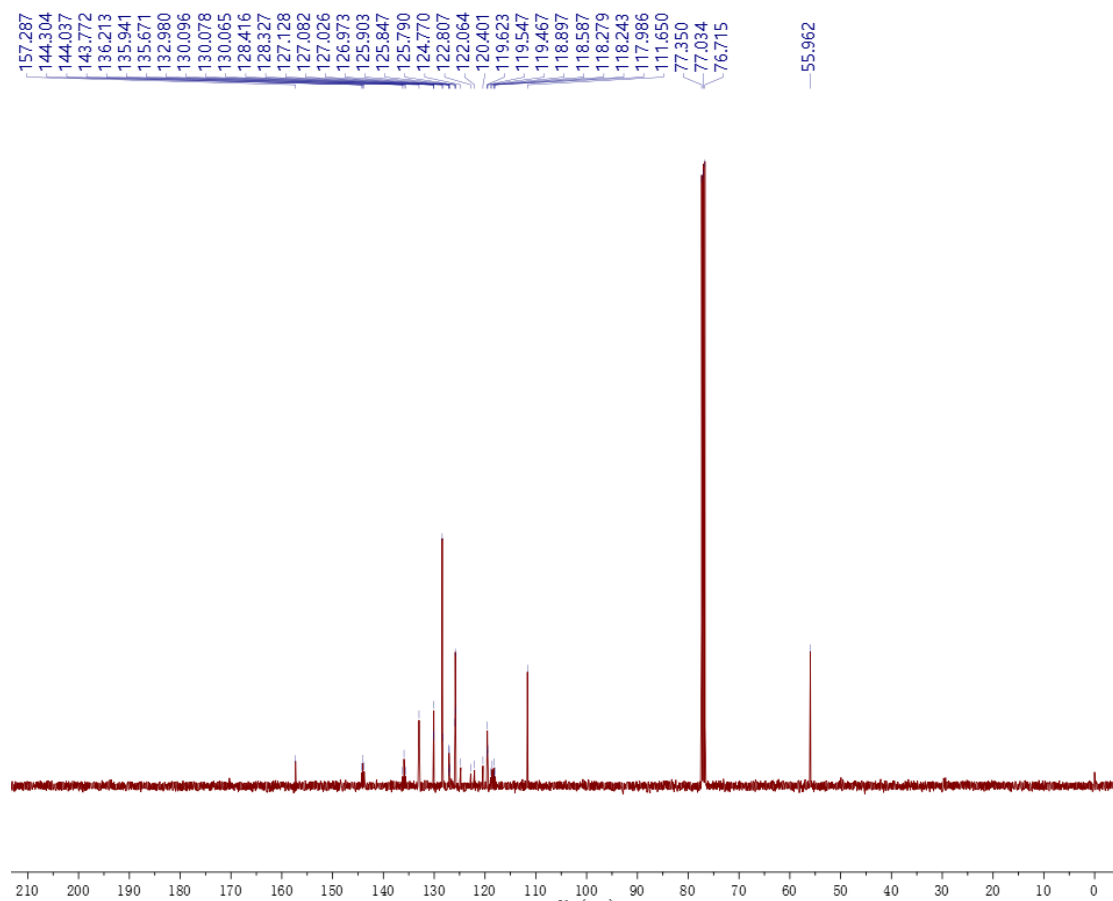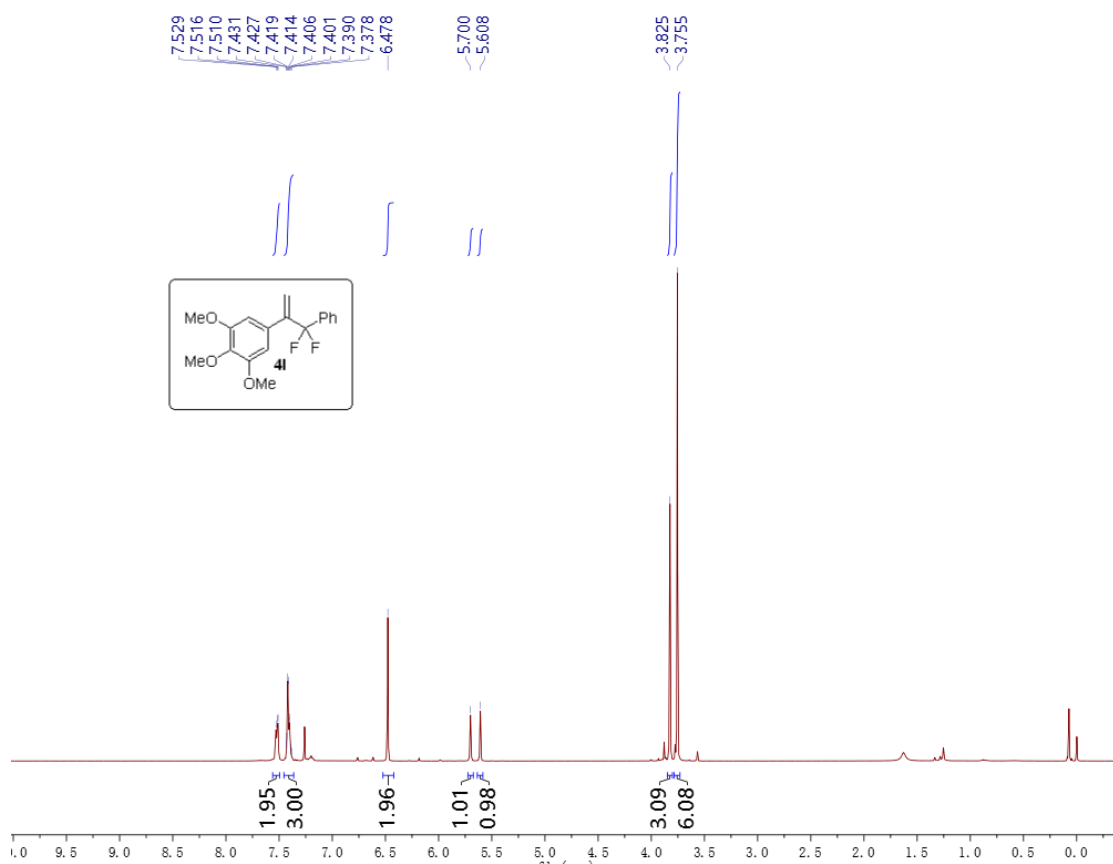

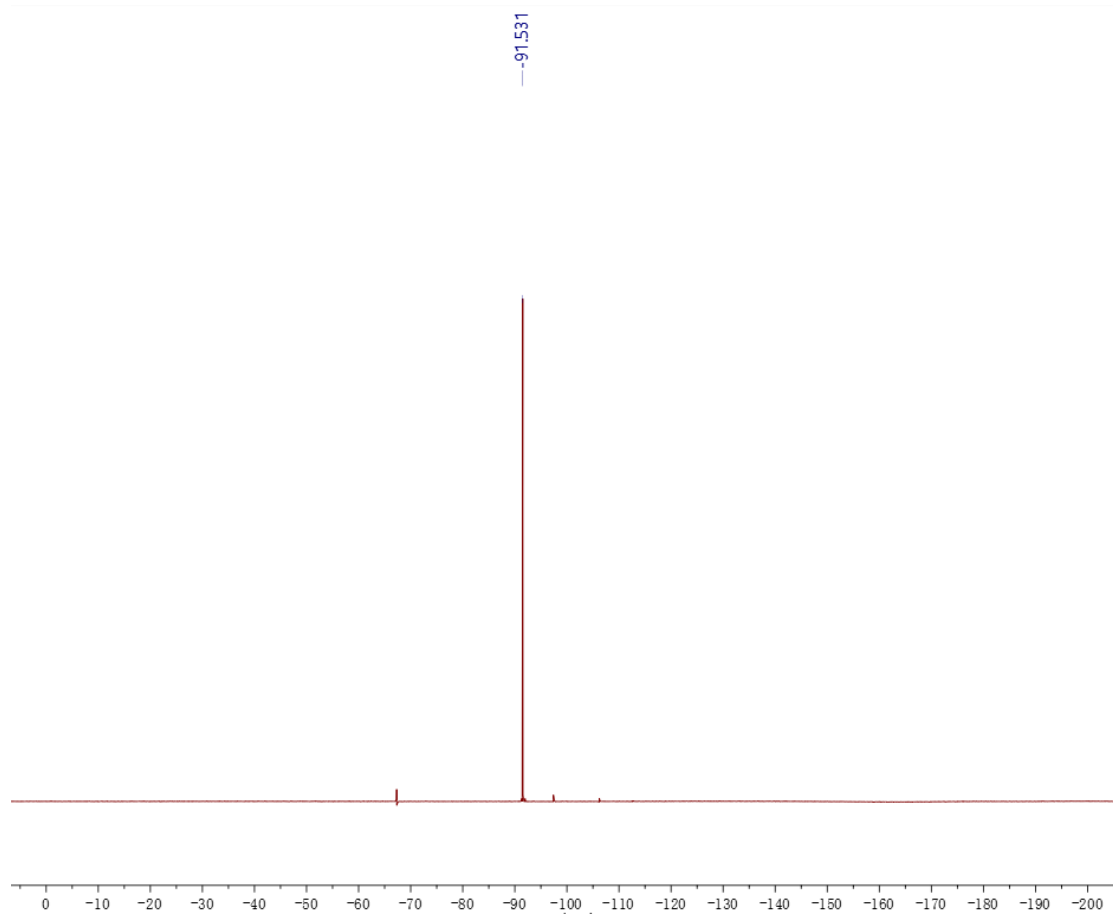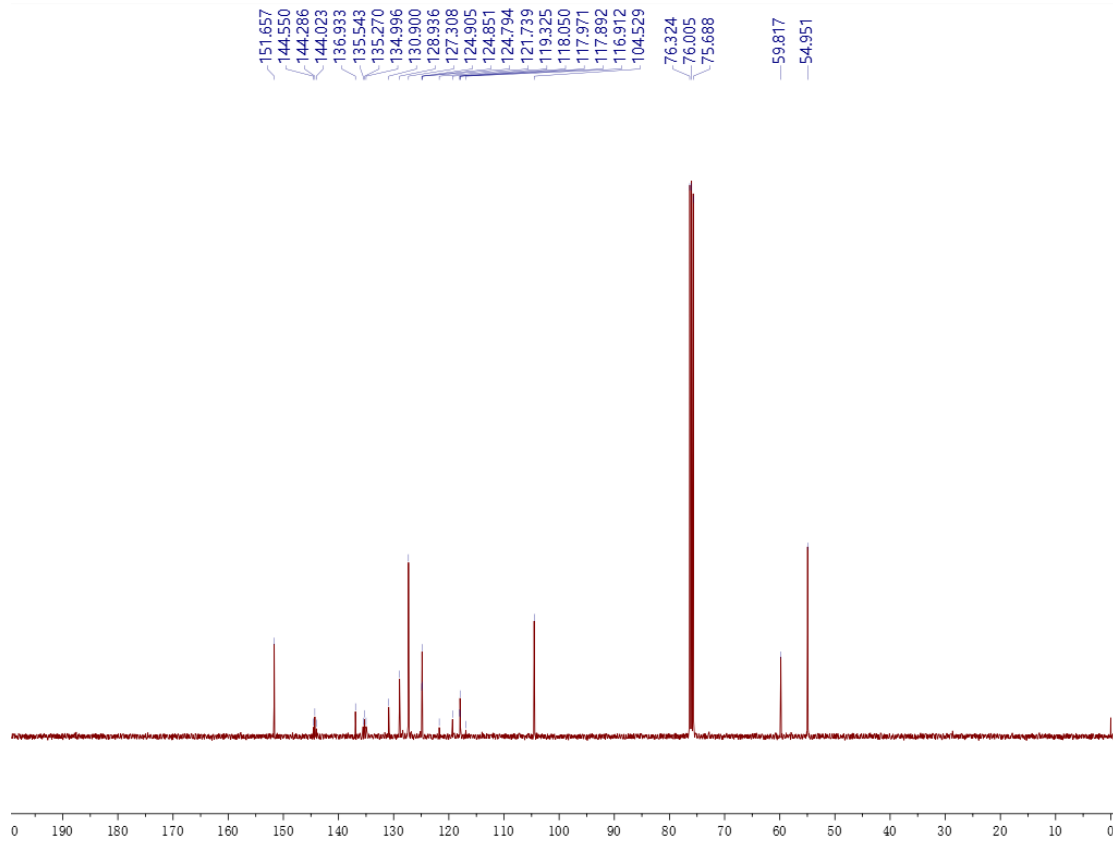



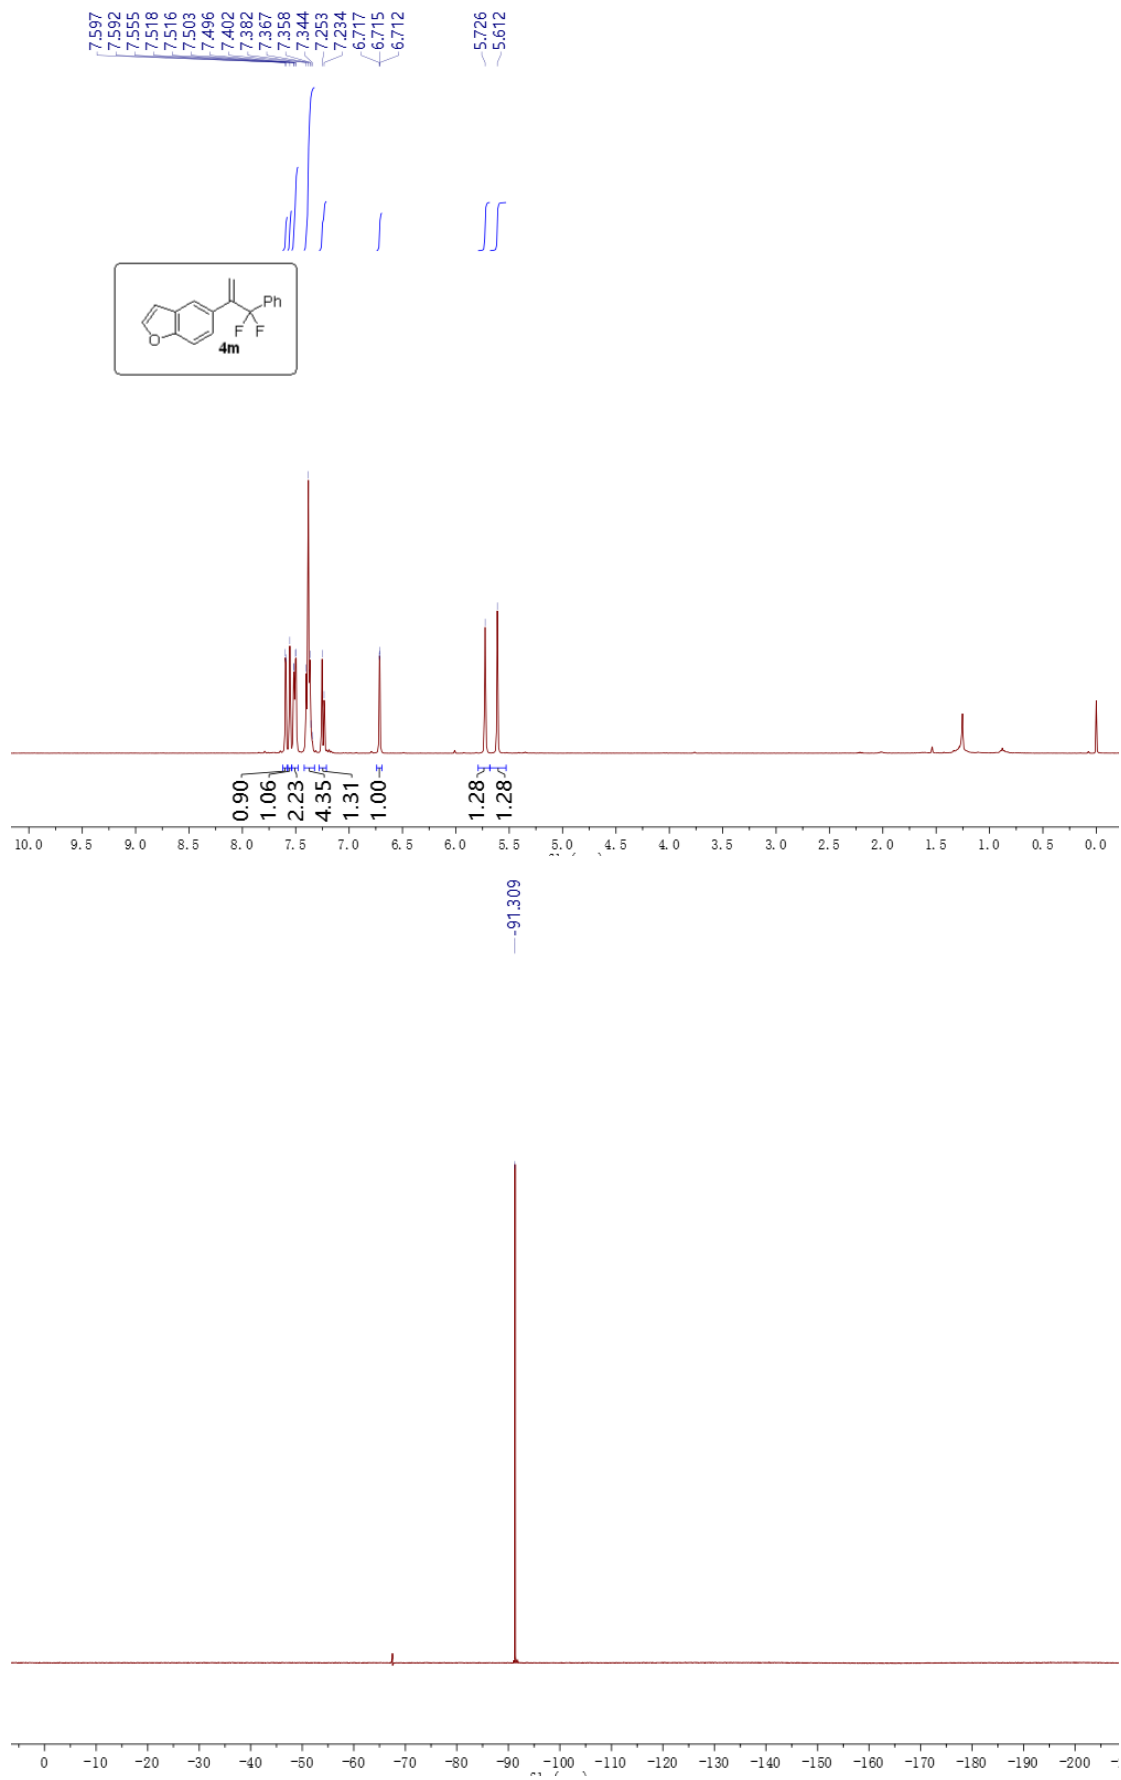

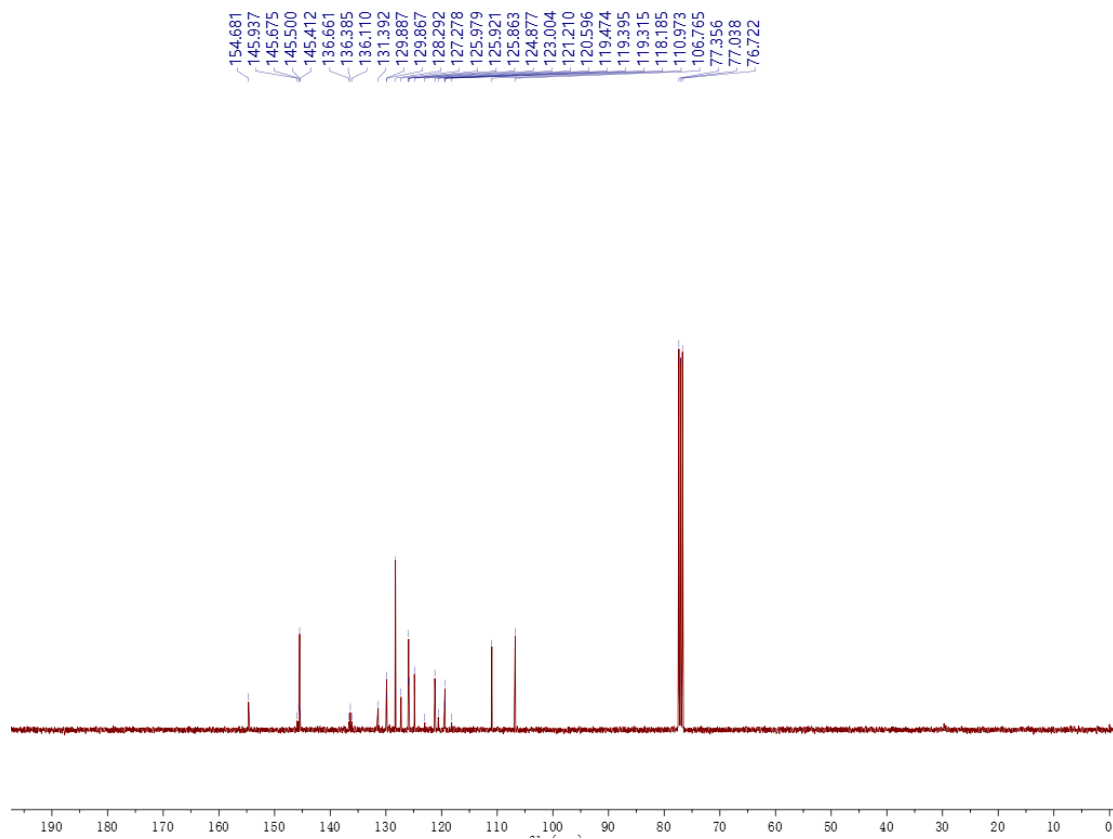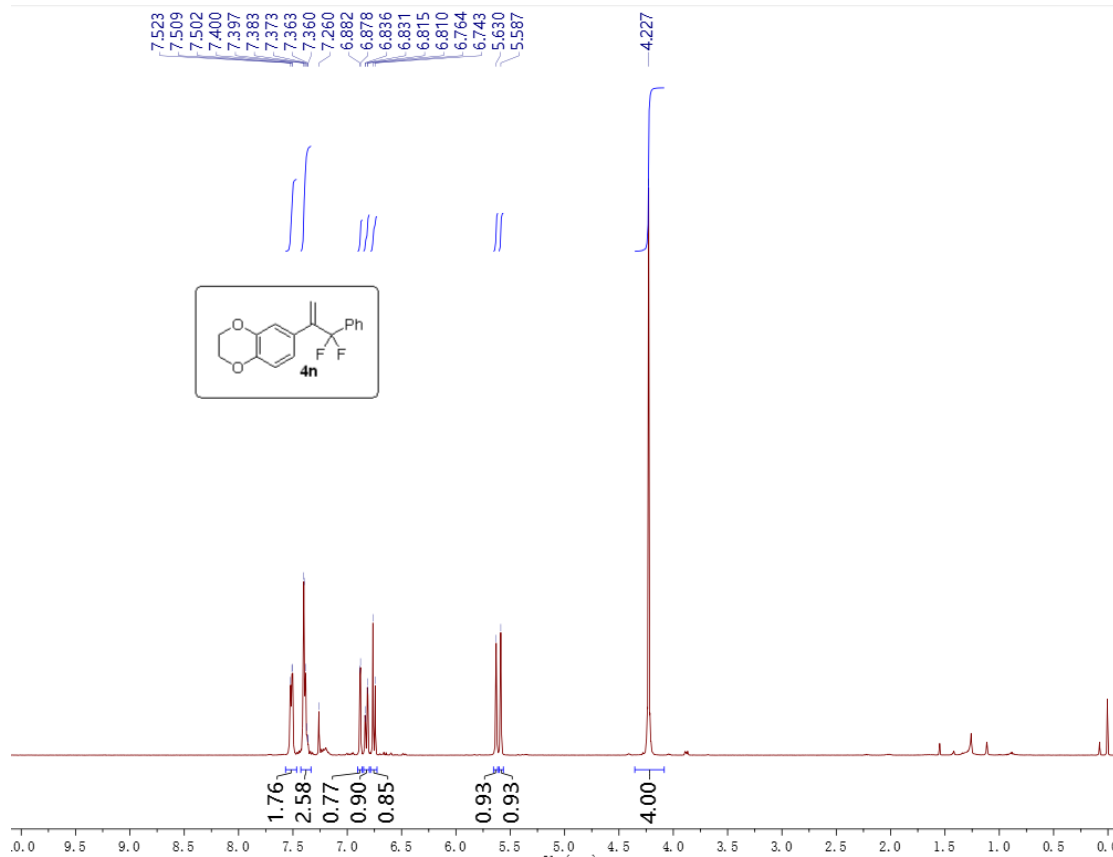

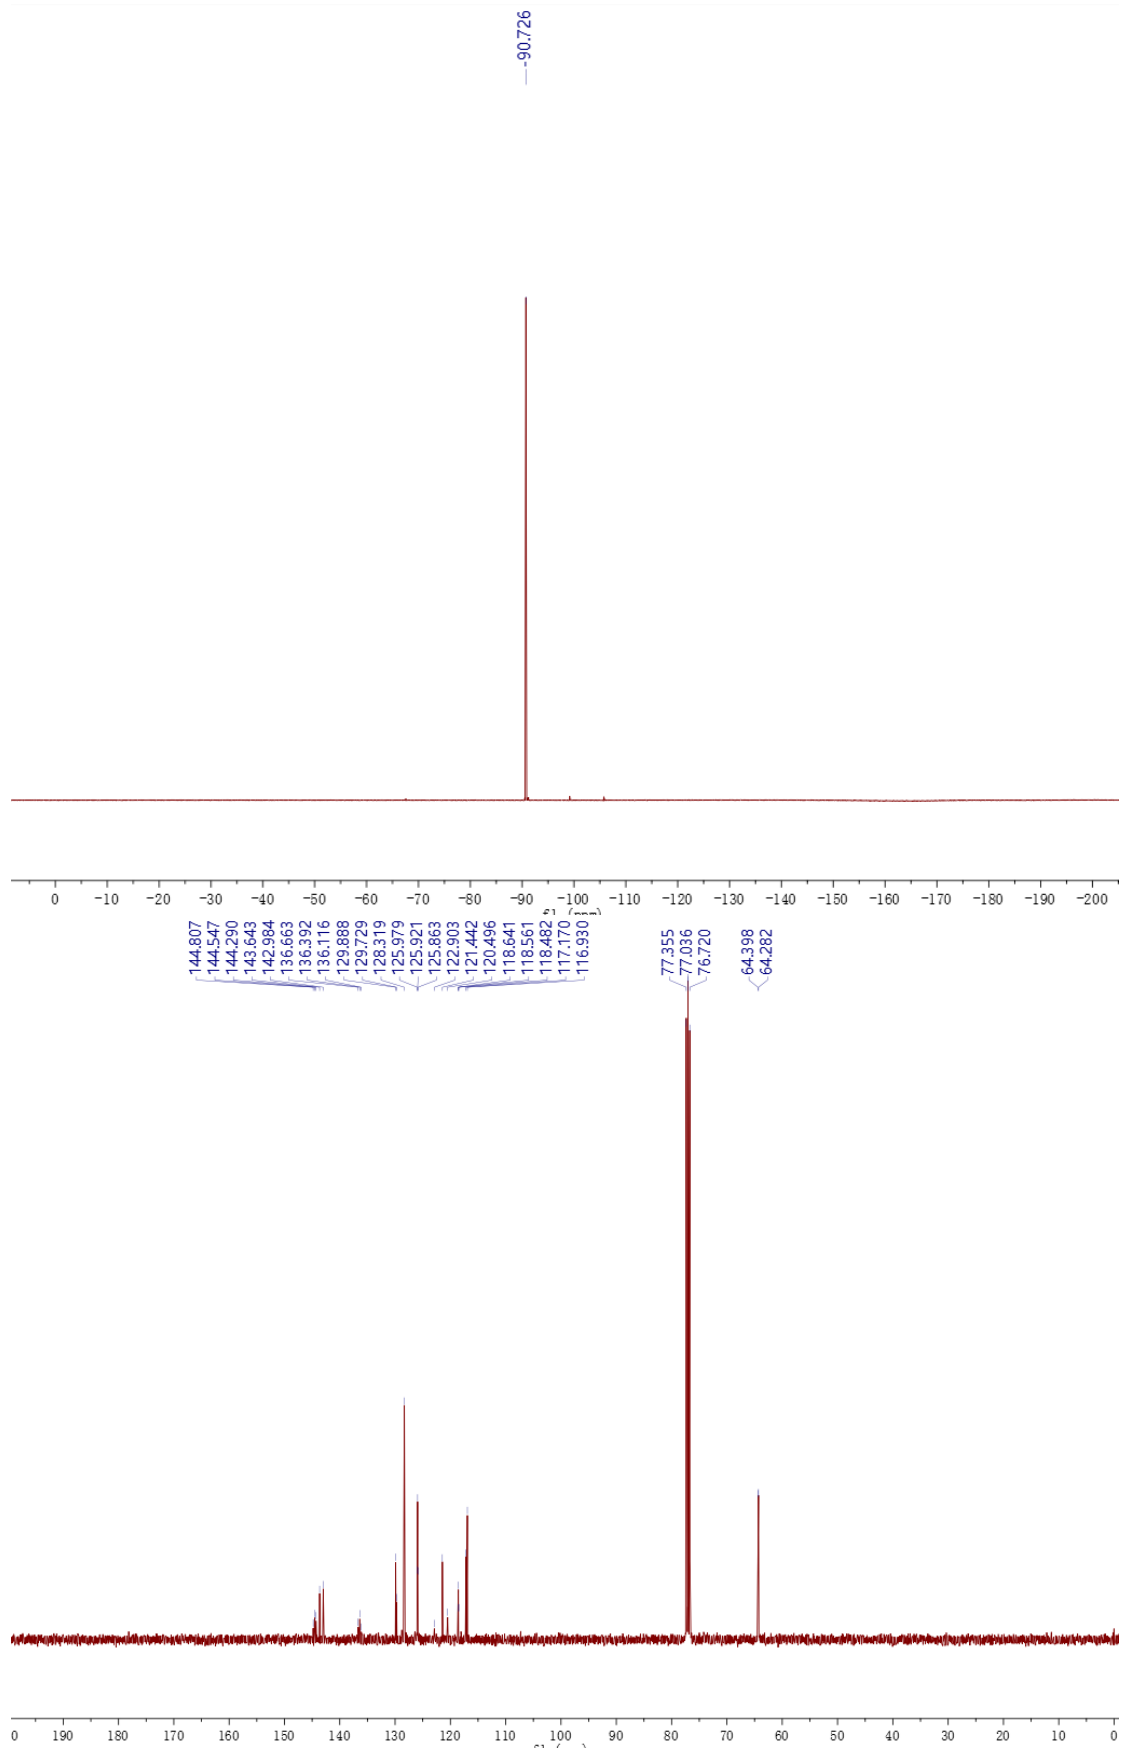

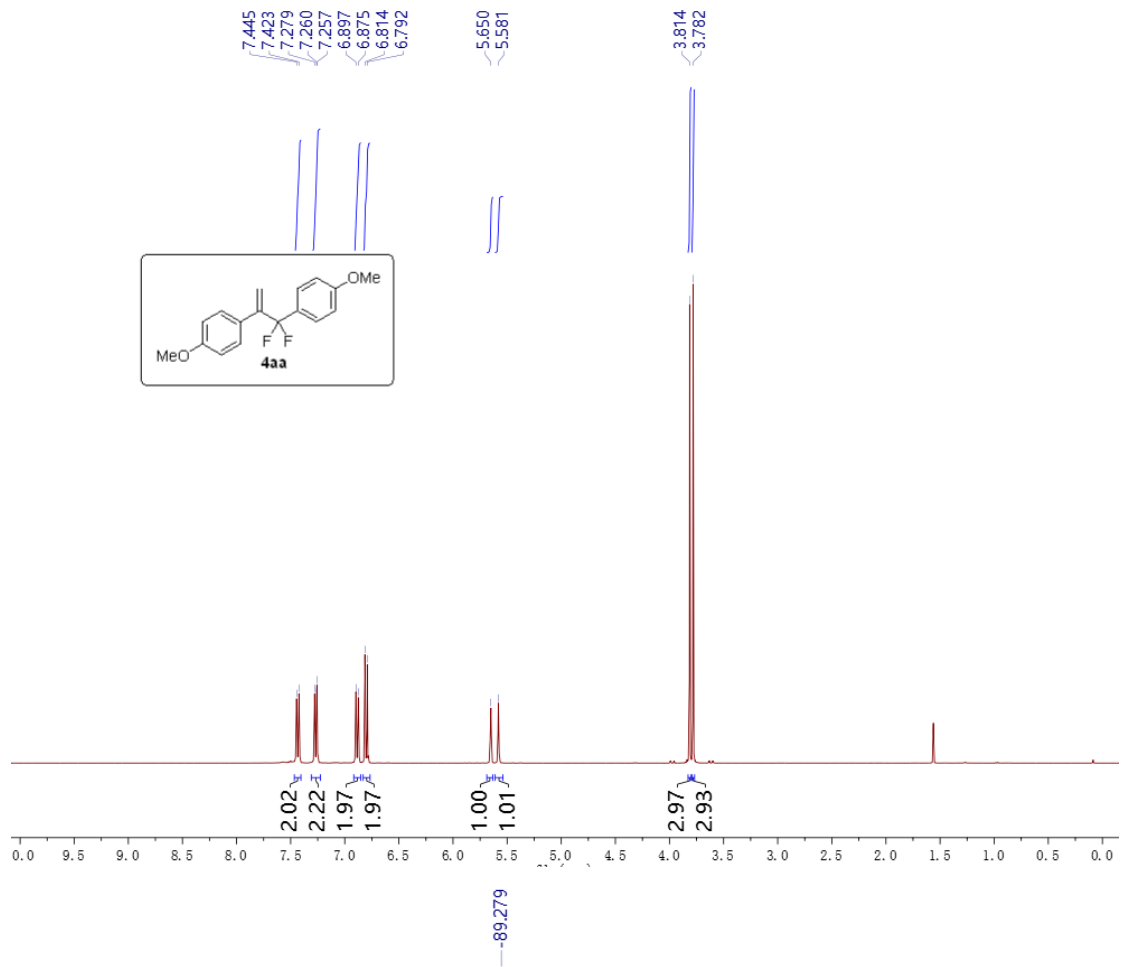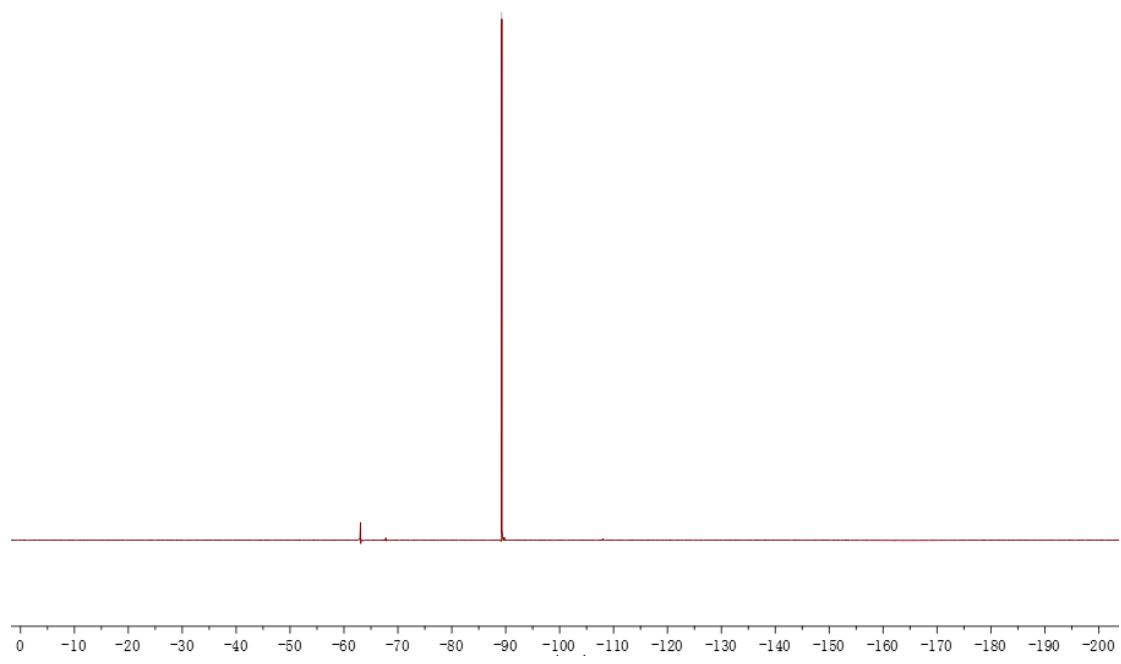

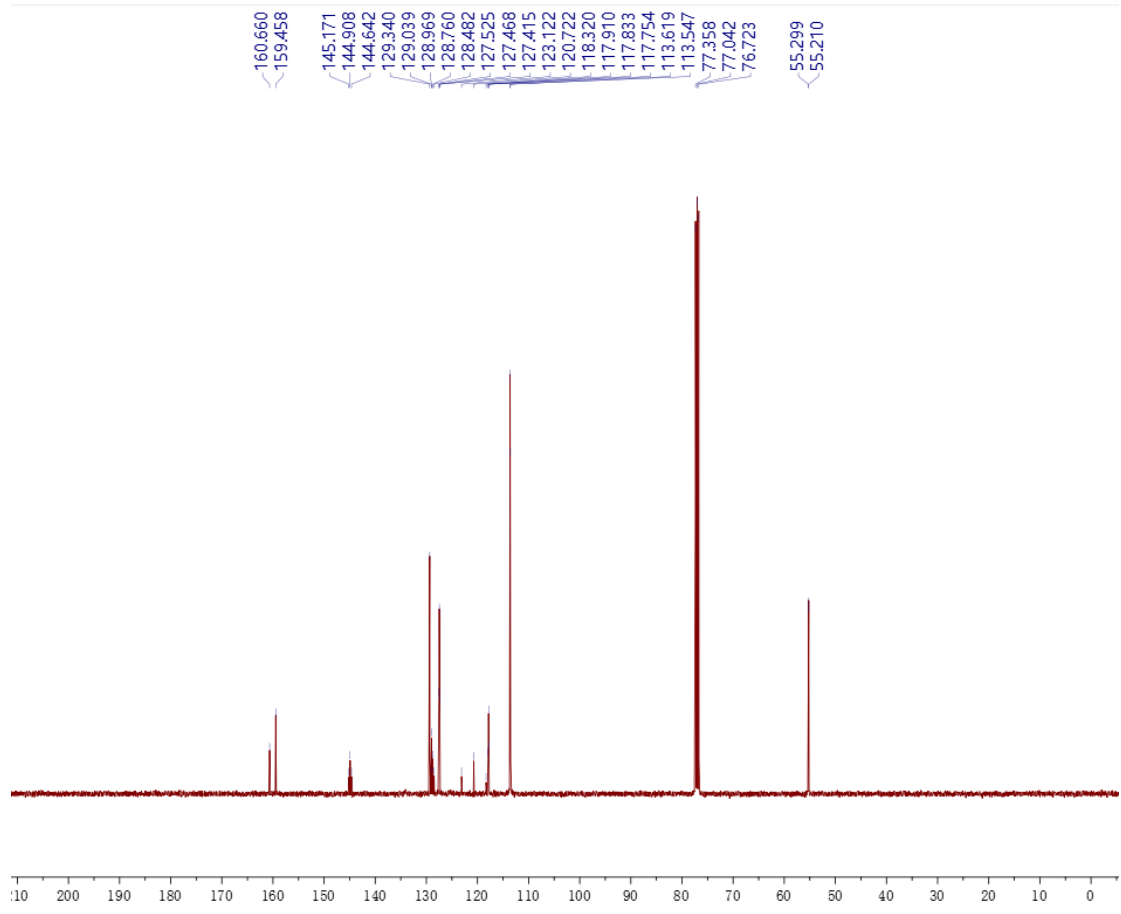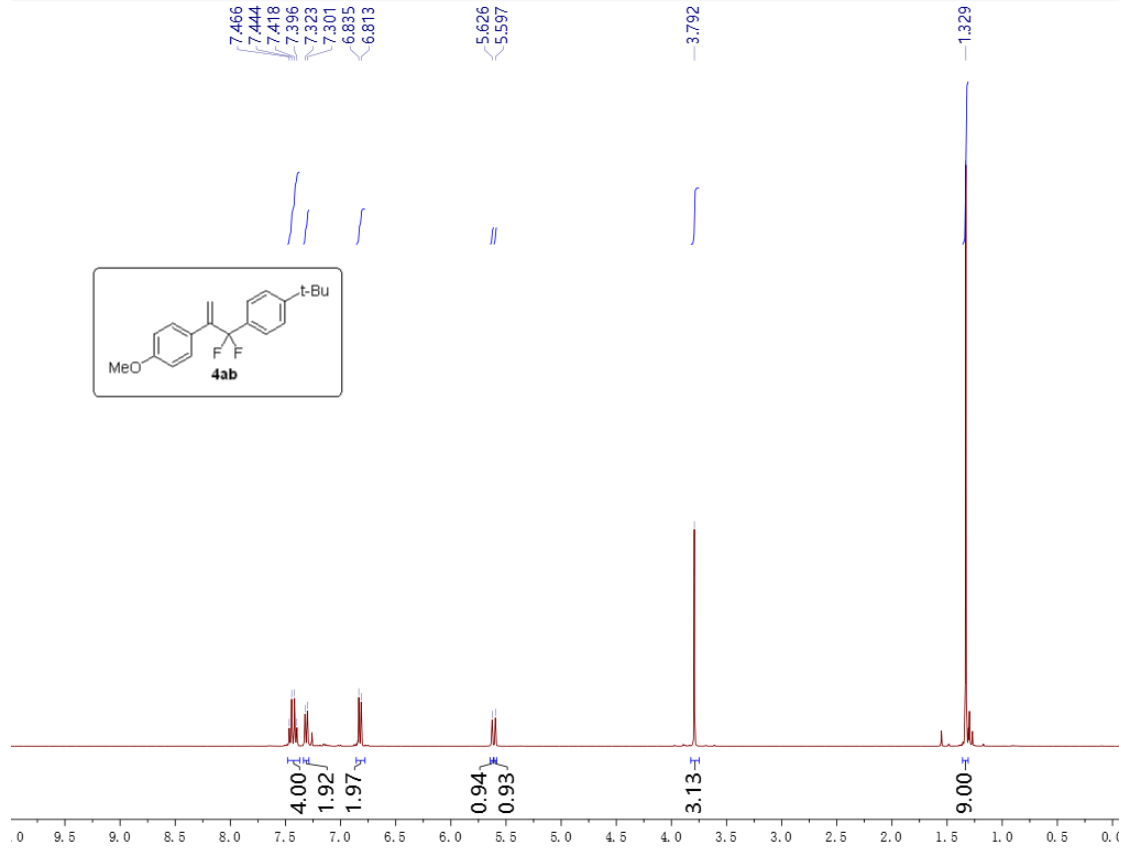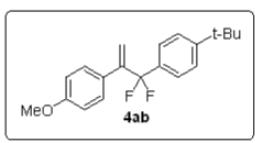

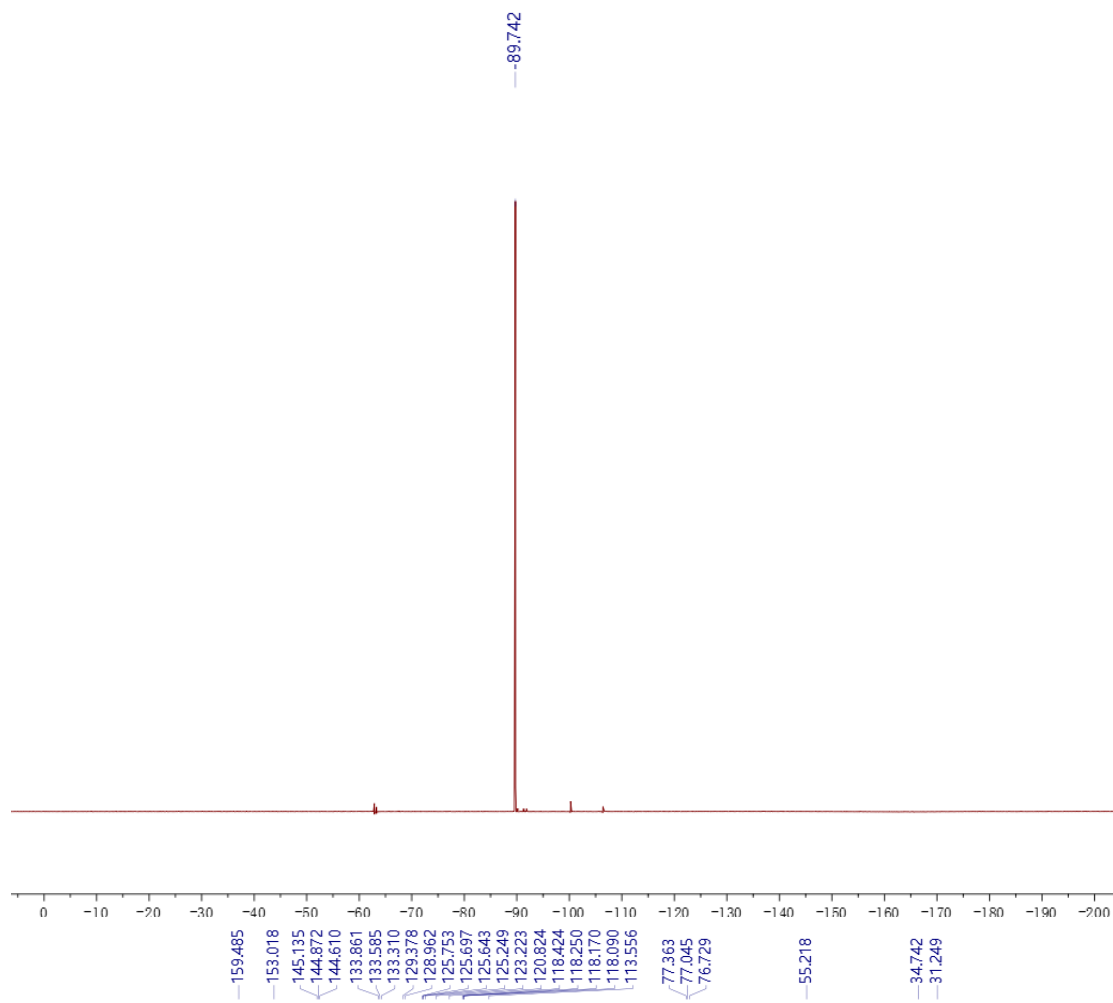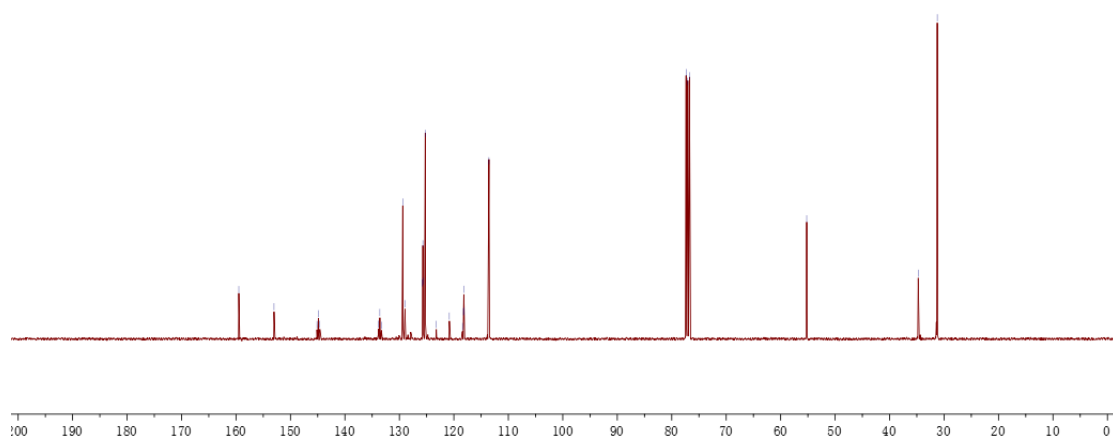

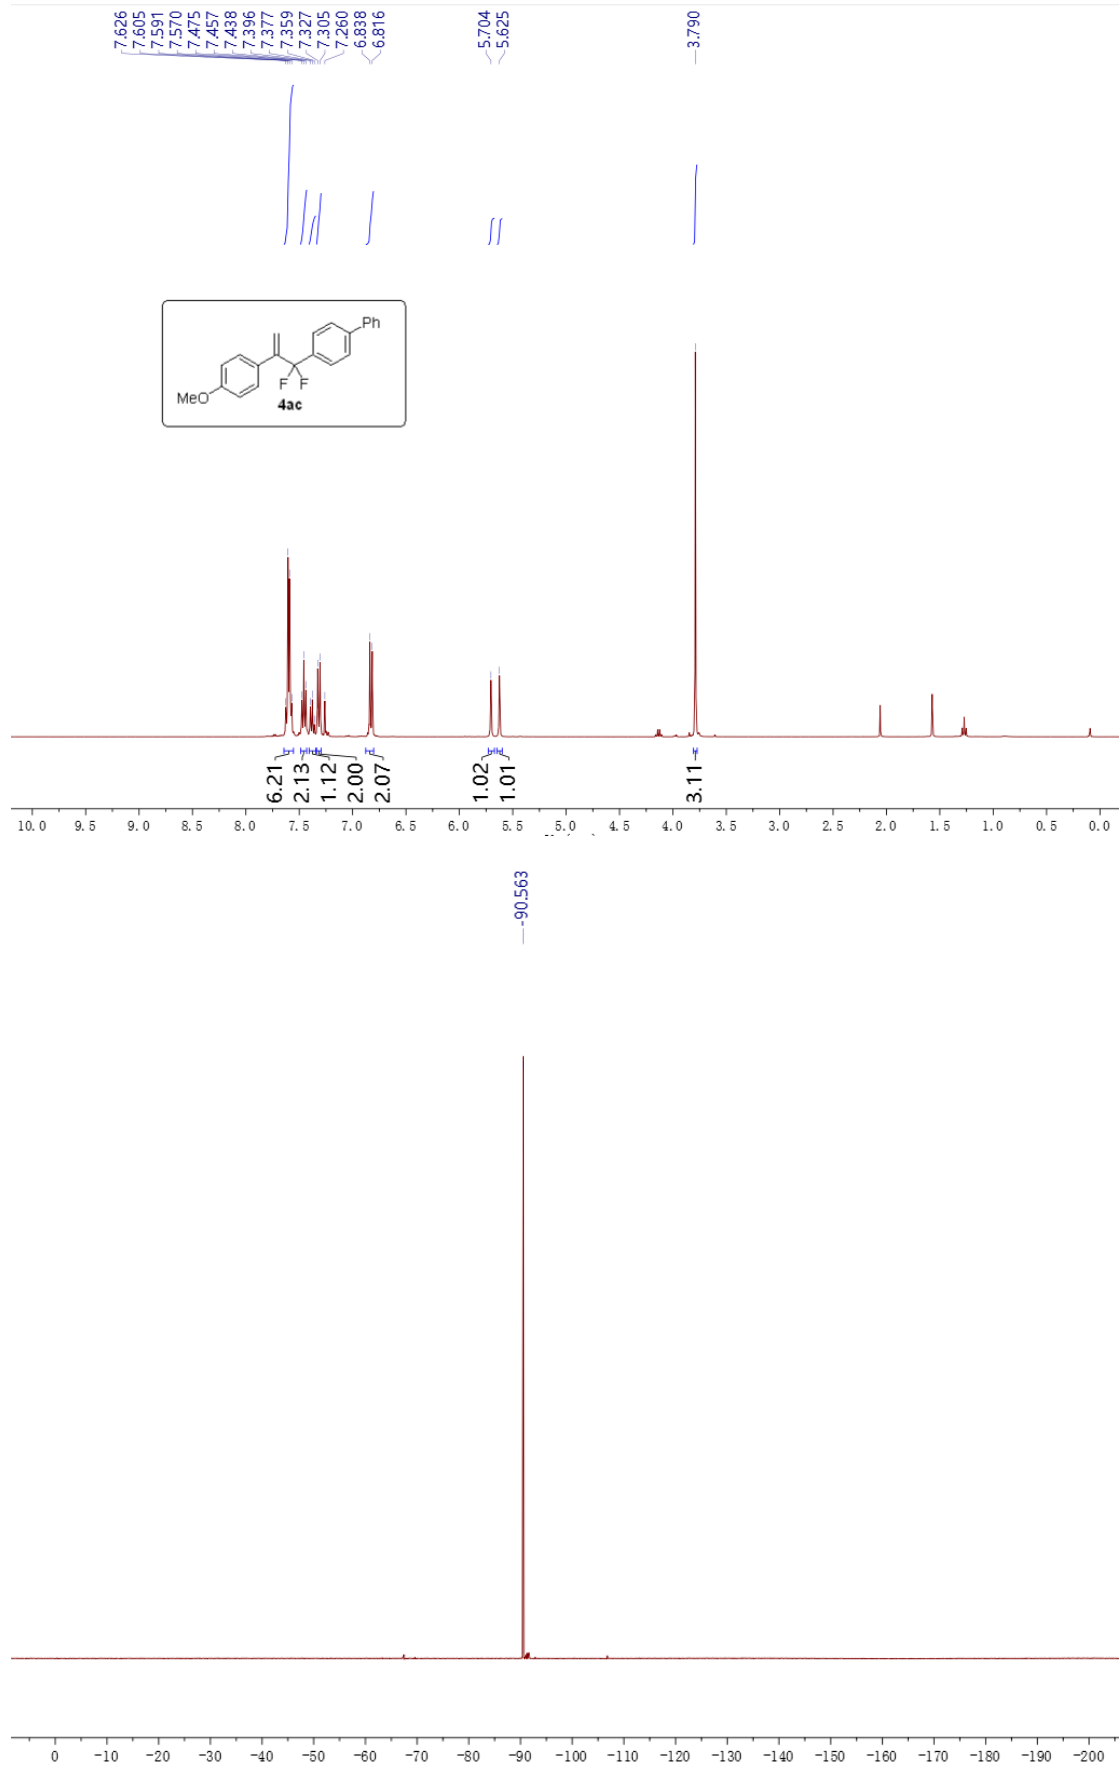

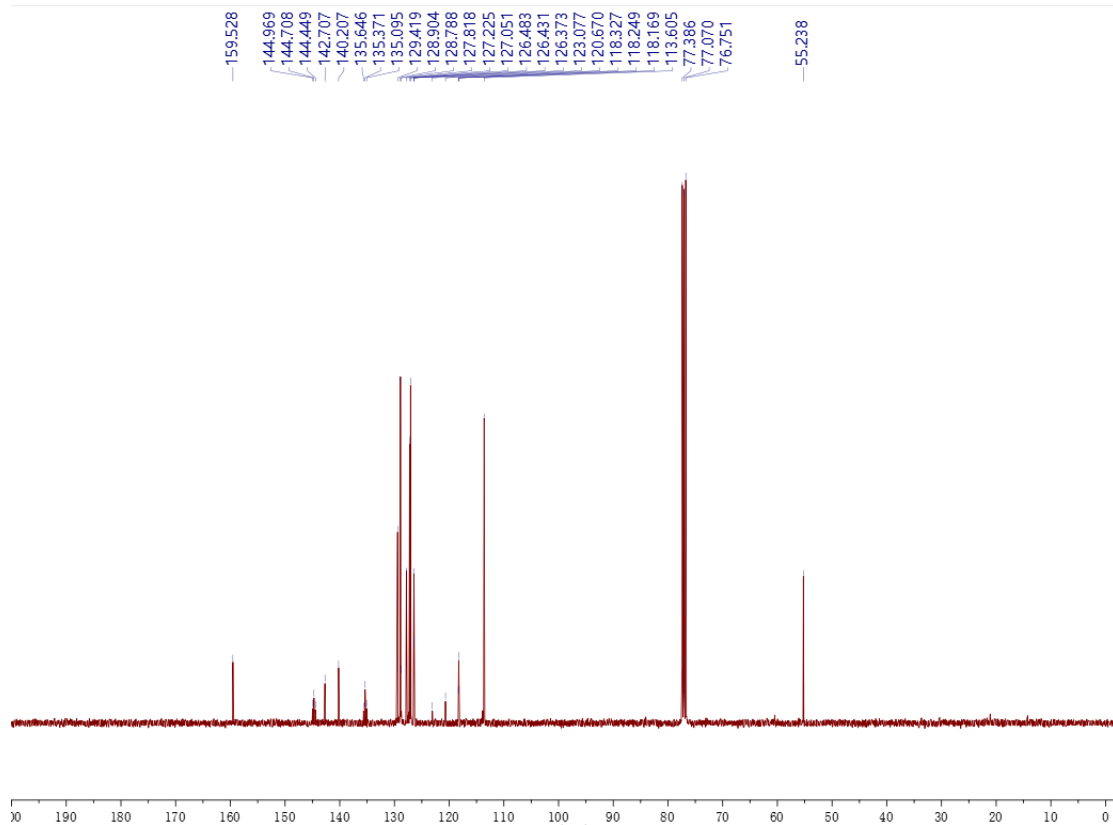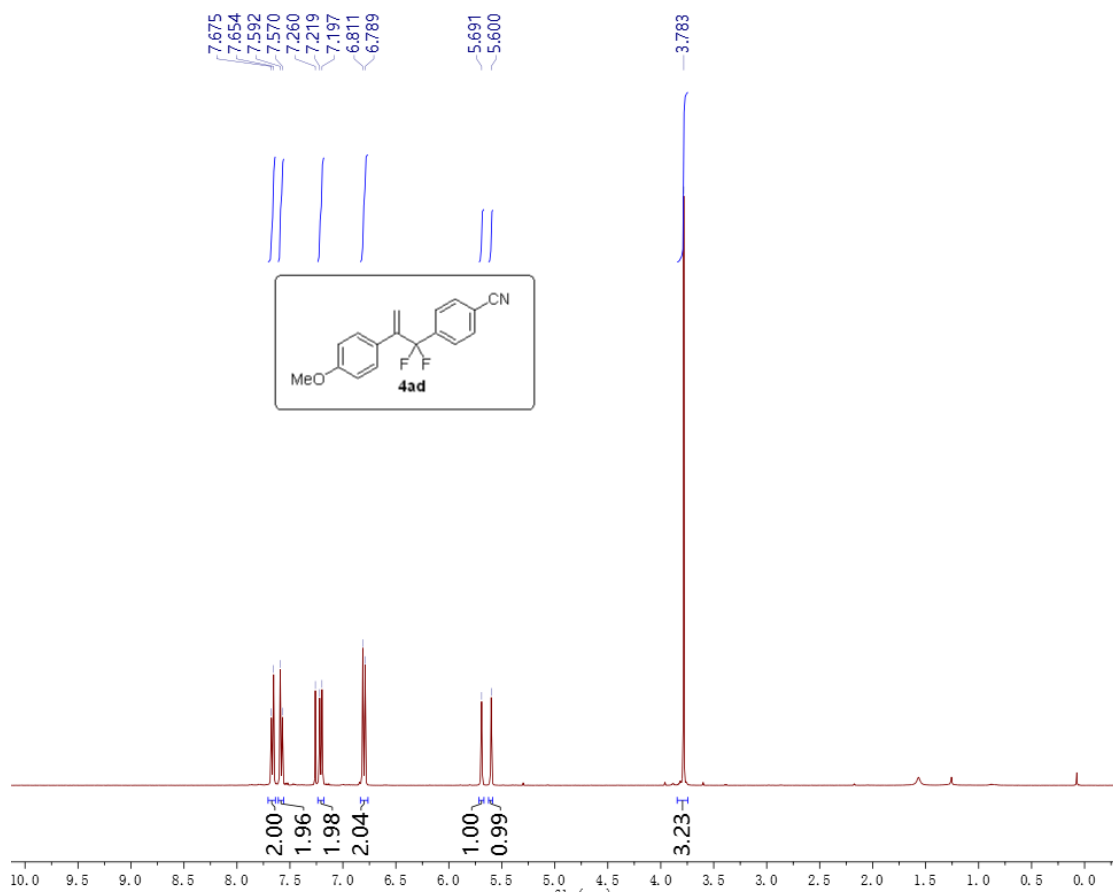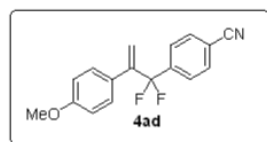



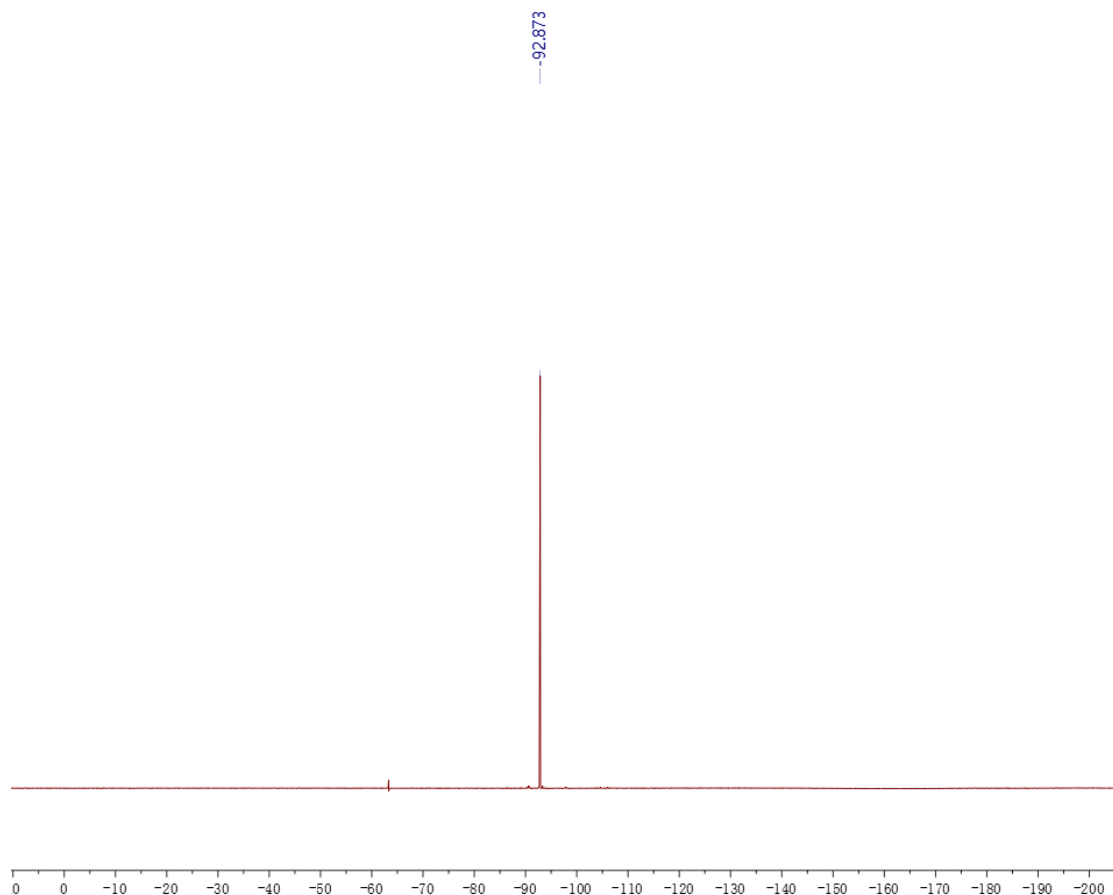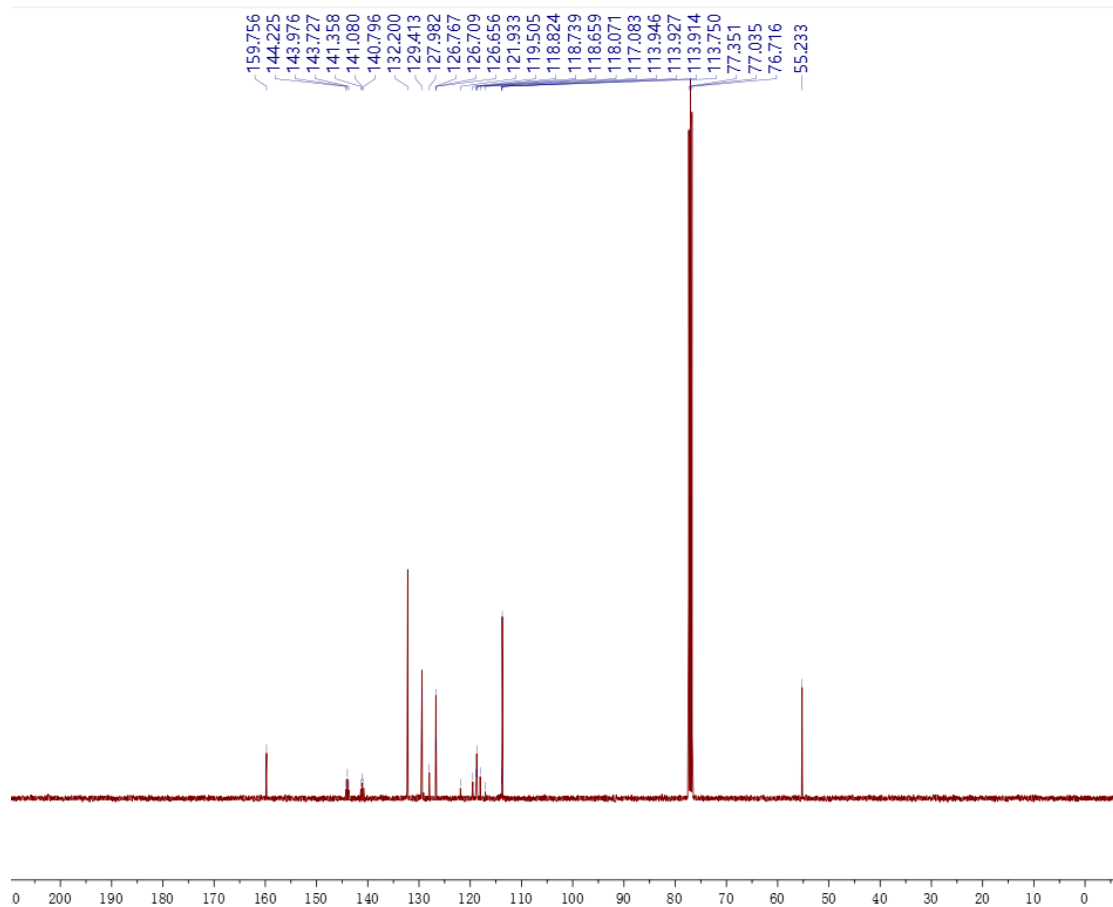

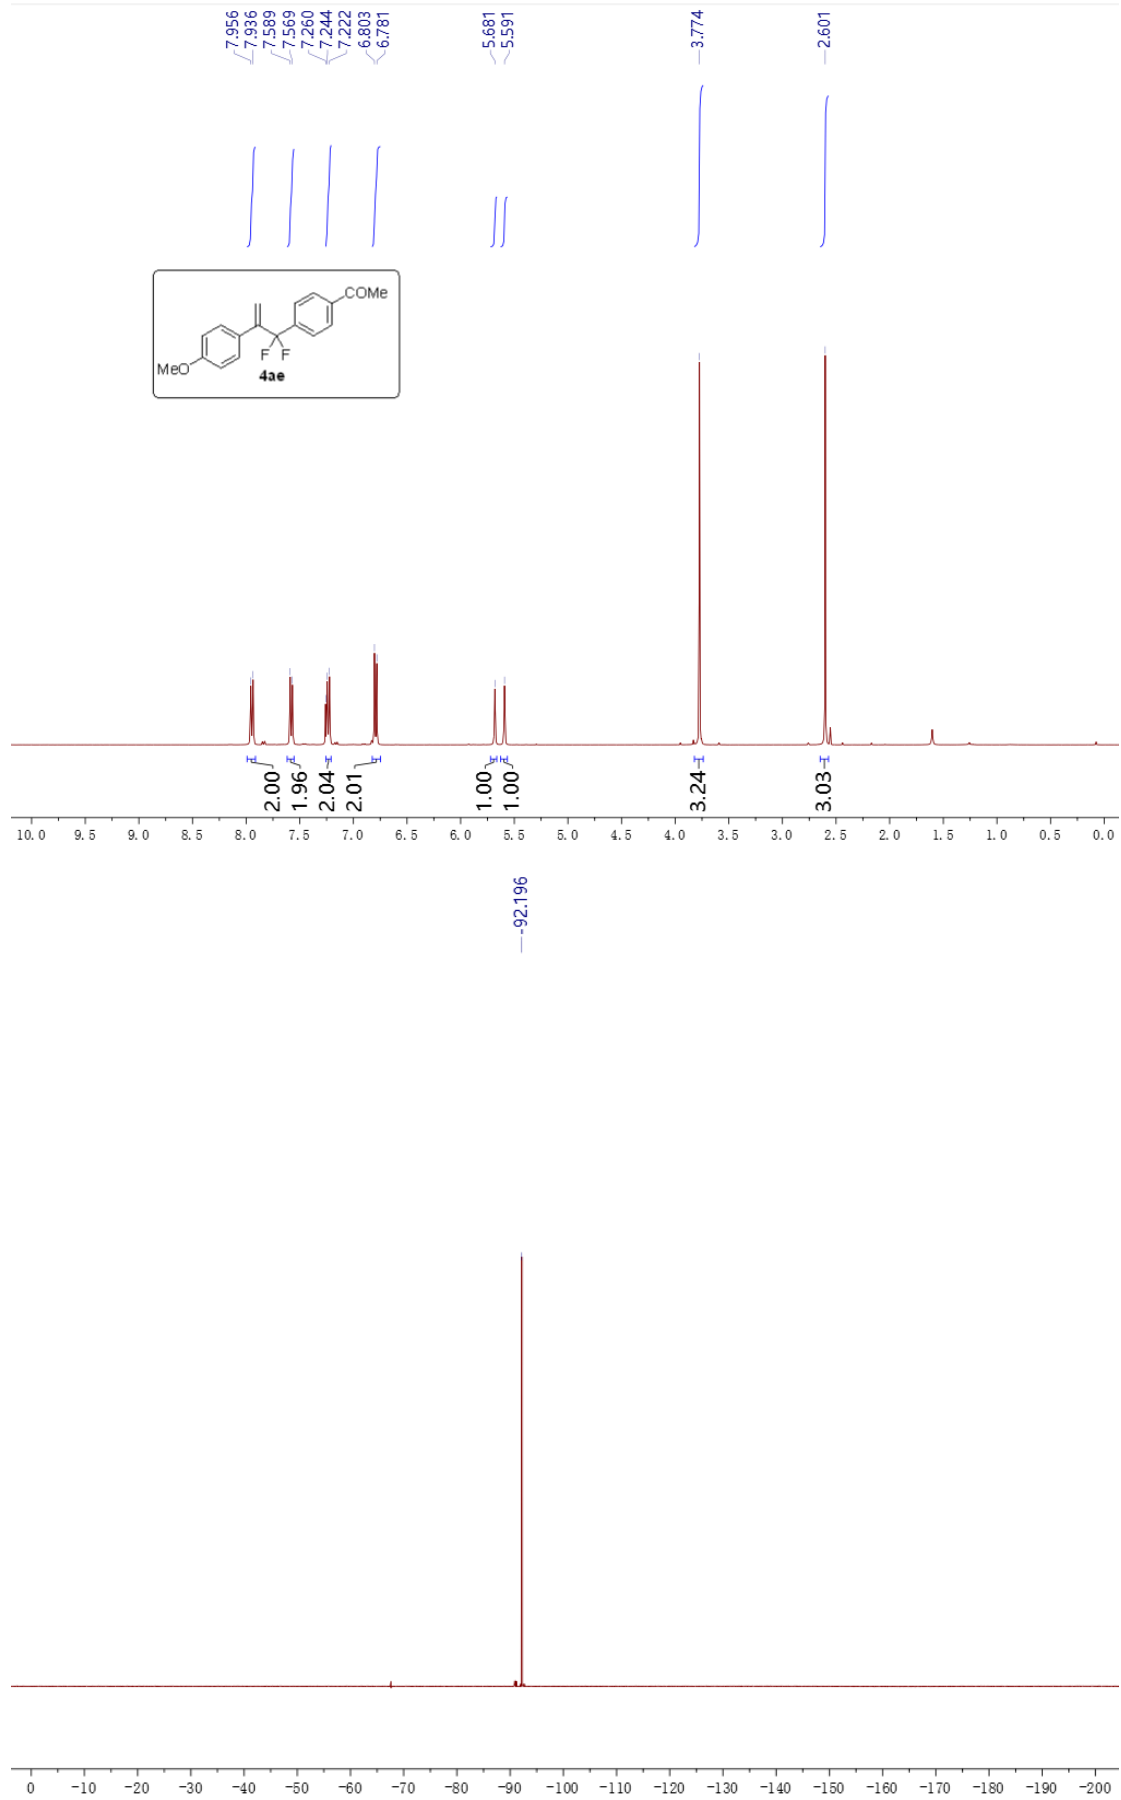

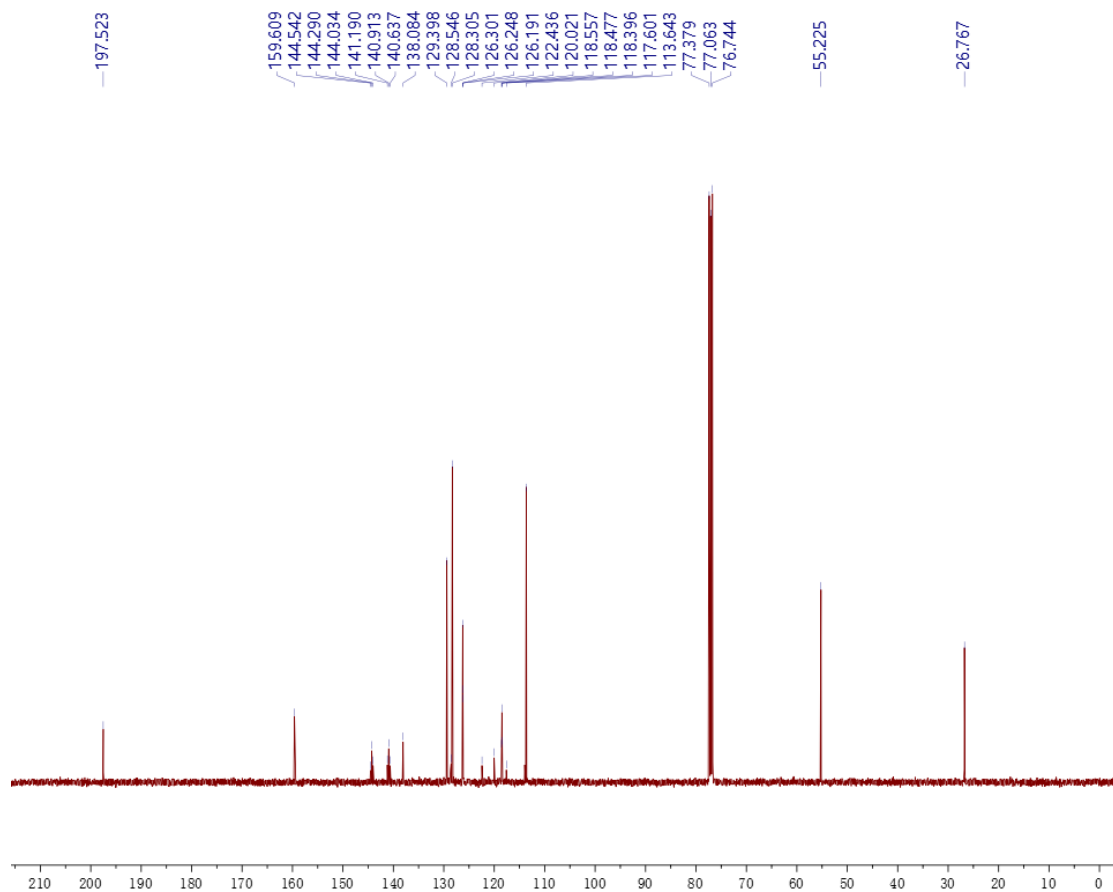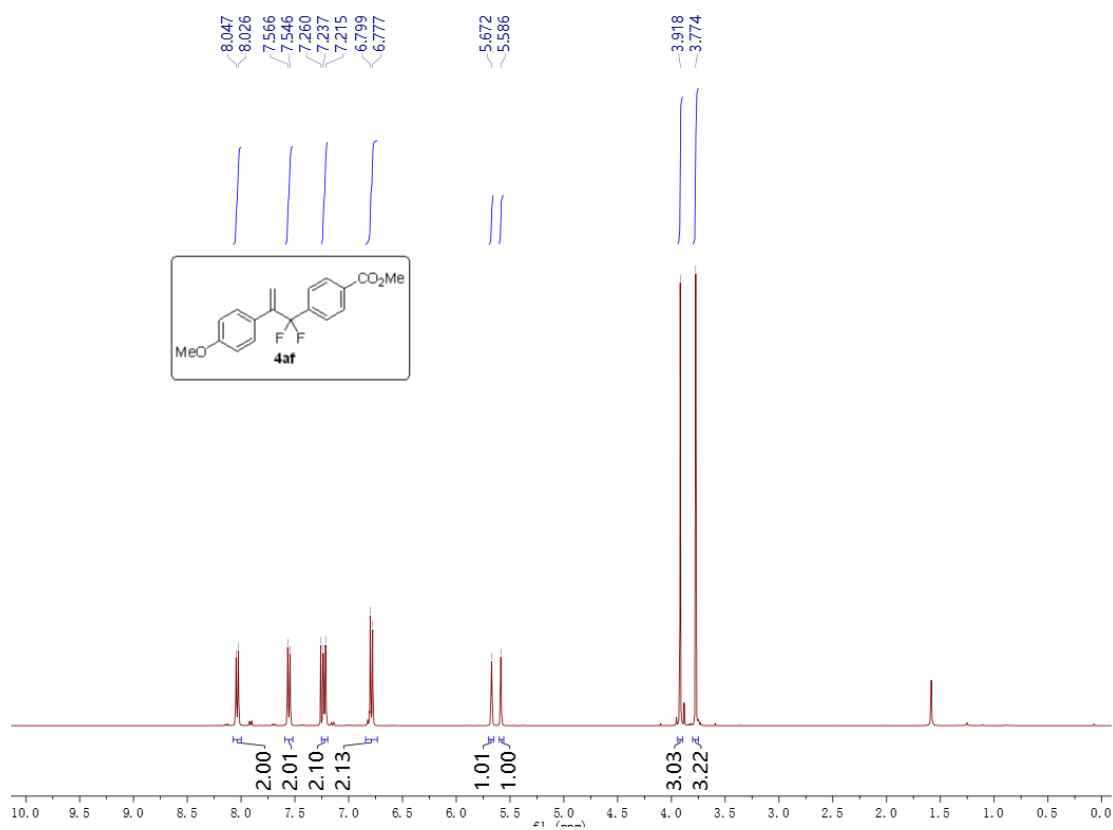

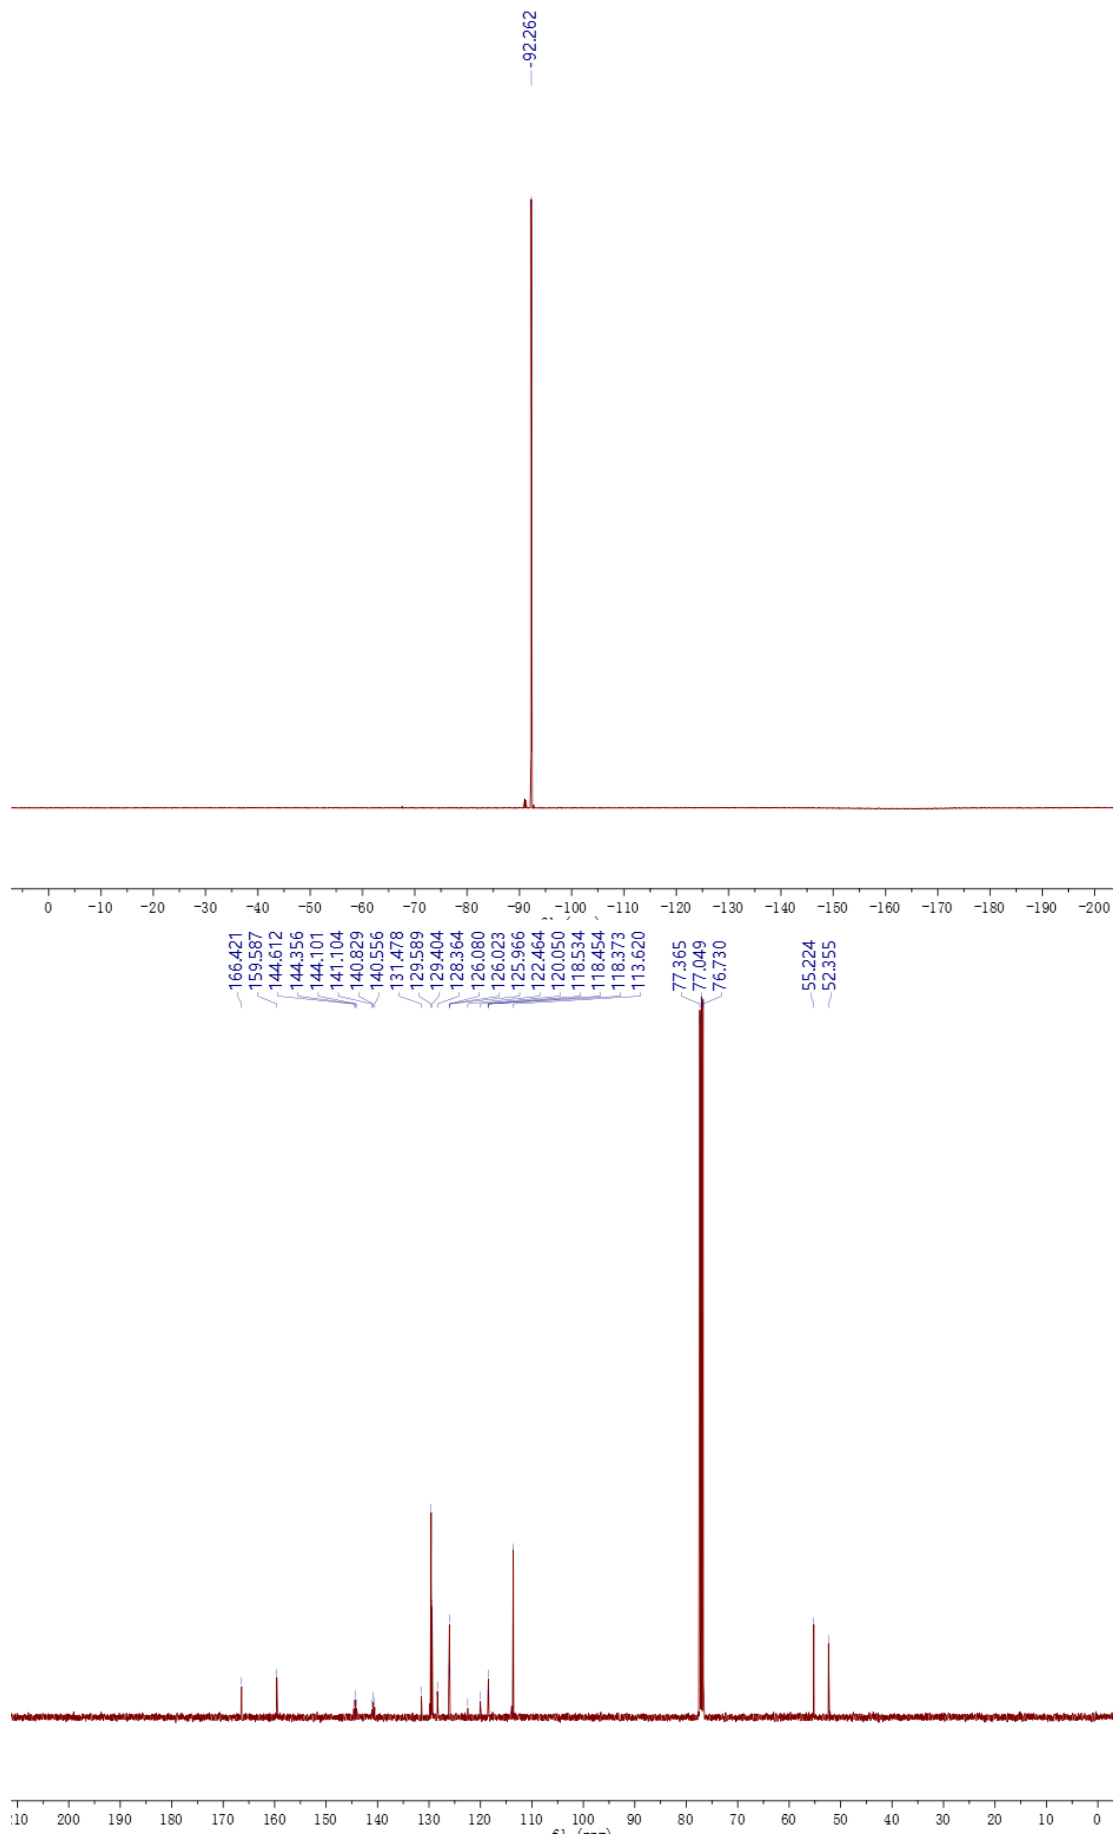

LN-5-44A-6  
angle\_pulse

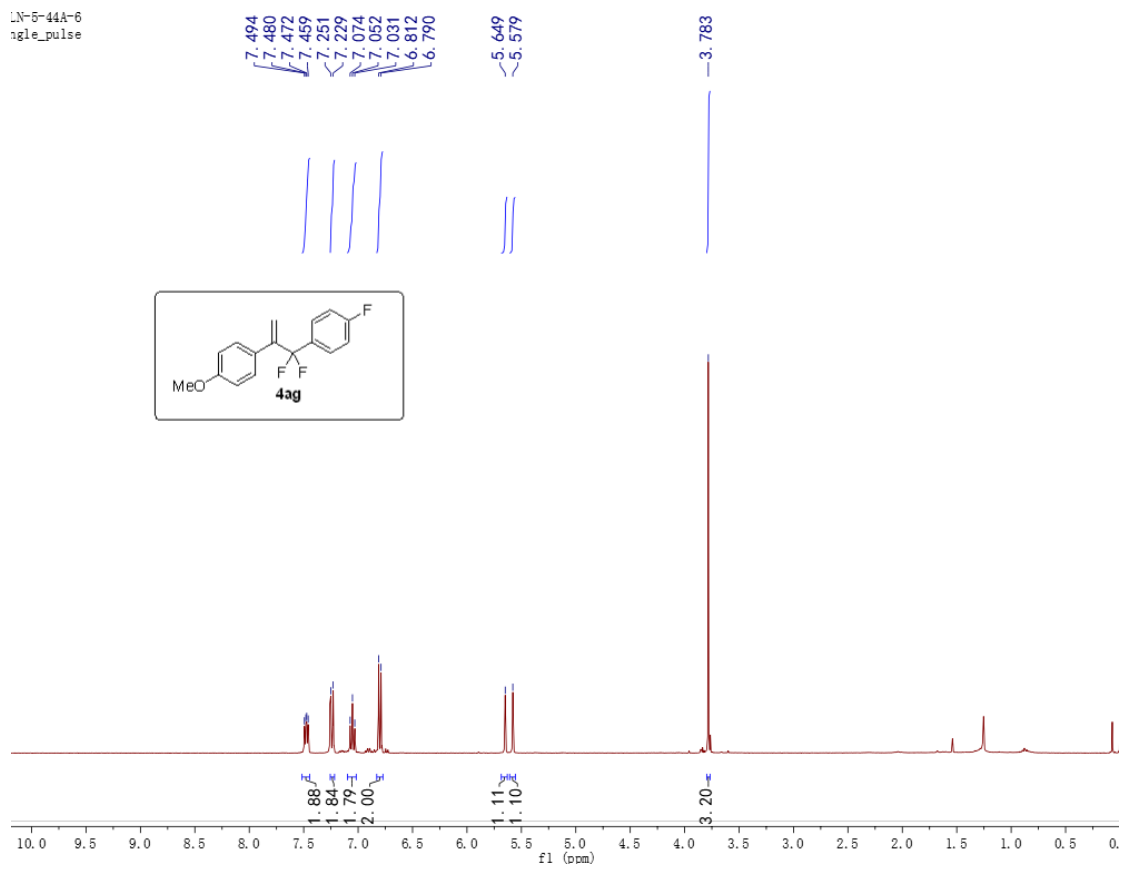

LN-5-44A-6  
angle\_pulse

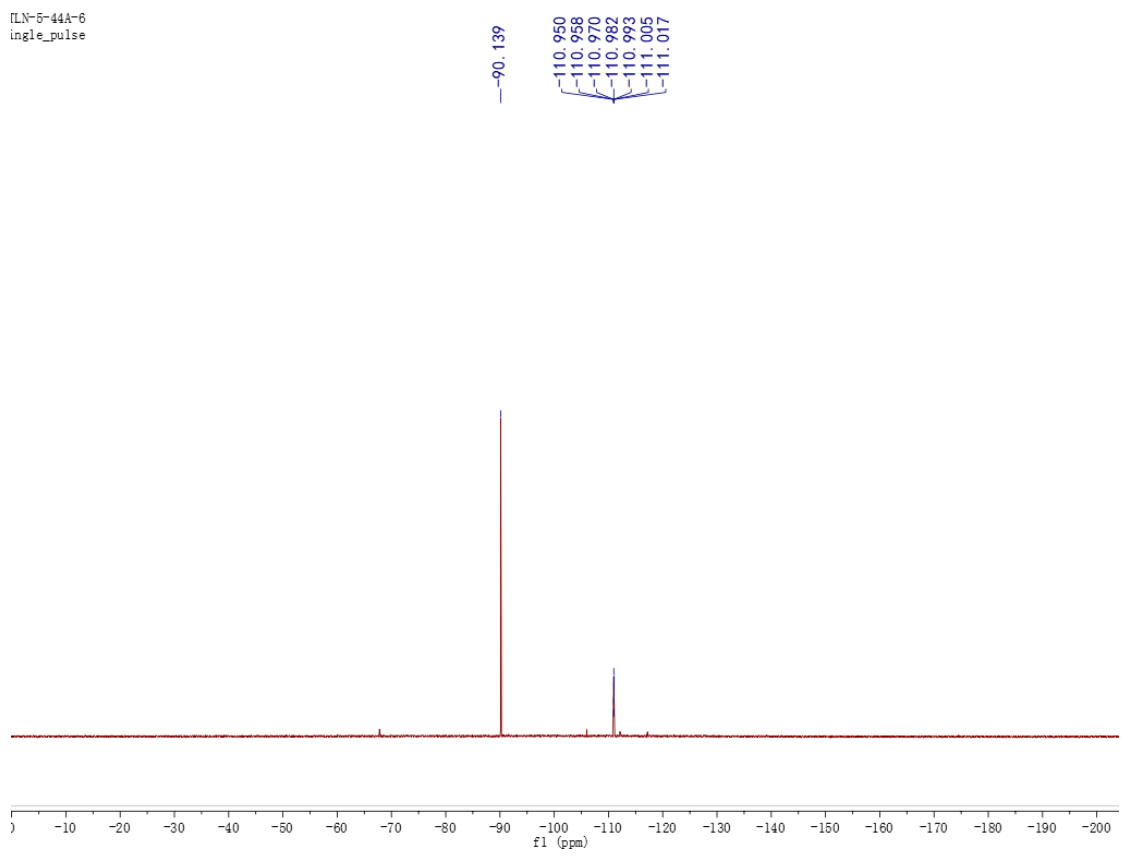

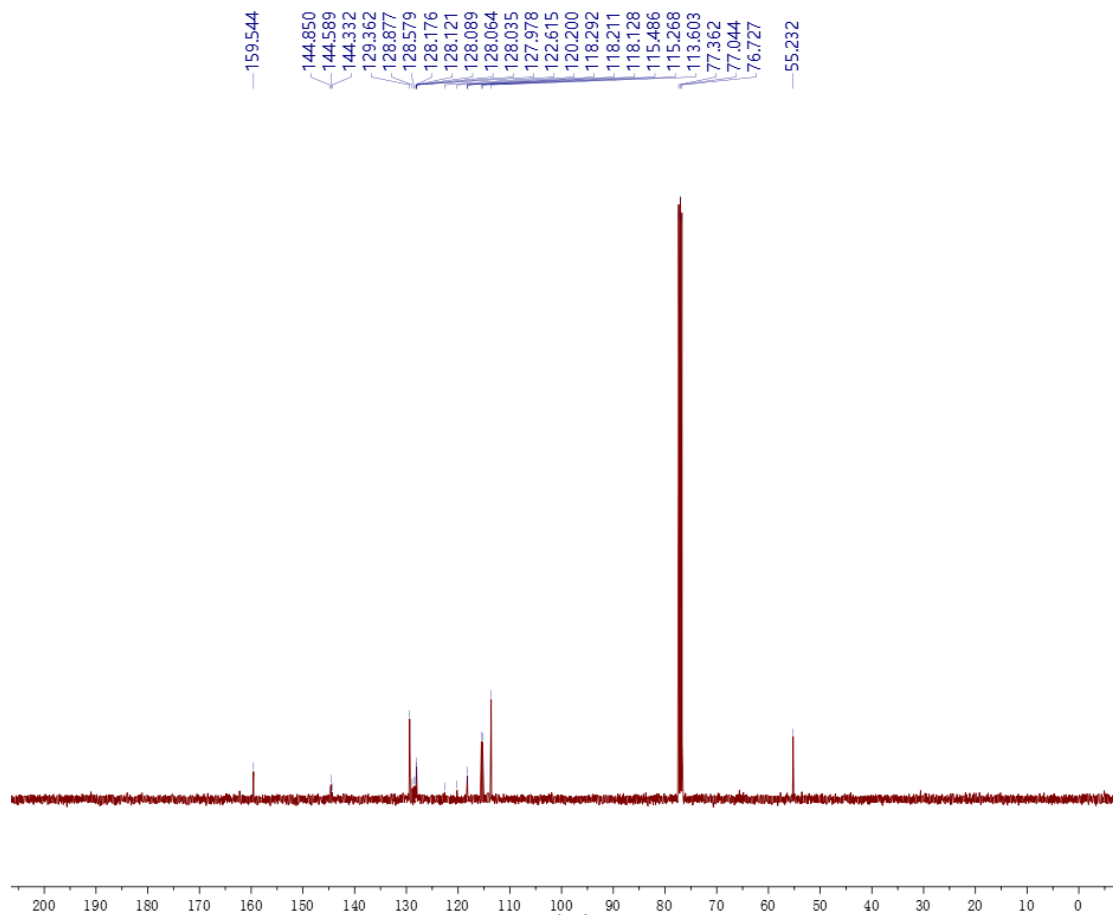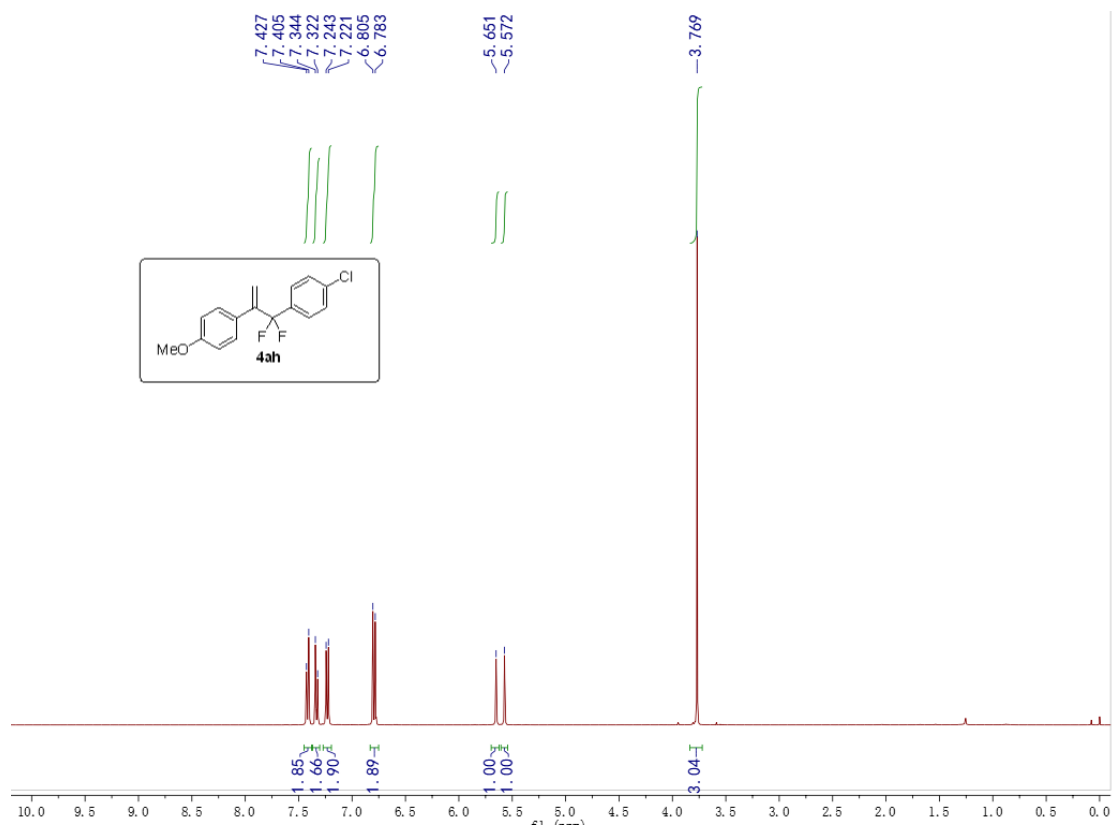

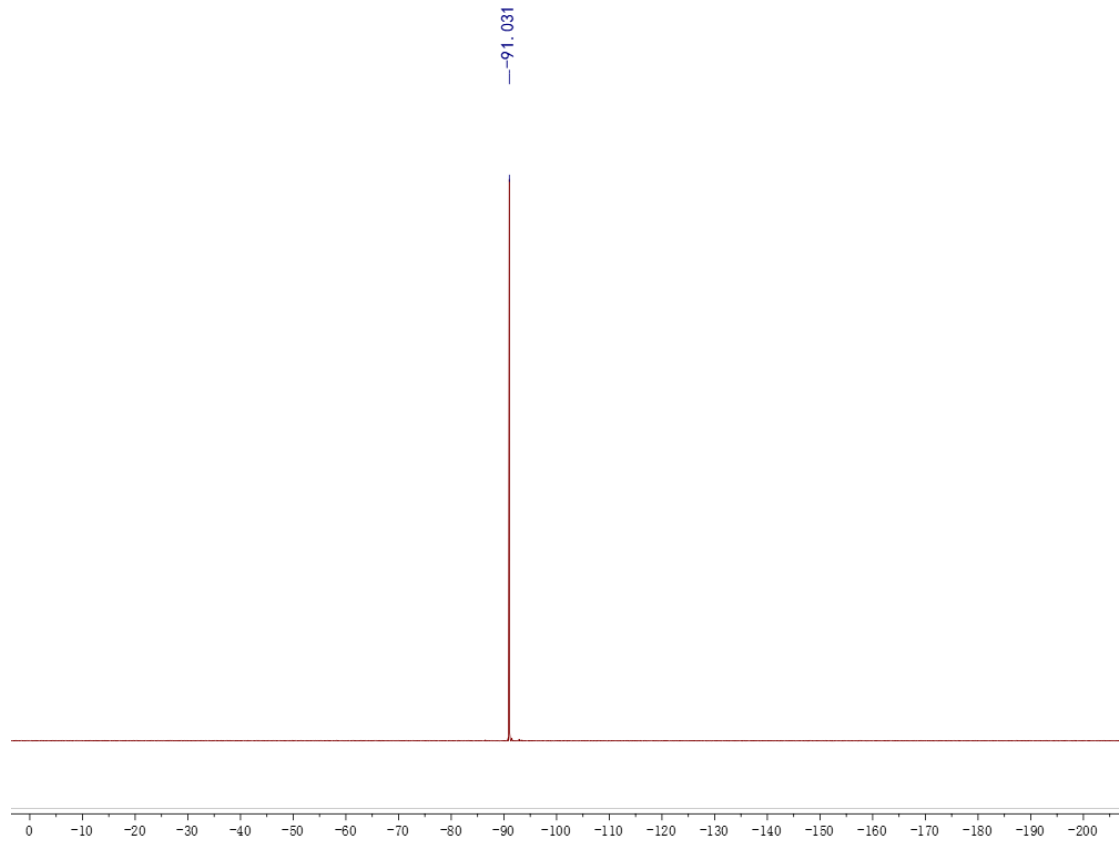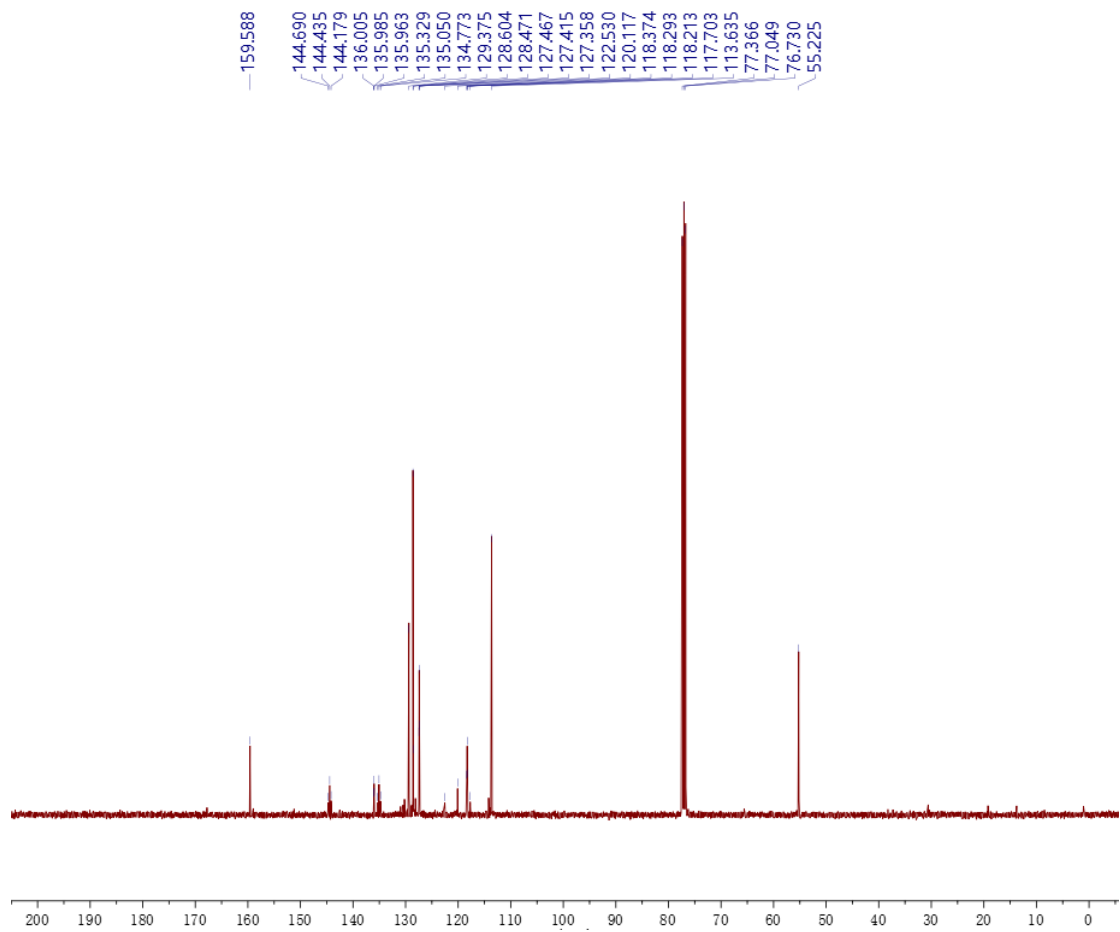

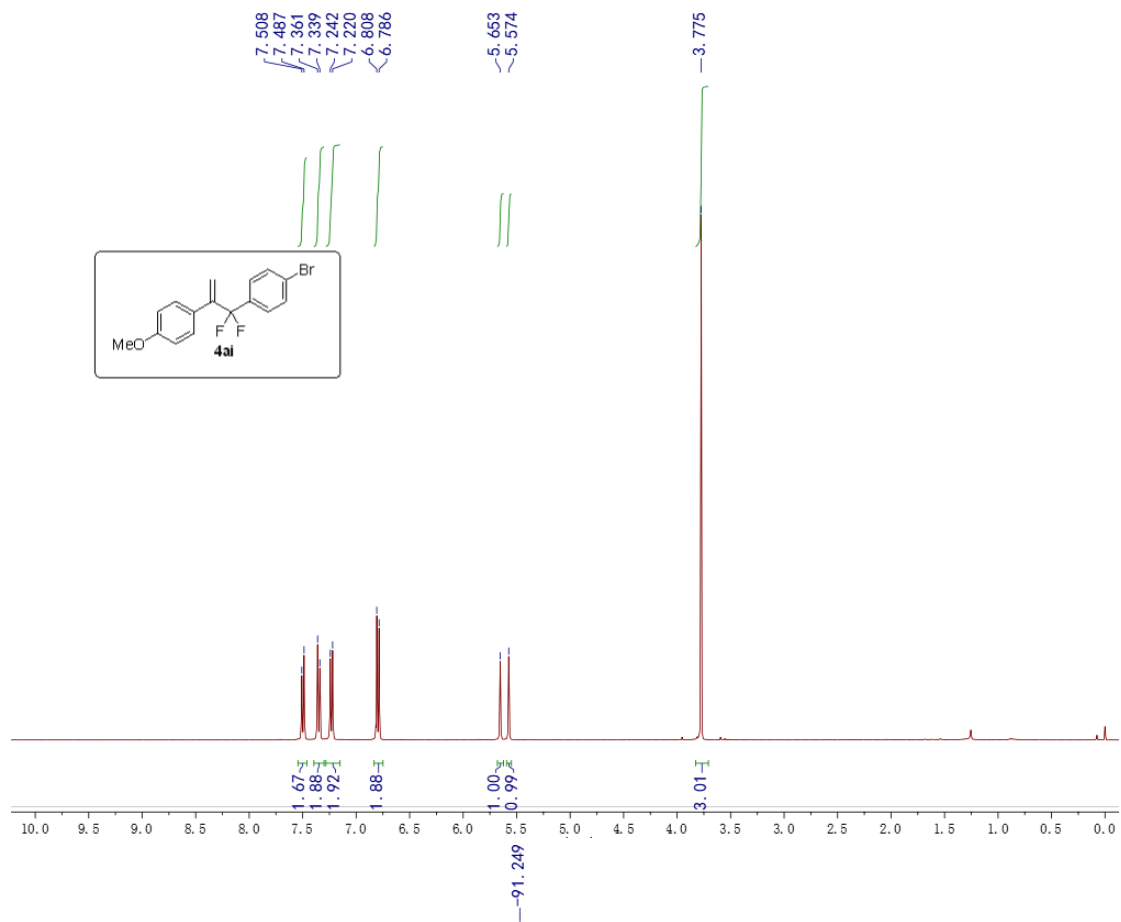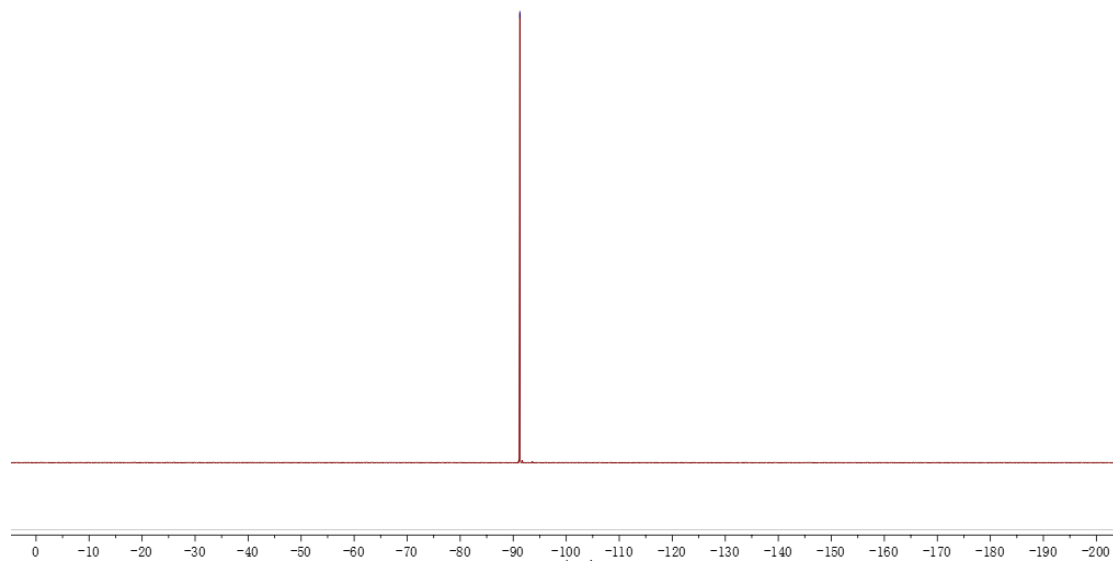



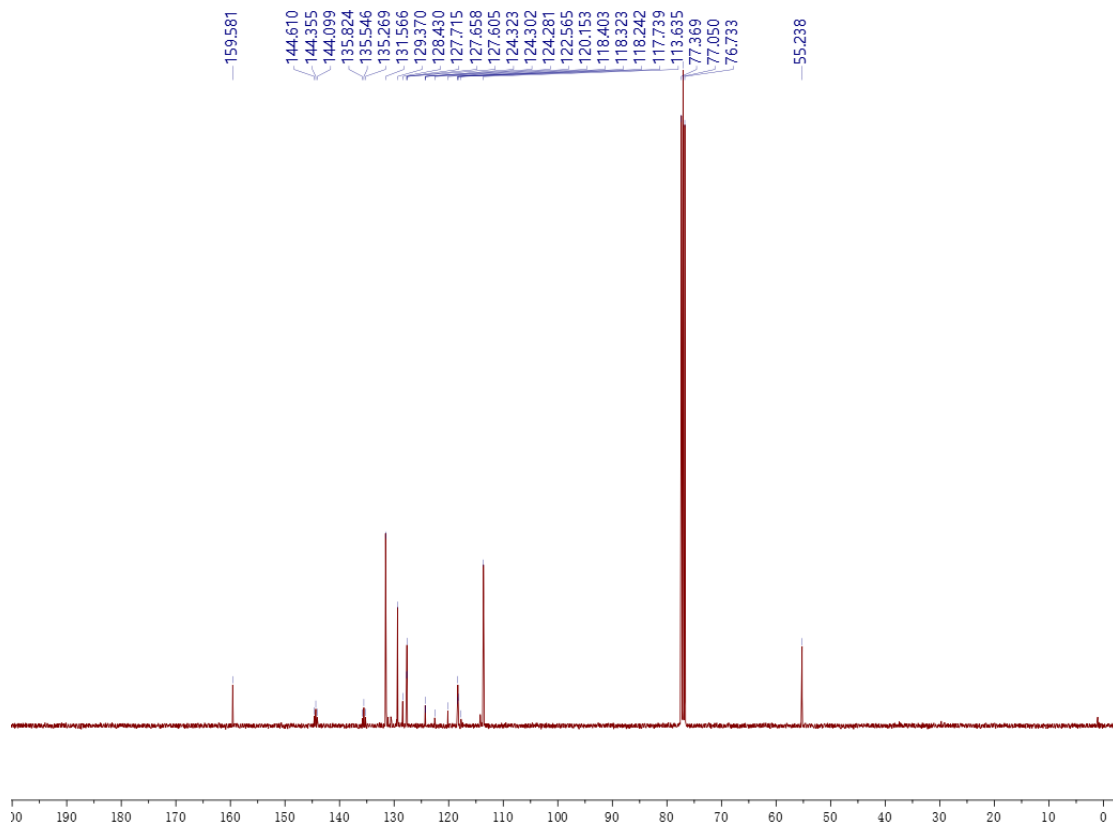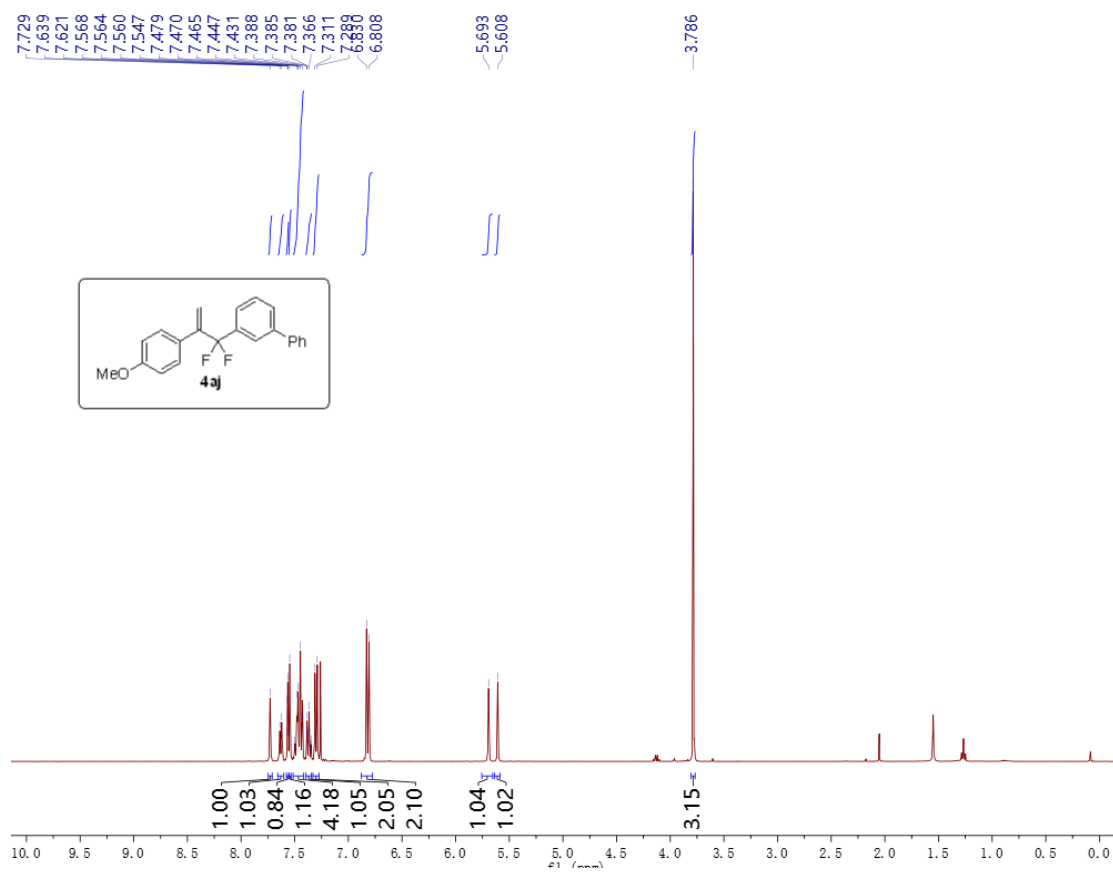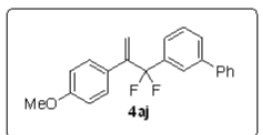

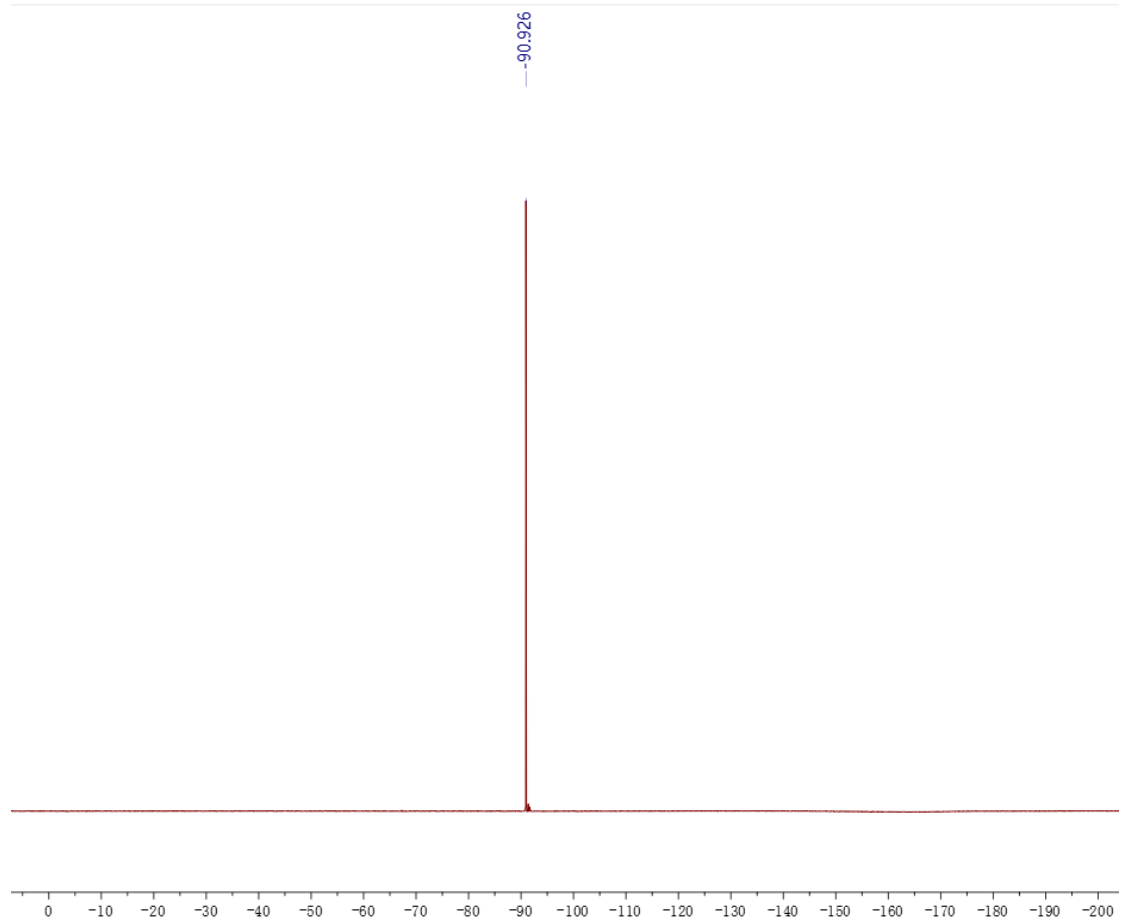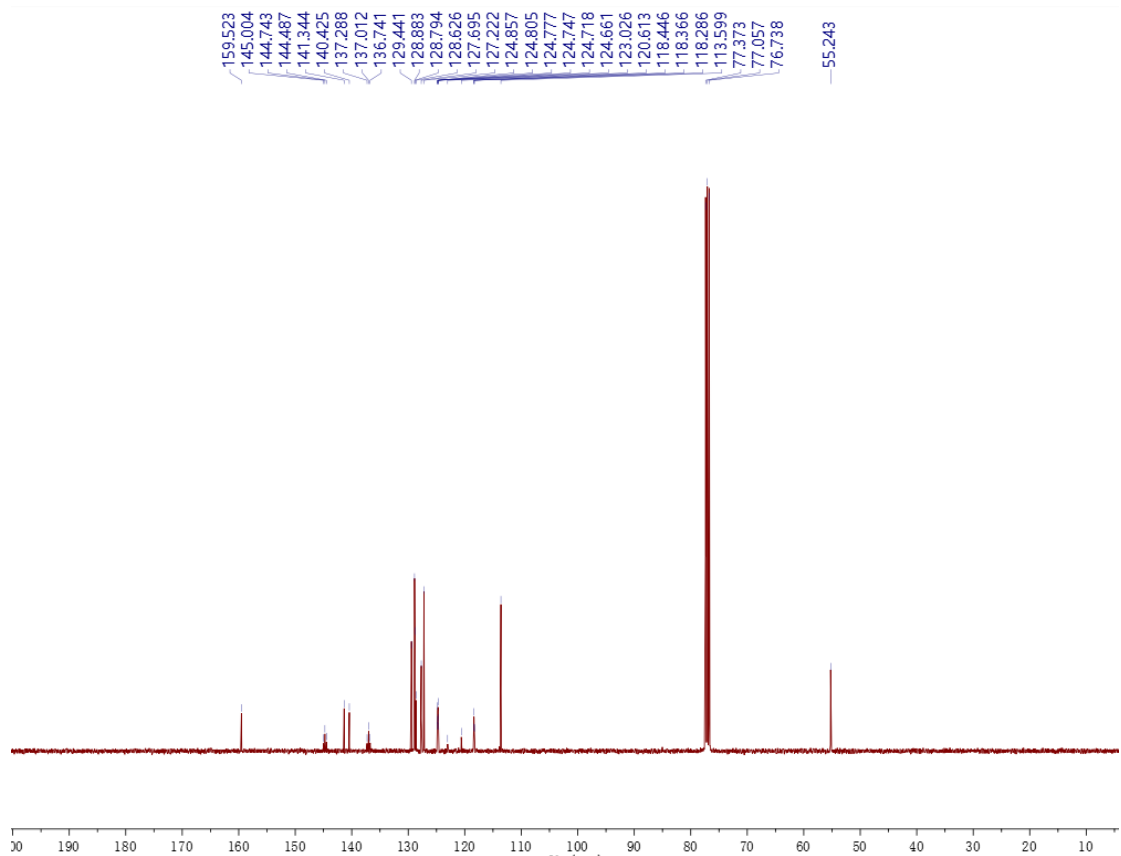

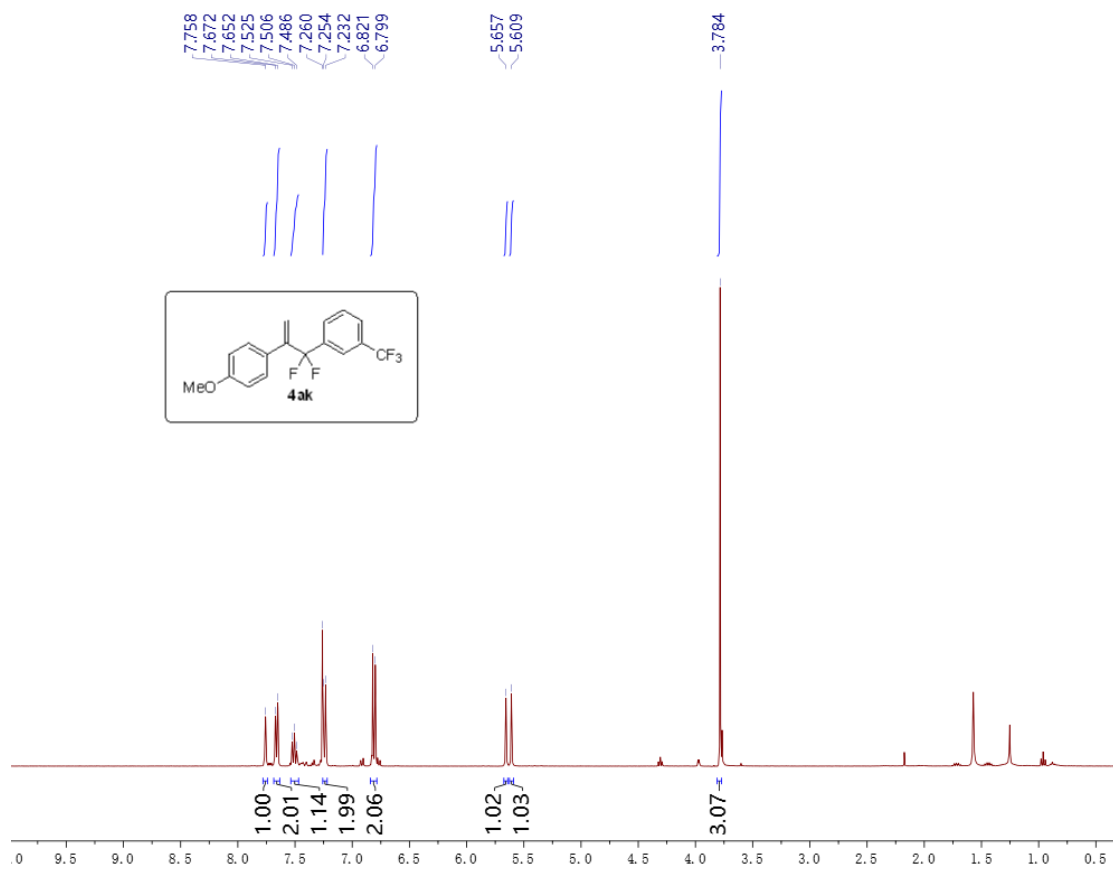

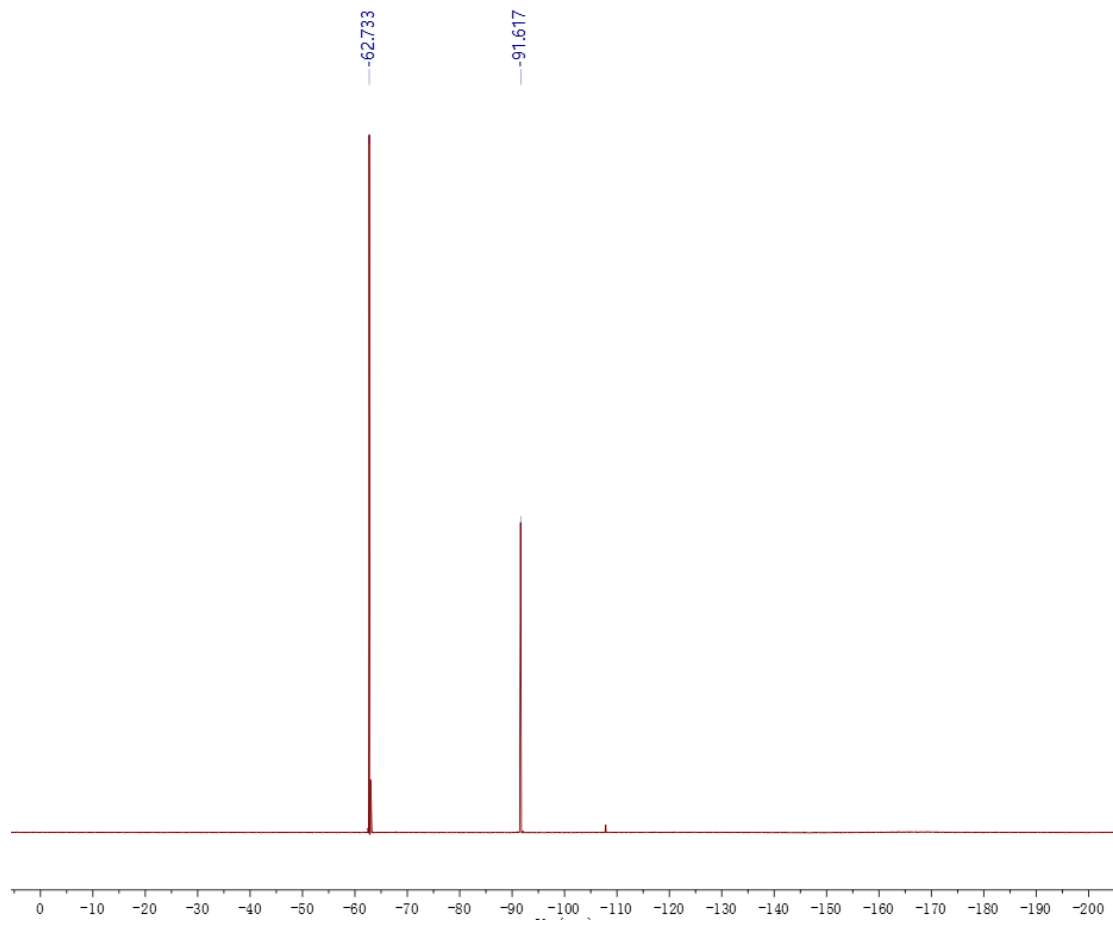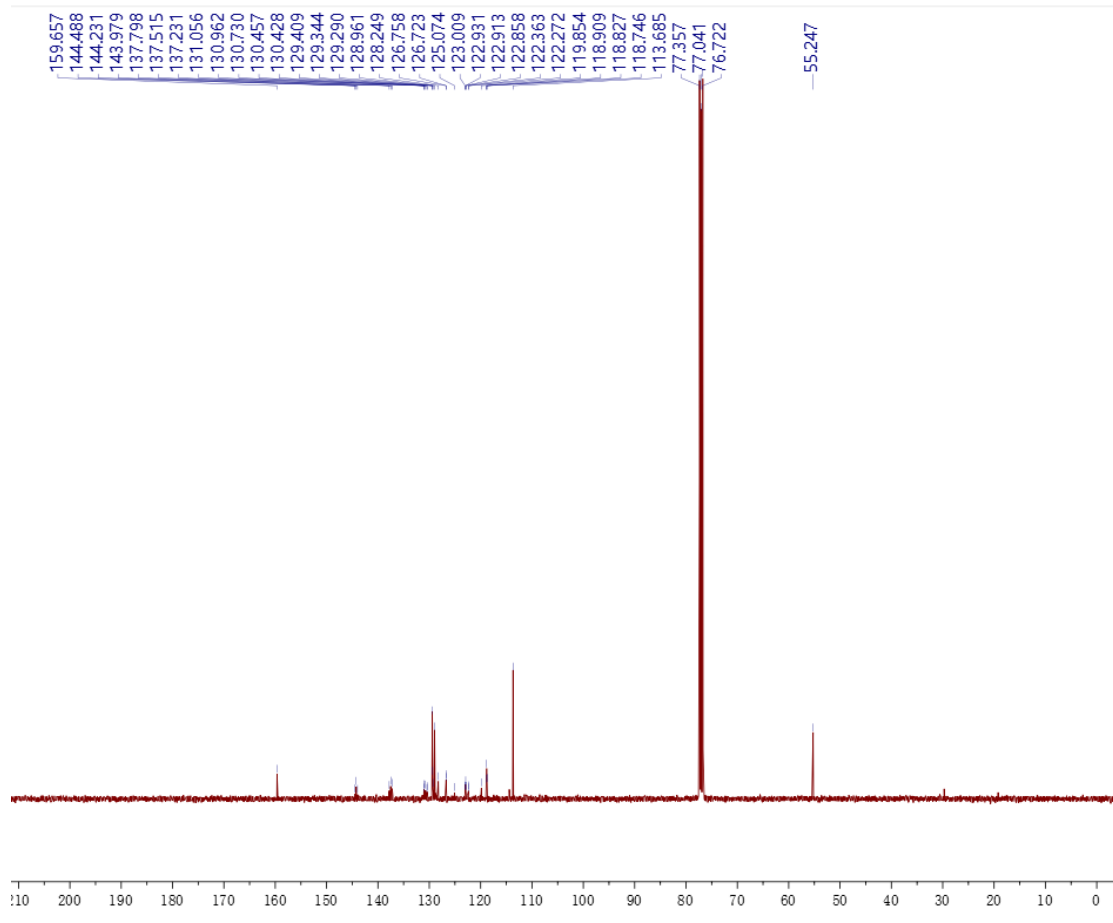

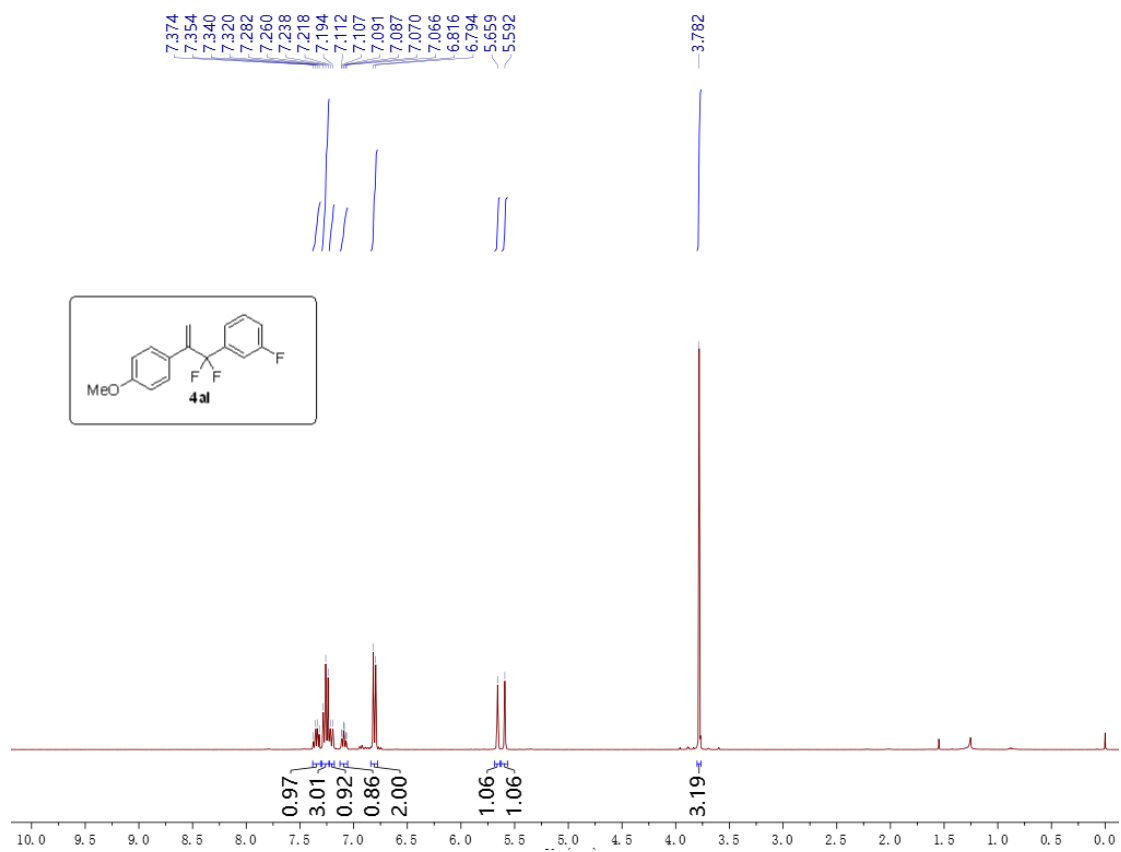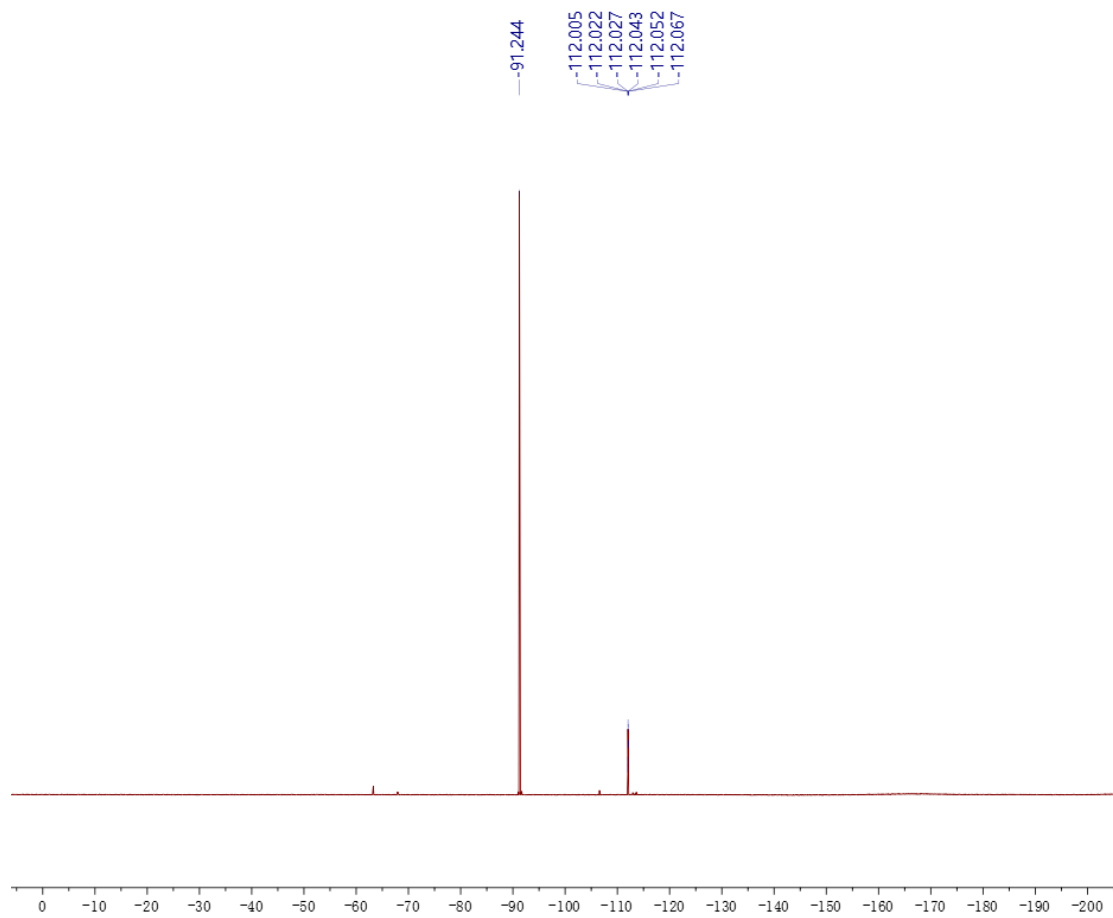

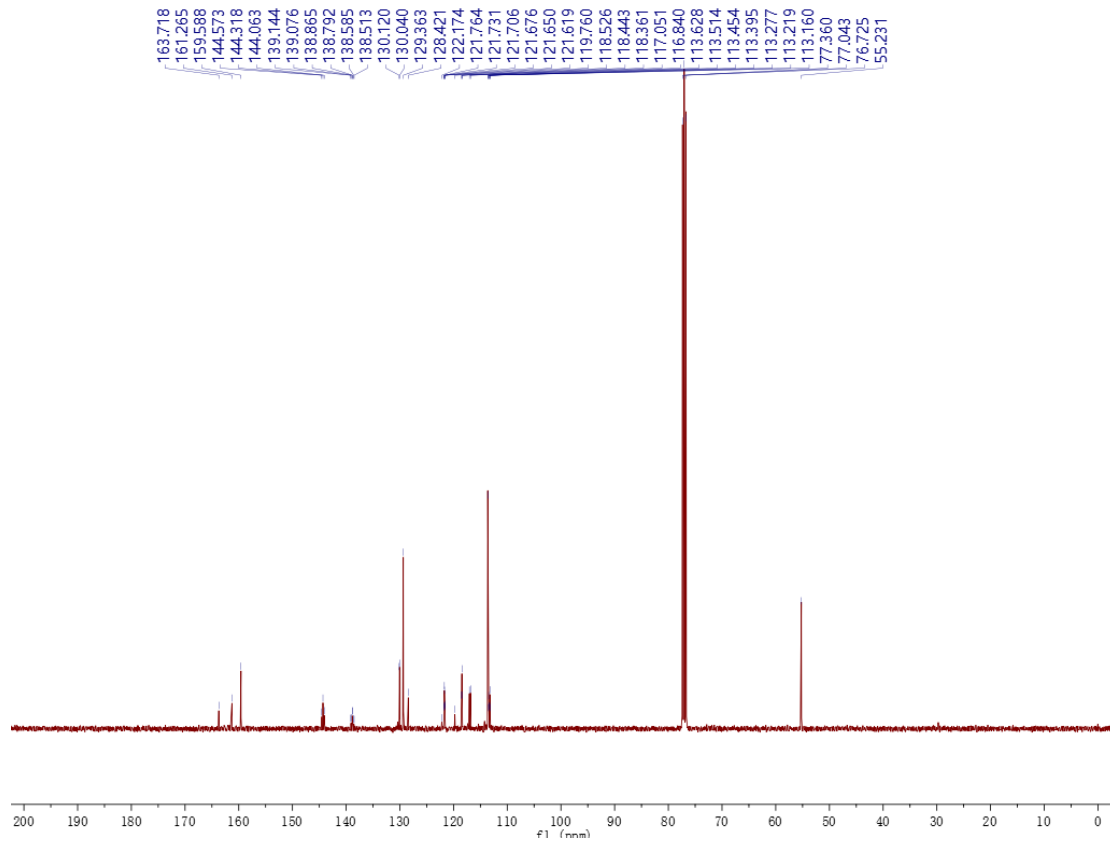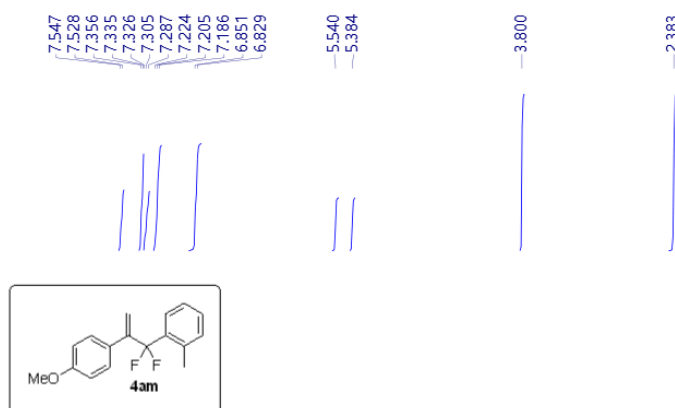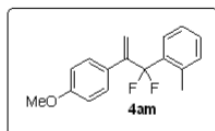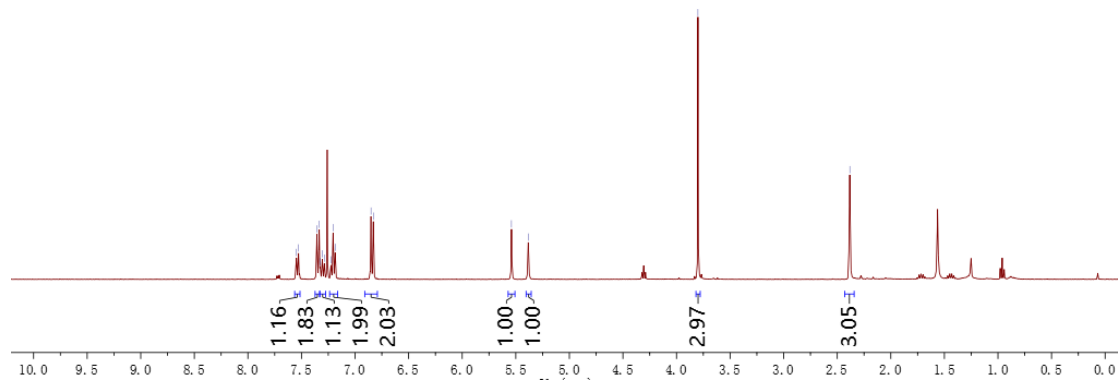

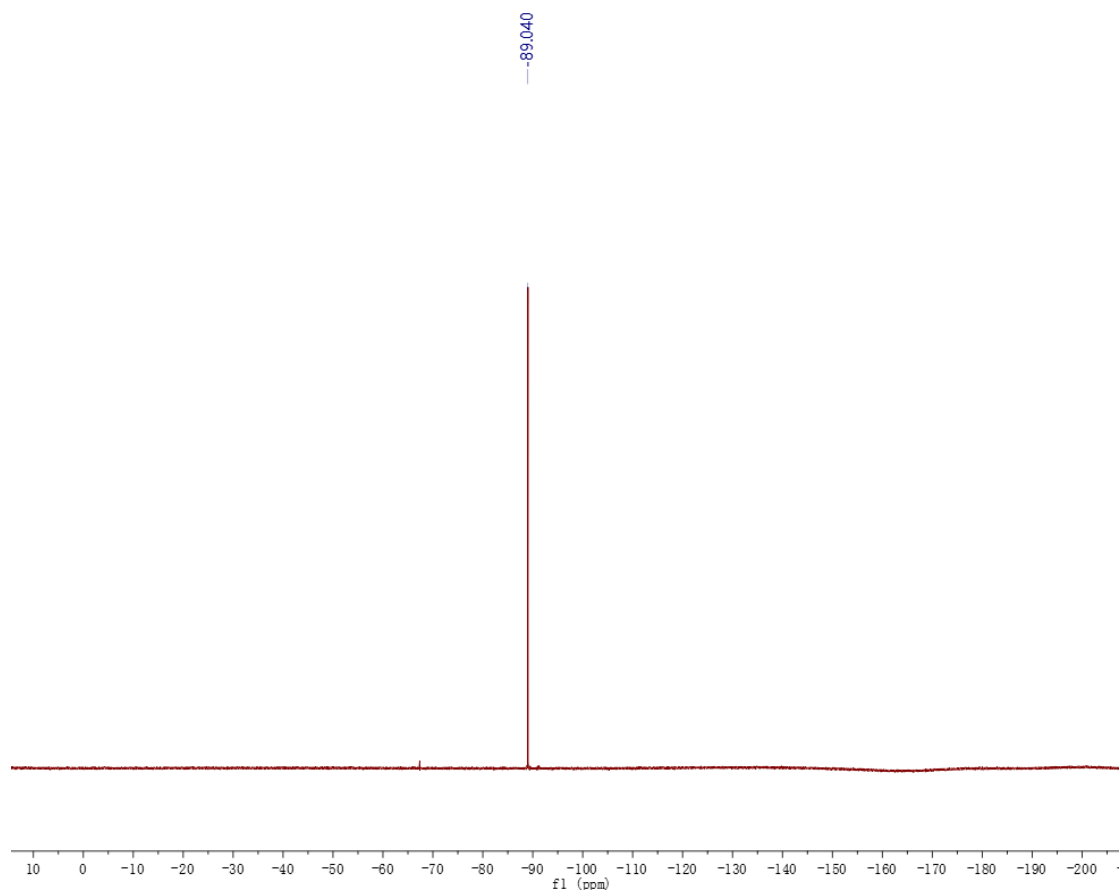

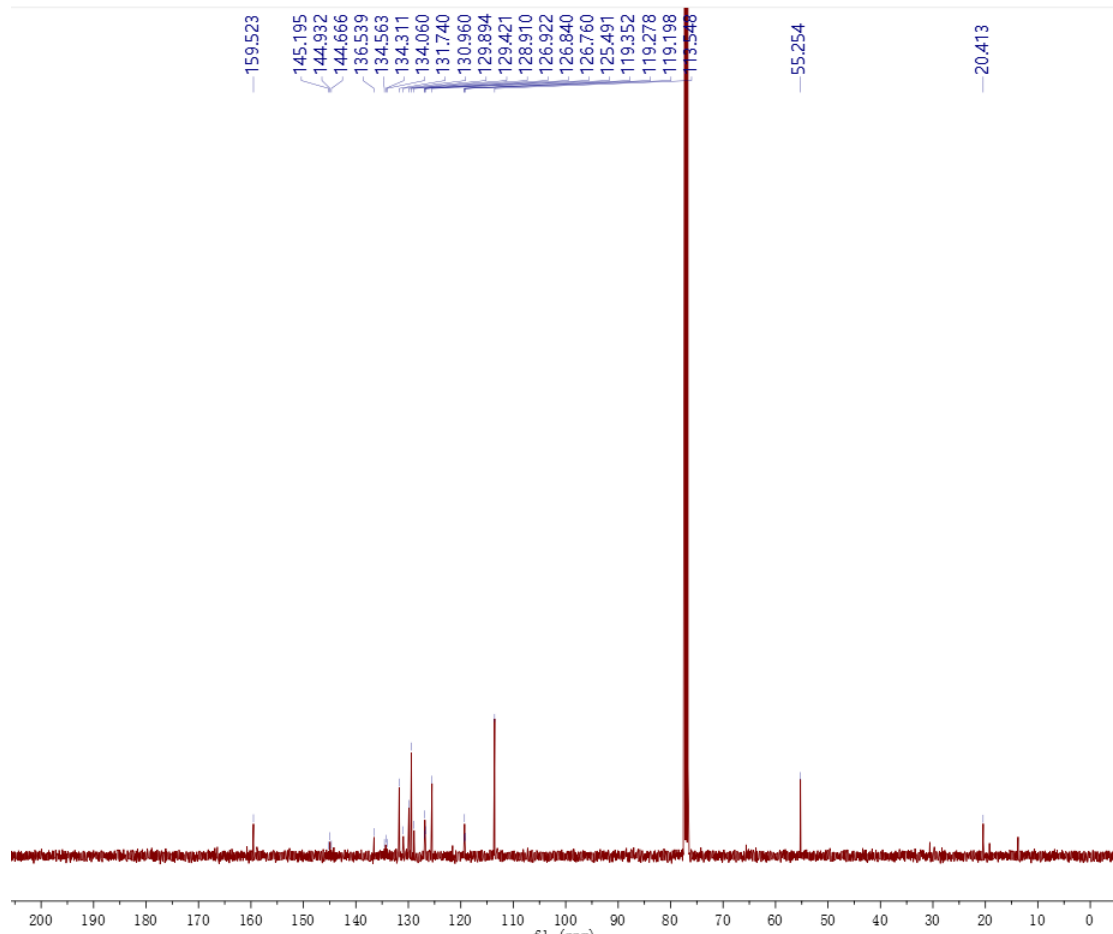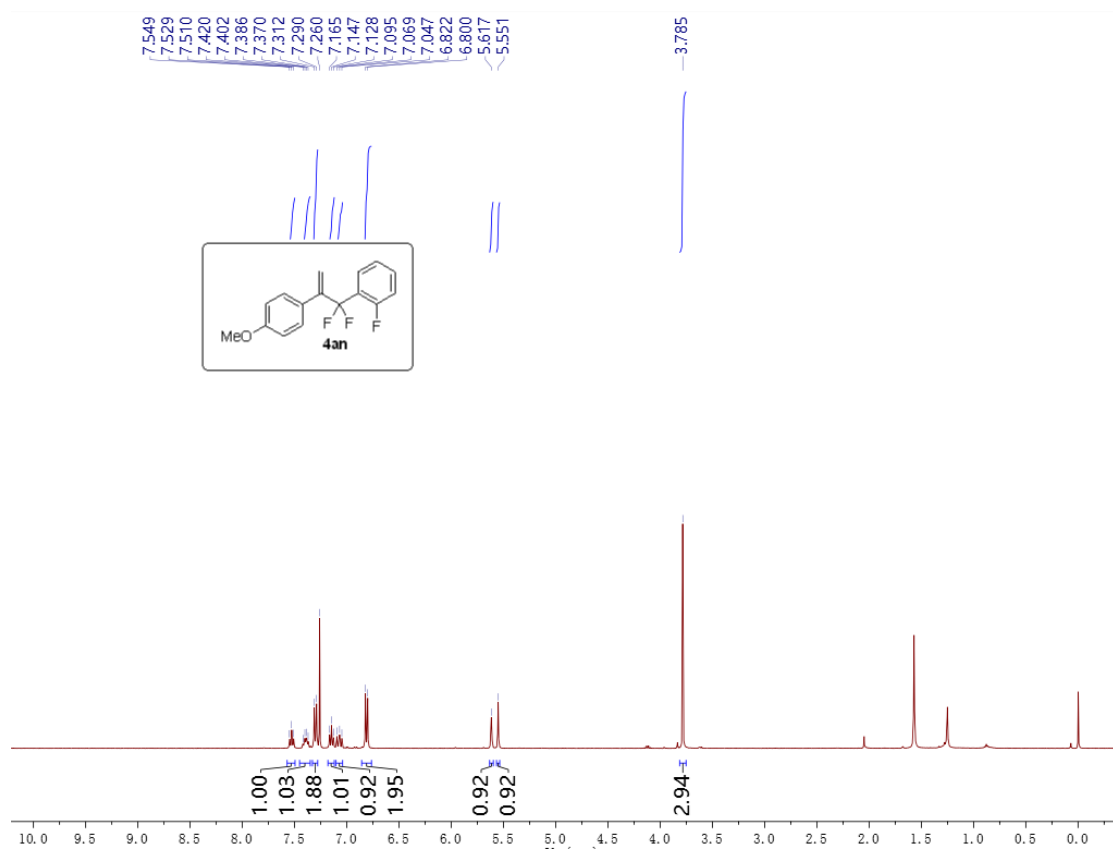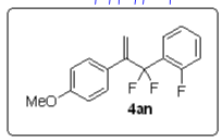



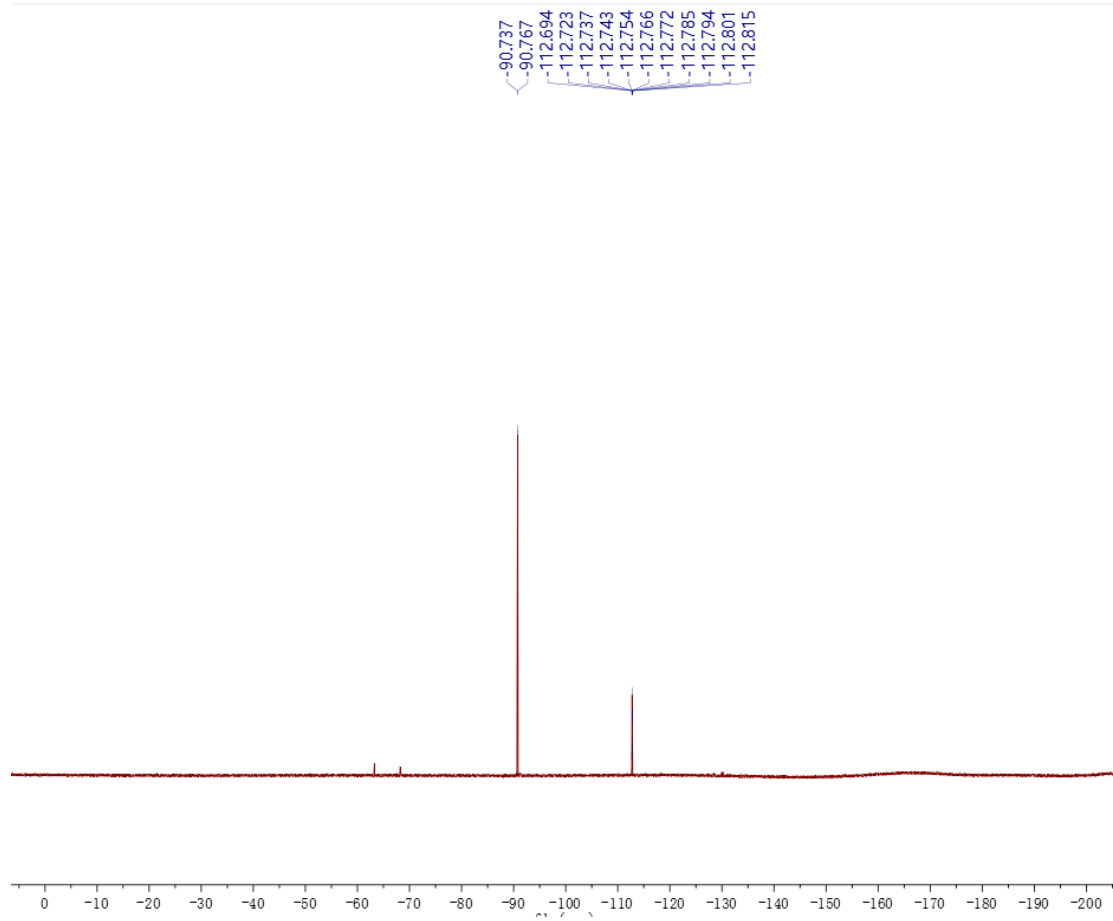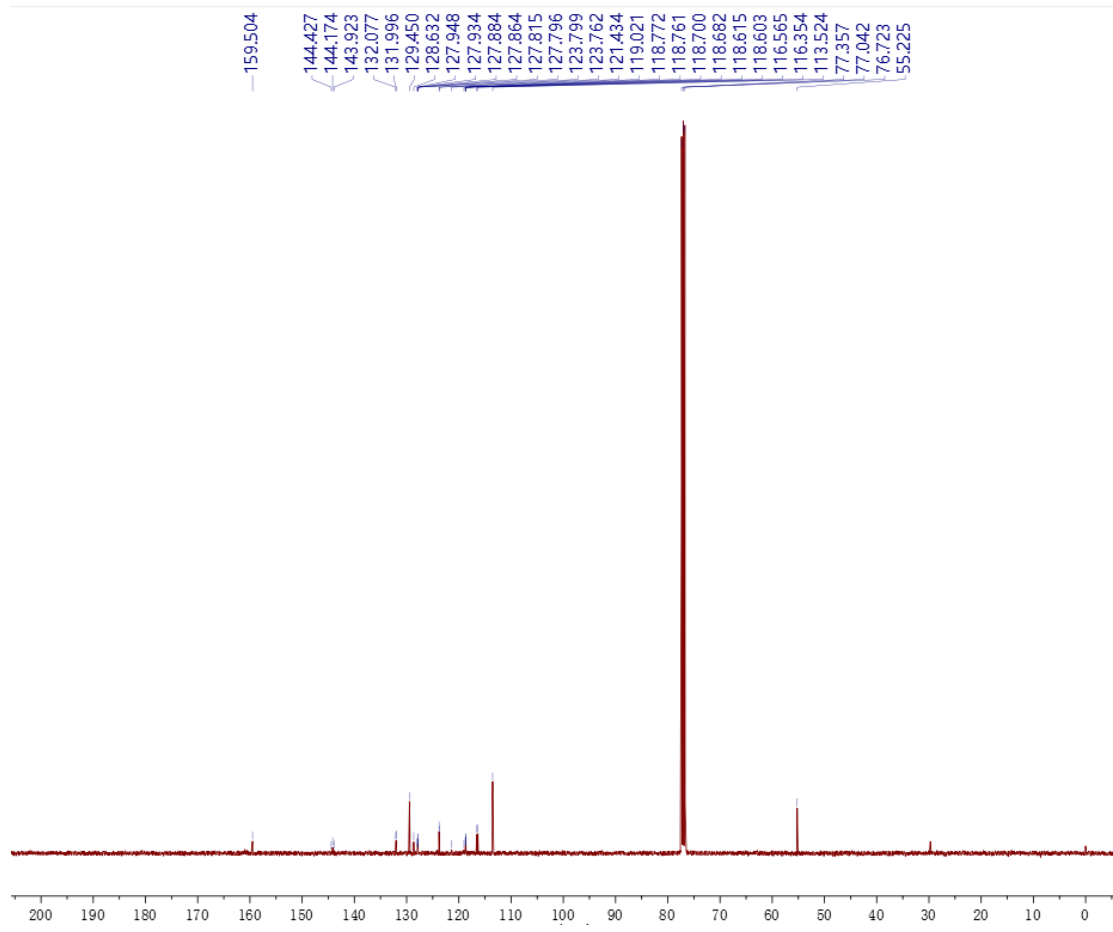

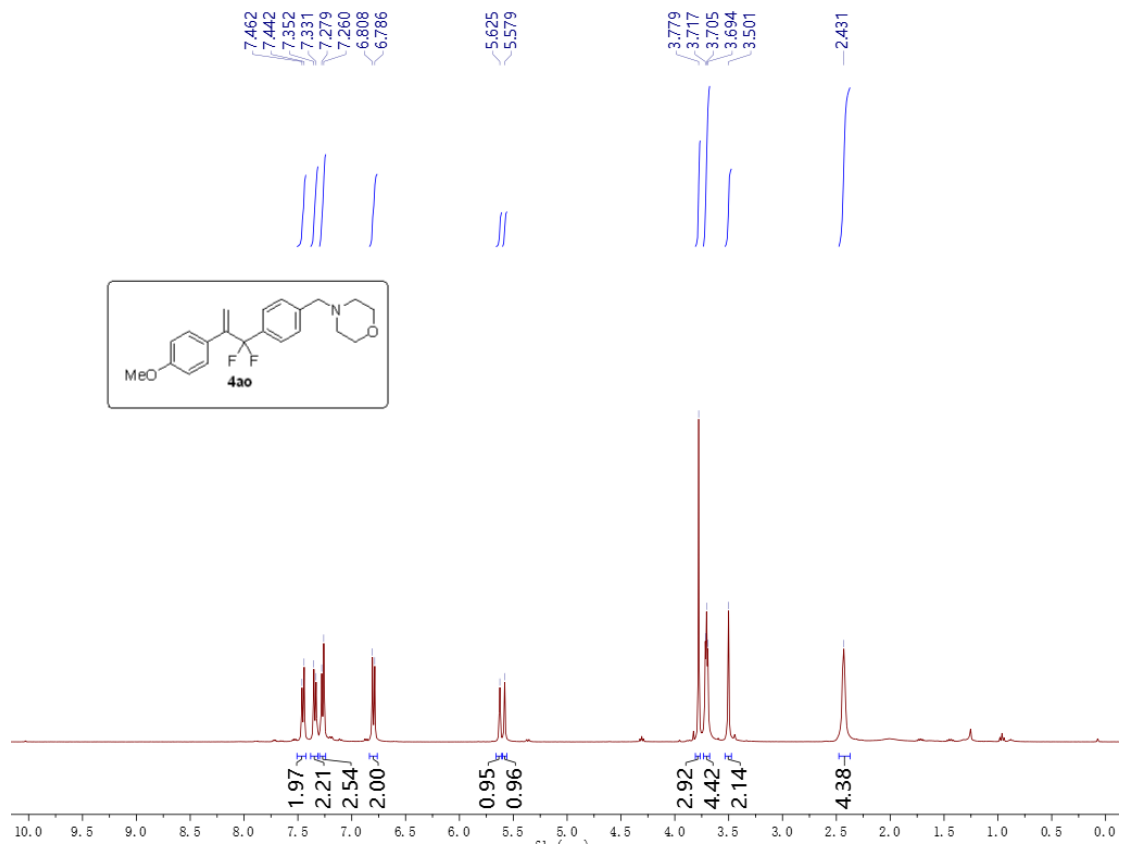

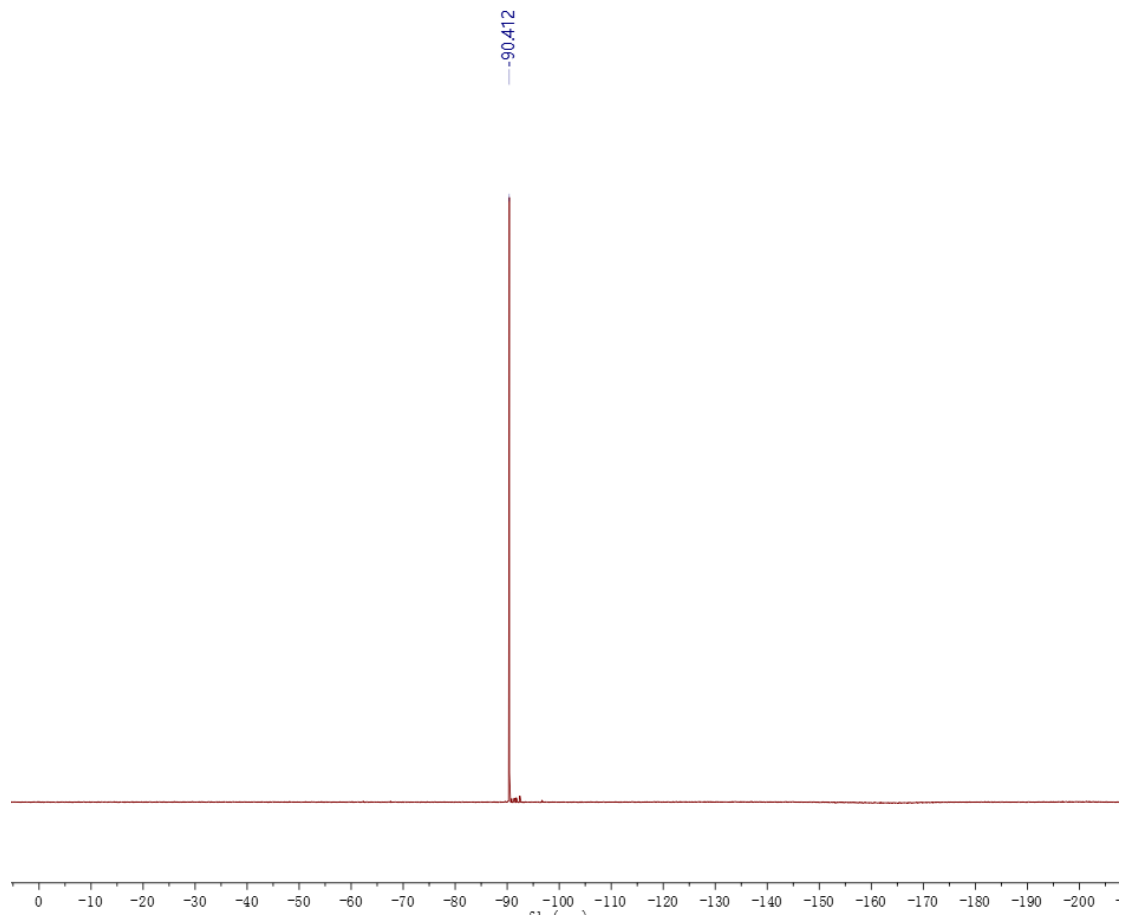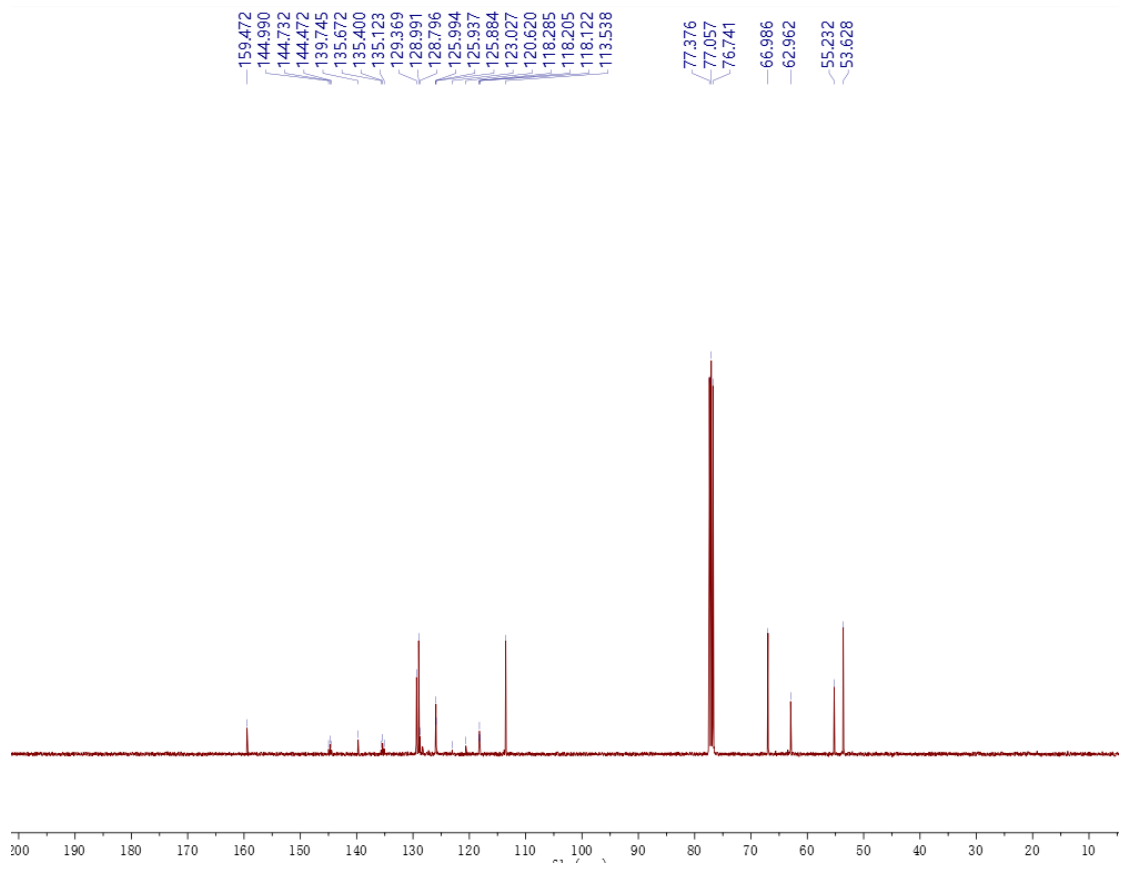

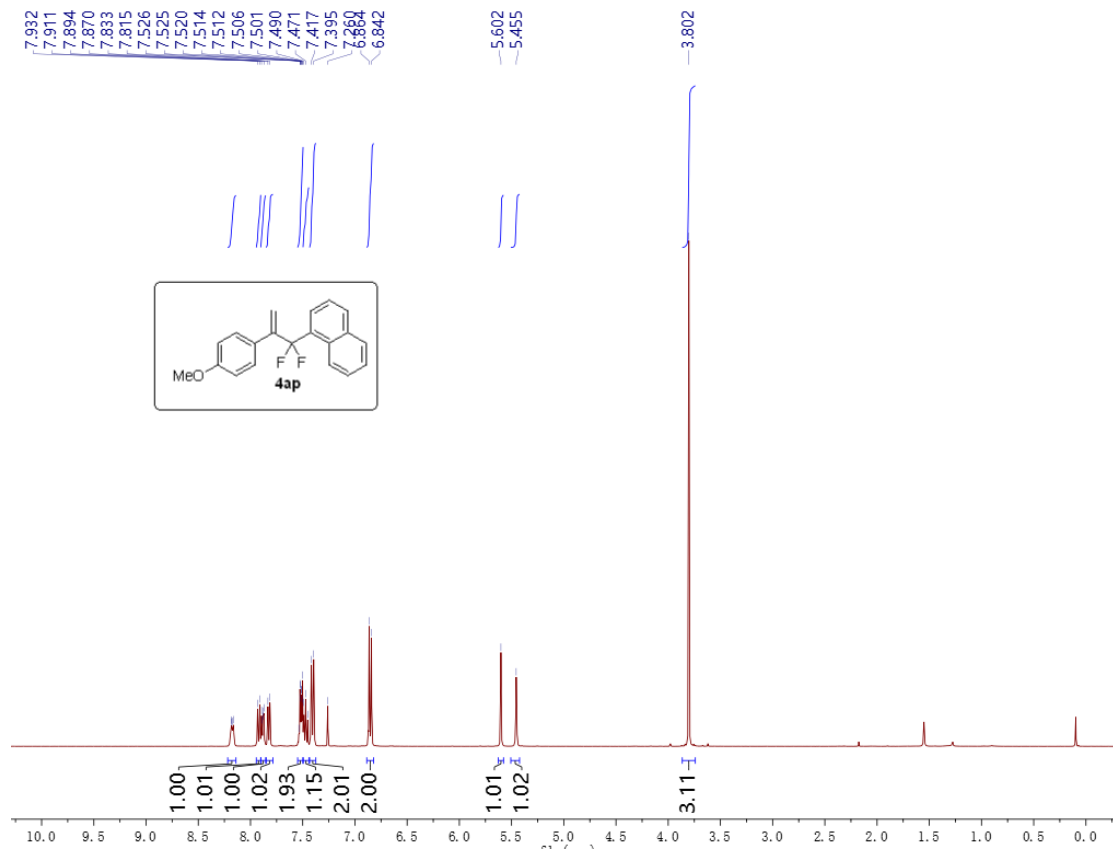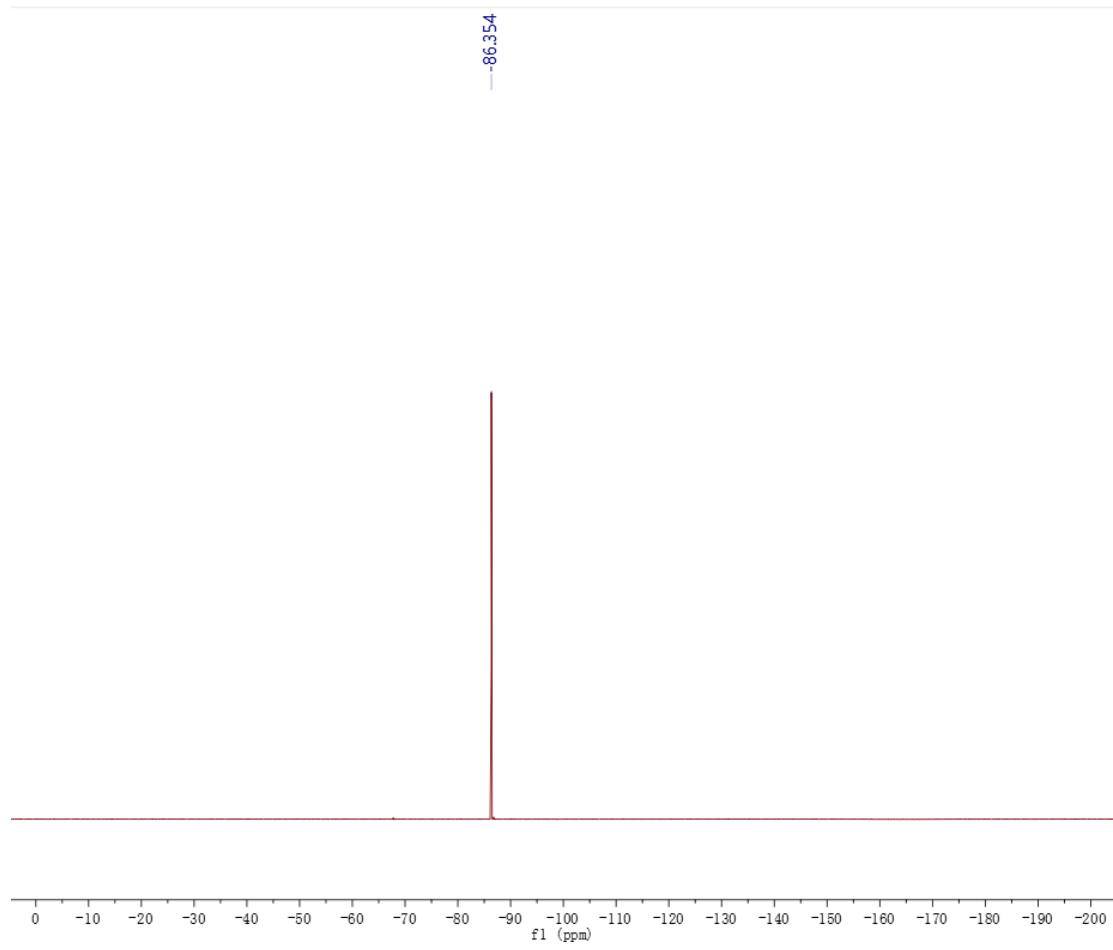

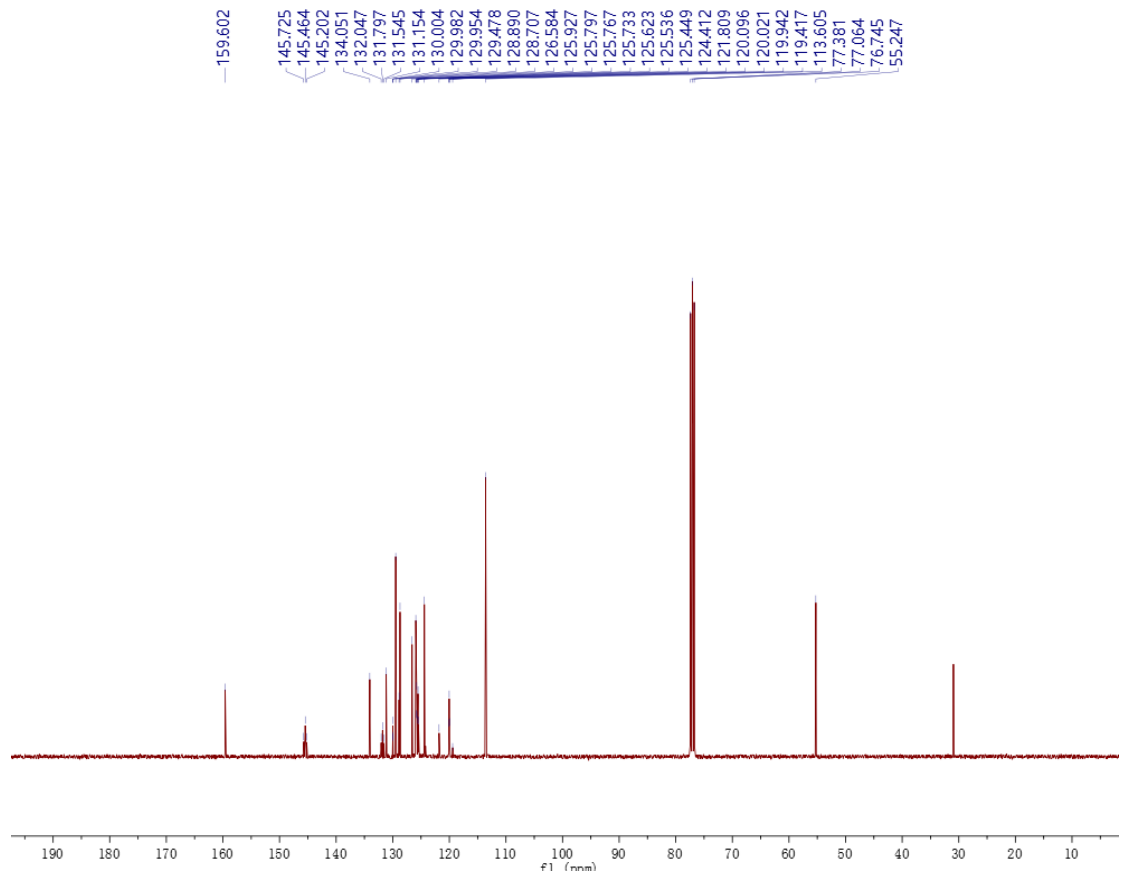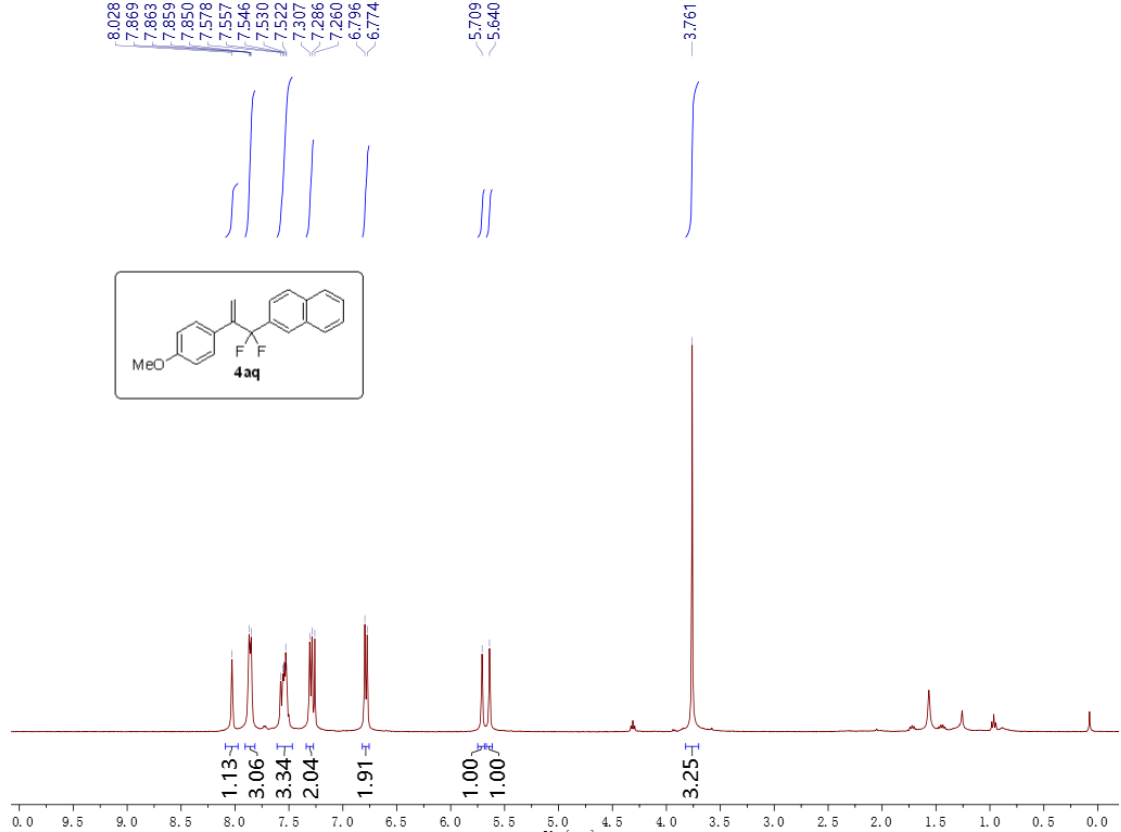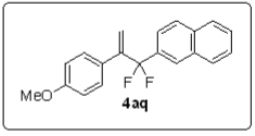

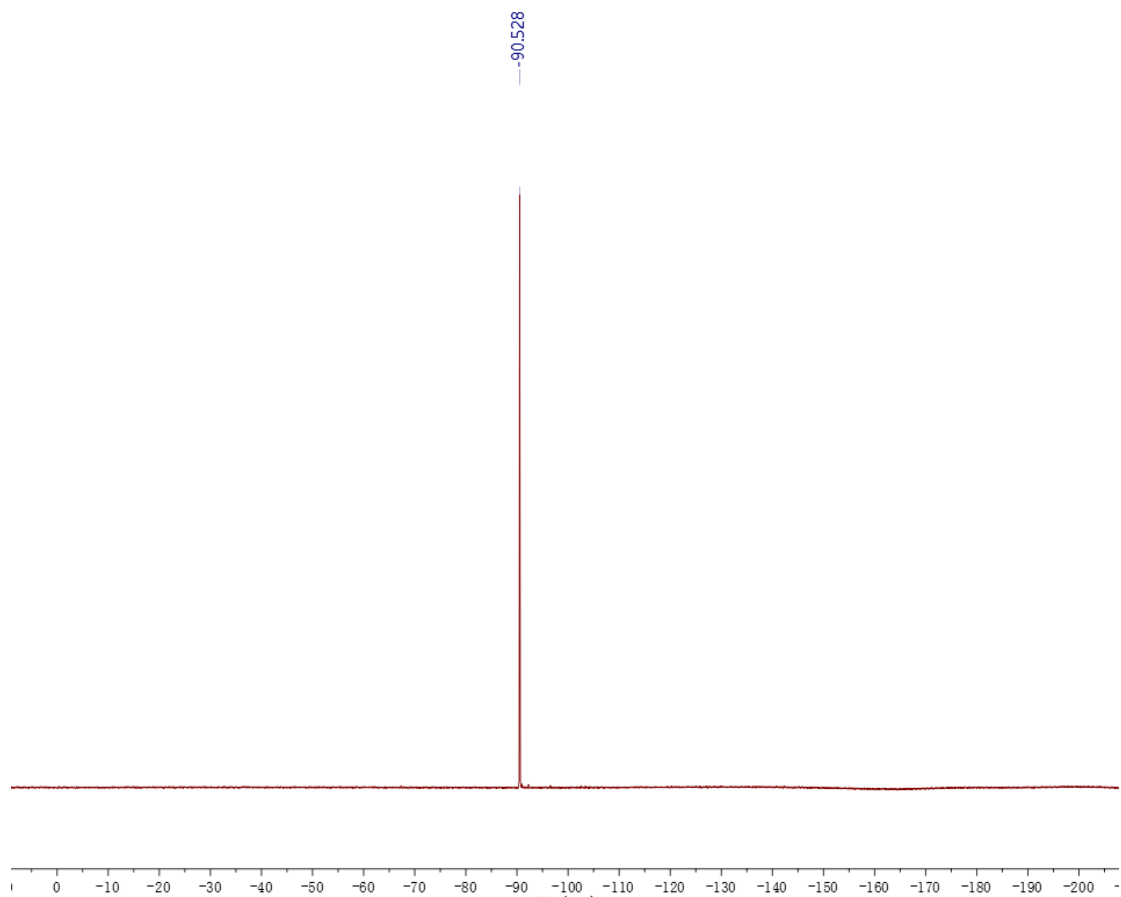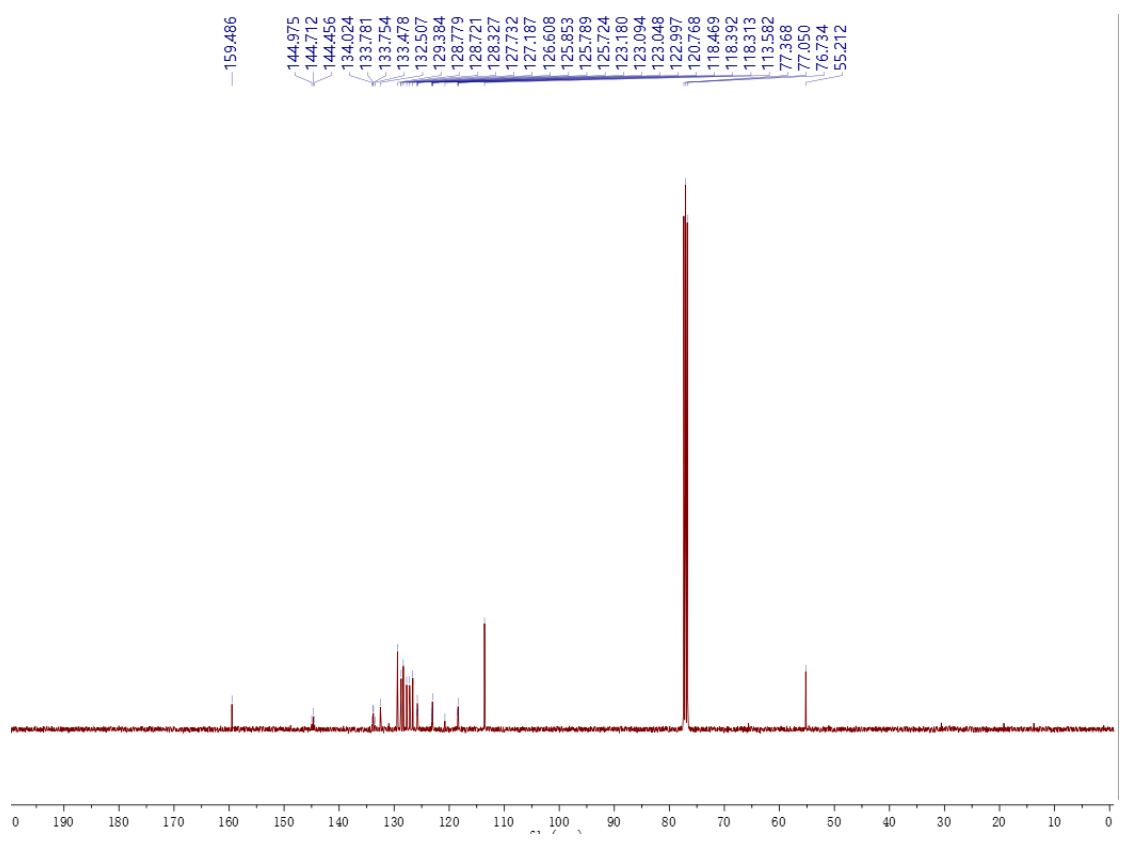

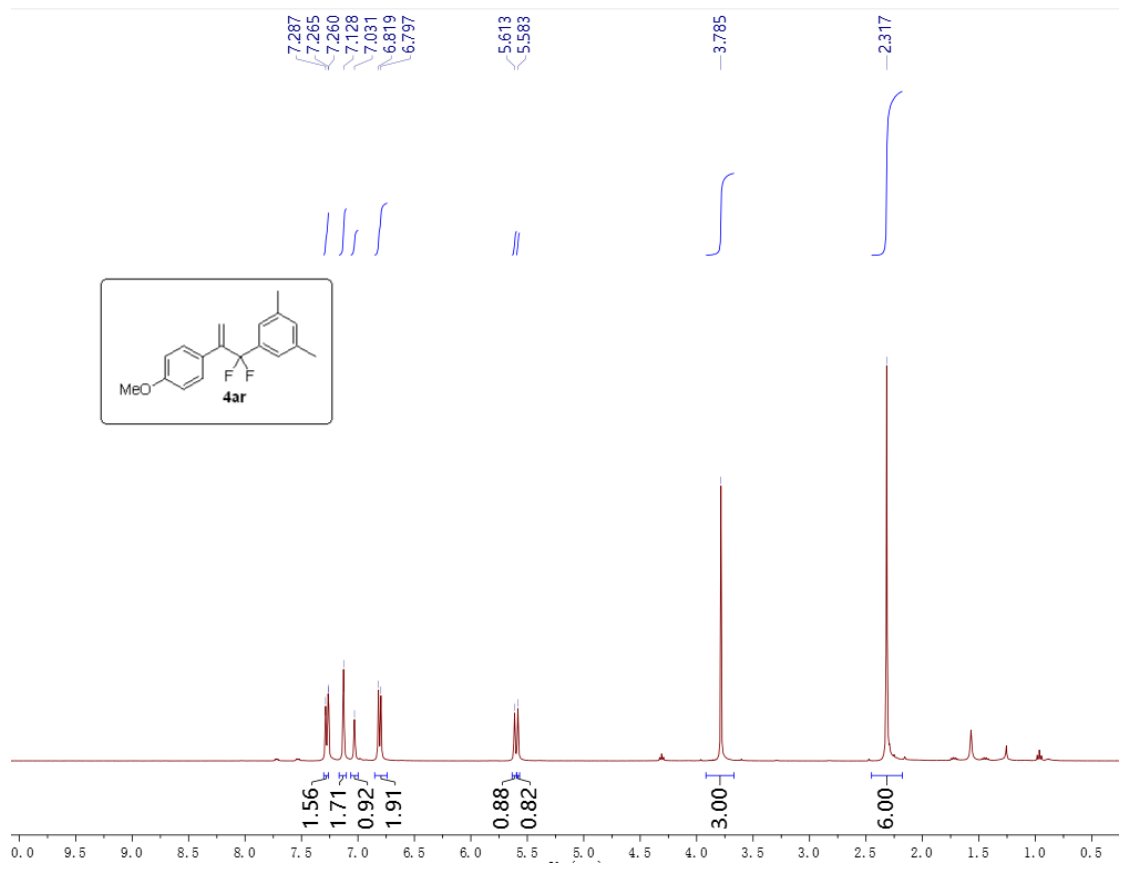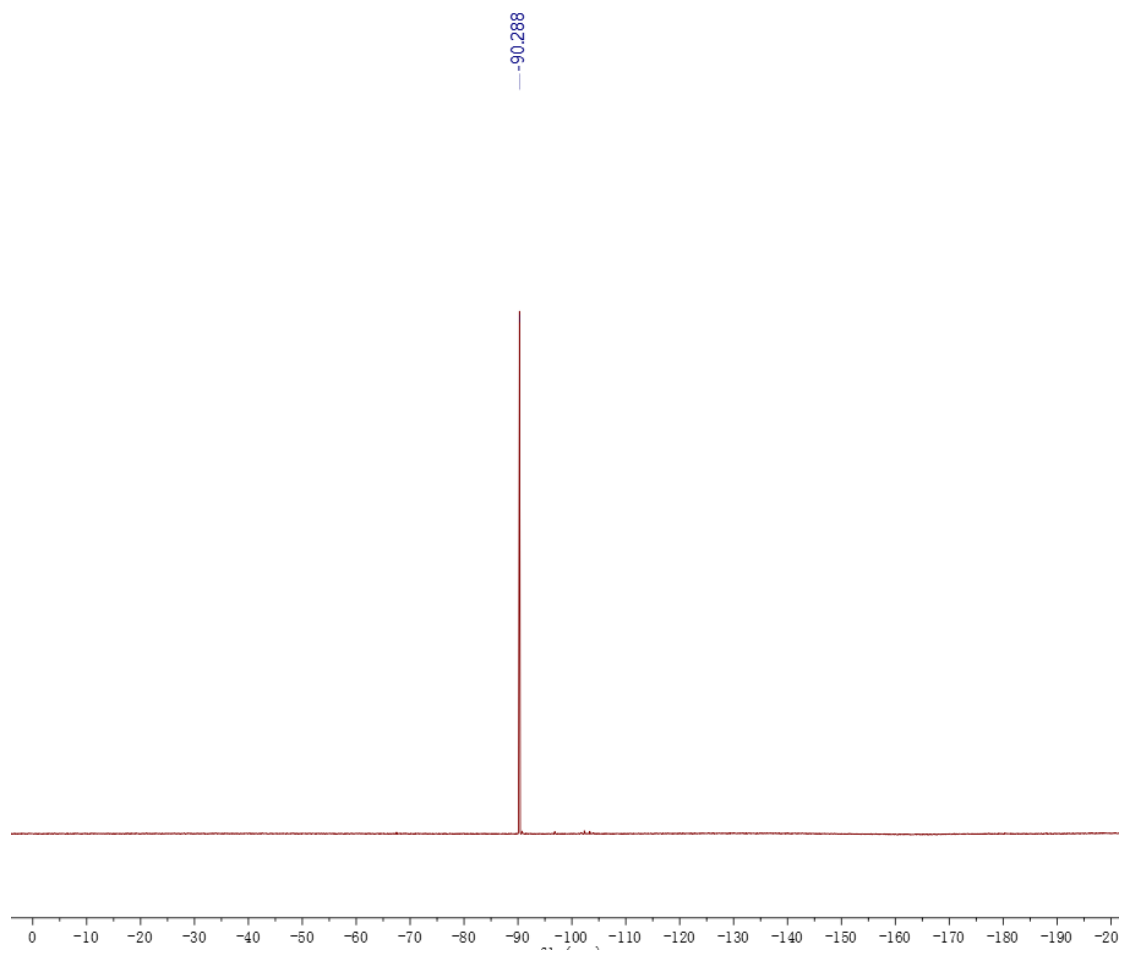

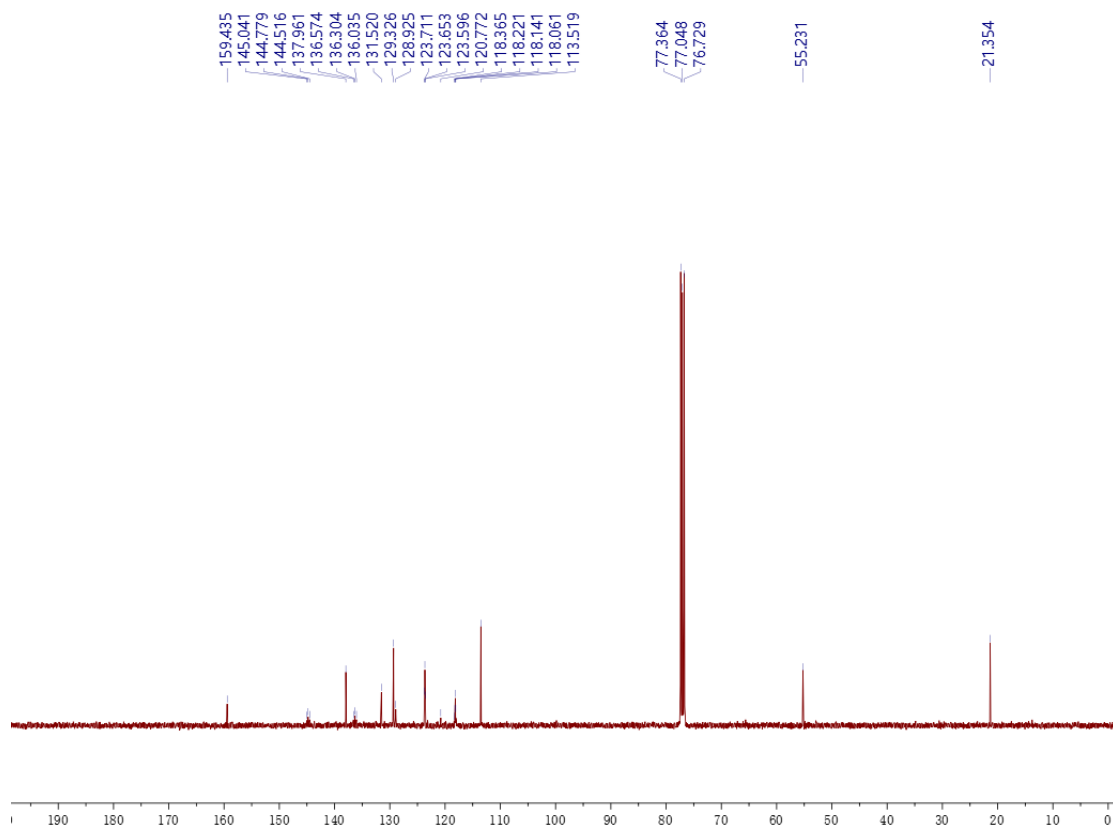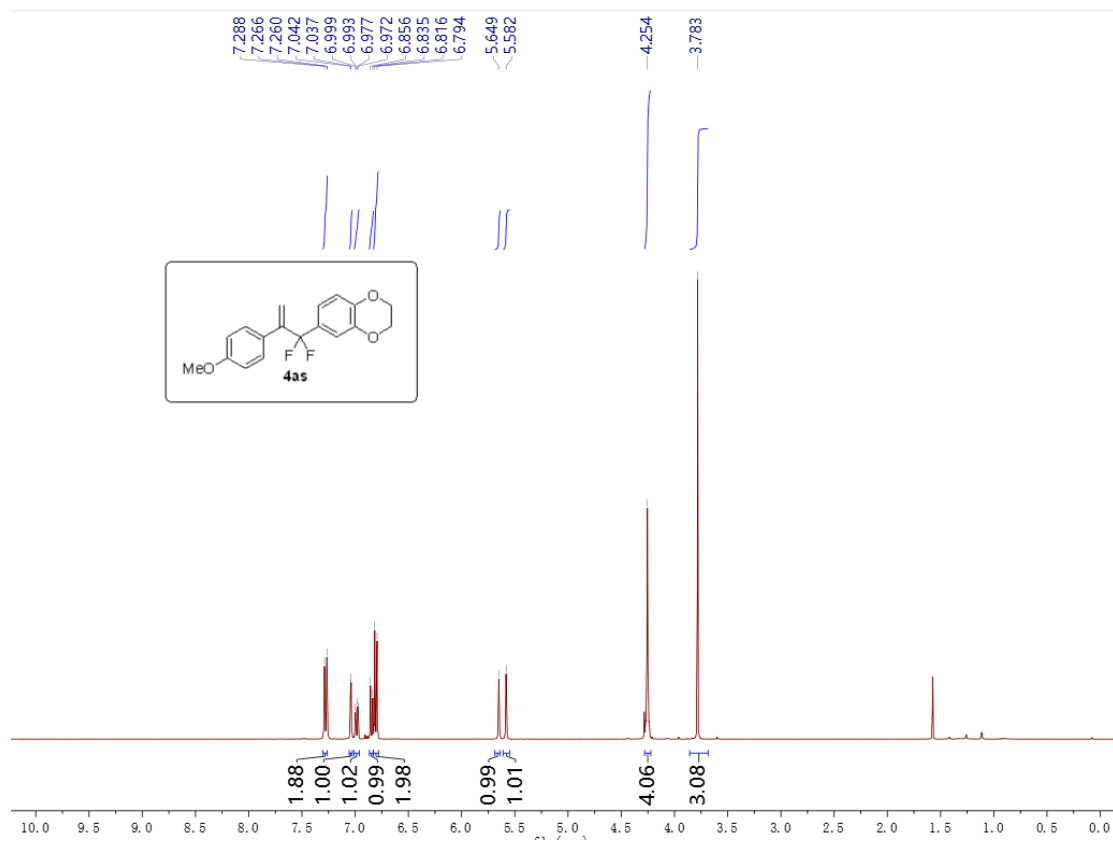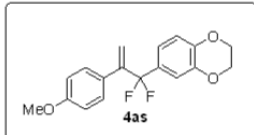



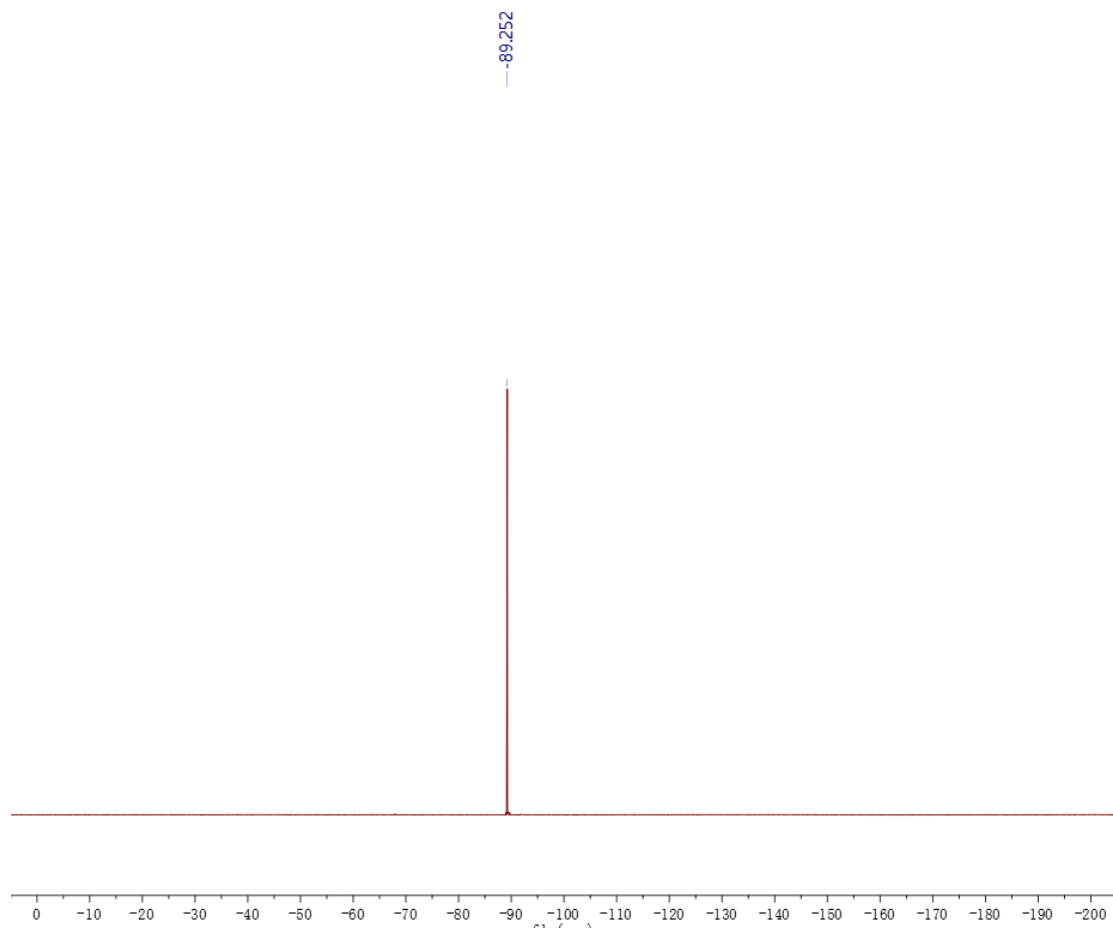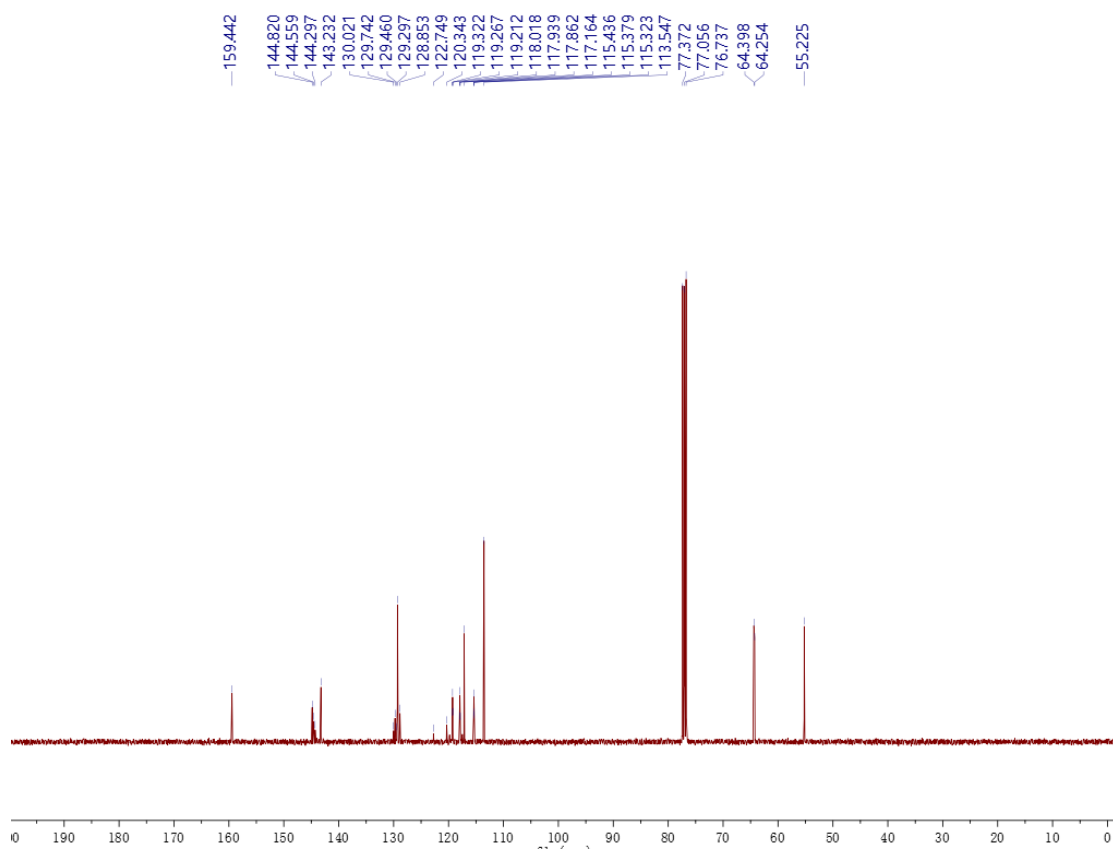

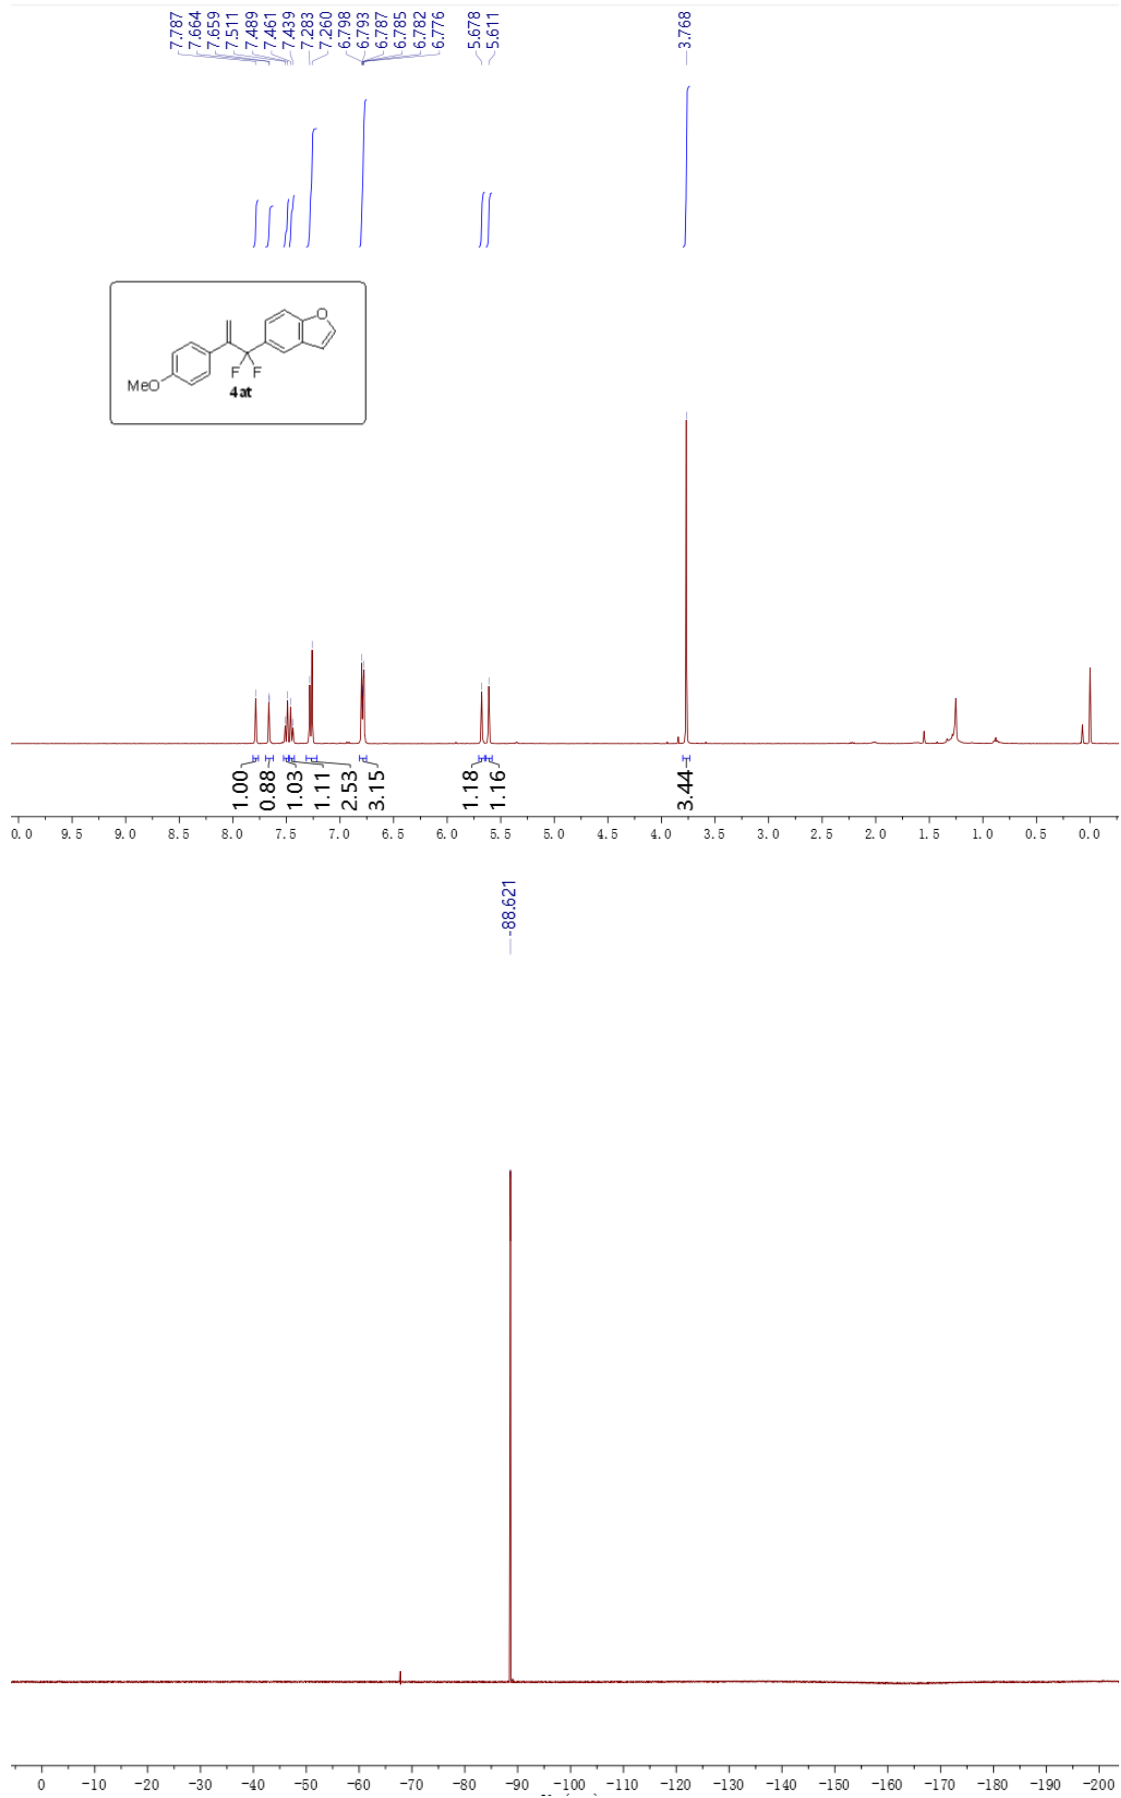

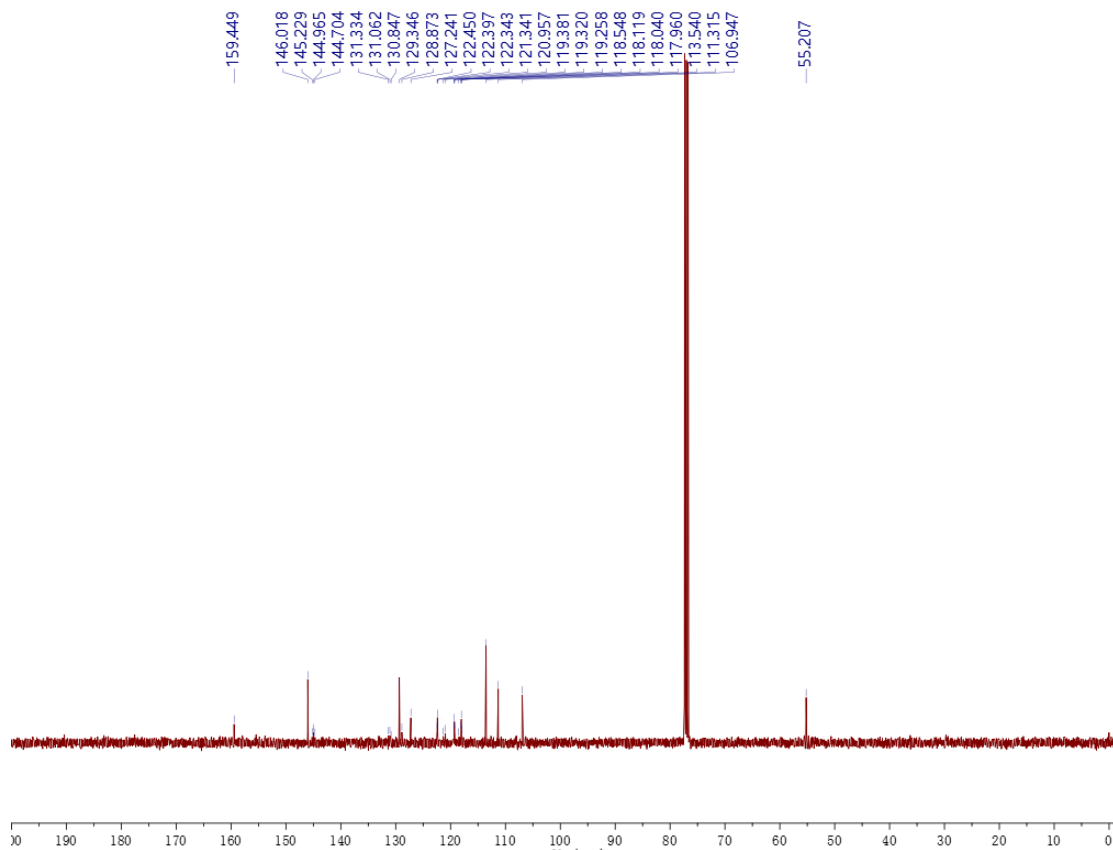

LN-8-44U, 1, 1, 1r

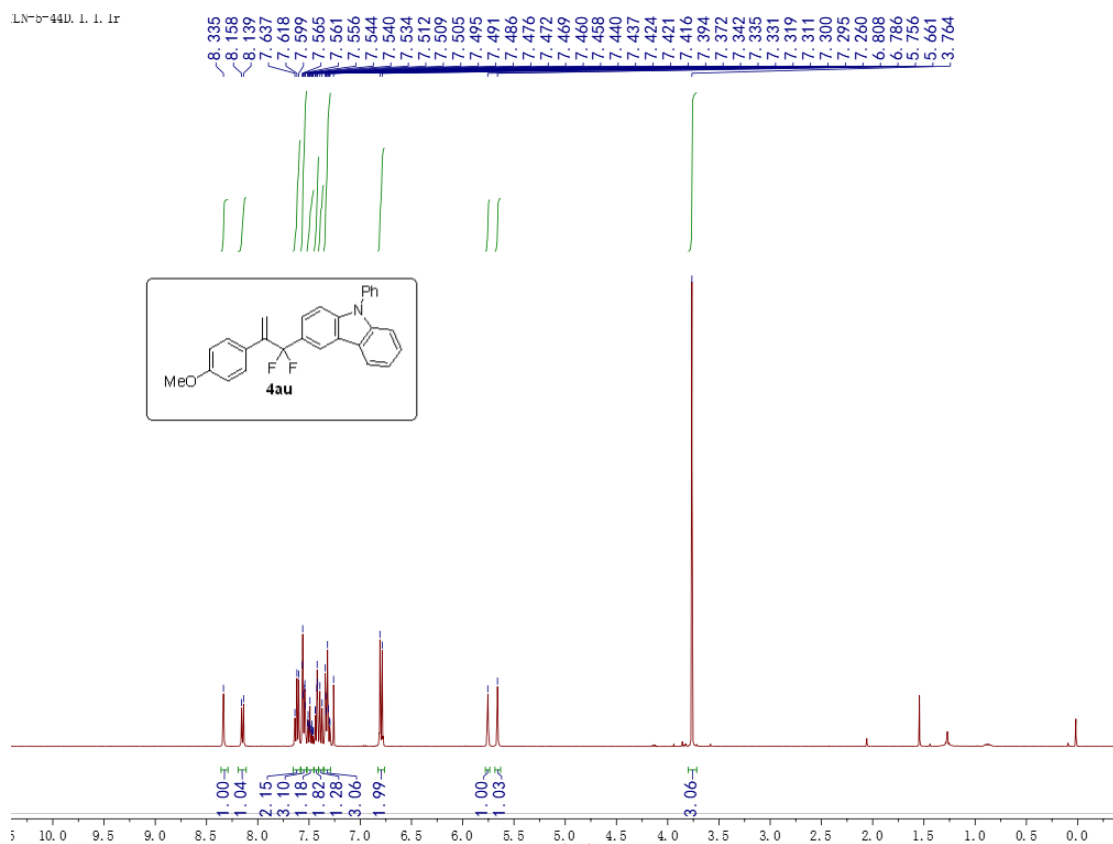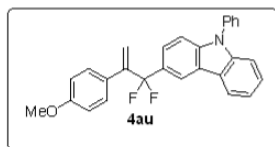

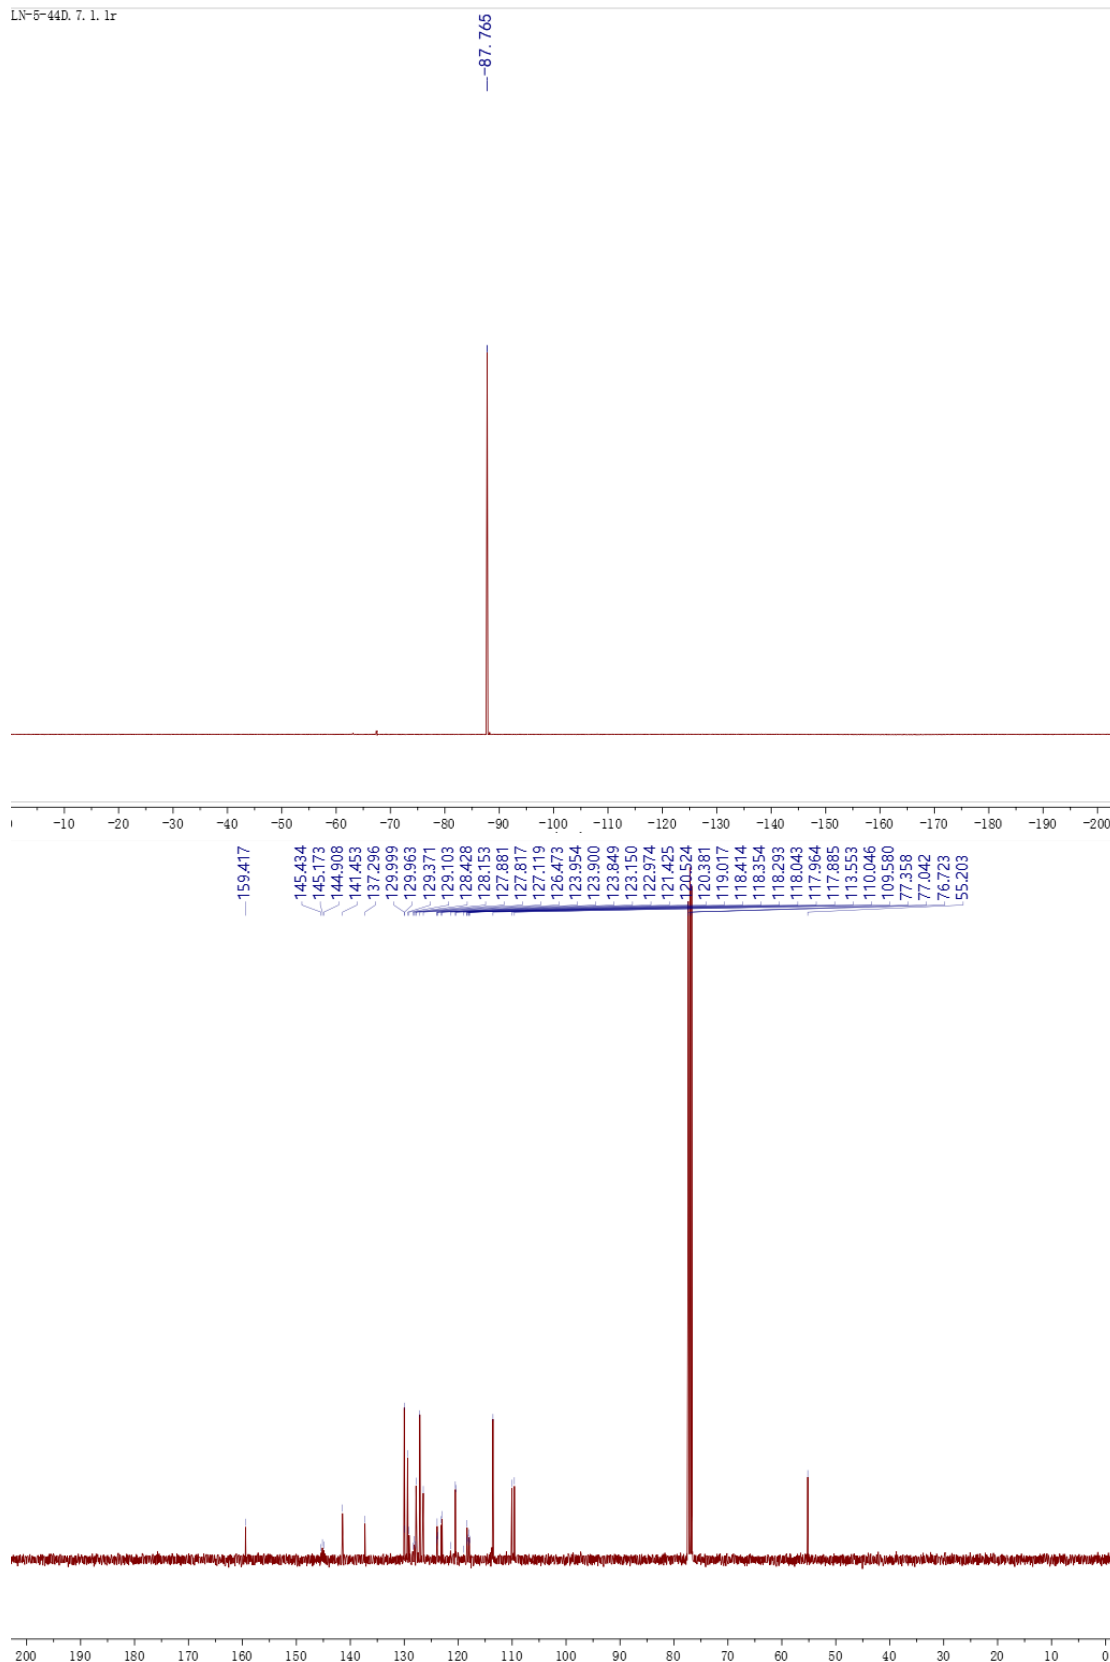

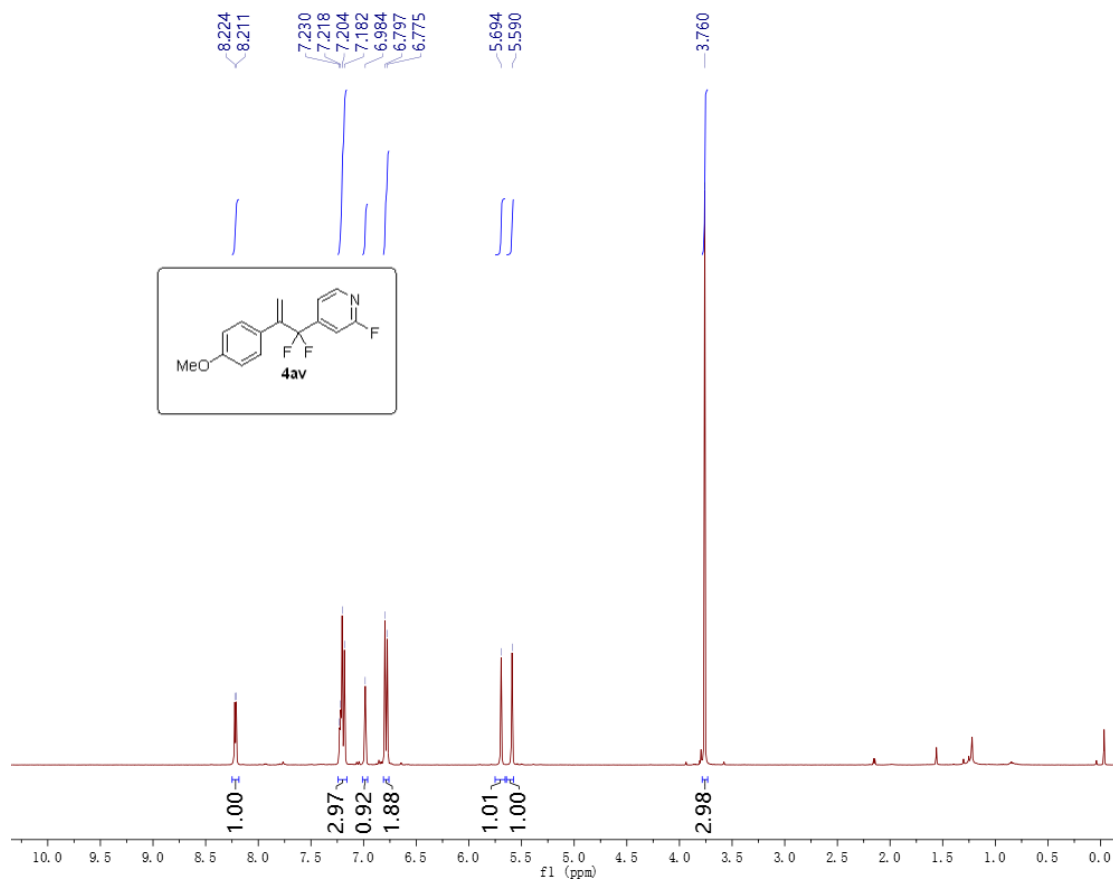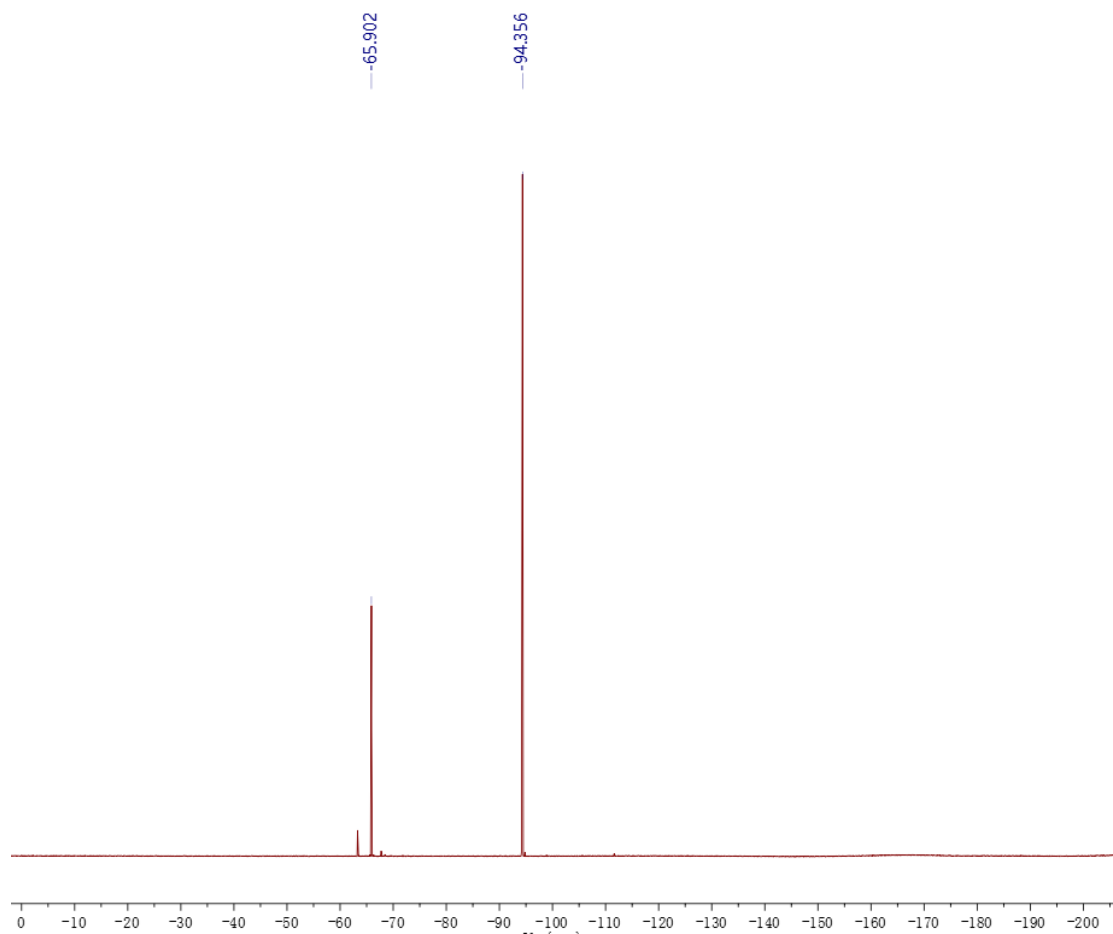

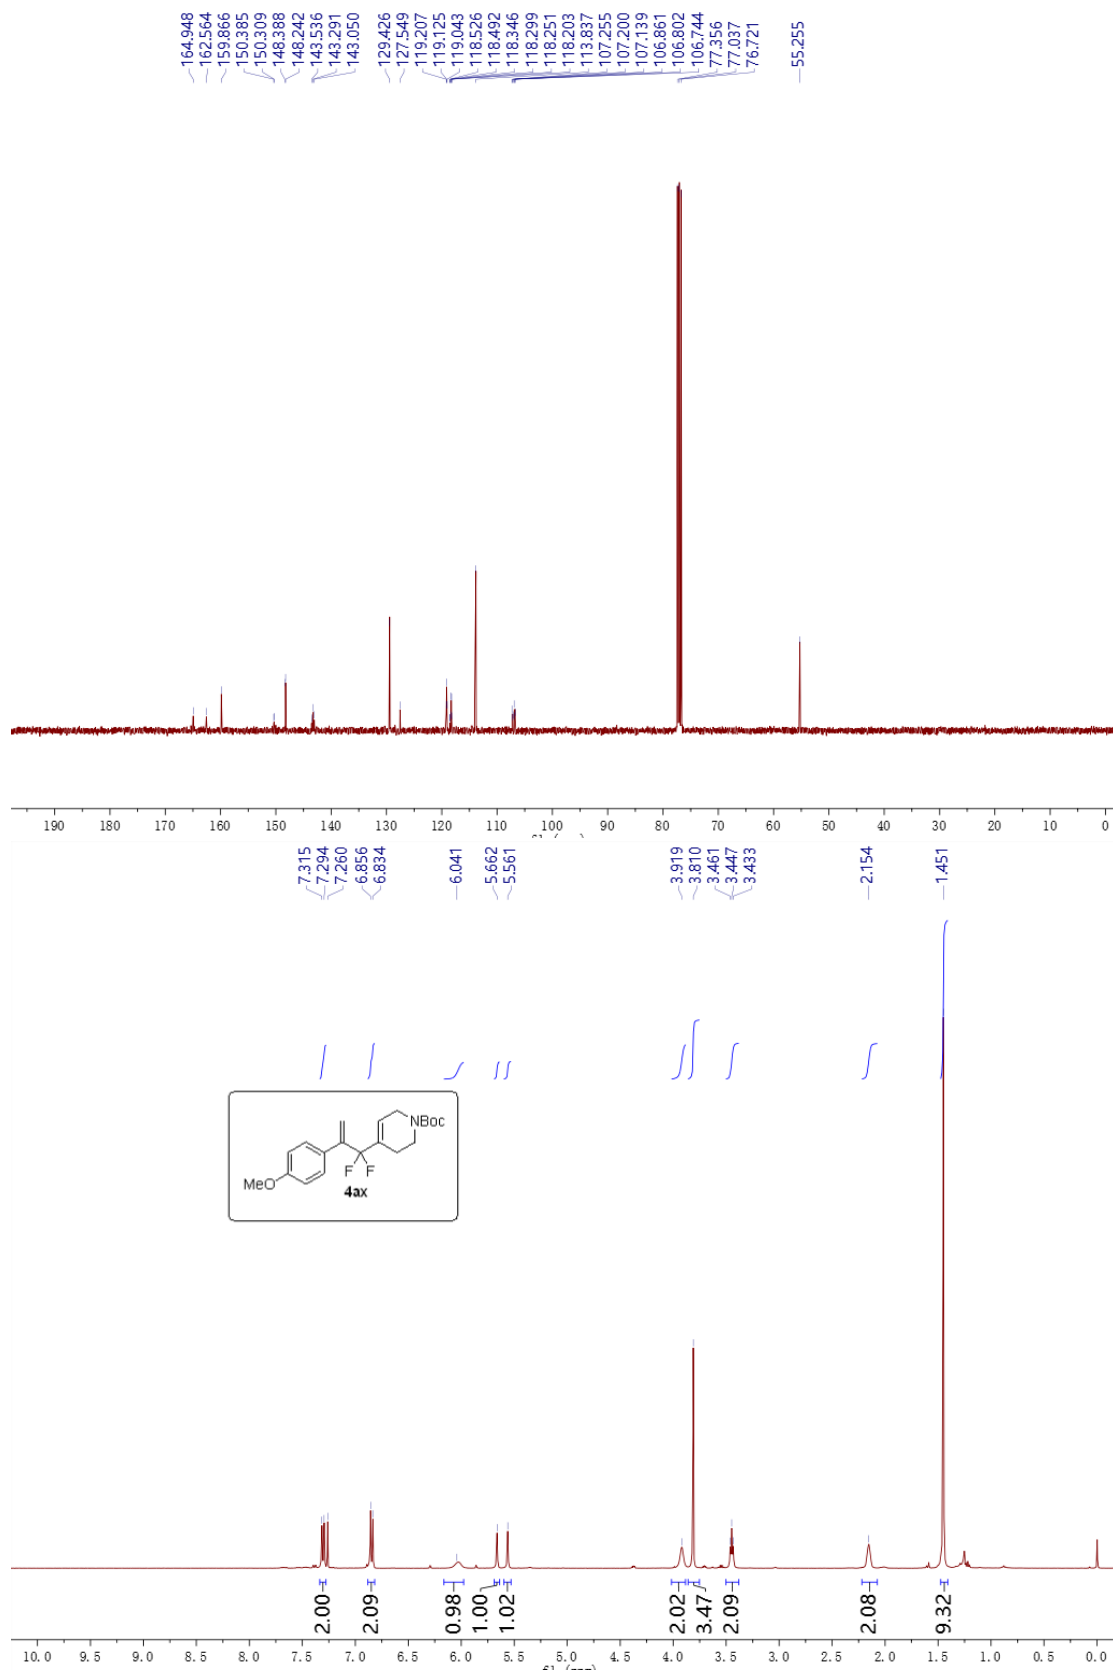

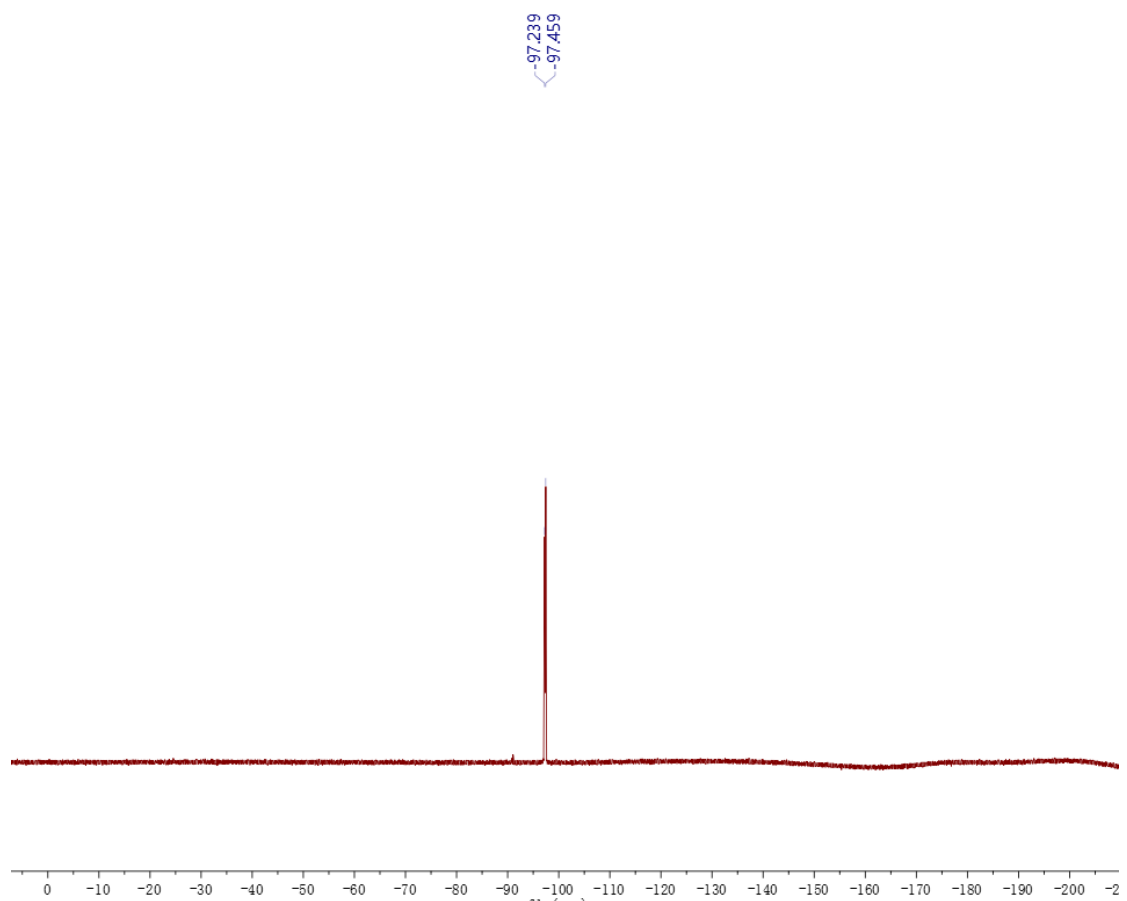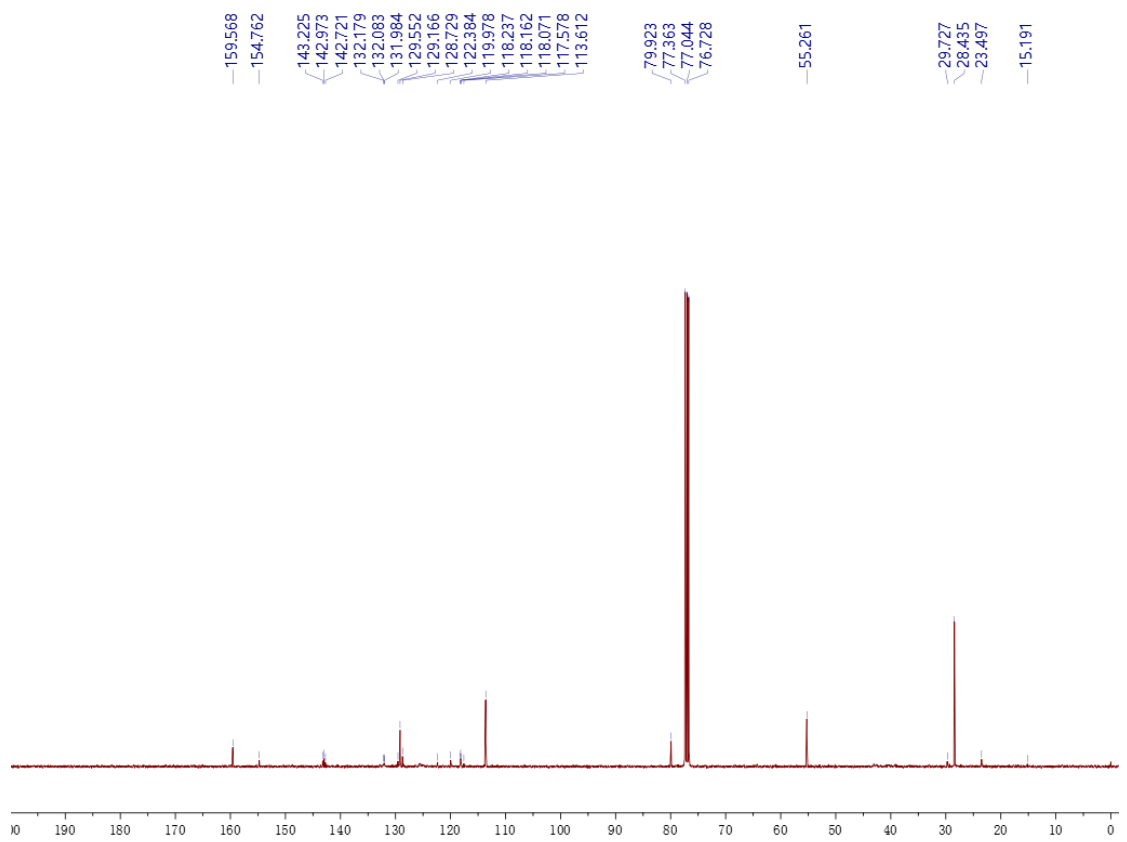

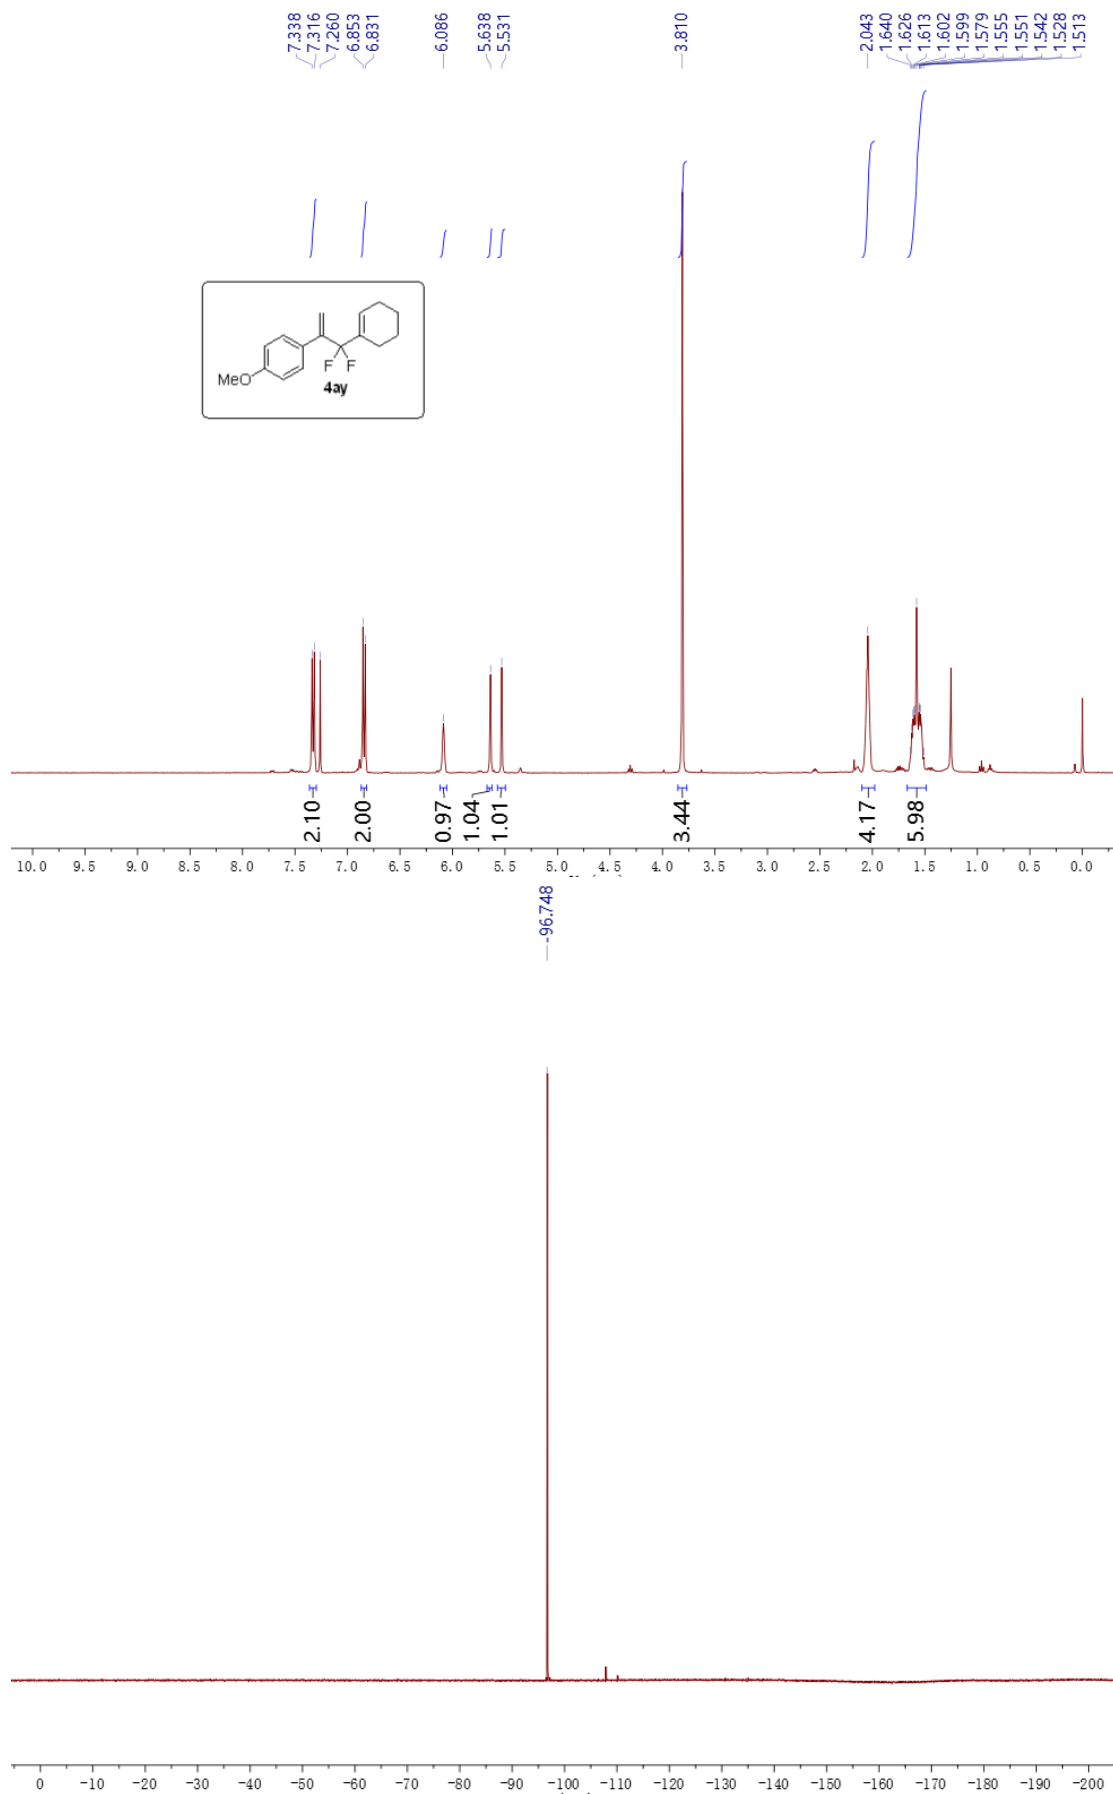



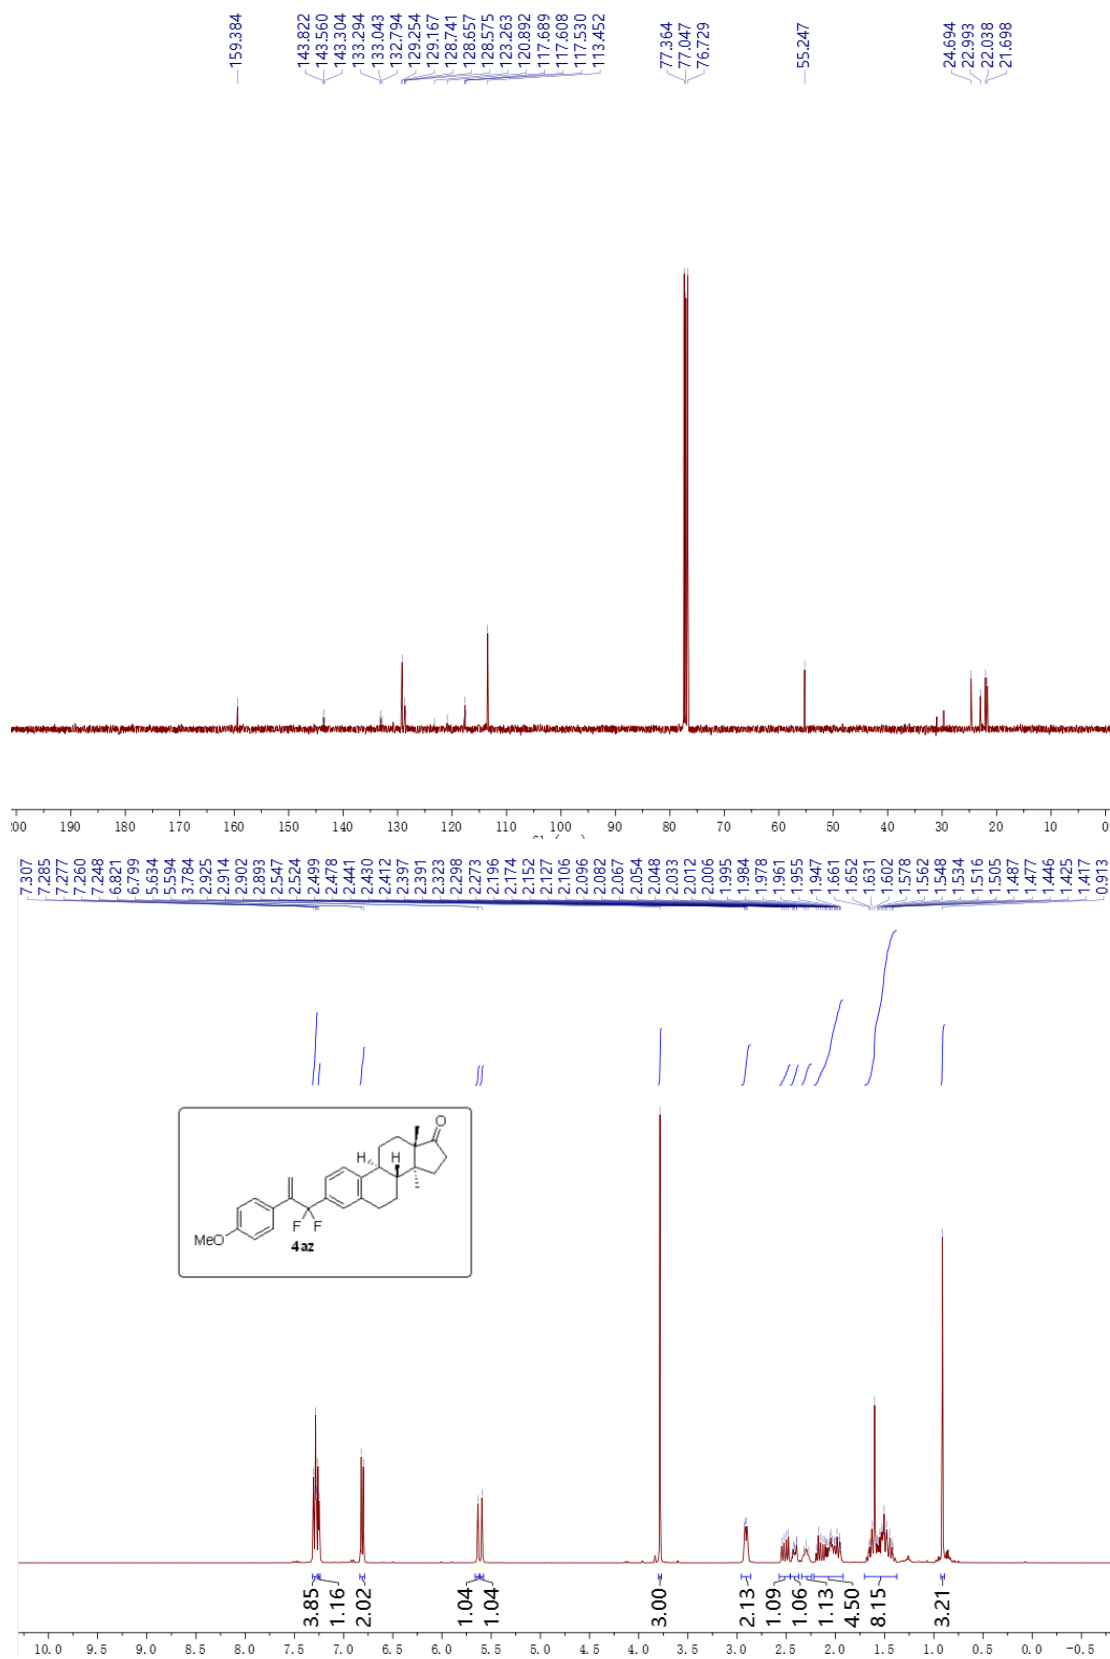

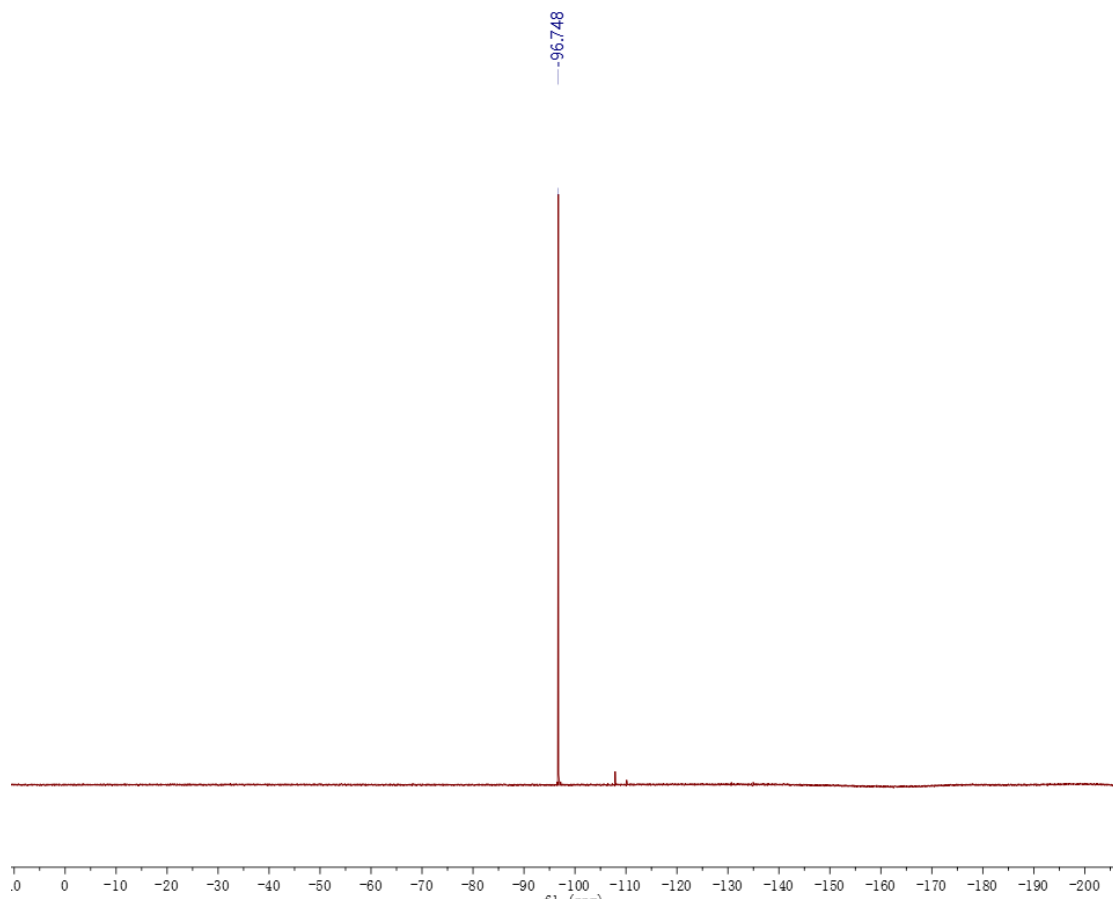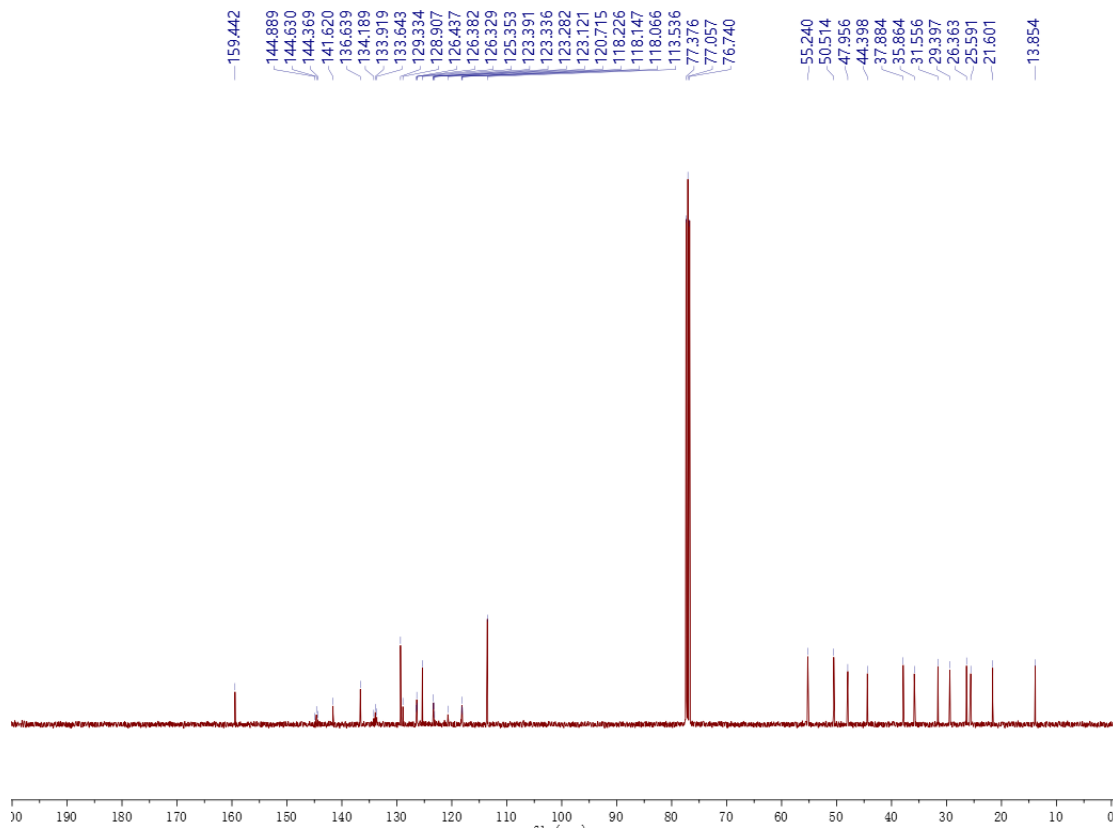

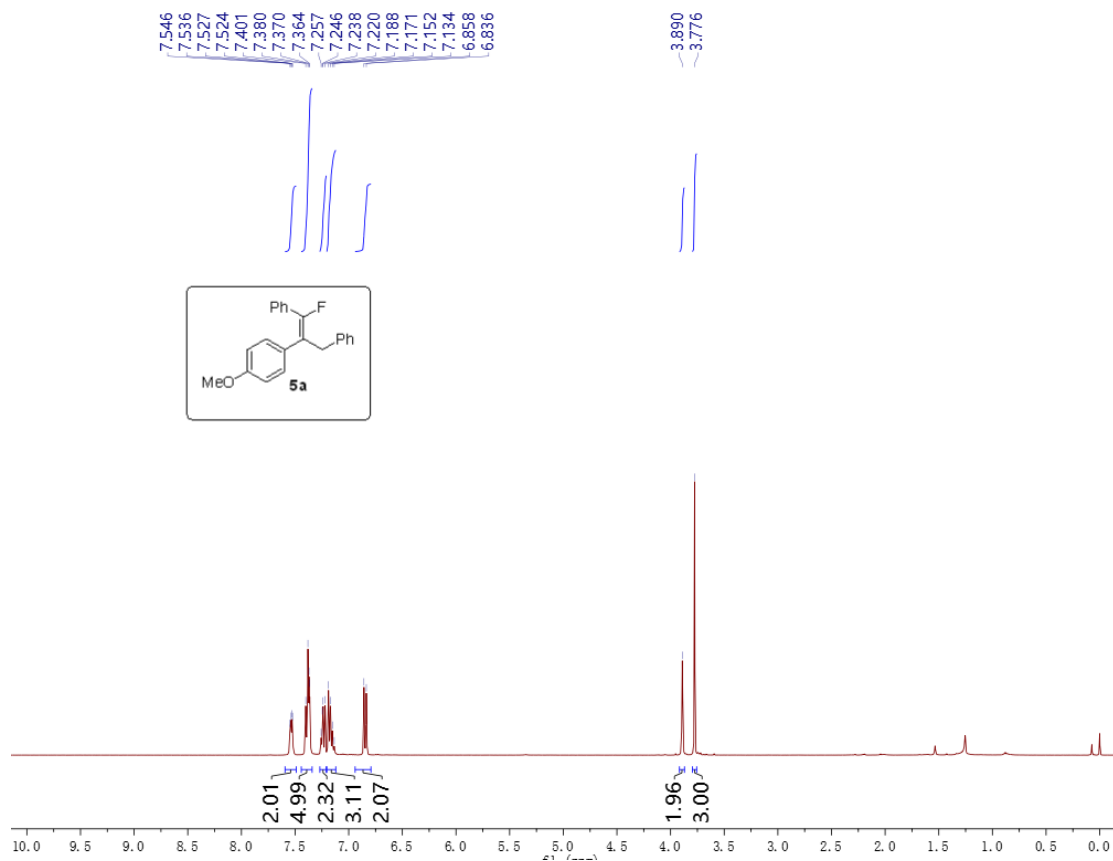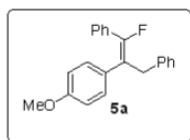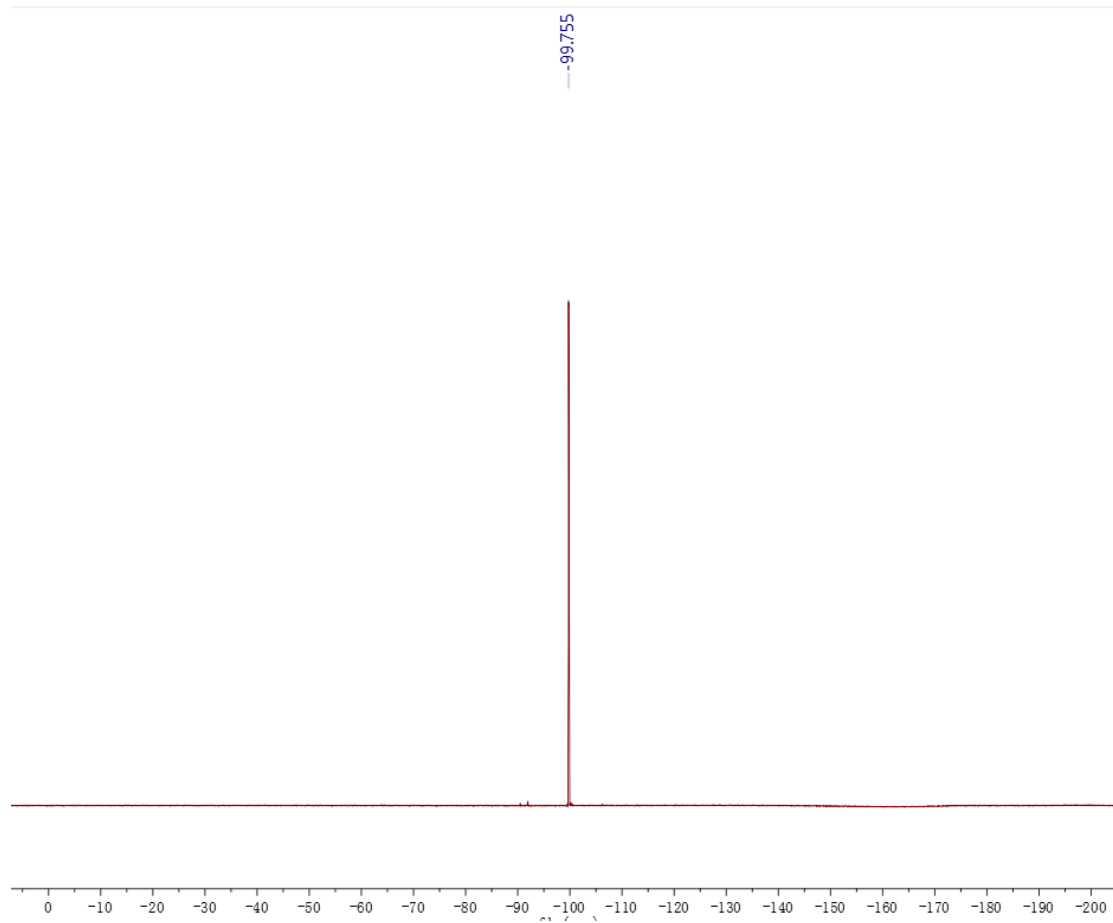

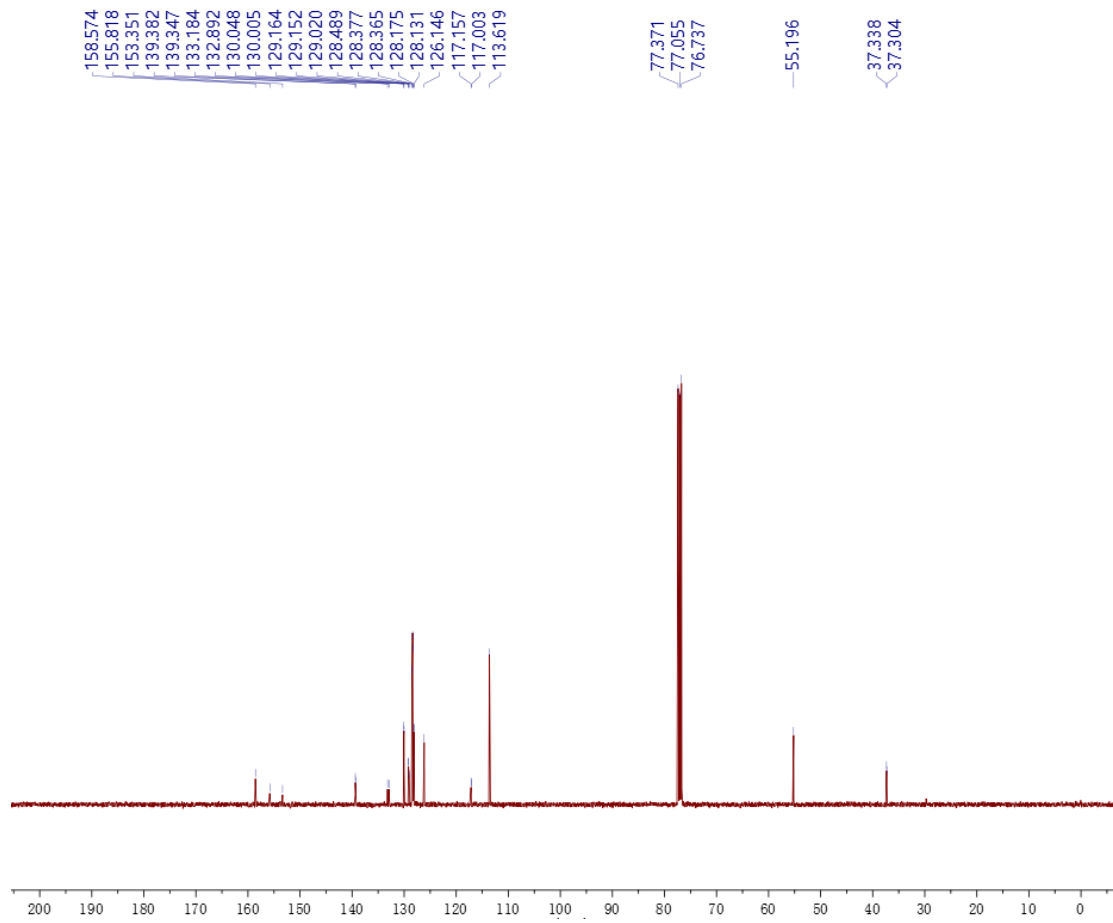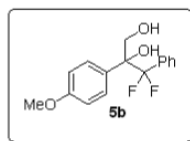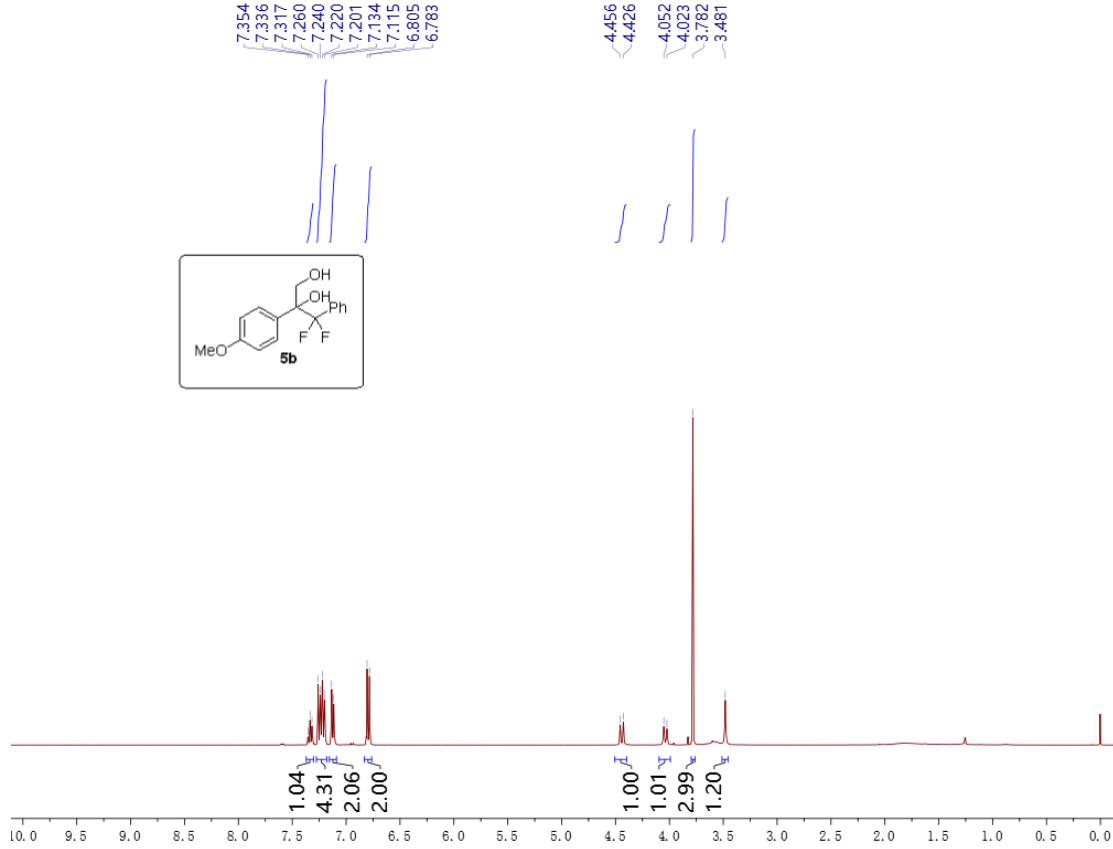

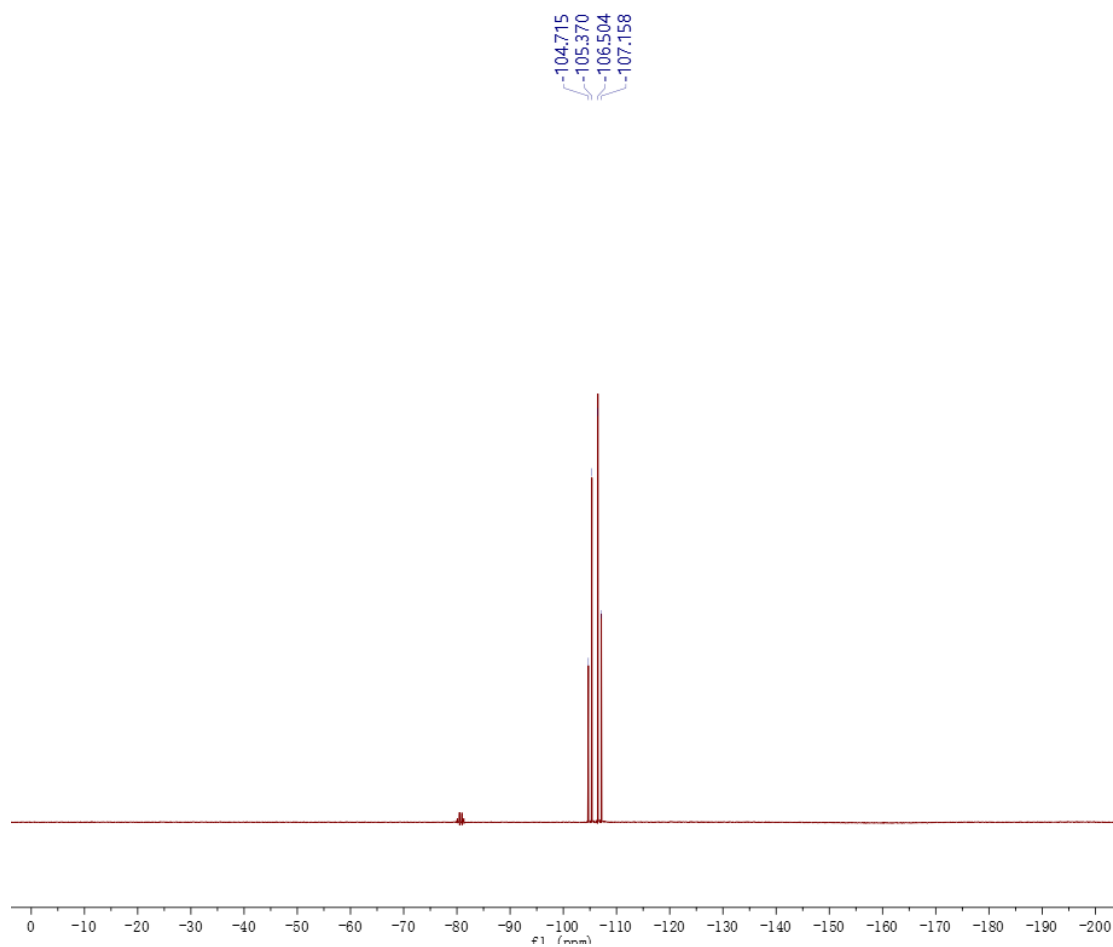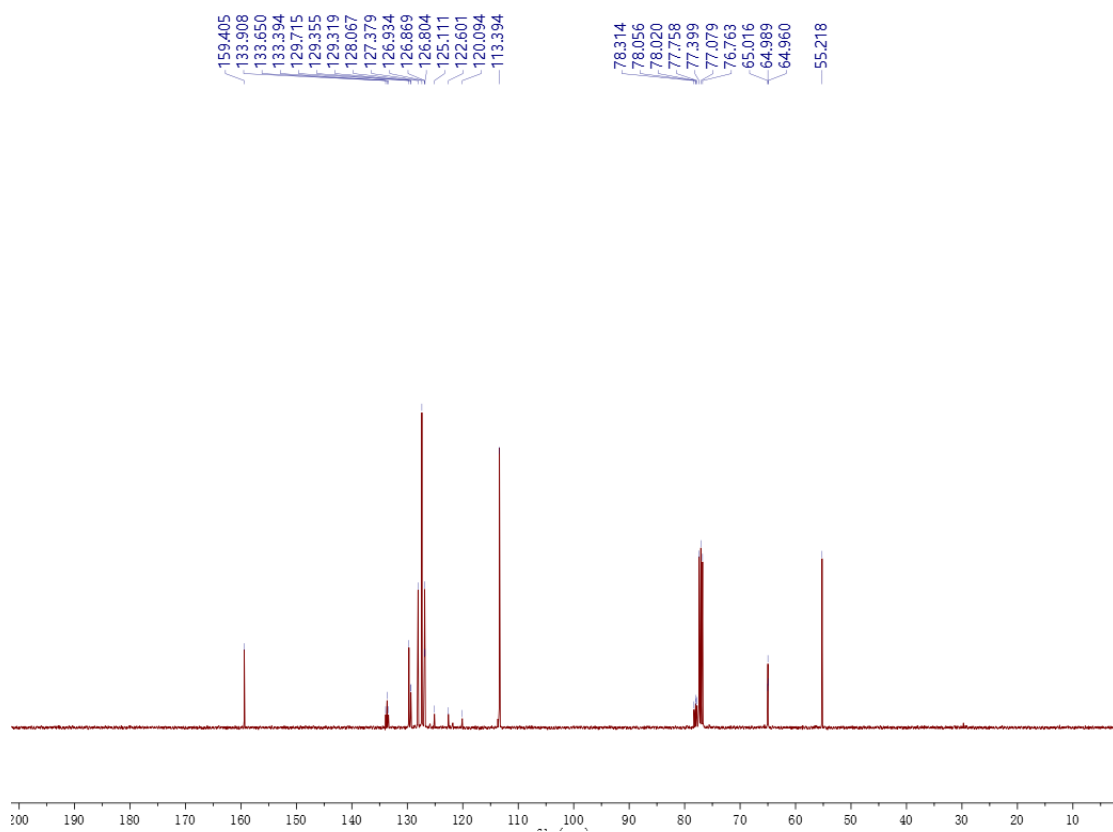

## References

- [1] a) T. Ichitsuka, T. Fujita, T. Arita, J. Ichikawa, *Angew. Chem. Int. Ed.* **2014**, *53*, 7564–7568; b) Y. Liu, Y. Zhou, Y. Zhao, J. Qu, *Org. Lett.* **2017**, *19*, 946–949.
- [2] T. A. Hamlin, C. B. Kelly, R. M. Cywar, N. E. Leadbeater, *J. Org. Chem.* **2014**, *79*, 1145–1155.
